# Supplementary material for: Understanding the unique reactivity patterns of nickel/JoSPOphos manifold in the nickel-catalyzed enantioselective C–H cyclization of imidazoles
Source: Royal Society of Chemistry journal article supplement (doi:10.1039/d0sc04578k), 2020-11-04
Supplement: d0sc04578k1.pdf [file d0sc04578k1.pdf]

## Electronic Supplementary Information

### Understanding the unique reactivity patterns of nickel/JoSPOphos manifold in the Nickel-catalyzed enantioselective C–H cyclization of imidazoles

Jian-Biao Liu,<sup>\*a</sup> Xin Wang,<sup>a</sup> Antonis Messinis,<sup>b</sup> Xiao-Jun Liu,<sup>a</sup> Rositha Kuniyil,<sup>b</sup> De-Zhan Chen<sup>\*a</sup> and Lutz Ackermann<sup>\*b</sup>

<sup>a</sup> College of Chemistry, Chemical Engineering and Materials Science, Shandong Normal University, Jinan 250014, China.

<sup>b</sup> Institut für Organische und Biomolekulare Chemie, Georg-August-Universität Göttingen, Göttingen 37077, Germany.

\*E-mail: jianbiaoliu.thu@gmail.com;

chendzh@sdu.edu.cn;

Lutz.Ackermann@chemie.uni-goettingen.de

### Table of Contents

|                                                                                                           |     |
|-----------------------------------------------------------------------------------------------------------|-----|
| 1. The coordination mode of JoSPOphos with nickel.....                                                    | S2  |
| 2. Mechanism of the formation of $\pi$ -allyl nickel(II) complex <b>3</b> . ....                          | S4  |
| 3. The complete free energy profile for nickel(II)-promoted hydroarylation <i>via</i> $\sigma$ -CAM. .... | S6  |
| 4. On the energy difference between various substrate-coordinated complexes. ....                         | S8  |
| 5. Additional result for nickel(0)-promoted hydroarylation <i>via</i> the OA mechanism. ....              | S19 |
| 6. The formation of the ( <i>S</i> )-product <i>via</i> the LLHT mechanism. ....                          | S20 |
| 7. The formation of the ( <i>S</i> )-product <i>via</i> the new $\sigma$ -CAM mechanism. ....             | S22 |
| 8. GC-FID analysis of the solution resulting from nickel-catalyzed cyclization of <b>1a</b> . ....        | S23 |
| 9. Calculated energies and imaginary frequencies. ....                                                    | S25 |
| 10. Cartesian coordinates of all optimized structures. ....                                               | S30 |

## 1. The coordination mode of JoSPOphos with nickel.

(a) General SPO-PA tautomeric equilibrium and possible coordination modes

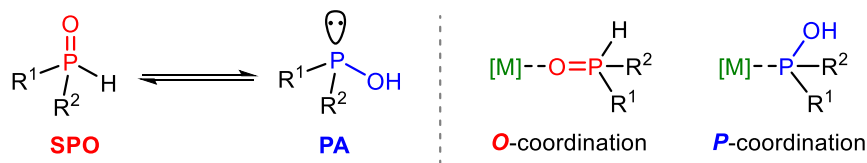

(b) SPO-PA tautomeric equilibrium in JoSPOphos ligand (L)

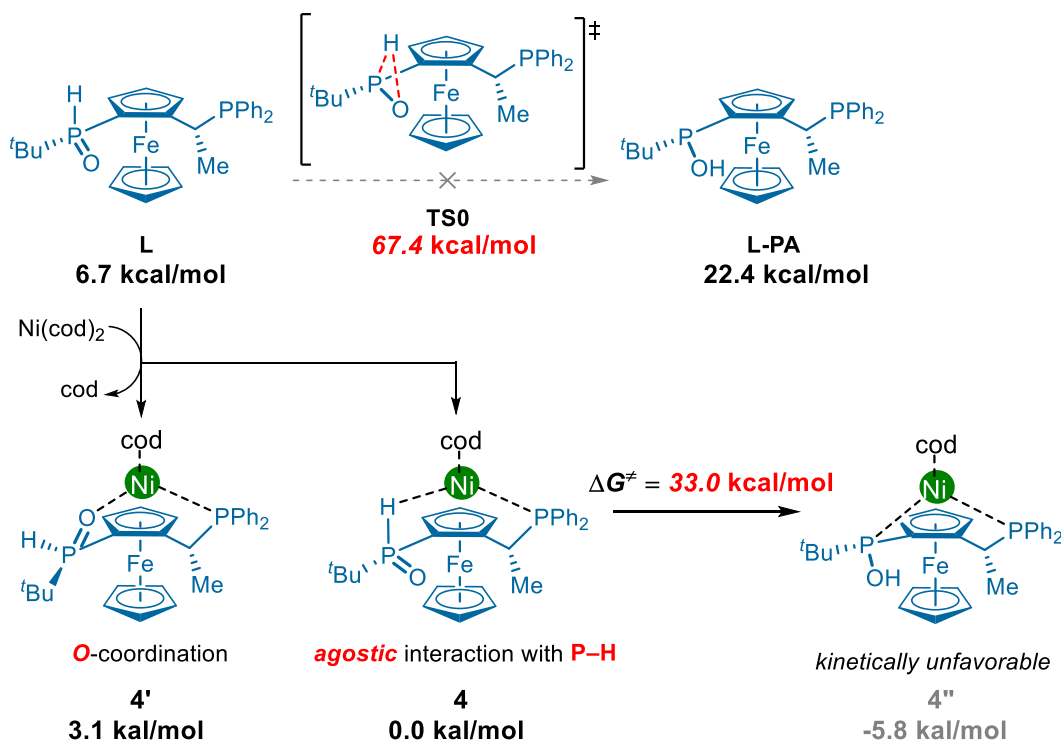

**Scheme S1** SPO-PA tautomeric equilibrium and two different coordination modes of **L** with nickel(0). All energies are presented with respect to complex **4**.

For the JoSPOphos ligand, the secondary phosphine oxide (SPO) and phosphine groups are separately introduced to the chiral ferrocenyl backbone. For SPOs, there generally exists a tautomeric equilibrium between the pentavalent phosphine oxide and the trivalent phosphinous acid (PA), which will lead to different coordination modes with a transition metal (Scheme S1a). We first investigated the tautomeric behavior of JoSPOphos to determine the dominate species. As shown in Scheme S1b, due to the severe strain in the transition state **TS0**, the tautomeric conversion is kinetically unfavorable, with a significantly high energy barrier of 60.7 kcal/mol with respect to **L**. In addition, the possibility of intermolecular hydrogen transfer process is excluded due to the steric hindrance caused by the <sup>t</sup>Bu

group. Ligand exchange of the precatalyst  $\text{Ni}(\text{cod})_2$  with **L** forms the *O*-coordinated complex **4'**, which is exergonic by 3.6 kcal/mol. Interestingly, we located another more stable isomeric form **4**, which is 3.1 kcal/mol lower in energy than **4'**. This result is further verified by additional calculations employing B3LYP-D3(BJ) and M06<sup>[1]</sup> density functionals in combination with def2-TZVP basis set (see Table S1).

Table S1. The energy differences between complexes **4** and **4'** calculated by using different methods.

| Methods                                            | $\Delta\Delta G_{\text{sol}} = \Delta G_{\text{sol}}(\mathbf{4}') - \Delta G_{\text{sol}}(\mathbf{4})$ |
|----------------------------------------------------|--------------------------------------------------------------------------------------------------------|
| B3LYP-D3(BJ)/def2-QZVP//<br>B3LYP-D3(BJ)/def2-TZVP | 2.8 kcal/mol                                                                                           |
| M06/def2-QZVP//M06/def2-TZVP                       | 3.7 kcal/mol                                                                                           |

We also considered the coordination of the **L-PA** ligand with nickel. As shown in Scheme S1, although the corresponding complex **4''** is 5.8 kcal/mol more stable than complex **4**, the transformation requires a relatively high barrier of 33.0 kcal/mol. The free energy profile for the conversion from complex **4** to **4''** is given in Fig. S1.

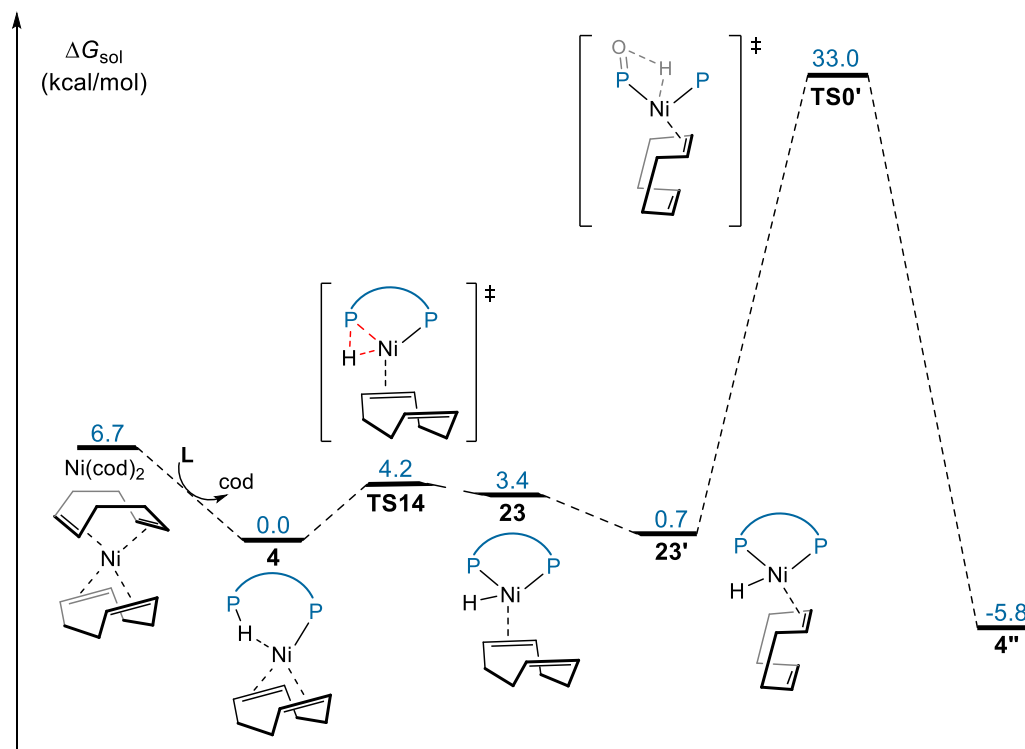

Fig. S1 Free energy profile for the formation of complex **4''**.

## 2. Mechanism of the formation of $\pi$ -allyl nickel(II) complex **3**.

The calculated energy profile for the formation of **3** is given in Fig. S2. The optimized structures of the representative transition states are shown in Fig. S3. All energies are presented with respect to complex **4**, which is formed by ligand exchange of the precatalyst Ni(cod)<sub>2</sub> with **L**. This ligand substitution is exergonic by 6.7 kcal/mol. Complex **4** then undergoes facile oxidative addition of P–H bond through **TS14** with a low activation free energy of 4.2 kcal/mol, forming the square planar nickel hydride complex **23**. The subsequent migratory insertion of the C=C into Ni–H bond only requires a barrier of 0.7 kcal/mol from **23**. We also considered the possibility of direct transformation from complex **4** to **24** via LLHT, in which the oxidative addition of P–H bond and migratory insertion occur concurrently. However, we failed to locate the corresponding LLHT transition state.

Upon formation of **24**, the traditional chain walking involving consecutive  $\beta$ -hydride elimination/migratory insertion occurs to yield the  $\pi$ -allyl nickel(II) complex **3**. Rotation of the Ni–C1 bond in **24** occurs first to result in intermediate **25**. Then a facile  $\beta$ -hydride elimination takes place via **TS16** to generate another new nickel hydride **26**, in which the two C=C bonds becomes one carbon closer. The subsequent migratory insertion of the newly formed C1=C8 into Ni–H bond occurs through **TS17**, which gives another agostic intermediate **28**. In analogous to the **25**  $\rightarrow$  **26**  $\rightarrow$  **27**  $\rightarrow$  **28** transformation, **29**  $\rightarrow$  **30**  $\rightarrow$  **21**  $\rightarrow$  **20** proceeds to form the agostic intermediate **20**. The  $\sigma$ -allyl nickel(II) complex **20** ultimately isomerizes to the  $\pi$ -allyl nickel(II) complex **3**, which is exergonic by 14.0 kcal/mol. As compared to the precatalyst Ni(cod)<sub>2</sub>, the complex **3** is 25.2 kcal/mol more stable, explaining why it can be isolated in experiment.

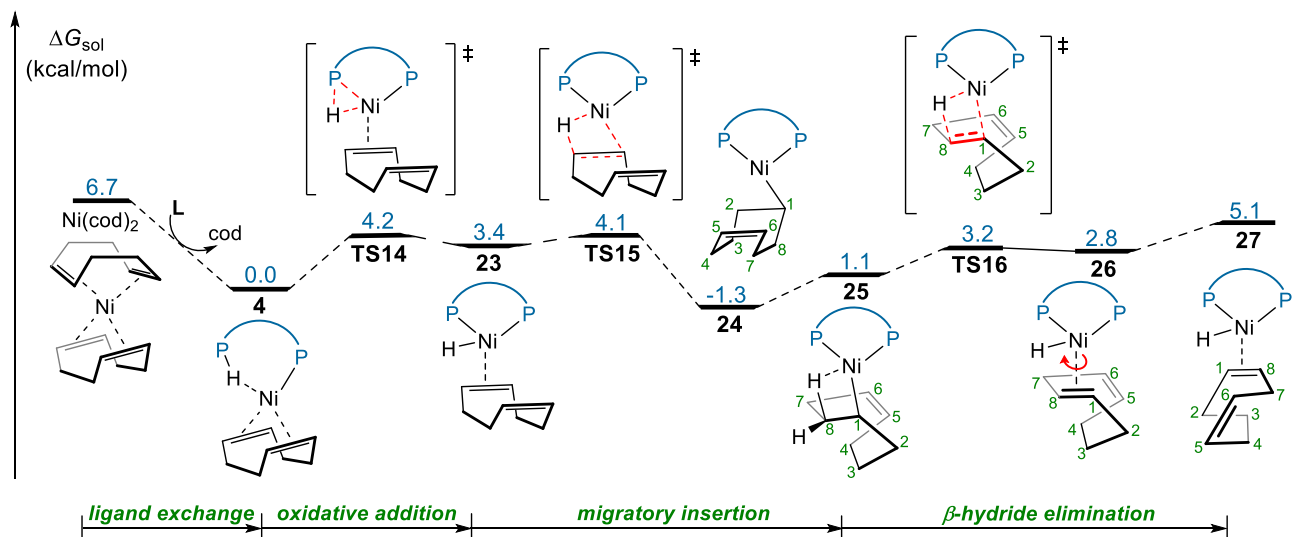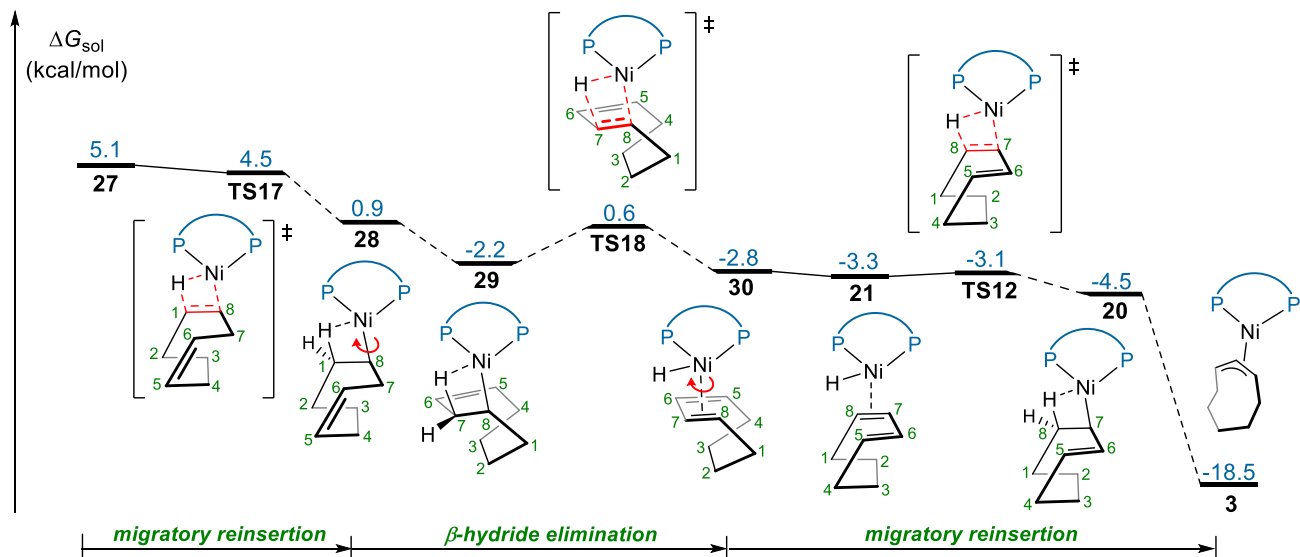

**Fig. S2** Free energy profile for the formation of complex 3 *via* chain walking mechanism.

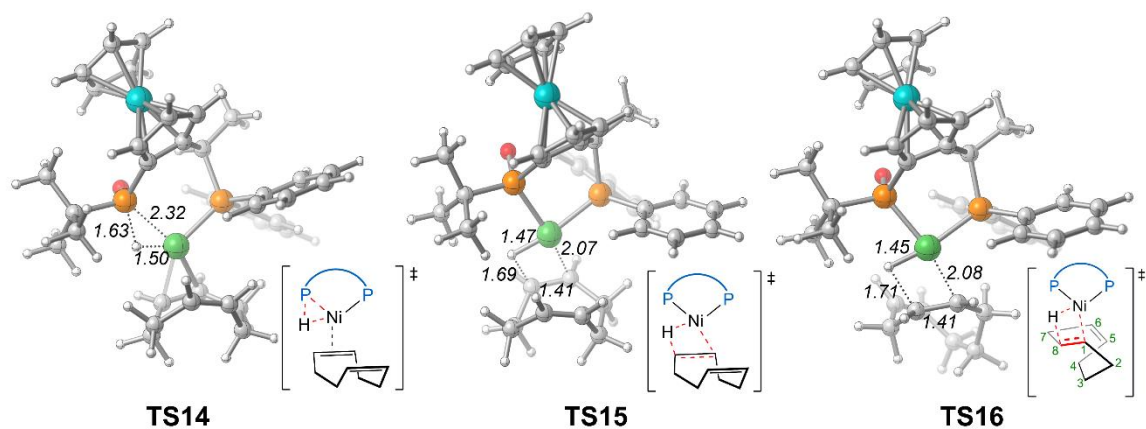

**Fig. S3** Optimized structures of transition states TS14, TS15 and TS16 with selected bond distances in Å.

### 3. The complete free energy profile for nickel(II)-promoted hydroarylation *via* $\sigma$ -CAM.

The complete energy profile for the nickel(II)-promoted hydroarylation *via* the  $\sigma$ -CAM mechanism is given in Fig. S4, which includes the possible coordination of the cyclooctene (coe) with the intermediate and the proton abstraction from an additional substrate **1a**. In addition, we also located a reverse LLHT transition state from intermediate **7** (Fig. S5). Although the reverse LLHT process is very facile, this reaction pathway is disfavored due to the higher barrier of the preceding migratory insertion.

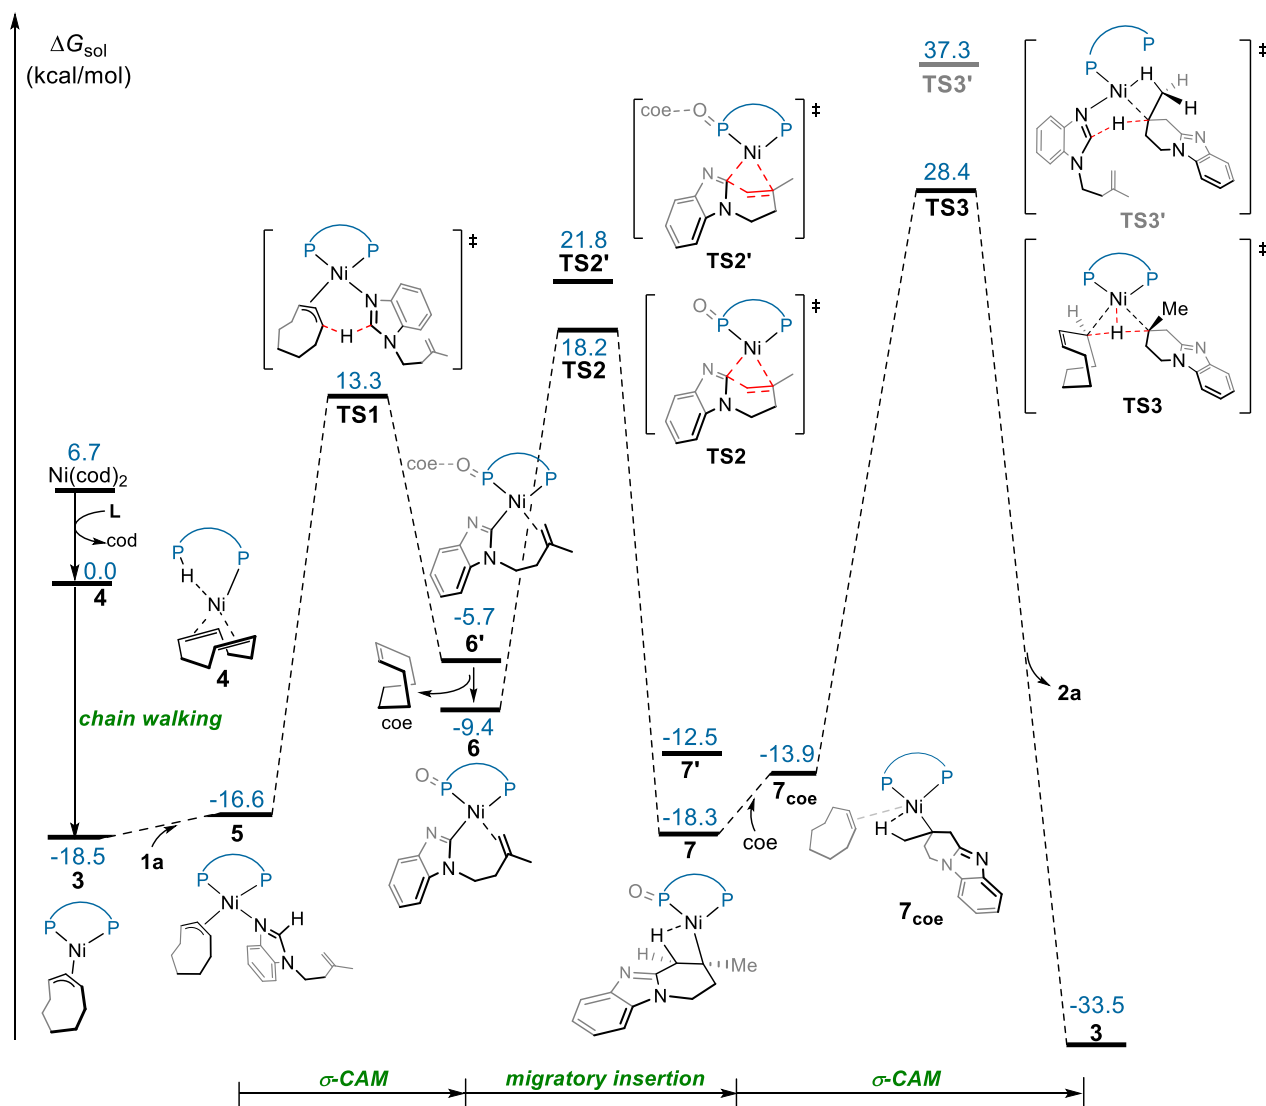

**Fig. S4** The complete free energy profile for the nickel(II)-promoted hydroarylation *via* the  $\sigma$ -CAM mechanism.

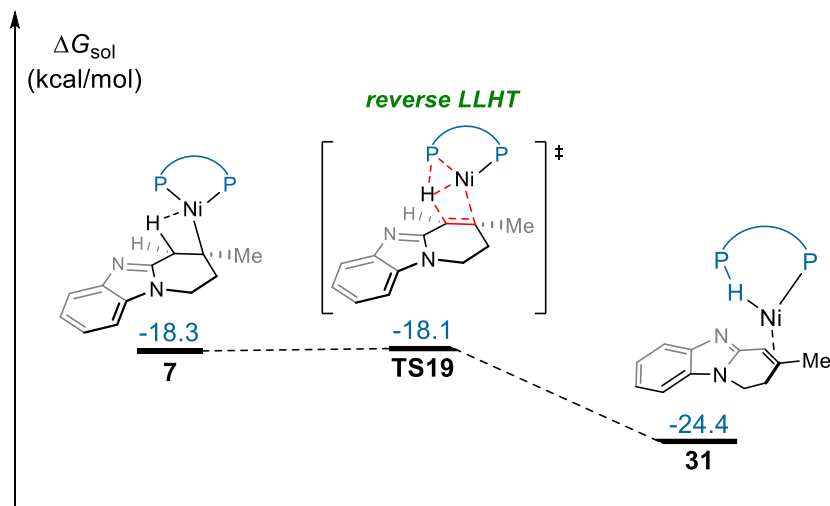

**Fig. S5** Free energy profile for the reverse LLHT from 7.

From complex 3, we also considered the  $\sigma$ -complex-assisted metathesis step. As shown in Fig. S6, during this process, the hydrogen transfers from  $\text{C}(\text{sp}^2)\text{-H}$  to the P(V) atom of JoSPOphos. However, this process requires a significantly higher barrier (TS20,  $\Delta G^\ddagger = 43.7$  kcal/mol relative to 3).

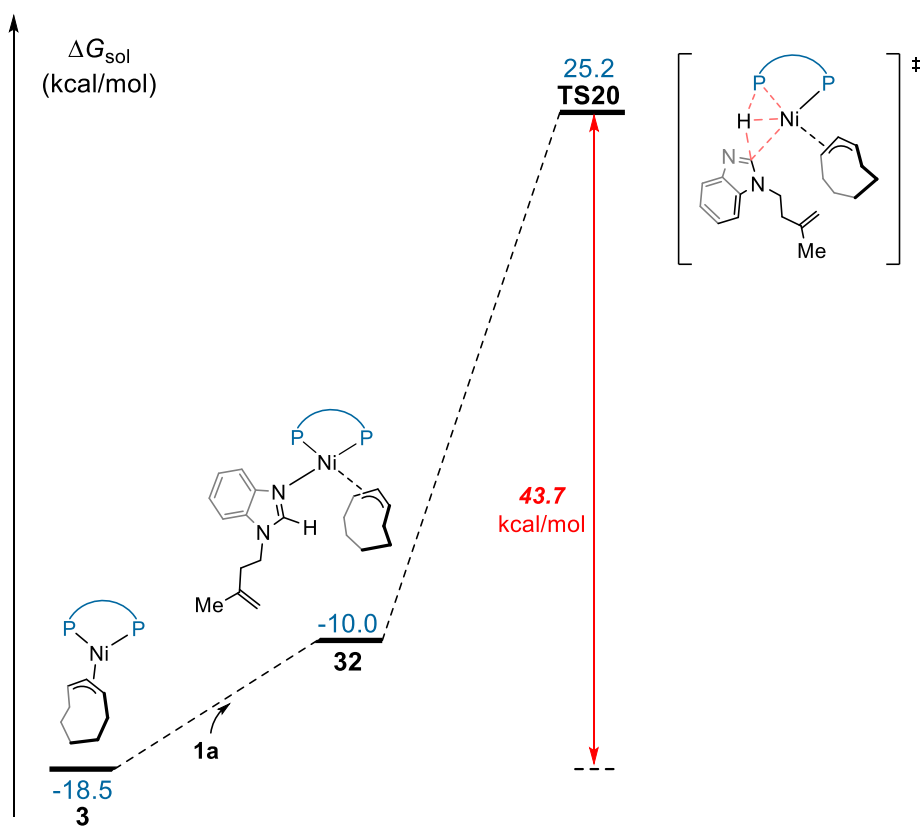

**Fig. S6** Free energy profile for the  $\sigma$ -complex-assisted metathesis from complex 3.

#### 4. On the energy difference between various substrate-coordinated complexes.

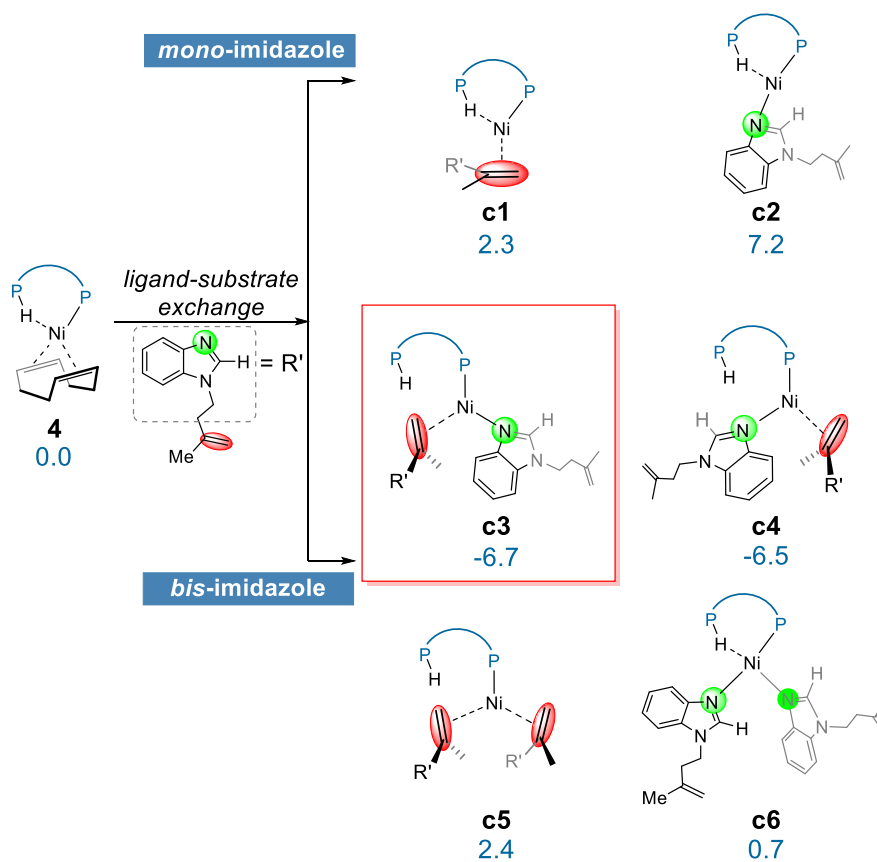

**Fig. S7** The possible ligand-substrate exchanges and corresponding substrate-coordinated complexes with energies in kcal/mol.



Table S2. Geometries and relative energies of the different substrate-coordinated complexes.

| complex | geometry                                                                            | $\Delta G_{\text{sol}}$ (kcal/mol) |
|---------|-------------------------------------------------------------------------------------|------------------------------------|
|         | 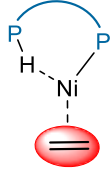   |                                    |
| c1      |   | 2.3                                |
| c1-2    |  | 4.2                                |

|             |                                                                                                                                                                                                                                                                                                                                                                                                                                                                  |            |
|-------------|------------------------------------------------------------------------------------------------------------------------------------------------------------------------------------------------------------------------------------------------------------------------------------------------------------------------------------------------------------------------------------------------------------------------------------------------------------------|------------|
| <p>c1-3</p> | 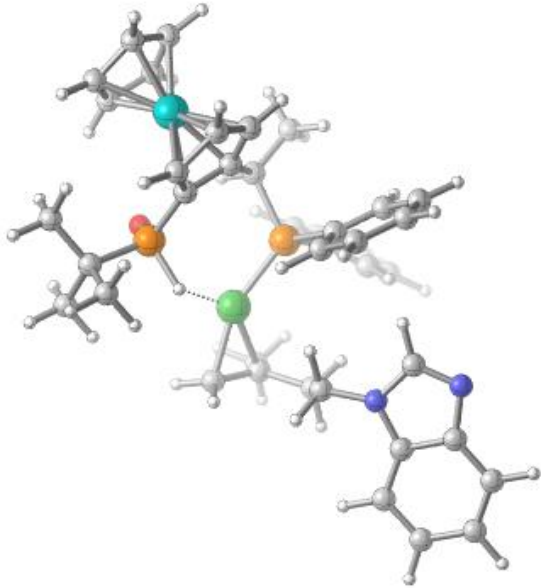 <p>ORTEP diagram showing the displacement of a green nitrogen atom (N) in a nickel complex. The nickel atom (Ni) is coordinated to two phosphorus atoms (P, orange) and a hydrogen atom (H, white). The nitrogen atom (N, green) is shown in two positions, with a displacement of 1.3 Å between them. The displacement is indicated by a dashed line and a curved arrow.</p>  | <p>1.3</p> |
| <p>c1-4</p> |  <p>ORTEP diagram showing the displacement of a green nitrogen atom (N) in a nickel complex. The nickel atom (Ni) is coordinated to two phosphorus atoms (P, orange) and a hydrogen atom (H, white). The nitrogen atom (N, green) is shown in two positions, with a displacement of 0.0 Å between them. The displacement is indicated by a dashed line and a curved arrow.</p> | <p>0.0</p> |
|             |  <p>Schematic diagram showing the nickel atom (Ni) coordinated to two phosphorus atoms (P) and a hydrogen atom (H). A nitrogen atom (N) is also shown, with a curved arrow indicating its displacement.</p>                                                                                                                                                                   |            |

|      |                                                                                     |     |
|------|-------------------------------------------------------------------------------------|-----|
| c2   | 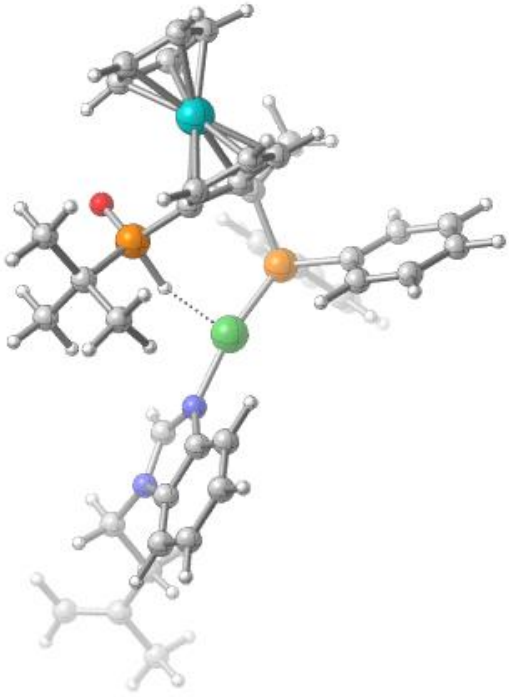   | 7.2 |
| c2-2 |   | 7.7 |
|      |  |     |

|             |                                                                                                                                                                                                                                                                                                                                                                                                                                                                                                     |      |
|-------------|-----------------------------------------------------------------------------------------------------------------------------------------------------------------------------------------------------------------------------------------------------------------------------------------------------------------------------------------------------------------------------------------------------------------------------------------------------------------------------------------------------|------|
| <b>c3</b>   | 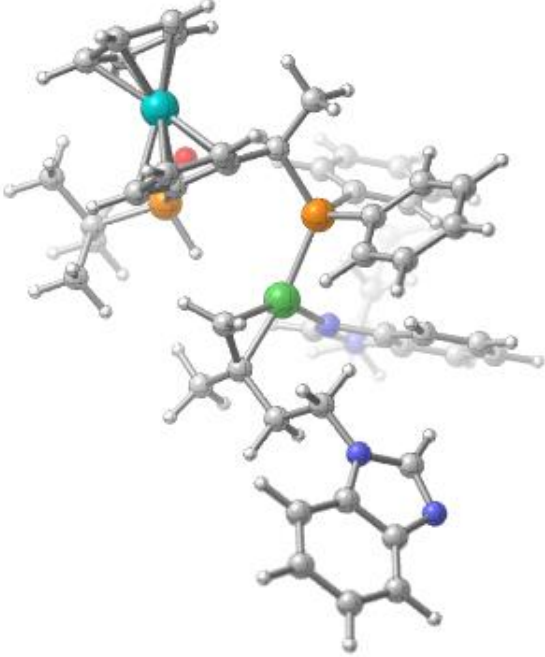 <p>A 3D ball-and-stick model of a complex organic molecule. The structure features a central core with several substituents. Key atoms are highlighted in different colors: a cyan atom at the top, an orange atom below it, a green atom in the center, and a blue atom at the bottom. The molecule is composed of carbon (grey), hydrogen (white), oxygen (red), and nitrogen (blue) atoms.</p>                 | -6.7 |
| <b>c3-2</b> |  <p>A 3D ball-and-stick model of a complex organic molecule, similar to the one above. It features a central core with several substituents. Key atoms are highlighted in different colors: a cyan atom at the top, an orange atom below it, a green atom in the center, and a blue atom at the bottom. The molecule is composed of carbon (grey), hydrogen (white), oxygen (red), and nitrogen (blue) atoms.</p> | -6.2 |

|      |                                                                                     |      |
|------|-------------------------------------------------------------------------------------|------|
| c3-3 | 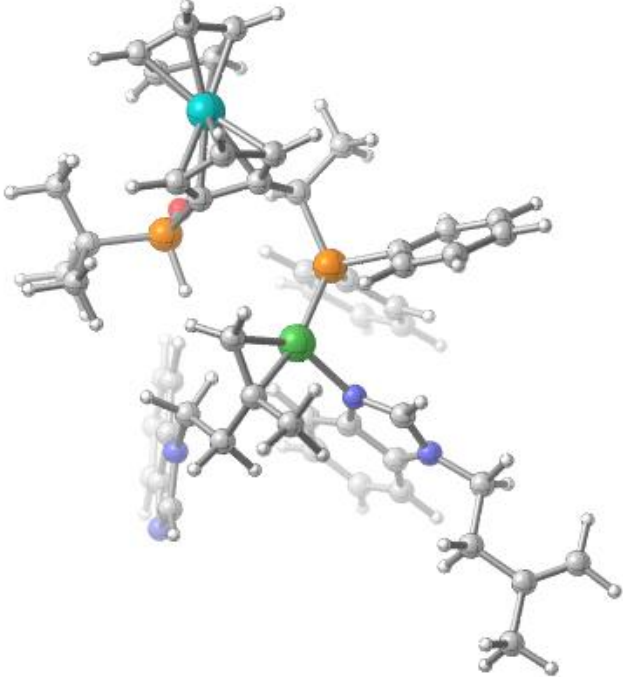   | -4.8 |
| c3-4 |  | -0.3 |
|      |  |      |

|             |                                                                                                                                                                                                                                                                                                                                                                                                                                                                          |      |
|-------------|--------------------------------------------------------------------------------------------------------------------------------------------------------------------------------------------------------------------------------------------------------------------------------------------------------------------------------------------------------------------------------------------------------------------------------------------------------------------------|------|
| <b>c4</b>   | 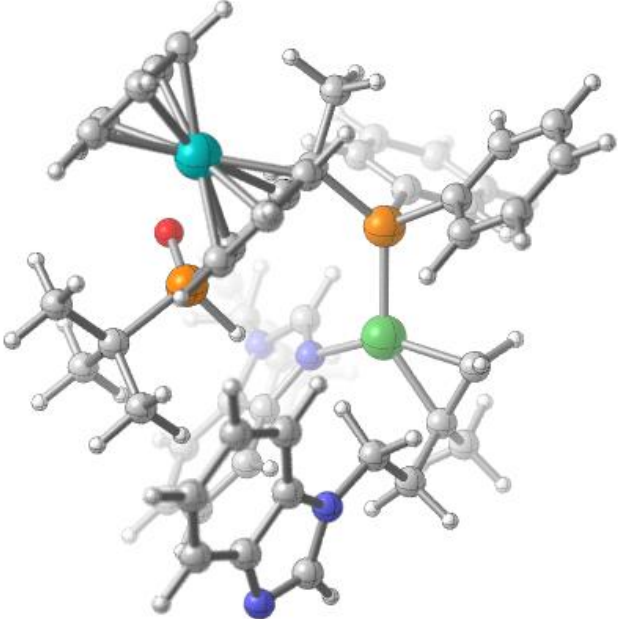 A 3D ball-and-stick model of a complex organic molecule. The structure features a central core with several substituents. A cyan atom is highlighted at the top left, an orange atom at the top center, a green atom at the bottom center, and a red atom at the top left. The molecule is shown in a perspective view with semi-transparent grey atoms for the rest of the structure. | -6.5 |
| <b>c4-2</b> |  A 3D ball-and-stick model of a complex organic molecule, similar to the one above. The structure features a central core with several substituents. A cyan atom is highlighted at the top left, an orange atom at the top center, and a green atom at the bottom center. The molecule is shown in a perspective view with semi-transparent grey atoms for the rest of the structure.  | -5.0 |

|      |                                                                                      |      |
|------|--------------------------------------------------------------------------------------|------|
| c4-3 | 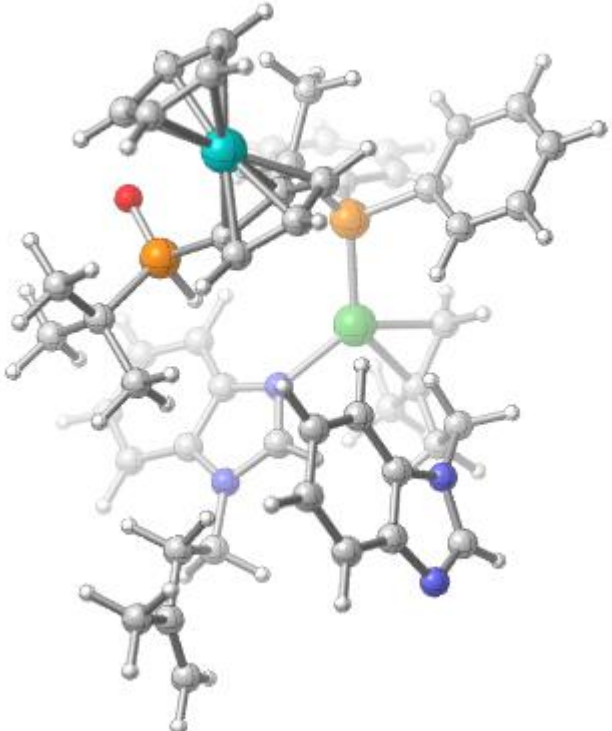    | -3.2 |
| c4-4 |  | -1.7 |
|      |   |      |

|           |                                                                                     |            |
|-----------|-------------------------------------------------------------------------------------|------------|
| <p>c5</p> | 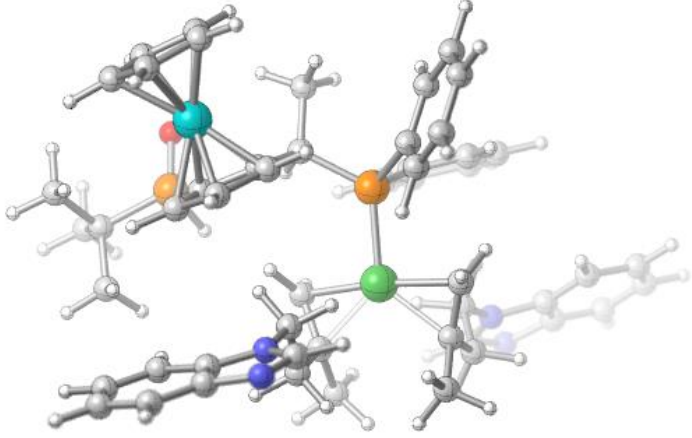  | <p>2.4</p> |
|           |    |            |
| <p>c6</p> |  | <p>0.7</p> |



|      |                                                                                     |     |
|------|-------------------------------------------------------------------------------------|-----|
| c6-2 | 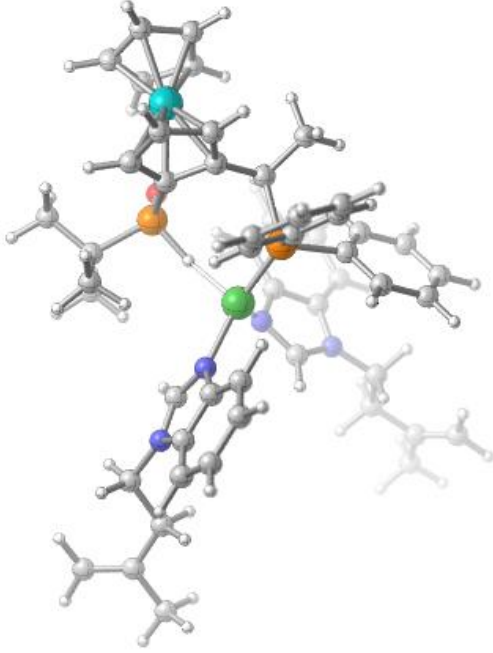   | 4.0 |
| c6-3 |  | 2.4 |
|      |  |     |

|                    |                                                                                    |            |
|--------------------|------------------------------------------------------------------------------------|------------|
| <p><b>c7</b></p>   | 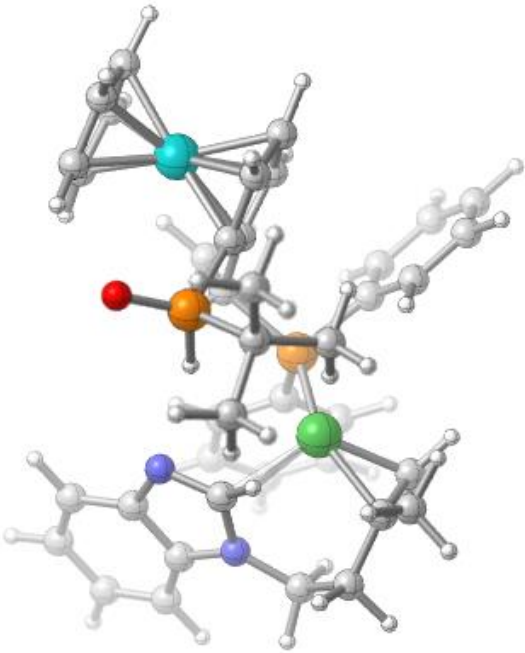  | <p>8.0</p> |
| <p><b>c7-2</b></p> |  | <p>9.3</p> |

5. Additional result for nickel(0)-promoted hydroarylation *via* the OA mechanism.

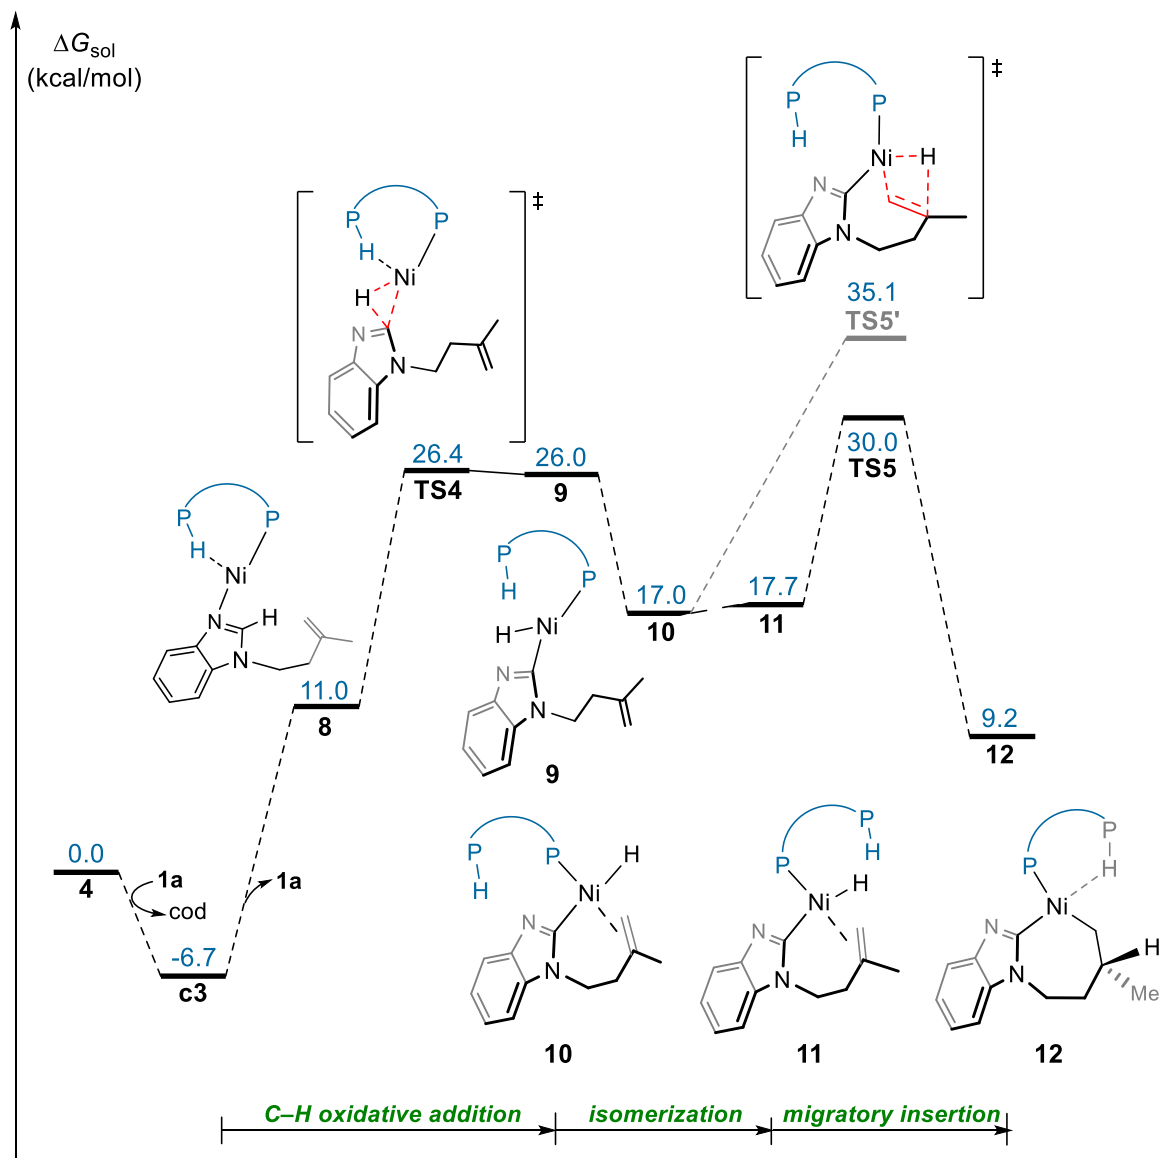

Fig. S8 The alternative migratory insertion from 10 in the OA mechanism.

## 6. The formation of the (*S*)-product via the LLHT mechanism.

The free energy profile for the formation of the (*S*)-product via the LLHT mechanism is shown in Fig. S9. The LLHT transition state **TS7'** in the formation of the (*S*)-product is 4.1 kcal/mol higher in free energy than its counterpart in the formation of the (*R*)-product. It should be noted that the orientation of the substrate in the formation of the (*S*)-product (Fig. S9) is different from that of the (*R*)-product. Besides **TS7** and **TS7'**, we also located another two possible transition states (see **TS7s** and **TS7s'** in Fig. S10), while they are less stable.

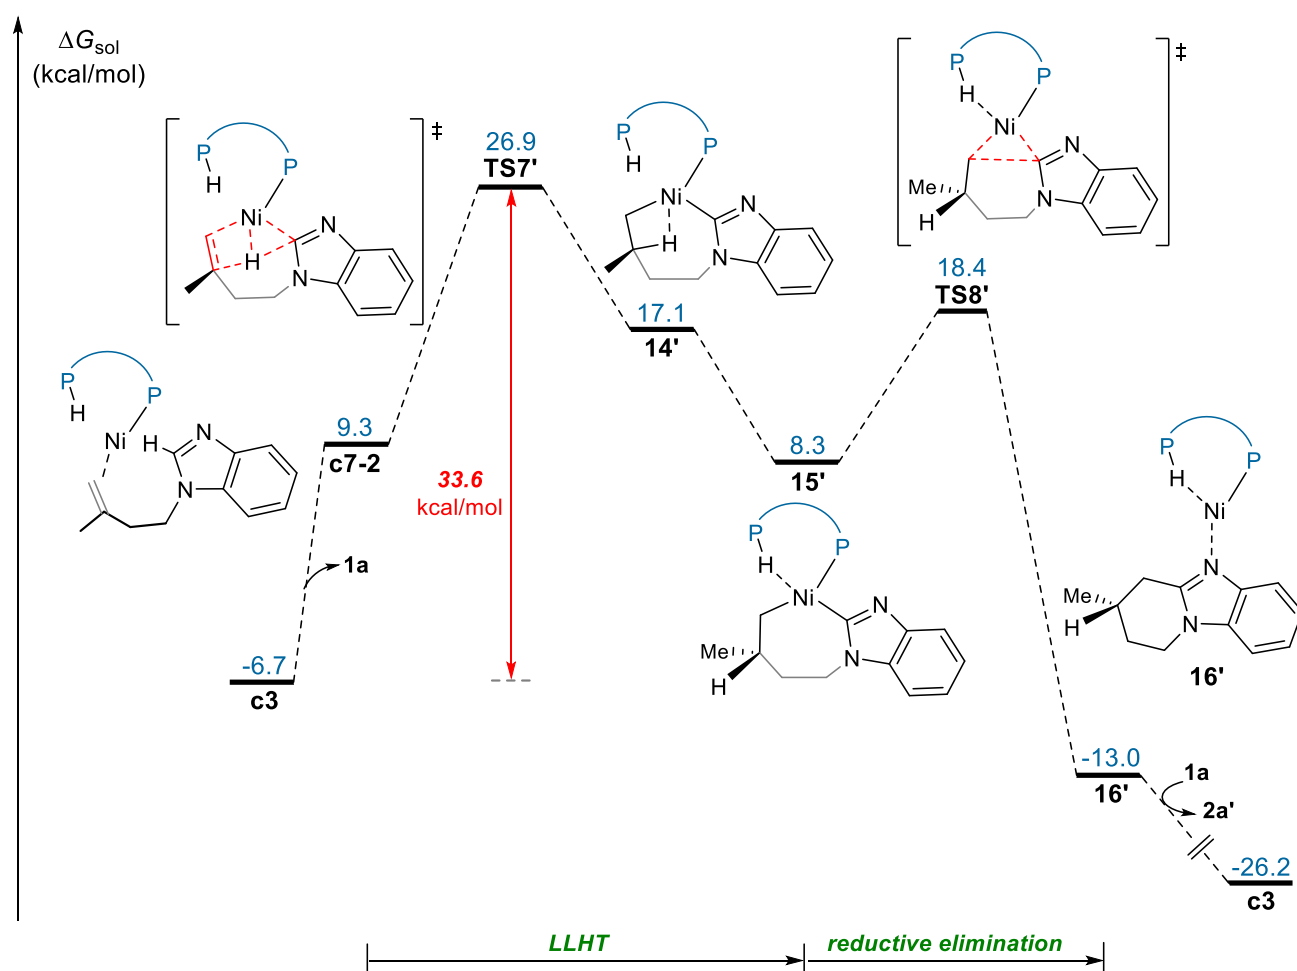

**Fig. S9** Free energy profile for the formation of the (*S*)-product via the LLHT mechanism.

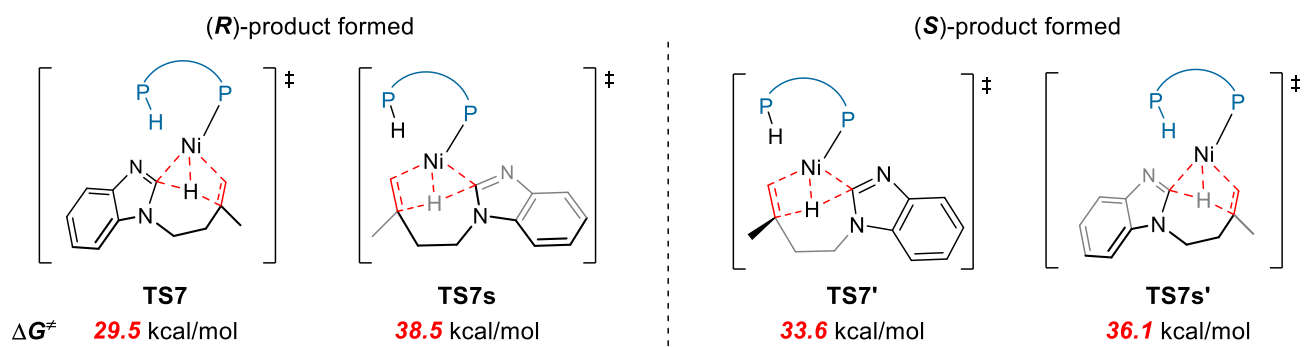

**Fig. S10** A comparison of the four possible LLHT transition states.

## 7. The formation of the (*S*)-product via the new $\sigma$ -CAM mechanism.

The free energy profile for the formation of the (*S*)-product via the new  $\sigma$ -CAM mechanism is shown in Fig. S11. It should be noted that, different from the results of (*R*)-product, the structure of intermediate **15''** in the  $\sigma$ -CAM mechanism is different from that in the LLHT mechanism (**15'** in Fig. S9) due to the different orientation of the substrate.

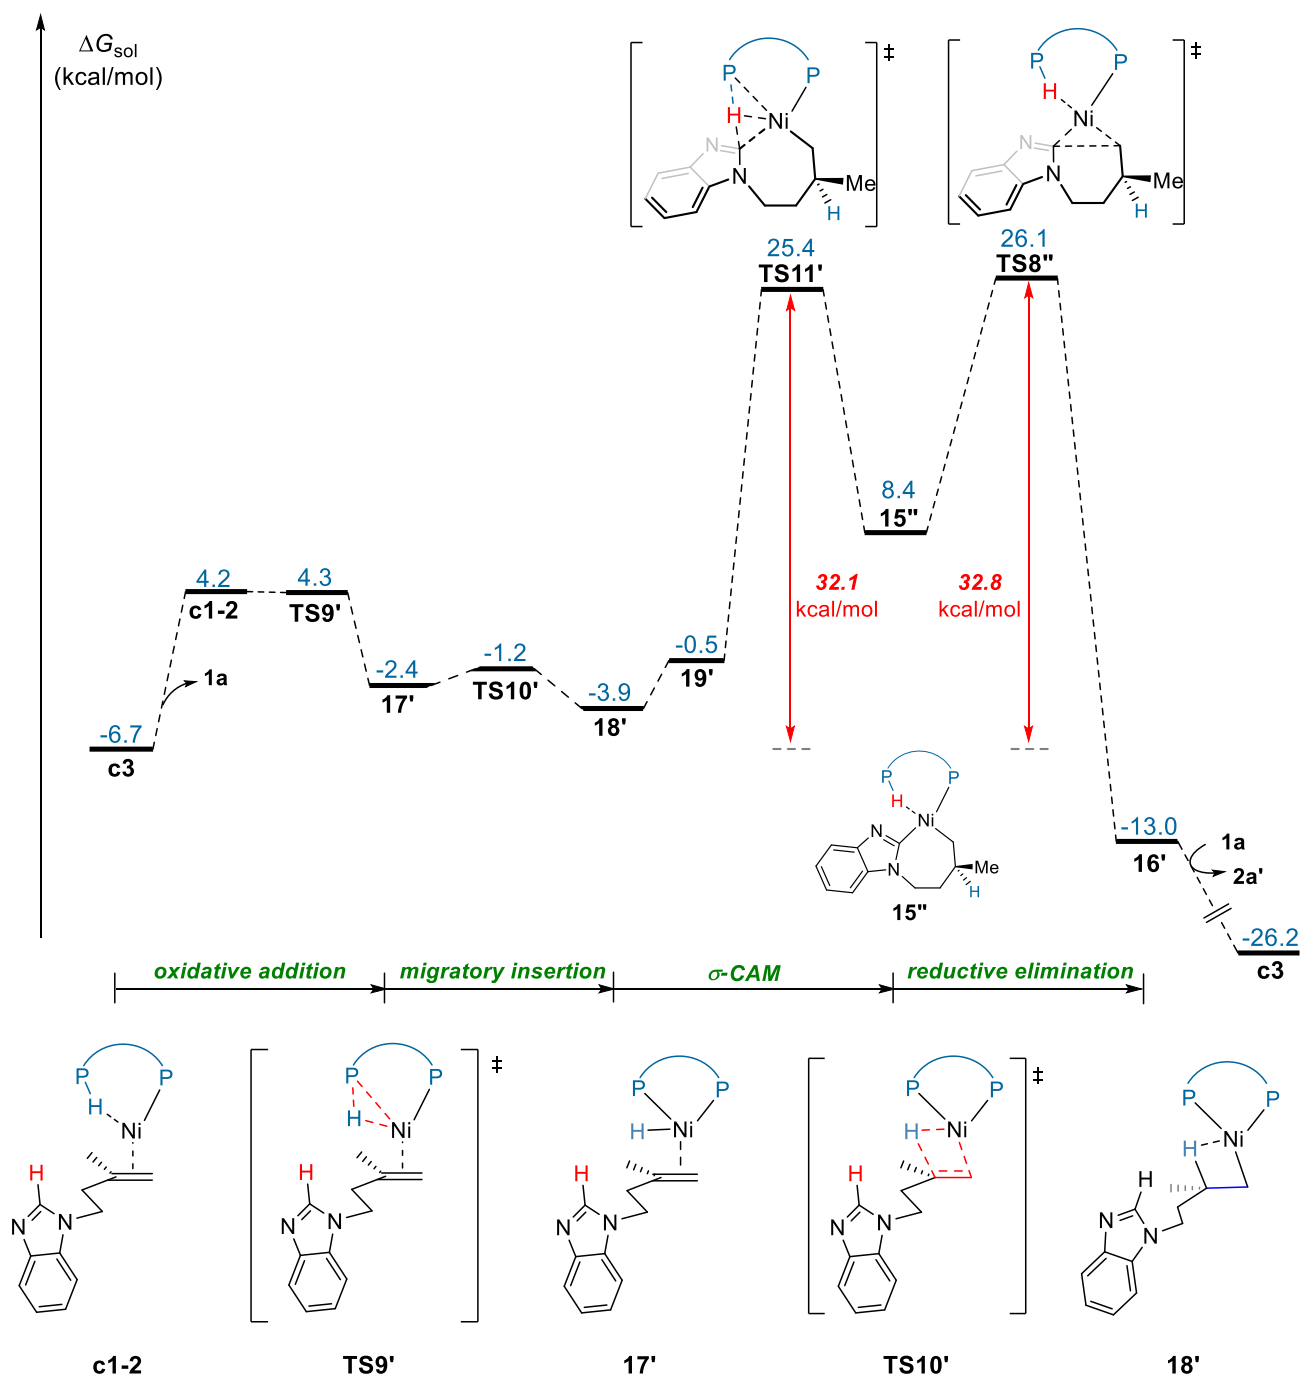

**Fig. S11** Free energy profile for the formation of the (*S*)-product via the new  $\sigma$ -CAM mechanism.

## 8. GC-FID analysis of the solution resulting from nickel-catalyzed cyclization of **1a**.

**Catalytic reaction:** In a nitrogen filled glove box a vial was loaded with a stir-bar, substrate **1a** (93.1 mg, 0.50 mmol, 1.0 equiv), [Ni(1,5-cod)<sub>2</sub>] (6.9 mg, 25 μmol, 5.0 mol %), ligand (6.3 mg, 12.5 μmol, 2.5 mol %) and toluene (1.0 mL). The resulted solution was stirred at 95 °C for 20 h. Subsequently, it was diluted with ethyl acetate (2 mL), passed through a pipette filled with silica, and subjected to a GC-FID analysis.

**Stoichiometric reaction between complex **3** and **1a**:** In a nitrogen filled glove box a vial was loaded with a stir-bar, substrate **1a** (9.3 mg, 0.05 mmol), complex **3** (34.3 mg, 0.05 mmol), and toluene (2.0 mL). The resulted solution was stirred at 95 °C for 20 h. Subsequently, it was diluted with ethyl acetate (2 mL), passed through a pipette filled with silica, and subjected to a GC-FID analysis.

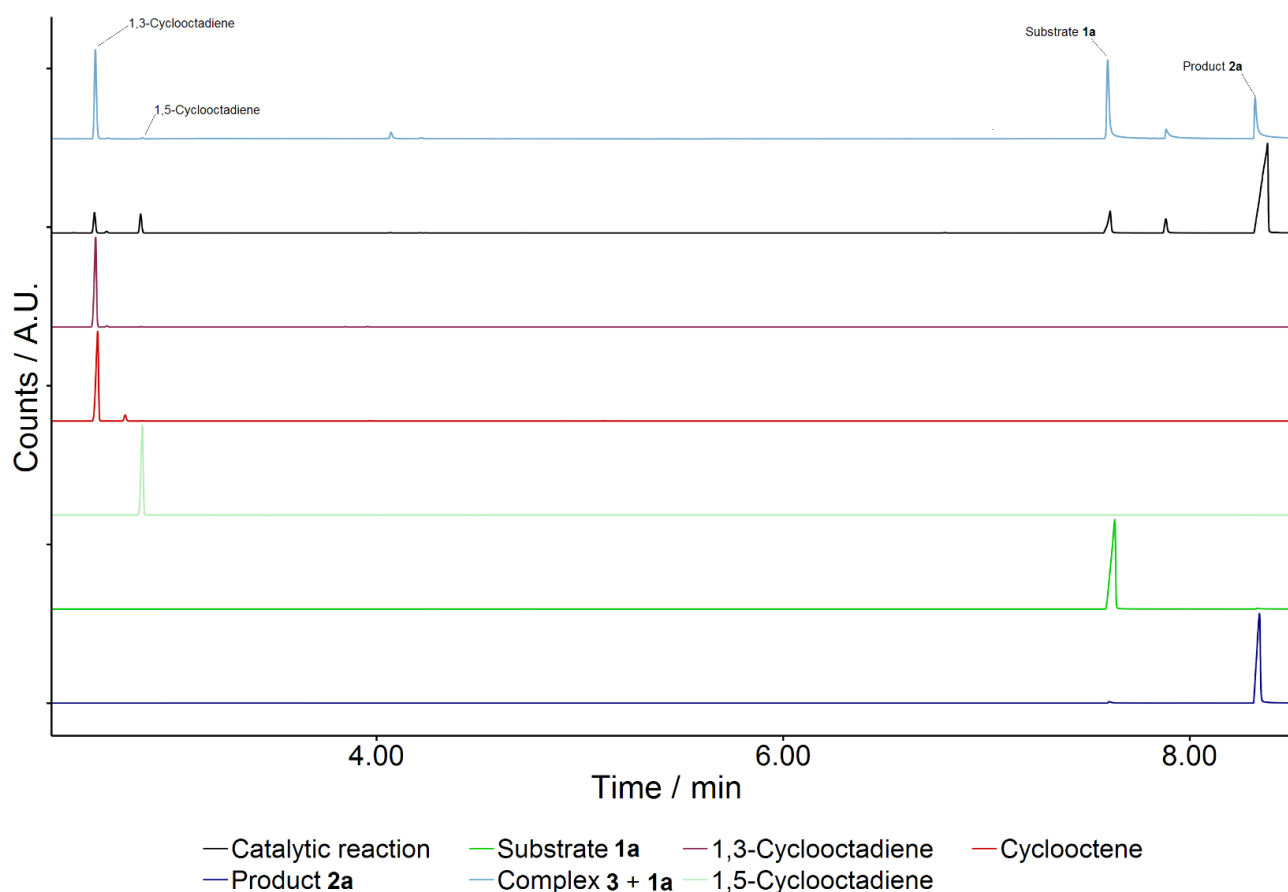

**Fig. S12** GC-FID analysis of the solution resulting from the Ni(cod)<sub>2</sub>-catalyzed cyclization of **1a** in presence of JoSPOphos (black line, second from top) and the solution resulting from the stoichiometric reaction between complex **3** and **1a** (sky blue line, top) both in toluene at 95 °C and 20 h reaction time

demonstrating formation of 1,3-cyclooctadiene by the end of catalysis. Chromatograms are normalized to the highest peak.

## References

- [1] (a) Y. Zhao and D. G. Truhlar, *J. Chem. Phys.*, 2006, **125**, 194101; (b) Y. Zhao and D. G. Truhlar, *Theor. Chem. Acc.*, 2008, **120**, 215–241.



## 9. Calculated energies and imaginary frequencies.

Table S3. Calculated energies and imaginary frequencies.

| Stationary point           | Corrected thermal correction to Gibbs free energy at B3LYP-D3(BJ)/6-31G(d,p)/LANL2DZ(Ni) (in a.u.) | Single-point energy including solvation energy at B3LYP-D3(BJ)/def2-TZVP (in a.u.) | Imaginary frequencies (in $\text{cm}^{-1}$ ) |
|----------------------------|----------------------------------------------------------------------------------------------------|------------------------------------------------------------------------------------|----------------------------------------------|
| <b>Ni(cod)<sub>2</sub></b> | 0.314824                                                                                           | -2132.827871                                                                       |                                              |
| <b>L</b>                   | 0.453915                                                                                           | -3108.669612                                                                       |                                              |
| <b>L-PA</b>                | 0.454305                                                                                           | -3108.645063                                                                       |                                              |
| <b>cod</b>                 | 0.147348                                                                                           | -312.1919693                                                                       |                                              |
| <b>coe</b>                 | 0.170998                                                                                           | -313.4234814                                                                       |                                              |
| <b>1a</b>                  | 0.194351                                                                                           | -575.4870022                                                                       |                                              |
| <b>2a</b>                  | 0.199475                                                                                           | -575.5159716                                                                       |                                              |
| <b>2a'</b>                 | 0.199639                                                                                           | -575.5233913                                                                       |                                              |
| <b>2a''</b>                | 0.175900                                                                                           | -574.2993386                                                                       |                                              |
| <b>4</b>                   | 0.623785                                                                                           | -4929.318620                                                                       |                                              |
| <b>4'</b>                  | 0.624215                                                                                           | -4929.314150                                                                       |                                              |
| <b>4''</b>                 | 0.627193                                                                                           | -4929.331201                                                                       |                                              |
| <b>TS0</b>                 | 0.449529                                                                                           | -3108.568539                                                                       | 1628.47 <i>i</i>                             |
| <b>TS0'</b>                | 0.619664                                                                                           | -4929.261917                                                                       | 701.51 <i>i</i>                              |
| <b>5</b>                   | 0.846930                                                                                           | -5504.856941                                                                       |                                              |
| <b>TS1</b>                 | 0.844207                                                                                           | -5504.806578                                                                       | 1004.65 <i>i</i>                             |
| <b>6</b>                   | 0.654990                                                                                           | -5191.404993                                                                       |                                              |
| <b>6'</b>                  | 0.845249                                                                                           | -5504.837911                                                                       |                                              |
| <b>TS2</b>                 | 0.656777                                                                                           | -5191.362793                                                                       | 352.97 <i>i</i>                              |
| <b>TS2'</b>                | 0.849254                                                                                           | -5504.797983                                                                       | 348.49 <i>i</i>                              |
| <b>7</b>                   | 0.656073                                                                                           | -5191.420247                                                                       |                                              |
| <b>7'</b>                  | 0.848407                                                                                           | -5504.851849                                                                       |                                              |
| <b>7<sub>coe</sub></b>     | 0.852264                                                                                           | -5504.857959                                                                       |                                              |
| <b>TS3</b>                 | 0.846094                                                                                           | -5504.784323                                                                       | 1376.40 <i>i</i>                             |

|              |          |              |                  |
|--------------|----------|--------------|------------------|
| <b>TS3'</b>  | 0.870911 | -5766.835151 | 961.83 <i>i</i>  |
| <b>8</b>     | 0.671781 | -5192.597182 |                  |
| <b>TS4</b>   | 0.667931 | -5192.568698 | 566.22 <i>i</i>  |
| <b>9</b>     | 0.665679 | -5192.567183 |                  |
| <b>10</b>    | 0.671813 | -5192.587513 |                  |
| <b>11</b>    | 0.667879 | -5192.582499 |                  |
| <b>TS5</b>   | 0.669666 | -5192.564758 | 739.74 <i>i</i>  |
| <b>TS5'</b>  | 0.670671 | -5192.557543 | 708.51 <i>i</i>  |
| <b>12</b>    | 0.671125 | -5192.599346 |                  |
| <b>TS6</b>   | 0.673042 | -5192.586104 | 287.92 <i>i</i>  |
| <b>13</b>    | 0.674686 | -5192.635578 |                  |
| <b>TS7</b>   | 0.670717 | -5192.577317 | 549.14 <i>i</i>  |
| <b>14</b>    | 0.673660 | -5192.588879 |                  |
| <b>15</b>    | 0.672850 | -5192.598428 |                  |
| <b>TS8</b>   | 0.671909 | -5192.576776 | 330.61 <i>i</i>  |
| <b>16</b>    | 0.673440 | -5192.638065 |                  |
| <b>TS7'</b>  | 0.668926 | -5192.568996 | 799.56 <i>i</i>  |
| <b>14'</b>   | 0.672643 | -5192.588328 |                  |
| <b>15'</b>   | 0.673266 | -5192.602868 |                  |
| <b>TS8'</b>  | 0.672667 | -5192.586183 |                  |
| <b>16'</b>   | 0.674452 | -5192.637975 |                  |
| <b>TS7s</b>  | 0.668788 | -5192.560905 | 880.11 <i>i</i>  |
| <b>TS7s'</b> | 0.668937 | -5192.564880 | 829.79 <i>i</i>  |
| <b>TS9</b>   | 0.672143 | -5192.611174 | 20.56 <i>i</i>   |
| <b>17</b>    | 0.671630 | -5192.620712 |                  |
| <b>TS10</b>  | 0.671218 | -5192.619652 | 431.53 <i>i</i>  |
| <b>18</b>    | 0.674727 | -5192.626411 |                  |
| <b>19</b>    | 0.675170 | -5192.604339 |                  |
| <b>TS11</b>  | 0.674478 | -5192.580442 | 1101.26 <i>i</i> |

|              |          |              |                  |
|--------------|----------|--------------|------------------|
| <b>TS9'</b>  | 0.674865 | -5192.610952 | 31.33 <i>i</i>   |
| <b>17'</b>   | 0.670659 | -5192.617292 |                  |
| <b>TS10'</b> | 0.671274 | -5192.616085 | 442.96 <i>i</i>  |
| <b>18'</b>   | 0.673191 | -5192.622212 |                  |
| <b>19'</b>   | 0.673831 | -5192.617455 |                  |
| <b>TS11'</b> | 0.674577 | -5192.577043 | 1073.79 <i>i</i> |
| <b>15''</b>  | 0.673260 | -5192.602759 |                  |
| <b>TS8''</b> | 0.673010 | -5192.574303 | 322.35 <i>i</i>  |
| <b>16'</b>   | 0.674452 | -5192.637975 |                  |
| <b>20</b>    | 0.624945 | -4929.326943 |                  |
| <b>TS12</b>  | 0.621488 | -4929.321226 | 442.34 <i>i</i>  |
| <b>21</b>    | 0.622151 | -4929.322294 |                  |
| <b>TS13</b>  | 0.620752 | -4929.312162 | 26.69 <i>i</i>   |
| <b>22</b>    | 0.624645 | -4929.319903 |                  |
| <b>TS14</b>  | 0.623111 | -4929.311275 | 84.18 <i>i</i>   |
| <b>23</b>    | 0.624147 | -4929.313633 |                  |
| <b>TS15</b>  | 0.623730 | -4929.312096 | 555.89 <i>i</i>  |
| <b>24</b>    | 0.629165 | -4929.326137 |                  |
| <b>25</b>    | 0.626823 | -4929.319914 |                  |
| <b>TS16</b>  | 0.622567 | -4929.312339 | 467.34 <i>i</i>  |
| <b>26</b>    | 0.622766 | -4929.313157 |                  |
| <b>27</b>    | 0.623812 | -4929.310494 |                  |
| <b>TS17</b>  | 0.622345 | -4929.310054 | 428.12 <i>i</i>  |
| <b>28</b>    | 0.625151 | -4929.318600 |                  |
| <b>29</b>    | 0.625042 | -4929.323457 |                  |
| <b>TS18</b>  | 0.623053 | -4929.316879 | 589.00 <i>i</i>  |
| <b>30</b>    | 0.621359 | -4929.320634 |                  |
| <b>TS19</b>  | 0.650767 | -5191.414669 | 674.51 <i>i</i>  |
| <b>31</b>    | 0.655803 | -5191.429614 |                  |

|             |          |              |                  |
|-------------|----------|--------------|------------------|
| <b>32</b>   | 0.848868 | -5504.848296 |                  |
| <b>TS20</b> | 0.841394 | -5504.784763 | 1103.26 <i>i</i> |
| <b>c1</b>   | 0.675172 | -5192.614440 |                  |
| <b>c1-2</b> | 0.674840 | -5192.610983 |                  |
| <b>c1-3</b> | 0.674510 | -5192.615266 |                  |
| <b>c1-4</b> | 0.673101 | -5192.615974 |                  |
| <b>c2</b>   | 0.666989 | -5192.598418 |                  |
| <b>c2-2</b> | 0.669237 | -5192.599844 |                  |
| <b>c3</b>   | 0.889496 | -5768.131671 |                  |
| <b>c3-2</b> | 0.892651 | -5768.134080 |                  |
| <b>c3-3</b> | 0.889820 | -5768.128958 |                  |
| <b>c3-4</b> | 0.894766 | -5768.126736 |                  |
| <b>c4</b>   | 0.889389 | -5768.131329 |                  |
| <b>c4-2</b> | 0.890695 | -5768.130271 |                  |
| <b>c4-3</b> | 0.890782 | -5768.127369 |                  |
| <b>c4-4</b> | 0.892152 | -5768.126337 |                  |
| <b>c5</b>   | 0.895288 | -5768.122942 |                  |
| <b>c6</b>   | 0.883639 | -5768.114053 |                  |
| <b>c6-2</b> | 0.884139 | -5768.109338 |                  |
| <b>c6-3</b> | 0.884494 | -5768.112265 |                  |
| <b>c7</b>   | 0.673661 | -5192.603737 |                  |
| <b>c7-2</b> | 0.674388 | -5192.602362 |                  |

| Stationary point | Corrected thermal correction to Gibbs free energy at B3LYP-D3(BJ)/def2-TZVP (in a.u.) | Single-point energy including solvation energy at B3LYP-D3(BJ)/def2-QZVP (in a.u.) | Imaginary frequencies (in $\text{cm}^{-1}$ ) |
|------------------|---------------------------------------------------------------------------------------|------------------------------------------------------------------------------------|----------------------------------------------|
| <b>4</b>         | 0.622114                                                                              | -4929.515508                                                                       |                                              |
| <b>4'</b>        | 0.622198                                                                              | -4929.511146                                                                       |                                              |

| Stationary point | Corrected thermal correction to Gibbs free energy at M06/def2-TZVP (in a.u.) | Single-point energy including solvation energy at M06/def2-QZVP (in a.u.) | Imaginary frequencies (in $\text{cm}^{-1}$ ) |
|------------------|------------------------------------------------------------------------------|---------------------------------------------------------------------------|----------------------------------------------|
| <b>4</b>         | 0.620923                                                                     | -4927.961966                                                              |                                              |
| <b>4'</b>        | 0.618402                                                                     | -4927.953576                                                              |                                              |

## 10. Cartesian coordinates of all optimized structures.

### Ni(cod)<sub>2</sub>

|    |             |             |             |
|----|-------------|-------------|-------------|
| H  | -3.12168500 | 2.40203300  | -0.33179100 |
| C  | -2.21864600 | 1.83388300  | -0.60655100 |
| H  | -0.75464300 | 2.36531000  | 0.95311300  |
| H  | -3.52953200 | -0.13819300 | 0.99721100  |
| C  | -1.37605400 | 1.53912000  | 0.61467100  |
| H  | -1.63482100 | 2.49576400  | -1.25707100 |
| C  | -1.52305500 | 0.47265300  | 1.48017700  |
| H  | -2.87829400 | -0.88640600 | 2.43204600  |
| C  | -2.61930600 | -0.57885300 | 1.41273600  |
| H  | -0.98320600 | 0.52908700  | 2.42122000  |
| H  | -3.52903800 | 0.13795600  | -0.99831900 |
| C  | -2.61853900 | 0.57880600  | -1.41306900 |
| H  | -2.87683700 | 0.88655900  | -2.43249200 |
| C  | -2.21859500 | -1.83397800 | 0.60670400  |
| Ni | -0.00003400 | -0.00042700 | -0.00074500 |
| H  | -3.12134300 | -2.40242400 | 0.33157900  |
| C  | -1.52203300 | -0.47258900 | -1.47992400 |
| C  | -1.37535300 | -1.53913500 | -0.61406400 |
| H  | -1.63496200 | -2.49556700 | 1.25771300  |
| H  | -0.98283800 | -0.52989800 | -2.42129900 |
| H  | -0.75470200 | -2.36582800 | -0.95274300 |
| H  | 3.12084300  | 2.40272100  | 0.33224700  |
| C  | 2.21805200  | 1.83418800  | 0.60703900  |
| H  | 0.75428400  | 2.36556200  | -0.95276400 |
| H  | 3.52950300  | -0.13738200 | -0.99735000 |
| C  | 1.37536900  | 1.53921400  | -0.61407000 |
| H  | 1.63408500  | 2.49575200  | 1.25776800  |
| C  | 1.52263200  | 0.47279000  | -1.47984400 |
| H  | 2.87811400  | -0.88599300 | -2.43189500 |
| C  | 2.61929000  | -0.57838400 | -1.41256200 |
| H  | 0.98342900  | 0.52971700  | -2.42123400 |
| H  | 3.52908700  | 0.13863700  | 0.99823800  |
| C  | 2.61857300  | 0.57914900  | 1.41330300  |
| H  | 2.87702600  | 0.88680200  | 2.43271800  |
| C  | 2.21925800  | -1.83359300 | -0.60631600 |
| H  | 3.12229000  | -2.40158500 | -0.33120300 |
| C  | 1.52247700  | -0.47257400 | 1.48025600  |
| C  | 1.37605600  | -1.53905300 | 0.61454900  |
| H  | 1.63583800  | -2.49552500 | -1.25714800 |
| H  | 0.98258100  | -0.52943800 | 2.42124700  |
| H  | 0.75499100  | -2.36557200 | 0.95284900  |

**L**

|    |             |             |             |
|----|-------------|-------------|-------------|
| Fe | 2.18927200  | -1.22065900 | -0.81673900 |
| P  | 1.58479200  | 1.71945000  | 0.77158000  |
| P  | -1.98590800 | 0.54606600  | 0.62708200  |
| O  | 1.45692300  | 2.39531600  | -0.57417300 |
| C  | 1.41316100  | -0.07695000 | 0.69711700  |
| C  | 0.34483300  | -0.71124900 | -0.04589100 |
| C  | 0.52989300  | -2.12143700 | 0.06043900  |
| H  | -0.08653200 | -2.87053500 | -0.41354800 |
| C  | 1.69433900  | -2.37263500 | 0.84122900  |
| H  | 2.11794800  | -3.34380500 | 1.05643400  |
| C  | 2.24094400  | -1.12100700 | 1.23854800  |
| H  | 3.14338700  | -0.98933000 | 1.81456900  |
| C  | -0.78138300 | -0.00079200 | -0.74156200 |
| H  | -0.37716700 | 0.93802700  | -1.13176700 |
| C  | -1.40464700 | -0.80922100 | -1.87832200 |
| H  | -1.82754500 | -1.75114900 | -1.52109300 |
| H  | -0.64778000 | -1.04455200 | -2.63286800 |
| H  | -2.20603300 | -0.24656600 | -2.36262700 |
| C  | 3.27528600  | 0.02960300  | -2.05703800 |
| H  | 3.35368700  | 1.09032100  | -1.87194100 |
| C  | 2.22196100  | -0.59633100 | -2.78597500 |
| H  | 1.40096300  | -0.08424100 | -3.26680100 |
| C  | 2.41259500  | -2.01008400 | -2.71581800 |
| H  | 1.75862800  | -2.76210900 | -3.13513300 |
| C  | 3.58616600  | -2.25770800 | -1.94142000 |
| H  | 3.97798200  | -3.22992000 | -1.67596200 |
| C  | 4.11933500  | -0.99629000 | -1.53397300 |
| H  | 4.98799900  | -0.84765300 | -0.90827800 |
| C  | -2.74138400 | -1.07580800 | 1.07056000  |
| C  | -2.20442900 | -1.73040600 | 2.19035800  |
| H  | -1.42850200 | -1.24074900 | 2.77212500  |
| C  | -2.65169600 | -2.99953100 | 2.56044100  |
| H  | -2.22159500 | -3.49223600 | 3.42760300  |
| C  | -3.65624100 | -3.62743700 | 1.82333200  |
| H  | -4.01200300 | -4.61172500 | 2.11370700  |
| C  | -4.20772000 | -2.98237100 | 0.71375500  |
| H  | -4.99137500 | -3.46572100 | 0.13716900  |
| C  | -3.75115000 | -1.71952700 | 0.33680400  |
| H  | -4.18408400 | -1.23003700 | -0.52866700 |
| C  | -3.30508800 | 1.41027200  | -0.32229600 |
| C  | -2.97710700 | 2.23898600  | -1.40862000 |
| H  | -1.95089800 | 2.30525400  | -1.75583700 |

|   |             |            |             |
|---|-------------|------------|-------------|
| C | -3.95757100 | 2.99547500 | -2.05095600 |
| H | -3.68242200 | 3.62360200 | -2.89340300 |
| C | -5.28250600 | 2.94807700 | -1.61550400 |
| H | -6.04525200 | 3.53578600 | -2.11757200 |
| C | -5.61752900 | 2.14539100 | -0.52366700 |
| H | -6.64386800 | 2.10735500 | -0.16957600 |
| C | -4.63878000 | 1.38893300 | 0.12018900  |
| H | -4.91567000 | 0.77283600 | 0.97004500  |
| C | 3.09083900  | 2.19761900 | 1.74217800  |
| C | 4.37249000  | 1.70862800 | 1.05154900  |
| H | 4.42736800  | 0.61955100 | 1.00094400  |
| H | 5.24660400  | 2.06613200 | 1.60812400  |
| H | 4.44429200  | 2.09867200 | 0.03234600  |
| C | 2.98293600  | 1.66527200 | 3.17976200  |
| H | 2.05398100  | 1.99223200 | 3.65925600  |
| H | 3.81577300  | 2.05422400 | 3.77683500  |
| H | 3.01949000  | 0.57520900 | 3.22969200  |
| C | 3.07741600  | 3.73873700 | 1.76523100  |
| H | 3.12143500  | 4.15153100 | 0.75435300  |
| H | 3.94422100  | 4.10276800 | 2.32841200  |
| H | 2.17553300  | 4.12663200 | 2.25173200  |
| H | 0.56194100  | 2.09280100 | 1.67769200  |

**L-PA**

|    |             |             |             |
|----|-------------|-------------|-------------|
| Fe | 2.17813900  | -1.27586500 | -0.73700000 |
| P  | 1.50543600  | 1.82724600  | 0.88748100  |
| P  | -2.01648700 | 0.55677200  | 0.66509000  |
| O  | 1.74446500  | 2.27086600  | -0.73478800 |
| C  | 1.44470200  | 0.01105400  | 0.70997900  |
| C  | 0.35619800  | -0.65380400 | 0.02479800  |
| C  | 0.50991100  | -2.06028800 | 0.21401100  |
| H  | -0.12776000 | -2.82430600 | -0.20520700 |
| C  | 1.67364700  | -2.28495300 | 1.00229100  |
| H  | 2.07858300  | -3.24848000 | 1.27970500  |
| C  | 2.24907900  | -1.01950200 | 1.30877400  |
| H  | 3.15668800  | -0.87473800 | 1.87264900  |
| C  | -0.78218300 | 0.02350600  | -0.68450500 |
| H  | -0.40323100 | 0.96504500  | -1.09195100 |
| C  | -1.38357600 | -0.81020400 | -1.81665700 |
| H  | -1.76976000 | -1.76384700 | -1.45045200 |
| H  | -0.62462700 | -1.02428400 | -2.57463000 |
| H  | -2.20999000 | -0.28243400 | -2.29856600 |
| C  | 3.31927700  | -0.18630800 | -2.08248100 |
| H  | 3.45917700  | 0.87866100  | -1.98437200 |



|   |             |             |             |
|---|-------------|-------------|-------------|
| C | 2.22886000  | -0.81421000 | -2.75274000 |
| H | 1.43418900  | -0.30324800 | -3.27689400 |
| C | 2.34668000  | -2.22567300 | -2.56780700 |
| H | 1.65305200  | -2.97500600 | -2.92366400 |
| C | 3.51198200  | -2.46903000 | -1.77954500 |
| H | 3.85423000  | -3.43473800 | -1.43342100 |
| C | 4.11217200  | -1.20799400 | -1.47906900 |
| H | 4.99223200  | -1.05274200 | -0.87109300 |
| C | -2.82069700 | -1.06053500 | 1.04178500  |
| C | -2.32175100 | -1.76477400 | 2.14911300  |
| H | -1.53703900 | -1.31914900 | 2.75385800  |
| C | -2.81953500 | -3.02657600 | 2.47755000  |
| H | -2.41905600 | -3.55845700 | 3.33572800  |
| C | -3.83705900 | -3.59621700 | 1.71133900  |
| H | -4.23235100 | -4.57432100 | 1.96981000  |
| C | -4.35139200 | -2.90033100 | 0.61463500  |
| H | -5.14536600 | -3.33822900 | 0.01619700  |
| C | -3.84469200 | -1.64499200 | 0.27925300  |
| H | -4.24839200 | -1.11462100 | -0.57625500 |
| C | -3.30712700 | 1.44852400  | -0.30305600 |
| C | -2.99013600 | 2.20148600  | -1.44513900 |
| H | -1.98196300 | 2.18749900  | -1.84646100 |
| C | -3.95828400 | 2.97663700  | -2.08554000 |
| H | -3.69025500 | 3.54428600  | -2.97224000 |
| C | -5.26288900 | 3.02052400  | -1.59427700 |
| H | -6.01682200 | 3.62132500  | -2.09406500 |
| C | -5.58938600 | 2.28895500  | -0.45026900 |
| H | -6.60046500 | 2.31979400  | -0.05416900 |
| C | -4.62193000 | 1.51771700  | 0.19130600  |
| H | -4.89172500 | 0.95757300  | 1.08167900  |
| C | 3.19546900  | 2.23441500  | 1.62077100  |
| C | 4.38818600  | 1.63020100  | 0.87128800  |
| H | 4.37817500  | 0.53996100  | 0.87832300  |
| H | 5.32596900  | 1.96387000  | 1.33432100  |
| H | 4.39759700  | 1.95927200  | -0.17107900 |
| C | 3.18356800  | 1.81672800  | 3.10127100  |
| H | 2.32130400  | 2.24038100  | 3.62822400  |
| H | 4.08932800  | 2.18506800  | 3.59827900  |
| H | 3.15199500  | 0.73273200  | 3.23256400  |
| C | 3.28884700  | 3.77140700  | 1.54258200  |
| H | 3.27882900  | 4.11804400  | 0.50440700  |
| H | 4.22638300  | 4.11061100  | 1.99903300  |
| H | 2.46242800  | 4.25594700  | 2.07399800  |
| H | 1.20941100  | 3.05926400  | -0.90049500 |

**cod**

|   |             |             |             |
|---|-------------|-------------|-------------|
| H | -2.71093100 | 0.33352000  | 0.69415700  |
| C | -1.92068100 | 0.01341600  | -0.00215600 |
| H | -1.78810300 | 1.82837200  | -1.20445200 |
| H | 0.64538400  | 0.71796300  | 1.59779500  |
| C | -1.19593500 | 1.23389700  | -0.50782600 |
| H | -2.45526200 | -0.42831200 | -0.85447800 |
| C | 0.03270600  | 1.68818100  | -0.23597800 |
| H | 1.77378900  | 1.88904900  | 0.97115000  |
| C | 1.08370700  | 1.09227800  | 0.67117600  |
| H | 0.34007900  | 2.59562300  | -0.75533700 |
| H | -0.64533800 | -0.71796200 | 1.59783200  |
| C | -1.08368800 | -1.09227400 | 0.67122300  |
| H | -1.77376500 | -1.88904100 | 0.97121800  |
| C | 1.92068100  | -0.01340900 | -0.00223100 |
| H | 2.71096900  | -0.33350000 | 0.69404300  |
| C | -0.03271100 | -1.68818600 | -0.23595500 |
| C | 1.19592000  | -1.23390200 | -0.50785000 |
| H | 2.45521400  | 0.42831500  | -0.85458600 |
| H | -0.34009300 | -2.59564200 | -0.75528200 |
| H | 1.78806800  | -1.82839300 | -1.20447800 |

**coe**

|   |             |             |             |
|---|-------------|-------------|-------------|
| C | -0.38752500 | 1.74987100  | -0.08196900 |
| H | -0.83643800 | 2.67243700  | -0.44880500 |
| C | 0.88118000  | 1.52347400  | -0.44683100 |
| H | 1.34987500  | 2.29360200  | -1.06164600 |
| C | 1.81411800  | 0.37358400  | -0.14987900 |
| H | 2.17552600  | -0.02334000 | -1.11154100 |
| C | 1.32160000  | -0.79259600 | 0.71843400  |
| H | 0.89295500  | -0.40188900 | 1.64423700  |
| H | 2.20227300  | -1.36848500 | 1.02892600  |
| C | 0.35238100  | -1.77354400 | 0.02858900  |
| H | 0.94249400  | -2.40801800 | -0.64624800 |
| H | -0.06254000 | -2.44871900 | 0.78923000  |
| C | -0.79319100 | -1.17430100 | -0.80083600 |
| H | -0.37273700 | -0.55115900 | -1.59782900 |
| H | -1.30845900 | -2.00052600 | -1.30738200 |
| C | -1.84472100 | -0.36028700 | -0.03925200 |
| H | -2.37298400 | -1.00947400 | 0.67171500  |
| H | -2.59690000 | -0.01863900 | -0.76187300 |
| C | -1.30390500 | 0.86624700  | 0.73267500  |
| H | -2.15906800 | 1.46167500  | 1.07119700  |

|   |             |            |            |
|---|-------------|------------|------------|
| H | -0.80414900 | 0.52584700 | 1.64178400 |
| H | 2.71052700  | 0.80199900 | 0.32264900 |

**1a**

|   |             |             |             |
|---|-------------|-------------|-------------|
| C | -1.08261400 | -0.03876100 | 0.40952600  |
| C | -1.82115100 | 0.89040000  | -0.36630700 |
| C | -3.09361700 | 0.54930200  | -0.84011100 |
| C | -3.59308900 | -0.70982400 | -0.52456500 |
| C | -2.84763700 | -1.62151800 | 0.24956100  |
| C | -1.58086100 | -1.30348400 | 0.73241400  |
| C | 0.03457700  | 1.84324500  | 0.11234300  |
| H | -3.66321900 | 1.25588600  | -1.43493900 |
| H | -4.57733100 | -0.99996900 | -0.87911600 |
| H | -3.27179800 | -2.59445900 | 0.47787500  |
| H | -1.01798000 | -2.00895000 | 1.33489900  |
| H | 0.85055200  | 2.54796300  | 0.19382900  |
| N | 0.11455900  | 0.60022000  | 0.69539300  |
| N | -1.08945900 | 2.06010700  | -0.53041800 |
| C | 1.21015700  | 0.07871600  | 1.50937400  |
| H | 1.20432100  | 0.57994200  | 2.48336500  |
| H | 1.00357700  | -0.97779400 | 1.68990900  |
| C | 2.58658900  | 0.23942500  | 0.86537000  |
| H | 2.78591100  | 1.30366400  | 0.68056400  |
| H | 3.33136800  | -0.05403100 | 1.61866200  |
| C | 4.19783900  | -0.24764400 | -1.02753800 |
| H | 4.36773400  | -0.85223800 | -1.92194400 |
| H | 4.27936100  | 0.80988400  | -1.31050200 |
| H | 5.01407800  | -0.44481000 | -0.32036500 |
| C | 2.85621000  | -0.53627100 | -0.40535900 |
| C | 2.00481100  | -1.41231100 | -0.94546400 |
| H | 2.26318800  | -1.94928600 | -1.85379100 |
| H | 1.02725700  | -1.62573200 | -0.52873400 |

**2a**

|   |             |             |             |
|---|-------------|-------------|-------------|
| H | -3.04478200 | -0.61043800 | 1.49987200  |
| C | -2.91265200 | -0.19665900 | 0.49474900  |
| C | -4.29113500 | -0.10348800 | -0.16488600 |
| C | -2.25493500 | 1.20386400  | 0.66121700  |
| C | -2.01737100 | -1.19540300 | -0.29850200 |
| H | -4.73747100 | -1.09551200 | -0.29439400 |
| H | -4.97887500 | 0.49741800  | 0.43907300  |
| H | -4.22181300 | 0.36066800  | -1.15628900 |
| C | -1.13687100 | 1.48521000  | -0.34925700 |
| H | -1.81527100 | 1.28557100  | 1.66042800  |

|   |             |             |             |
|---|-------------|-------------|-------------|
| H | -3.01491000 | 1.98801200  | 0.58111800  |
| C | -0.56049800 | -0.91036100 | -0.16509700 |
| H | -2.27869300 | -1.12141000 | -1.36414600 |
| H | -2.21695700 | -2.22590400 | 0.00132100  |
| N | -0.16574300 | 0.40514300  | -0.26310200 |
| H | -0.63384400 | 2.42796600  | -0.12440500 |
| H | -1.52791700 | 1.55092800  | -1.37218500 |
| N | 0.44342300  | -1.74486900 | 0.00556200  |
| C | 1.21242500  | 0.42713500  | -0.14007800 |
| C | 1.57650800  | -0.93661700 | 0.02471300  |
| C | 2.15176200  | 1.45825900  | -0.15274100 |
| C | 2.92461000  | -1.27749300 | 0.18166100  |
| C | 3.48719000  | 1.09334100  | 0.00696600  |
| H | 1.86241400  | 2.49597600  | -0.28537800 |
| C | 3.86735600  | -0.25289200 | 0.17080100  |
| H | 3.21500900  | -2.31552500 | 0.30822300  |
| H | 4.25163200  | 1.86436400  | 0.00192700  |
| H | 4.91939200  | -0.49339800 | 0.29032400  |

**2a'**

|   |             |             |             |
|---|-------------|-------------|-------------|
| C | 1.23844900  | 0.42685400  | 0.00893200  |
| C | 1.58554100  | -0.94801000 | 0.02155400  |
| C | 2.93394600  | -1.32116300 | -0.00011400 |
| C | 3.89297100  | -0.31209800 | -0.03810300 |
| C | 3.52914600  | 1.04826800  | -0.05571100 |
| C | 2.19260500  | 1.44353500  | -0.03422000 |
| C | -0.56324200 | -0.87111300 | 0.05931300  |
| H | 3.21291300  | -2.36991200 | 0.01110900  |
| H | 4.94591400  | -0.57668900 | -0.05574700 |
| H | 4.30626700  | 1.80579900  | -0.08781800 |
| H | 1.91373500  | 2.49223100  | -0.05129800 |
| N | -0.14584900 | 0.44541100  | 0.04506200  |
| N | 0.43615800  | -1.72867300 | 0.05105800  |
| C | -1.00716300 | 1.61868800  | -0.05061400 |
| H | -0.61165800 | 2.39635200  | 0.61007200  |
| H | -0.96878600 | 2.00425600  | -1.07750700 |
| C | -2.44240200 | 1.25639000  | 0.32935600  |
| H | -2.51509200 | 1.12751200  | 1.41698400  |
| H | -3.09508400 | 2.09283900  | 0.05930500  |
| C | -4.38207000 | -0.32307100 | -0.10135800 |
| H | -4.69473400 | -1.25537700 | -0.58336500 |
| H | -4.57903400 | -0.42103000 | 0.97281600  |
| H | -5.01603300 | 0.48262200  | -0.48595800 |
| C | -2.90407000 | -0.03586400 | -0.36101300 |

|   |             |             |             |
|---|-------------|-------------|-------------|
| C | -2.02140800 | -1.20310300 | 0.11557900  |
| H | -2.20052900 | -2.10768800 | -0.47272600 |
| H | -2.28814800 | -1.45054200 | 1.15306900  |
| H | -2.75570800 | 0.08660100  | -1.44338100 |

**2a''**

|   |             |             |             |
|---|-------------|-------------|-------------|
| C | -1.18690700 | 0.43146800  | -0.01690300 |
| C | -1.52717400 | -0.94887400 | 0.01518500  |
| C | -2.87387200 | -1.32808400 | 0.06187100  |
| C | -3.83893200 | -0.32466300 | 0.06450700  |
| C | -3.48293400 | 1.03746800  | 0.02354100  |
| C | -2.14926900 | 1.44098300  | -0.01823200 |
| C | 0.61895200  | -0.86288100 | -0.05485200 |
| H | -3.14538900 | -2.37836900 | 0.09049400  |
| H | -4.89011100 | -0.59437700 | 0.09749100  |
| H | -4.26482100 | 1.79075300  | 0.02392500  |
| H | -1.87838700 | 2.49134600  | -0.05200300 |
| N | 0.19455100  | 0.45368800  | -0.03560600 |
| N | -0.37969400 | -1.72823300 | -0.01230000 |
| C | 1.09662600  | 1.56904900  | -0.28286200 |
| H | 1.17668300  | 1.73421400  | -1.36546700 |
| H | 0.67573000  | 2.47238200  | 0.16480000  |
| C | 2.47401200  | 1.26050200  | 0.31219000  |
| H | 3.19619000  | 1.98547500  | -0.07712600 |
| H | 2.44712100  | 1.40517400  | 1.40182700  |
| C | 4.42136800  | -0.39333700 | 0.01832700  |
| H | 4.66051900  | -1.45232500 | -0.10757700 |
| H | 4.90098500  | 0.16864600  | -0.79359800 |
| H | 4.88255200  | -0.04437800 | 0.95183100  |
| C | 2.94311200  | -0.15374700 | 0.03415600  |
| C | 2.03865600  | -1.14144600 | -0.11382600 |
| H | 2.33309500  | -2.17535100 | -0.25786400 |

**4**

|    |             |             |             |
|----|-------------|-------------|-------------|
| Ni | -1.48319600 | 1.22641200  | 0.17834400  |
| Fe | 3.44456700  | -0.96505200 | -0.25018900 |
| P  | 1.24203100  | 1.64916500  | -0.32077200 |
| P  | -1.28021900 | -0.92139900 | -0.07298800 |
| O  | 1.17750300  | 1.58606000  | -1.82848400 |
| C  | 1.87637000  | 0.15402400  | 0.45840300  |
| C  | 1.42627100  | -1.17233300 | 0.09431800  |
| C  | 2.14408000  | -2.10123000 | 0.90558700  |
| H  | 2.05496900  | -3.17576000 | 0.85415600  |
| C  | 3.03607200  | -1.38240700 | 1.74865300  |

|   |             |             |             |
|---|-------------|-------------|-------------|
| H | 3.74658700  | -1.81522700 | 2.43901900  |
| C | 2.87701800  | 0.00395300  | 1.48053900  |
| H | 3.43977000  | 0.79553200  | 1.94828800  |
| C | 0.33694700  | -1.50642800 | -0.88282600 |
| H | 0.43824000  | -0.84684600 | -1.74959100 |
| C | 0.36145100  | -2.96924600 | -1.32375000 |
| H | 0.21277900  | -3.64768500 | -0.48001800 |
| H | 1.32815800  | -3.20918600 | -1.77844700 |
| H | -0.41971700 | -3.17389200 | -2.05810700 |
| C | 4.14257300  | -0.05807800 | -1.96988400 |
| H | 3.67031900  | 0.82125500  | -2.38300500 |
| C | 3.75438100  | -1.40283000 | -2.24386600 |
| H | 2.96764200  | -1.70553700 | -2.92015200 |
| C | 4.54203900  | -2.26856200 | -1.42534300 |
| H | 4.45860600  | -3.34543000 | -1.37380000 |
| C | 5.41959300  | -1.45722100 | -0.64452400 |
| H | 6.11702700  | -1.81240600 | 0.10156800  |
| C | 5.17328500  | -0.09112800 | -0.98184300 |
| H | 5.65283700  | 0.76846200  | -0.53580000 |
| C | -1.27937200 | -1.92874800 | 1.46962000  |
| C | -0.89061700 | -1.26909700 | 2.64470200  |
| H | -0.68179800 | -0.20386200 | 2.59626100  |
| C | -0.76619400 | -1.96560400 | 3.84692000  |
| H | -0.45928100 | -1.44077700 | 4.74704500  |
| C | -1.04264500 | -3.33304800 | 3.89170700  |
| H | -0.95362000 | -3.87717200 | 4.82750800  |
| C | -1.44061800 | -3.99937600 | 2.73032800  |
| H | -1.66137400 | -5.06259500 | 2.76175500  |
| C | -1.55506400 | -3.30377800 | 1.52620400  |
| H | -1.86979000 | -3.83033200 | 0.63166500  |
| C | -2.59097600 | -1.67171100 | -1.11050100 |
| C | -2.50689700 | -1.56234500 | -2.50890000 |
| H | -1.61467000 | -1.14564500 | -2.96667800 |
| C | -3.56493600 | -1.96924800 | -3.32034000 |
| H | -3.47904600 | -1.88050900 | -4.39947500 |
| C | -4.73184600 | -2.48288500 | -2.74979500 |
| H | -5.55679700 | -2.79707700 | -3.38210700 |
| C | -4.83251800 | -2.58197700 | -1.36137100 |
| H | -5.73887400 | -2.97219300 | -0.90712600 |
| C | -3.77370300 | -2.17621900 | -0.54782100 |
| H | -3.87159600 | -2.24529300 | 0.53027200  |
| C | 2.13061400  | 3.15512700  | 0.31987100  |
| C | 3.62693100  | 3.10007000  | -0.02049200 |
| H | 4.13918200  | 2.28466200  | 0.49278000  |

|   |             |            |             |
|---|-------------|------------|-------------|
| H | 4.10373500  | 4.04042000 | 0.28033600  |
| H | 3.78256000  | 2.97629700 | -1.09585900 |
| C | 1.89842100  | 3.31141000 | 1.83039600  |
| H | 0.83078100  | 3.31039200 | 2.07236800  |
| H | 2.31387600  | 4.26823000 | 2.16703900  |
| H | 2.37320300  | 2.52064300 | 2.41460400  |
| C | 1.48275000  | 4.34100400 | -0.42132900 |
| H | 1.60366100  | 4.24623400 | -1.50297500 |
| H | 1.95748800  | 5.27402000 | -0.09699700 |
| H | 0.41335500  | 4.41534400 | -0.20367900 |
| H | -0.00170900 | 1.91483400 | 0.40300600  |
| H | -2.87145500 | 4.47648700 | 1.92702500  |
| C | -2.19721000 | 3.86687600 | 1.30360200  |
| H | -1.50945100 | 2.23559200 | 2.62529200  |
| H | -4.72516600 | 2.68837200 | 0.81530900  |
| C | -2.16986800 | 2.42776500 | 1.77999700  |
| H | -1.19538600 | 4.28349300 | 1.45638100  |
| C | -3.10398800 | 1.44674200 | 1.47367200  |
| H | -5.13591500 | 0.99655900 | 0.96698600  |
| C | -4.34793500 | 1.67818200 | 0.62810800  |
| H | -3.10567300 | 0.55129200 | 2.09059300  |
| H | -3.66915100 | 4.11047100 | -0.28285300 |
| C | -2.58171500 | 4.04226200 | -0.18688600 |
| H | -2.19126200 | 5.00533800 | -0.53644900 |
| C | -4.15566300 | 1.46356100 | -0.90155100 |
| H | -4.93179600 | 2.03238300 | -1.43682100 |
| C | -2.06361200 | 2.93667100 | -1.08768400 |
| C | -2.78298000 | 1.81577500 | -1.43459200 |
| H | -4.33864400 | 0.41238800 | -1.13397400 |
| H | -1.15712400 | 3.13945600 | -1.65285300 |
| H | -2.44455000 | 1.22656400 | -2.28291300 |

#### 4'

|    |             |             |             |
|----|-------------|-------------|-------------|
| Ni | 1.54572400  | 1.06942400  | -0.64849400 |
| Fe | -3.47879500 | -0.78165200 | -0.15654500 |
| P  | -1.22837400 | 2.09538100  | -0.11374400 |
| P  | 1.32264600  | -0.89709900 | 0.22225500  |
| O  | 0.08033800  | 2.01333700  | 0.66118700  |
| C  | -1.86253200 | 0.48372000  | -0.61036600 |
| C  | -1.38786200 | -0.79832200 | -0.14441000 |
| C  | -1.90167000 | -1.78393200 | -1.03898000 |
| H  | -1.74396900 | -2.84814300 | -0.95181800 |
| C  | -2.69250600 | -1.14003700 | -2.03379500 |
| H  | -3.24788200 | -1.63228100 | -2.81980400 |

|   |             |             |             |
|---|-------------|-------------|-------------|
| C | -2.67865700 | 0.25573100  | -1.76992800 |
| H | -3.18989900 | 1.01806500  | -2.34115400 |
| C | -0.42139300 | -1.05345600 | 0.97612200  |
| H | -0.46864200 | -0.20692300 | 1.66507700  |
| C | -0.69542000 | -2.35263100 | 1.73351500  |
| H | -0.67160500 | -3.22172800 | 1.07218200  |
| H | -1.68326100 | -2.31452700 | 2.20208000  |
| H | 0.04809900  | -2.51116300 | 2.51827300  |
| C | -4.94128600 | 0.00051500  | 1.13182200  |
| H | -4.99545600 | 1.01510700  | 1.49300100  |
| C | -4.24528800 | -1.07533800 | 1.75910000  |
| H | -3.66860700 | -1.01365800 | 2.67124300  |
| C | -4.42931400 | -2.24059900 | 0.95583100  |
| H | -3.99637300 | -3.21411300 | 1.13789200  |
| C | -5.23088400 | -1.88003900 | -0.16876300 |
| H | -5.51006200 | -2.53361600 | -0.98352400 |
| C | -5.54415400 | -0.49161600 | -0.06111500 |
| H | -6.11263600 | 0.08990000  | -0.77376000 |
| C | 1.38758100  | -2.40761700 | -0.82946100 |
| C | 1.15574800  | -2.23282300 | -2.20148900 |
| H | 1.01341000  | -1.22596100 | -2.57953000 |
| C | 1.09964100  | -3.32982000 | -3.06195100 |
| H | 0.91785100  | -3.17604200 | -4.12183900 |
| C | 1.28221300  | -4.61992200 | -2.56131700 |
| H | 1.24489800  | -5.47540400 | -3.22970500 |
| C | 1.52033600  | -4.80694500 | -1.19740400 |
| H | 1.66646800  | -5.80855600 | -0.80275100 |
| C | 1.57017200  | -3.70964500 | -0.33707700 |
| H | 1.75840400  | -3.86584800 | 0.71952300  |
| C | 2.41653200  | -1.30959700 | 1.64263600  |
| C | 2.14854700  | -0.77344500 | 2.91382800  |
| H | 1.22910800  | -0.22342400 | 3.08833300  |
| C | 3.05912800  | -0.92152600 | 3.95933100  |
| H | 2.82799700  | -0.50490500 | 4.93568500  |
| C | 4.26477800  | -1.59583300 | 3.75328000  |
| H | 4.97544000  | -1.70758800 | 4.56667900  |
| C | 4.55159600  | -2.11684700 | 2.49081900  |
| H | 5.48952800  | -2.63637000 | 2.31574400  |
| C | 3.63823000  | -1.97410200 | 1.44559300  |
| H | 3.87712600  | -2.38261900 | 0.46909300  |
| C | -2.45070400 | 3.13701400  | 0.79302500  |
| C | -2.65244500 | 2.54121700  | 2.19437500  |
| H | -2.98180800 | 1.50164000  | 2.14741900  |
| H | -3.40855600 | 3.11690400  | 2.74054500  |



|   |             |             |             |
|---|-------------|-------------|-------------|
| H | -1.72074100 | 2.57513600  | 2.76542600  |
| C | -3.75764200 | 3.21386000  | -0.00835600 |
| H | -3.59399300 | 3.67082500  | -0.99102600 |
| H | -4.48218000 | 3.83940300  | 0.52563600  |
| H | -4.20283800 | 2.22932600  | -0.16040000 |
| C | -1.81915500 | 4.53727300  | 0.90517800  |
| H | -0.86678700 | 4.50294500  | 1.44065100  |
| H | -2.49788200 | 5.20244400  | 1.45096400  |
| H | -1.64115000 | 4.98049100  | -0.08098200 |
| H | -1.13391000 | 2.76896000  | -1.35379100 |
| H | 2.33851200  | 4.38097200  | -2.62552500 |
| C | 2.12095600  | 3.74840100  | -1.74758300 |
| H | 0.86324400  | 2.29211300  | -2.77420700 |
| H | 4.58086400  | 2.16020600  | -2.46521700 |
| C | 1.77245700  | 2.33196200  | -2.16657100 |
| H | 1.22654000  | 4.18645800  | -1.28202400 |
| C | 2.64145300  | 1.21448500  | -2.30287500 |
| H | 4.60797900  | 0.42828100  | -2.65279700 |
| C | 4.15200700  | 1.23427200  | -2.06513600 |
| H | 2.32709300  | 0.46112100  | -3.02501700 |
| H | 4.24379000  | 3.75831300  | -1.27786500 |
| C | 3.29582900  | 3.89025300  | -0.75136700 |
| H | 3.30017800  | 4.91996000  | -0.37271800 |
| C | 4.61078700  | 1.03723500  | -0.59706100 |
| H | 5.66577700  | 1.34158900  | -0.50977500 |
| C | 3.21365100  | 2.93525600  | 0.40961300  |
| C | 3.78383200  | 1.71680400  | 0.47101600  |
| H | 4.59444100  | -0.03435700 | -0.37354600 |
| H | 2.61591400  | 3.25818200  | 1.25962000  |
| H | 3.66982700  | 1.15362500  | 1.39407300  |

#### 4''

|    |             |             |             |
|----|-------------|-------------|-------------|
| Fe | 3.49093800  | 0.82461000  | 0.25543500  |
| P  | 0.84432400  | -1.60894400 | 0.12904900  |
| P  | -1.21471900 | 0.97687800  | 0.08184000  |
| O  | 1.17045200  | -1.57145700 | 1.79274100  |
| C  | 1.83760800  | -0.19897000 | -0.46272900 |
| C  | 1.49439400  | 1.16208700  | -0.11151100 |
| C  | 2.28955600  | 2.03612000  | -0.91348600 |
| H  | 2.28784300  | 3.11456500  | -0.86071000 |
| C  | 3.13077200  | 1.24577900  | -1.74498700 |
| H  | 3.88127500  | 1.61789800  | -2.42863800 |
| C  | 2.85653300  | -0.12387400 | -1.47199600 |
| H  | 3.35780600  | -0.95847400 | -1.93584500 |

|   |             |             |             |
|---|-------------|-------------|-------------|
| C | 0.41808800  | 1.57912700  | 0.85155900  |
| H | 0.51327800  | 0.97412100  | 1.75858700  |
| C | 0.47946200  | 3.06045800  | 1.21759800  |
| H | 0.35251300  | 3.69579700  | 0.33767200  |
| H | 1.44988300  | 3.29992000  | 1.66576800  |
| H | -0.30032700 | 3.32352100  | 1.93539000  |
| C | 4.13331900  | -0.08982000 | 1.99630500  |
| H | 3.62150900  | -0.93609100 | 2.42885500  |
| C | 3.81913600  | 1.28007400  | 2.24127700  |
| H | 3.04970700  | 1.64337700  | 2.90816700  |
| C | 4.65700300  | 2.08388900  | 1.40914600  |
| H | 4.63409200  | 3.16246700  | 1.33548900  |
| C | 5.48985200  | 1.20850500  | 0.64844900  |
| H | 6.20809000  | 1.50847100  | -0.10214700 |
| C | 5.16571500  | -0.13432200 | 1.01126700  |
| H | 5.59991300  | -1.02811300 | 0.58629000  |
| C | -1.21660200 | 1.95311200  | -1.47943900 |
| C | -0.80154100 | 1.28103400  | -2.63935100 |
| H | -0.57270800 | 0.22112800  | -2.57211100 |
| C | -0.67261400 | 1.96160300  | -3.85007400 |
| H | -0.34484300 | 1.42752500  | -4.73728600 |
| C | -0.96736000 | 3.32421700  | -3.91999400 |
| H | -0.87260200 | 3.85554100  | -4.86258300 |
| C | -1.38749200 | 4.00248700  | -2.77379900 |
| H | -1.61934100 | 5.06270500  | -2.82285300 |
| C | -1.50727400 | 3.32381300  | -1.56052900 |
| H | -1.83400300 | 3.86301600  | -0.67798800 |
| C | -2.49562800 | 1.76944900  | 1.12784500  |
| C | -2.38278400 | 1.69782800  | 2.52689900  |
| H | -1.48085100 | 1.29307300  | 2.97724500  |
| C | -3.41878200 | 2.13364700  | 3.35190000  |
| H | -3.30861800 | 2.07389900  | 4.43094500  |
| C | -4.59345500 | 2.64399600  | 2.79488000  |
| H | -5.40115300 | 2.98219900  | 3.43688300  |
| C | -4.72291500 | 2.70965700  | 1.40651400  |
| H | -5.63514900 | 3.09786200  | 0.96243200  |
| C | -3.68729200 | 2.27196200  | 0.58051100  |
| H | -3.80979700 | 2.31111500  | -0.49654500 |
| C | 1.80169000  | -3.16849100 | -0.31696000 |
| C | 3.27364200  | -3.12766400 | 0.11315600  |
| H | 3.84035700  | -2.35564400 | -0.40707500 |
| H | 3.74709900  | -4.09494700 | -0.09933000 |
| H | 3.35963900  | -2.94210200 | 1.18668300  |
| C | 1.66554200  | -3.40789700 | -1.82927000 |

|    |             |             |             |
|----|-------------|-------------|-------------|
| H  | 0.61411000  | -3.45302200 | -2.12747000 |
| H  | 2.13500400  | -4.36209100 | -2.09794800 |
| H  | 2.14388400  | -2.62540900 | -2.42333200 |
| C  | 1.10354400  | -4.31615800 | 0.43523300  |
| H  | 1.18975300  | -4.18821600 | 1.51767600  |
| H  | 1.57163900  | -5.27086700 | 0.16708900  |
| H  | 0.04381700  | -4.37496400 | 0.17972800  |
| H  | 0.30695000  | -1.51020600 | 2.22517800  |
| Ni | -1.23019000 | -1.17432700 | -0.22483300 |
| H  | -3.02159600 | -4.40243400 | -1.91868400 |
| C  | -2.33842200 | -3.85233200 | -1.25007400 |
| H  | -1.48399700 | -2.31940800 | -2.57695700 |
| H  | -4.79204700 | -2.44586800 | -0.89773900 |
| C  | -2.16691900 | -2.42802700 | -1.73564300 |
| H  | -1.37114900 | -4.35560300 | -1.34252700 |
| C  | -3.03045400 | -1.36827000 | -1.48113500 |
| H  | -5.02345600 | -0.72387200 | -1.04630600 |
| C  | -4.32070300 | -1.48132200 | -0.68080300 |
| H  | -2.95063300 | -0.50065800 | -2.13033300 |
| H  | -3.94200200 | -3.98330800 | 0.21282100  |
| C  | -2.84927800 | -4.01823600 | 0.20423300  |
| H  | -2.58041100 | -5.02373600 | 0.54829600  |
| C  | -4.19559700 | -1.29394400 | 0.85352500  |
| H  | -5.07636600 | -1.74363400 | 1.33868800  |
| C  | -2.32164600 | -3.00324700 | 1.19448800  |
| C  | -2.93323500 | -1.82818400 | 1.48878800  |
| H  | -4.24518400 | -0.22752100 | 1.07809400  |
| H  | -1.45717100 | -3.29657600 | 1.78500600  |
| H  | -2.54670200 | -1.24001400 | 2.31939700  |

**TS0**

|    |             |             |             |
|----|-------------|-------------|-------------|
| Fe | 2.19357400  | -1.24128200 | -0.77357700 |
| P  | 1.57704400  | 1.72893500  | 0.78029400  |
| P  | -1.99590000 | 0.53343500  | 0.64919200  |
| O  | 1.63020100  | 2.35729400  | -0.71831200 |
| C  | 1.41734800  | -0.06579600 | 0.71833600  |
| C  | 0.34691000  | -0.70870500 | -0.01724000 |
| C  | 0.52395700  | -2.11708300 | 0.11206600  |
| H  | -0.09414200 | -2.87089100 | -0.35217000 |
| C  | 1.68312700  | -2.36194300 | 0.90321900  |
| H  | 2.09985300  | -3.33235500 | 1.13506200  |
| C  | 2.23600600  | -1.10828700 | 1.28173800  |
| H  | 3.13664800  | -0.97267800 | 1.85930000  |
| C  | -0.78151300 | -0.00631300 | -0.71521400 |

|   |             |             |             |
|---|-------------|-------------|-------------|
| H | -0.38712000 | 0.93301300  | -1.11246200 |
| C | -1.39733800 | -0.81993900 | -1.85302900 |
| H | -1.80741300 | -1.76722100 | -1.49566400 |
| H | -0.63973200 | -1.04439700 | -2.60999300 |
| H | -2.20772900 | -0.26758300 | -2.33421300 |
| C | 3.29455600  | -0.03020900 | -2.05238900 |
| H | 3.37028700  | 1.03626400  | -1.90300800 |
| C | 2.24376500  | -0.68011600 | -2.76392100 |
| H | 1.42844600  | -0.18301800 | -3.26942000 |
| C | 2.43121100  | -2.09080700 | -2.64455300 |
| H | 1.77950700  | -2.85577500 | -3.04358100 |
| C | 3.59757800  | -2.31332100 | -1.85171700 |
| H | 3.98487800  | -3.27633500 | -1.54861000 |
| C | 4.12878400  | -1.03903900 | -1.48292000 |
| H | 4.99217200  | -0.86954000 | -0.85535100 |
| C | -2.79515200 | -1.08238700 | 1.03874100  |
| C | -2.28240900 | -1.78286300 | 2.14215200  |
| H | -1.49521200 | -1.33200000 | 2.73991400  |
| C | -2.77009000 | -3.04709300 | 2.47634400  |
| H | -2.35922900 | -3.57580700 | 3.33156100  |
| C | -3.79101500 | -3.62319800 | 1.71962100  |
| H | -4.17855500 | -4.60319200 | 1.98255100  |
| C | -4.31856800 | -2.93156100 | 0.62652200  |
| H | -5.11501000 | -3.37470300 | 0.03532500  |
| C | -3.82191600 | -1.67377300 | 0.28518400  |
| H | -4.23586400 | -1.14696000 | -0.56760100 |
| C | -3.28718200 | 1.43567000  | -0.30568600 |
| C | -2.95296100 | 2.22938600  | -1.41542500 |
| H | -1.93565000 | 2.24343100  | -1.79318000 |
| C | -3.91672200 | 3.01415900  | -2.05013300 |
| H | -3.63617200 | 3.61398600  | -2.91126100 |
| C | -5.23181300 | 3.02827700  | -1.58497500 |
| H | -5.98176900 | 3.63713000  | -2.08102800 |
| C | -5.57390400 | 2.25782100  | -0.47177500 |
| H | -6.59301700 | 2.26616500  | -0.09563100 |
| C | -4.61155600 | 1.47545700  | 0.16468800  |
| H | -4.89329900 | 0.88490800  | 1.03123200  |
| C | 3.10929000  | 2.20401800  | 1.73505900  |
| C | 4.37194200  | 1.67679700  | 1.03750100  |
| H | 4.42596700  | 0.58708000  | 1.04331400  |
| H | 5.26156200  | 2.06401400  | 1.54893900  |
| H | 4.41326200  | 2.01451600  | -0.00209000 |
| C | 2.99852900  | 1.70826400  | 3.18447700  |
| H | 2.07923900  | 2.06924200  | 3.65796700  |

|   |            |            |            |
|---|------------|------------|------------|
| H | 3.84496500 | 2.08871700 | 3.76837000 |
| H | 3.00672400 | 0.61888300 | 3.25890700 |
| C | 3.12697300 | 3.74387700 | 1.71768000 |
| H | 3.16316000 | 4.12793600 | 0.69479500 |
| H | 4.01192400 | 4.10513100 | 2.25389800 |
| H | 2.24094800 | 4.16051100 | 2.20818300 |
| H | 0.66165200 | 2.75321600 | 0.23704400 |

**TS0'**

|    |             |             |             |
|----|-------------|-------------|-------------|
| Ni | -1.17853600 | 0.74334500  | -0.02565600 |
| H  | -4.32446400 | 4.95798600  | 0.32735900  |
| C  | -4.30197500 | 3.97069100  | 0.81393800  |
| H  | -6.45031500 | 3.75424800  | 1.11272800  |
| H  | -4.28372300 | 1.95203800  | -1.57003900 |
| C  | -5.62321600 | 3.28848400  | 0.57525600  |
| H  | -4.22791400 | 4.18663000  | 1.88945800  |
| C  | -5.93083300 | 2.23133400  | -0.18559900 |
| H  | -5.62866700 | 0.86313800  | -1.78662600 |
| C  | -5.02219800 | 1.36327100  | -1.02326200 |
| H  | -6.97504500 | 1.91845400  | -0.17805600 |
| H  | -3.00978000 | 3.10792200  | -0.70727000 |
| C  | -3.01729600 | 3.24216600  | 0.37450900  |
| H  | -2.17391000 | 3.90278500  | 0.59523200  |
| C  | -4.31811500 | 0.26298400  | -0.20716600 |
| H  | -3.81555800 | -0.42073600 | -0.90098500 |
| C  | -2.78418400 | 1.93584700  | 1.10504800  |
| C  | -3.34363700 | 0.70222300  | 0.86779900  |
| H  | -5.09013600 | -0.34201500 | 0.28851600  |
| H  | -2.25734600 | 2.04073900  | 2.05419700  |
| H  | -3.17612200 | -0.04842300 | 1.63819200  |
| Fe | 3.75032200  | -0.11197500 | 0.09841900  |
| P  | 0.75652500  | 1.72715300  | -0.42702500 |
| P  | -0.78773200 | -1.37656500 | -0.13378200 |
| O  | 0.87412800  | 1.26416700  | -1.95340400 |
| C  | 1.88502200  | 0.66448300  | 0.54532300  |
| C  | 1.84482100  | -0.78547800 | 0.44501400  |
| C  | 2.72817200  | -1.31482100 | 1.43655600  |
| H  | 2.94797100  | -2.36085600 | 1.58986200  |
| C  | 3.33418900  | -0.23039100 | 2.13102700  |
| H  | 4.08702600  | -0.31132700 | 2.90310600  |
| C  | 2.81480900  | 0.98033400  | 1.59115200  |
| H  | 3.10732200  | 1.97247600  | 1.89792900  |
| C  | 1.04065700  | -1.60644200 | -0.53470200 |
| H  | 1.14464600  | -1.13045400 | -1.51350500 |

|   |             |             |             |
|---|-------------|-------------|-------------|
| C | 1.47794000  | -3.06791500 | -0.60413500 |
| H | 1.34213200  | -3.57467600 | 0.35477300  |
| H | 2.53680300  | -3.13369700 | -0.87140200 |
| H | 0.90247400  | -3.61294500 | -1.35601700 |
| C | 4.25786100  | 0.55326100  | -1.79363000 |
| H | 3.56929800  | 1.14016100  | -2.38334000 |
| C | 4.28586600  | -0.87195800 | -1.74326900 |
| H | 3.65517800  | -1.53465600 | -2.31916200 |
| C | 5.24276100  | -1.26586400 | -0.75864500 |
| H | 5.46951300  | -2.28054100 | -0.46122900 |
| C | 5.80757000  | -0.08078800 | -0.19753400 |
| H | 6.53833900  | -0.04021000 | 0.59858300  |
| C | 5.19896200  | 1.04205700  | -0.83641400 |
| H | 5.39411000  | 2.08011900  | -0.61026000 |
| C | -0.93810200 | -2.20064100 | 1.49493200  |
| C | -0.83341100 | -1.38337800 | 2.63177300  |
| H | -0.72593000 | -0.30977900 | 2.50513600  |
| C | -0.85690200 | -1.94093200 | 3.90983600  |
| H | -0.77186800 | -1.29787200 | 4.78072400  |
| C | -0.99324800 | -3.32140800 | 4.06649000  |
| H | -1.01827200 | -3.75646300 | 5.06116400  |
| C | -1.09666400 | -4.14242800 | 2.94151000  |
| H | -1.19896100 | -5.21723700 | 3.05963400  |
| C | -1.06346900 | -3.58795700 | 1.66169200  |
| H | -1.13836600 | -4.23349300 | 0.79340700  |
| C | -1.68043700 | -2.42612000 | -1.33465100 |
| C | -1.25295800 | -2.47169800 | -2.67185300 |
| H | -0.34369800 | -1.96079000 | -2.97205100 |
| C | -1.99479200 | -3.16213400 | -3.62915400 |
| H | -1.64607600 | -3.19309000 | -4.65713500 |
| C | -3.18023500 | -3.80723600 | -3.27089800 |
| H | -3.75680400 | -4.34409700 | -4.01805500 |
| C | -3.62413700 | -3.74964000 | -1.94903100 |
| H | -4.54962900 | -4.24053000 | -1.66240900 |
| C | -2.88395500 | -3.06083600 | -0.98785600 |
| H | -3.24437300 | -3.01832900 | 0.03459600  |
| C | 1.34005600  | 3.50652700  | -0.28802900 |
| C | 2.81672000  | 3.68364900  | -0.65950300 |
| H | 3.48082700  | 3.17445400  | 0.04026200  |
| H | 3.07637300  | 4.75038400  | -0.65897100 |
| H | 3.01574800  | 3.29320100  | -1.66112300 |
| C | 1.05512600  | 4.02235100  | 1.13015400  |
| H | 0.00898400  | 3.85562200  | 1.40775300  |
| H | 1.25024000  | 5.10057000  | 1.18424900  |

|   |             |            |             |
|---|-------------|------------|-------------|
| H | 1.67951700  | 3.53688900 | 1.88484000  |
| C | 0.47207700  | 4.27887400 | -1.29822500 |
| H | 0.64833500  | 3.92315700 | -2.31643500 |
| H | 0.71226000  | 5.34812700 | -1.25405400 |
| H | -0.59421900 | 4.16059000 | -1.08187300 |
| H | -0.37725300 | 0.56522200 | -1.35361700 |

5

|    |             |             |             |
|----|-------------|-------------|-------------|
| Ni | 0.08686700  | 1.04861500  | 0.14871000  |
| Fe | -4.67611400 | -0.90431300 | -0.58295500 |
| P  | -2.03166500 | 1.19314200  | 0.77336500  |
| P  | -0.10996900 | -1.23681400 | 0.31358900  |
| O  | -2.11722800 | 0.47285400  | 2.13532700  |
| C  | -2.91475000 | 0.20884700  | -0.50773300 |
| C  | -2.64835900 | -1.20846400 | -0.60288900 |
| C  | -3.22040900 | -1.69472900 | -1.81721800 |
| H  | -3.21793400 | -2.72247400 | -2.15082100 |
| C  | -3.87122000 | -0.60484900 | -2.46523600 |
| H  | -4.44646400 | -0.65965200 | -3.37950700 |
| C  | -3.67989300 | 0.56174900  | -1.66696000 |
| H  | -4.07656700 | 1.53752000  | -1.89560400 |
| C  | -1.83618500 | -1.97050500 | 0.40187600  |
| H  | -2.17047100 | -1.66075600 | 1.39414200  |
| C  | -1.90998400 | -3.48689700 | 0.26420200  |
| H  | -1.56071800 | -3.83044600 | -0.71266400 |
| H  | -2.94669800 | -3.81747400 | 0.38606800  |
| H  | -1.30527800 | -3.97513100 | 1.03380000  |
| C  | -5.68666700 | -0.71247000 | 1.21666000  |
| H  | -5.28271900 | -0.17206300 | 2.05922100  |
| C  | -5.45137700 | -2.08766900 | 0.92462000  |
| H  | -4.85910700 | -2.76712500 | 1.52175200  |
| C  | -6.08726400 | -2.39301700 | -0.31776900 |
| H  | -6.05914100 | -3.34502000 | -0.82984800 |
| C  | -6.71697300 | -1.20339400 | -0.79385700 |
| H  | -7.25049500 | -1.09700600 | -1.72837300 |
| C  | -6.46749100 | -0.16407100 | 0.15313800  |
| H  | -6.78804500 | 0.86424300  | 0.06283800  |
| C  | 0.58056900  | -2.00083400 | -1.20193200 |
| C  | 0.58732100  | -1.21062100 | -2.36243800 |
| H  | 0.26740100  | -0.17439700 | -2.30058000 |
| C  | 1.00918900  | -1.74019000 | -3.58226300 |
| H  | 1.00585000  | -1.11564200 | -4.47086500 |
| C  | 1.43000700  | -3.06937500 | -3.65723900 |
| H  | 1.75619000  | -3.48576600 | -4.60590800 |

|   |             |             |             |
|---|-------------|-------------|-------------|
| C | 1.42835300  | -3.86421100 | -2.50828300 |
| H | 1.75506800  | -4.89839300 | -2.56162400 |
| C | 1.00480300  | -3.33549100 | -1.28884400 |
| H | 1.00422700  | -3.96303300 | -0.40485700 |
| C | 0.76967600  | -1.95106600 | 1.74347900  |
| C | 0.16344900  | -1.81334100 | 3.00446800  |
| H | -0.81279800 | -1.34332800 | 3.07995900  |
| C | 0.84370900  | -2.21048800 | 4.15415400  |
| H | 0.36631700  | -2.10071800 | 5.12366900  |
| C | 2.13957400  | -2.72389900 | 4.06532800  |
| H | 2.67137000  | -3.02143400 | 4.96436500  |
| C | 2.75511800  | -2.83555800 | 2.81840900  |
| H | 3.77088200  | -3.21189900 | 2.74284300  |
| C | 2.07659200  | -2.45230500 | 1.66169200  |
| H | 2.57869800  | -2.52800500 | 0.70407500  |
| C | 1.65484000  | 2.78598400  | -2.68426700 |
| H | 1.54792400  | 2.50836200  | -3.73283500 |
| C | 0.55306800  | 2.68165000  | -1.90389800 |
| H | -0.34385500 | 2.30882300  | -2.40473500 |
| C | 0.33696300  | 2.96414100  | -0.47051700 |
| H | -0.62480200 | 3.45580700  | -0.35883000 |
| C | 1.38592800  | 3.71905200  | 0.34389400  |
| H | 2.34987300  | 3.21479300  | 0.29782600  |
| H | 1.09547600  | 3.66944700  | 1.40116100  |
| C | 1.56047900  | 5.21374100  | -0.01138100 |
| H | 0.67721400  | 5.75960500  | 0.34786400  |
| H | 2.41291200  | 5.60740100  | 0.56161000  |
| C | 1.73826300  | 5.56429000  | -1.49660500 |
| H | 0.82786000  | 5.28634000  | -2.03763100 |
| H | 1.81783900  | 6.65657000  | -1.57830600 |
| C | 2.94473600  | 4.95345600  | -2.22265600 |
| H | 3.87632900  | 5.29860200  | -1.75274300 |
| H | 2.95198500  | 5.34942400  | -3.24667500 |
| C | 2.97692800  | 3.40355200  | -2.29473600 |
| H | 3.74316300  | 3.11441600  | -3.02549300 |
| H | 3.32001800  | 3.01407000  | -1.33443000 |
| C | -2.95299800 | 2.83427600  | 0.97516000  |
| C | -4.29974800 | 2.53462100  | 1.65126800  |
| H | -4.93669100 | 1.93100000  | 1.00256800  |
| H | -4.82381600 | 3.47499300  | 1.86594600  |
| H | -4.14955100 | 1.99483000  | 2.58883200  |
| C | -3.20660000 | 3.59982000  | -0.33610500 |
| H | -2.38438400 | 3.53106500  | -1.05186500 |
| H | -3.36433600 | 4.66366400  | -0.11906200 |



|   |             |             |             |
|---|-------------|-------------|-------------|
| H | -4.11087300 | 3.24022000  | -0.83246500 |
| C | -2.10375600 | 3.67639400  | 1.94687400  |
| H | -1.86914900 | 3.10395800  | 2.84896800  |
| H | -2.66744800 | 4.56860000  | 2.24657000  |
| H | -1.16430200 | 4.00882700  | 1.50199900  |
| C | 4.16483100  | 0.42396200  | 1.12588200  |
| C | 2.80894800  | 0.71231500  | 1.39555400  |
| C | 2.35732400  | 0.90664500  | 2.70303900  |
| C | 3.29556700  | 0.79823700  | 3.72270200  |
| C | 4.64945300  | 0.51356500  | 3.44895200  |
| C | 5.11138900  | 0.32383300  | 2.14899700  |
| C | 2.98405200  | 0.44912600  | -0.75210600 |
| H | 1.31021700  | 1.11040900  | 2.89733300  |
| H | 2.98055200  | 0.92812400  | 4.75293400  |
| H | 5.35162400  | 0.44009500  | 4.27363100  |
| H | 6.15595900  | 0.10933400  | 1.94934800  |
| H | 2.75048300  | 0.40203100  | -1.80339400 |
| N | 4.24088700  | 0.25361900  | -0.25468300 |
| N | 2.10770800  | 0.72557500  | 0.19397500  |
| C | 5.44038000  | -0.02297100 | -1.04516200 |
| H | 5.68922700  | 0.87012900  | -1.62723900 |
| H | 6.25790600  | -0.19158300 | -0.34239200 |
| C | 5.29270400  | -1.21946200 | -1.98428700 |
| H | 4.43125200  | -1.06405000 | -2.64750000 |
| H | 6.16481000  | -1.21387700 | -2.65291700 |
| C | 5.05850000  | -3.71122100 | -2.35705400 |
| H | 4.95165000  | -4.68215300 | -1.86641200 |
| H | 4.19046400  | -3.55922800 | -3.00790300 |
| H | 5.94155400  | -3.75142600 | -3.00840400 |
| C | 5.17988600  | -2.59138700 | -1.35689700 |
| C | 5.20264700  | -2.82241300 | -0.04033600 |
| H | 5.13257100  | -3.83623000 | 0.34409500  |
| H | 5.29022100  | -2.03574500 | 0.69938600  |

### TS1

|    |             |             |             |
|----|-------------|-------------|-------------|
| Ni | 0.14831900  | 1.01430700  | 0.14574100  |
| Fe | -4.73416300 | -0.80126700 | -0.50534400 |
| P  | -2.03881800 | 1.27739500  | 0.63802900  |
| P  | -0.15819200 | -1.20446000 | 0.26836800  |
| O  | -2.18151700 | 0.66150600  | 2.04301600  |
| C  | -2.95433900 | 0.27397400  | -0.59447900 |
| C  | -2.72079000 | -1.14947000 | -0.63583800 |
| C  | -3.37399800 | -1.68023900 | -1.78876900 |
| H  | -3.41043100 | -2.72184200 | -2.07302700 |

|   |             |             |             |
|---|-------------|-------------|-------------|
| C | -4.04172400 | -0.60769600 | -2.44909900 |
| H | -4.66979000 | -0.69326300 | -3.32539300 |
| C | -3.78400200 | 0.59084700  | -1.71976900 |
| H | -4.18162800 | 1.56239800  | -1.96638100 |
| C | -1.90301500 | -1.87992800 | 0.38597200  |
| H | -2.22464400 | -1.53086600 | 1.36926700  |
| C | -2.00181300 | -3.40016000 | 0.30288700  |
| H | -1.67714500 | -3.78025200 | -0.66860800 |
| H | -3.04167900 | -3.70739700 | 0.45429400  |
| H | -1.39194300 | -3.87387400 | 1.07657600  |
| C | -5.61763000 | -0.46343400 | 1.33527700  |
| H | -5.14829400 | 0.14424400  | 2.09358200  |
| C | -5.39369400 | -1.85788100 | 1.14099300  |
| H | -4.75232200 | -2.48360300 | 1.74602200  |
| C | -6.11474500 | -2.26679900 | -0.02221000 |
| H | -6.11706900 | -3.25845600 | -0.45349100 |
| C | -6.78572800 | -1.12187400 | -0.54821500 |
| H | -7.38888700 | -1.09526600 | -1.44538500 |
| C | -6.47826100 | -0.00752900 | 0.28990200  |
| H | -6.81553700 | 1.00821300  | 0.14013300  |
| C | 0.47389300  | -1.96089300 | -1.26778200 |
| C | 0.46856800  | -1.16795400 | -2.42431800 |
| H | 0.18215500  | -0.12377800 | -2.34896600 |
| C | 0.83765400  | -1.70774500 | -3.65526600 |
| H | 0.83029000  | -1.08205600 | -4.54272900 |
| C | 1.22282400  | -3.04670800 | -3.74183700 |
| H | 1.51199400  | -3.46951400 | -4.69959100 |
| C | 1.23908800  | -3.84214000 | -2.59365900 |
| H | 1.54186300  | -4.88299800 | -2.65595200 |
| C | 0.86559600  | -3.30410600 | -1.36226300 |
| H | 0.88031900  | -3.92935000 | -0.47693600 |
| C | 0.70550100  | -1.96847800 | 1.67699700  |
| C | 0.09134500  | -1.89897000 | 2.93832000  |
| H | -0.88749900 | -1.44090200 | 3.03870000  |
| C | 0.76408700  | -2.35867100 | 4.06905200  |
| H | 0.28277700  | -2.29886500 | 5.04075800  |
| C | 2.05793400  | -2.87128800 | 3.95681900  |
| H | 2.58521700  | -3.21670900 | 4.84114300  |
| C | 2.67874100  | -2.92095400 | 2.70855300  |
| H | 3.69355600  | -3.29494500 | 2.61762600  |
| C | 2.00968100  | -2.47122400 | 1.57148600  |
| H | 2.51802300  | -2.48835900 | 0.61455800  |
| C | -2.86949000 | 2.97812100  | 0.67922400  |
| C | -4.31493300 | 2.79910100  | 1.17010800  |

|   |             |             |             |
|---|-------------|-------------|-------------|
| H | -4.90087400 | 2.19539500  | 0.47599900  |
| H | -4.79557400 | 3.78175000  | 1.25995900  |
| H | -4.33345000 | 2.31746300  | 2.15039900  |
| C | -2.88072600 | 3.69879900  | -0.68367700 |
| H | -2.00025300 | 3.49755500  | -1.29885200 |
| H | -2.93389500 | 4.78379600  | -0.53315400 |
| H | -3.75557800 | 3.41700900  | -1.27383700 |
| C | -2.11931800 | 3.80168400  | 1.74477900  |
| H | -2.08393000 | 3.25637200  | 2.69147200  |
| H | -2.64867600 | 4.74749000  | 1.91233400  |
| H | -1.09393000 | 4.04469900  | 1.46067600  |
| C | 0.59536900  | 3.09853400  | -0.39246000 |
| H | -0.41056400 | 3.46052500  | -0.24433300 |
| C | 0.84970200  | 2.65570000  | -1.69068300 |
| H | -0.03866300 | 2.40939900  | -2.27512600 |
| C | 2.10809800  | 2.39312600  | -2.33641700 |
| H | 1.98477000  | 2.24646400  | -3.41326700 |
| C | 3.36870400  | 3.19659800  | -1.99023000 |
| H | 3.69259400  | 2.95200100  | -0.97592200 |
| H | 4.17285900  | 2.83207600  | -2.64245800 |
| C | 3.29195900  | 4.72771000  | -2.14113600 |
| H | 3.23240300  | 4.97821400  | -3.20894100 |
| H | 4.24386000  | 5.14581100  | -1.78444600 |
| C | 2.13129700  | 5.44018500  | -1.43020100 |
| H | 1.19317200  | 5.18128400  | -1.93413000 |
| H | 2.25966800  | 6.51964000  | -1.58326500 |
| C | 1.96552200  | 5.19656400  | 0.07795700  |
| H | 2.87409400  | 5.50891600  | 0.60975700  |
| H | 1.16323700  | 5.85856200  | 0.42890400  |
| C | 1.62525700  | 3.74328300  | 0.50565100  |
| H | 1.23979000  | 3.76763300  | 1.53142300  |
| H | 2.52878500  | 3.14002800  | 0.55016600  |
| C | 4.09070000  | 0.29671800  | 1.17497700  |
| C | 2.73524300  | 0.56571800  | 1.46510600  |
| C | 2.30229800  | 0.74209200  | 2.78070600  |
| C | 3.25012000  | 0.61831100  | 3.79395900  |
| C | 4.59896700  | 0.34099600  | 3.50243200  |
| C | 5.04354400  | 0.17986100  | 2.18936500  |
| C | 2.89034500  | 0.34170000  | -0.74930800 |
| H | 1.25815500  | 0.94180900  | 2.99642900  |
| H | 2.94298600  | 0.73319800  | 4.82884700  |
| H | 5.31204900  | 0.25502600  | 4.31691200  |
| H | 6.08771100  | -0.02395600 | 1.97441400  |
| H | 2.44608900  | 1.24091000  | -1.88078000 |

|   |            |             |             |
|---|------------|-------------|-------------|
| N | 4.14681900 | 0.16939100  | -0.21157400 |
| N | 2.04527600 | 0.59849800  | 0.25815600  |
| C | 5.34423900 | -0.10151600 | -1.00012800 |
| H | 6.16542000 | -0.29769900 | -0.30693600 |
| H | 5.60591500 | 0.79932400  | -1.56577700 |
| C | 5.17616100 | -1.26889100 | -1.97108600 |
| H | 6.03033800 | -1.25392900 | -2.66320000 |
| H | 4.29121300 | -1.08208200 | -2.59158800 |
| C | 4.90291300 | -3.74721900 | -2.40624600 |
| H | 4.80045400 | -4.73133700 | -1.94074700 |
| H | 5.76417000 | -3.77787900 | -3.08688100 |
| H | 4.01688400 | -3.56576400 | -3.02488400 |
| C | 5.06669300 | -2.65633200 | -1.38007700 |
| C | 5.11775900 | -2.92556800 | -0.07140000 |
| H | 5.04506200 | -3.94890100 | 0.28747300  |
| H | 5.22874100 | -2.15802100 | 0.68539000  |

## 6

|    |             |             |             |
|----|-------------|-------------|-------------|
| Ni | -1.00090900 | 0.47356500  | -0.51976500 |
| Fe | 3.52308500  | -1.87822600 | 0.18705900  |
| P  | 0.02966600  | -1.44790900 | 0.07049300  |
| P  | 0.66080300  | 1.73062400  | 0.37159800  |
| O  | 0.08941700  | -1.70805600 | 1.57262600  |
| C  | 1.74098300  | -1.11478000 | -0.54954700 |
| C  | 2.53693400  | -0.09788800 | 0.09870200  |
| C  | 3.77924400  | 0.01750300  | -0.59413200 |
| H  | 4.59390700  | 0.67428600  | -0.32609200 |
| C  | 3.78519600  | -0.94203600 | -1.64759200 |
| H  | 4.60697200  | -1.14405100 | -2.32087300 |
| C  | 2.53765000  | -1.63258400 | -1.62579900 |
| H  | 2.27092600  | -2.43746900 | -2.29247700 |
| C  | 2.01297700  | 0.75065000  | 1.21566200  |
| H  | 1.47674500  | 0.09998700  | 1.91203900  |
| C  | 3.05673500  | 1.57717400  | 1.95689900  |
| H  | 3.59418800  | 2.25561900  | 1.29001000  |
| H  | 3.78927600  | 0.91184100  | 2.42525500  |
| H  | 2.58893500  | 2.17371600  | 2.74543000  |
| C  | 3.05578100  | -3.25747500 | 1.65217500  |
| H  | 2.02998600  | -3.43905100 | 1.93569500  |
| C  | 3.87778300  | -2.22327300 | 2.18838200  |
| H  | 3.59151400  | -1.53596900 | 2.97173200  |
| C  | 5.11195100  | -2.21591800 | 1.46853800  |
| H  | 5.92716400  | -1.51965700 | 1.60991700  |
| C  | 5.05237100  | -3.24912800 | 0.48496500  |

|   |             |             |             |
|---|-------------|-------------|-------------|
| H | 5.81761400  | -3.47663300 | -0.24438800 |
| C | 3.78267900  | -3.89338700 | 0.60014500  |
| H | 3.42223400  | -4.69794600 | -0.02438900 |
| C | 1.62034400  | 2.99646100  | -0.53301100 |
| C | 1.99076100  | 2.67775900  | -1.84929900 |
| H | 1.65324400  | 1.74303600  | -2.28391700 |
| C | 2.80488100  | 3.53647000  | -2.58707700 |
| H | 3.08480900  | 3.27392100  | -3.60283300 |
| C | 3.25734700  | 4.72793500  | -2.01797000 |
| H | 3.88493400  | 5.40229200  | -2.59283900 |
| C | 2.91015600  | 5.04573300  | -0.70349300 |
| H | 3.27345600  | 5.96368000  | -0.25117000 |
| C | 2.10523100  | 4.18214200  | 0.04020700  |
| H | 1.86811800  | 4.42704800  | 1.06895900  |
| C | -0.31084700 | 2.51943900  | 1.69960400  |
| C | -0.84189000 | 1.64008900  | 2.66123200  |
| H | -0.61759100 | 0.57744500  | 2.61269300  |
| C | -1.71038300 | 2.11913000  | 3.63919000  |
| H | -2.12047200 | 1.43007300  | 4.37079000  |
| C | -2.07162400 | 3.46803000  | 3.66182900  |
| H | -2.75278300 | 3.83663700  | 4.42306600  |
| C | -1.57111300 | 4.33781200  | 2.69179100  |
| H | -1.86286300 | 5.38404400  | 2.69376600  |
| C | -0.69818100 | 3.86702100  | 1.71007100  |
| H | -0.33624000 | 4.54821700  | 0.94857000  |
| C | -0.55329900 | -2.98572600 | -0.86247600 |
| C | 0.46115000  | -4.12270400 | -0.64748600 |
| H | 1.45545600  | -3.88807200 | -1.02280800 |
| H | 0.10514900  | -5.02023800 | -1.16819400 |
| H | 0.54700900  | -4.36579800 | 0.41438300  |
| C | -0.71773600 | -2.66728200 | -2.35257000 |
| H | -1.37934600 | -1.80924200 | -2.48933500 |
| H | -1.16415100 | -3.52289800 | -2.87388600 |
| H | 0.23165300  | -2.43834700 | -2.84250100 |
| C | -1.89404500 | -3.45373300 | -0.27037000 |
| H | -1.86110400 | -3.46616800 | 0.82119200  |
| H | -2.09737900 | -4.47274100 | -0.62192400 |
| H | -2.72633400 | -2.82611700 | -0.58166600 |
| C | -4.79683600 | -1.05336700 | -0.36213900 |
| C | -4.33346900 | -1.04721700 | 0.97831500  |
| C | -5.19660900 | -1.42475800 | 2.01421600  |
| C | -6.49983900 | -1.79063100 | 1.68546000  |
| C | -6.94656700 | -1.78580000 | 0.34974900  |
| C | -6.10154600 | -1.41842700 | -0.69796100 |

|   |             |             |             |
|---|-------------|-------------|-------------|
| C | -2.64566400 | -0.39468700 | -0.23642600 |
| H | -4.84615000 | -1.42849600 | 3.04184400  |
| H | -7.18767200 | -2.08806700 | 2.47181300  |
| H | -7.96937100 | -2.07732200 | 0.12917400  |
| H | -6.45341700 | -1.42259100 | -1.72547400 |
| N | -3.69880600 | -0.65533300 | -1.11760500 |
| N | -3.00607900 | -0.64604800 | 1.01457700  |
| C | -3.74305300 | -0.24671100 | -2.50511600 |
| H | -2.99644600 | -0.79120800 | -3.09095300 |
| H | -4.72267800 | -0.51427400 | -2.90490700 |
| C | -3.53394300 | 1.26864800  | -2.62370800 |
| H | -3.81737500 | 1.57851100  | -3.63832800 |
| H | -4.21585600 | 1.76277400  | -1.92568000 |
| C | -1.11490800 | 1.38860500  | -3.46393100 |
| H | -0.19391900 | 1.96113400  | -3.35261200 |
| H | -0.85984700 | 0.32305800  | -3.43200500 |
| H | -1.53002100 | 1.58934000  | -4.45897400 |
| C | -2.11823600 | 1.74101000  | -2.39406300 |
| C | -1.81120200 | 2.58472600  | -1.37477900 |
| H | -0.87258100 | 3.12504900  | -1.36659100 |
| H | -2.55763600 | 2.87511700  | -0.64193200 |

## 6'

|    |             |             |             |
|----|-------------|-------------|-------------|
| Ni | 0.37592900  | 1.63063800  | -0.37248300 |
| Fe | 2.75139000  | -2.86723300 | -1.13248000 |
| P  | 0.18861800  | -0.44814200 | -1.22517400 |
| P  | 1.69863700  | 0.89480600  | 1.31886500  |
| O  | -0.56191700 | -1.42340000 | -0.31949600 |
| C  | 1.96550200  | -0.95147400 | -1.28293100 |
| C  | 2.67581900  | -1.15249600 | -0.04015700 |
| C  | 4.03700200  | -1.45845100 | -0.34076900 |
| H  | 4.80882300  | -1.68370300 | 0.38061600  |
| C  | 4.17676800  | -1.49216000 | -1.75877100 |
| H  | 5.07354500  | -1.75340100 | -2.30401200 |
| C  | 2.91114100  | -1.17981100 | -2.33798500 |
| H  | 2.70798200  | -1.16357300 | -3.39702800 |
| C  | 2.04259700  | -0.94377200 | 1.30048700  |
| H  | 1.04925200  | -1.39842200 | 1.27165600  |
| C  | 2.83453700  | -1.47384100 | 2.48924700  |
| H  | 3.83027900  | -1.02882500 | 2.55425700  |
| H  | 2.95433600  | -2.55793300 | 2.39683400  |
| H  | 2.30833000  | -1.26956600 | 3.42628100  |
| C  | 1.16535800  | -4.19226100 | -1.09432900 |
| H  | 0.14527800  | -3.83961800 | -1.11618900 |

|   |             |             |             |
|---|-------------|-------------|-------------|
| C | 1.95409300  | -4.32927100 | 0.08496600  |
| H | 1.61297100  | -4.14311300 | 1.09352900  |
| C | 3.28046300  | -4.68925600 | -0.30467700 |
| H | 4.12323700  | -4.82773900 | 0.35865900  |
| C | 3.31081500  | -4.77677200 | -1.72930300 |
| H | 4.18015900  | -4.99737000 | -2.33361100 |
| C | 2.00380500  | -4.47060100 | -2.21681400 |
| H | 1.71124700  | -4.42427600 | -3.25593000 |
| C | 3.34018800  | 1.57334200  | 1.75357700  |
| C | 4.20633700  | 1.84927600  | 0.68309400  |
| H | 3.85507000  | 1.71593500  | -0.33439000 |
| C | 5.51703200  | 2.26377300  | 0.91759200  |
| H | 6.17527800  | 2.46942500  | 0.07889800  |
| C | 5.97839500  | 2.41076800  | 2.22665100  |
| H | 6.99639500  | 2.73998900  | 2.41184400  |
| C | 5.13114400  | 2.12154400  | 3.29789400  |
| H | 5.49094400  | 2.21729000  | 4.31797000  |
| C | 3.82319200  | 1.69507900  | 3.06550100  |
| H | 3.18790300  | 1.44170000  | 3.90585300  |
| C | 0.51594200  | 1.17834800  | 2.68114400  |
| C | -0.66487500 | 0.41461300  | 2.61985500  |
| H | -0.80114200 | -0.31889300 | 1.82934900  |
| C | -1.69159900 | 0.64366400  | 3.53249400  |
| H | -2.59961300 | 0.05297000  | 3.46957500  |
| C | -1.56463200 | 1.64122900  | 4.50145600  |
| H | -2.36938400 | 1.81960000  | 5.20845100  |
| C | -0.40907000 | 2.42244100  | 4.54588700  |
| H | -0.31166100 | 3.21190400  | 5.28550300  |
| C | 0.62628900  | 2.19812600  | 3.63712600  |
| H | 1.50729400  | 2.82854700  | 3.67031700  |
| C | -0.44909300 | -0.57874300 | -2.99783900 |
| C | -0.18322200 | -2.00385700 | -3.51410600 |
| H | 0.87206600  | -2.27011900 | -3.50874200 |
| H | -0.55047900 | -2.08323900 | -4.54472700 |
| H | -0.72243500 | -2.73799000 | -2.91079900 |
| C | 0.22754600  | 0.46366200  | -3.89409100 |
| H | 0.07021400  | 1.46994000  | -3.50216500 |
| H | -0.20574800 | 0.42728700  | -4.90106400 |
| H | 1.30417500  | 0.30398900  | -3.99065800 |
| C | -1.97378400 | -0.37024800 | -2.99745700 |
| H | -2.44855700 | -0.93889600 | -2.19502800 |
| H | -2.37674000 | -0.72244600 | -3.95496000 |
| H | -2.25253700 | 0.67635900  | -2.88964100 |
| C | -3.17551100 | 3.05090500  | -1.80194100 |

|   |             |             |             |
|---|-------------|-------------|-------------|
| C | -3.52498500 | 2.12398800  | -0.78759700 |
| C | -4.86548500 | 1.97581300  | -0.41169900 |
| C | -5.81996700 | 2.75977400  | -1.05582500 |
| C | -5.45673800 | 3.67940600  | -2.05842700 |
| C | -4.12698600 | 3.84091200  | -2.44892800 |
| C | -1.35788700 | 1.99718900  | -0.98937200 |
| H | -5.13985800 | 1.27101500  | 0.36572200  |
| H | -6.86640900 | 2.66259200  | -0.78124200 |
| H | -6.22685000 | 4.27575200  | -2.53903600 |
| H | -3.85683200 | 4.55294600  | -3.22320400 |
| N | -1.79453600 | 2.93167300  | -1.93119500 |
| N | -2.38309600 | 1.48779300  | -0.31970200 |
| C | -0.93693900 | 3.89006400  | -2.59404600 |
| H | -0.21262800 | 3.37417000  | -3.23054500 |
| H | -1.55616900 | 4.50859900  | -3.24600400 |
| C | -0.21984000 | 4.77107900  | -1.55957500 |
| H | 0.19684200  | 5.64578500  | -2.07533600 |
| H | -0.96381600 | 5.13233500  | -0.84391600 |
| C | 2.16923800  | 3.86070700  | -1.64739200 |
| H | 3.00686600  | 3.56255600  | -1.01722200 |
| H | 2.01334400  | 3.08202700  | -2.40381200 |
| H | 2.44837600  | 4.77518900  | -2.18442000 |
| C | 0.91862000  | 4.09005600  | -0.83748200 |
| C | 0.87076400  | 3.84055600  | 0.49634300  |
| H | 1.76917500  | 3.58122100  | 1.04299000  |
| H | -0.01817700 | 4.06301400  | 1.07837600  |
| C | -4.24724400 | -4.76194100 | 1.29739700  |
| H | -4.24247500 | -5.83824800 | 1.47021400  |
| C | -3.15370800 | -4.08954000 | 1.68293500  |
| H | -2.35324800 | -4.69049700 | 2.12036400  |
| C | -2.80350200 | -2.62398100 | 1.60829300  |
| H | -2.54580800 | -2.29247600 | 2.62823500  |
| C | -3.79888000 | -1.63364400 | 0.98909700  |
| H | -4.10607700 | -2.00172100 | 0.00663100  |
| H | -3.25218000 | -0.70816100 | 0.78053900  |
| C | -5.02693100 | -1.28427600 | 1.85291100  |
| H | -4.70893900 | -0.56008100 | 2.61619800  |
| H | -5.75933400 | -0.75369900 | 1.22871500  |
| C | -5.73199000 | -2.43560300 | 2.58622500  |
| H | -5.00989000 | -2.94467400 | 3.23440000  |
| H | -6.48593200 | -2.00243300 | 3.25716700  |
| C | -6.43040100 | -3.47910100 | 1.70698000  |
| H | -7.25095200 | -3.00346200 | 1.15254300  |
| H | -6.89477500 | -4.22450100 | 2.36627400  |



|   |             |             |             |
|---|-------------|-------------|-------------|
| C | -5.51836700 | -4.20910700 | 0.69383100  |
| H | -6.08940500 | -5.03409600 | 0.25221900  |
| H | -5.28850600 | -3.53239500 | -0.13143600 |
| H | -1.87075600 | -2.53208300 | 1.03898500  |

## TS2

|    |             |             |             |
|----|-------------|-------------|-------------|
| Ni | -0.98882200 | 0.92125900  | 0.41120000  |
| Fe | 2.46955000  | -2.80457000 | -0.62216200 |
| P  | -0.24085400 | -1.15662300 | 1.09725800  |
| P  | 1.14639500  | 1.60080400  | 0.18884700  |
| O  | 0.66952300  | -1.01730900 | 2.33293700  |
| C  | 0.77872500  | -1.60422900 | -0.37041400 |
| C  | 1.95895900  | -0.82594900 | -0.65784300 |
| C  | 2.46059400  | -1.21569300 | -1.93681100 |
| H  | 3.35126000  | -0.83277900 | -2.41403900 |
| C  | 1.62553000  | -2.25981900 | -2.43338600 |
| H  | 1.77455900  | -2.80919800 | -3.35309400 |
| C  | 0.59393400  | -2.49721000 | -1.47534100 |
| H  | -0.17522700 | -3.24891100 | -1.56177200 |
| C  | 2.45311100  | 0.24651700  | 0.25845800  |
| H  | 2.36398100  | -0.12761000 | 1.28042000  |
| C  | 3.87290700  | 0.73021500  | -0.01202700 |
| H  | 3.99718400  | 1.10870400  | -1.02908200 |
| H  | 4.57005400  | -0.10202100 | 0.12362200  |
| H  | 4.15438500  | 1.52409700  | 0.68596000  |
| C  | 2.90925100  | -3.75189100 | 1.16814200  |
| H  | 2.34658900  | -3.56809500 | 2.07052200  |
| C  | 4.02825600  | -2.98840700 | 0.72429900  |
| H  | 4.46908700  | -2.15432600 | 1.25131100  |
| C  | 4.42367700  | -3.48204800 | -0.55637800 |
| H  | 5.21810600  | -3.08552800 | -1.17374400 |
| C  | 3.54840300  | -4.55547400 | -0.90274500 |
| H  | 3.56565100  | -5.11608600 | -1.82733200 |
| C  | 2.61262000  | -4.72181700 | 0.16232300  |
| H  | 1.80289200  | -5.43666200 | 0.18597200  |
| C  | 1.58868400  | 2.40044900  | -1.39660300 |
| C  | 0.92360100  | 1.91904200  | -2.53423700 |
| H  | 0.15140100  | 1.16893500  | -2.41498400 |
| C  | 1.25805300  | 2.37865100  | -3.80713400 |
| H  | 0.73296800  | 1.99116500  | -4.67504800 |
| C  | 2.26548800  | 3.33214000  | -3.96123900 |
| H  | 2.52259500  | 3.69979000  | -4.95000200 |
| C  | 2.95147200  | 3.80026500  | -2.83951600 |
| H  | 3.75059200  | 4.52663700  | -2.95356000 |

|   |             |             |             |
|---|-------------|-------------|-------------|
| C | 2.62684900  | 3.32941800  | -1.56660100 |
| H | 3.19805300  | 3.67627400  | -0.71497600 |
| C | 1.58193300  | 2.66205200  | 1.61770400  |
| C | 1.51436400  | 2.01389600  | 2.86617500  |
| H | 1.23511100  | 0.96077400  | 2.91281900  |
| C | 1.78548700  | 2.72338500  | 4.03520100  |
| H | 1.73249600  | 2.21287200  | 4.99229600  |
| C | 2.11496500  | 4.07945800  | 3.98055800  |
| H | 2.32477600  | 4.62809200  | 4.89402600  |
| C | 2.16369800  | 4.72921500  | 2.74726400  |
| H | 2.40608100  | 5.78666000  | 2.69569200  |
| C | 1.89546700  | 4.02746300  | 1.57072700  |
| H | 1.90994700  | 4.55854000  | 0.62790000  |
| C | -1.39463900 | -2.62226300 | 1.38128900  |
| C | -0.55428500 | -3.89076200 | 1.59654700  |
| H | 0.03267700  | -4.14574300 | 0.71406500  |
| H | -1.22464900 | -4.73185000 | 1.81625000  |
| H | 0.12534400  | -3.77051100 | 2.44356300  |
| C | -2.36012500 | -2.83611700 | 0.19829600  |
| H | -2.56432900 | -1.92082100 | -0.35736900 |
| H | -3.32063300 | -3.22457500 | 0.55191000  |
| H | -1.95964700 | -3.56544600 | -0.51164700 |
| C | -2.14244800 | -2.33333000 | 2.69635500  |
| H | -1.42824200 | -2.17244900 | 3.50863800  |
| H | -2.76456500 | -3.20051400 | 2.95311100  |
| H | -2.78913000 | -1.45983700 | 2.61350200  |
| C | -4.59812400 | -0.15163600 | -0.90413500 |
| C | -4.83210300 | -0.48344600 | 0.46091600  |
| C | -6.01599300 | -1.14767800 | 0.82077200  |
| C | -6.92519900 | -1.45675500 | -0.18412700 |
| C | -6.67495000 | -1.12409000 | -1.53301200 |
| C | -5.50494900 | -0.47415600 | -1.91727000 |
| C | -2.88883100 | 0.47023300  | 0.40991500  |
| H | -6.20037300 | -1.41047200 | 1.85754800  |
| H | -7.84838000 | -1.96969100 | 0.06870900  |
| H | -7.40984600 | -1.38497000 | -2.28858400 |
| H | -5.31127600 | -0.23238100 | -2.95771900 |
| N | -3.36116700 | 0.45773900  | -0.91027100 |
| N | -3.77219300 | -0.07979300 | 1.23799900  |
| C | -2.68457300 | 1.11190600  | -2.01690800 |
| H | -1.77897200 | 0.54864500  | -2.25880400 |
| H | -3.33938900 | 1.07008300  | -2.88975700 |
| C | -2.33737400 | 2.57967800  | -1.68477000 |
| H | -1.63439800 | 2.94535900  | -2.43870300 |

|   |             |            |             |
|---|-------------|------------|-------------|
| H | -3.25514400 | 3.17847700 | -1.78847000 |
| C | -0.98812500 | 4.06910400 | -0.09569600 |
| H | -0.62389100 | 4.16912000 | 0.92751600  |
| H | -0.14672400 | 4.16538100 | -0.78519300 |
| H | -1.65507700 | 4.92358900 | -0.28778000 |
| C | -1.76331200 | 2.79032300 | -0.29314200 |
| C | -2.58988200 | 2.33690200 | 0.78012500  |
| H | -2.24792800 | 2.53788700 | 1.79657000  |
| H | -3.67173500 | 2.39783100 | 0.69882100  |

**TS2'**

|    |             |             |             |
|----|-------------|-------------|-------------|
| Ni | 1.83227300  | 0.59765400  | -0.63295000 |
| Fe | -1.70815100 | -1.71736300 | 2.39982200  |
| P  | 0.48165600  | -1.27233000 | -0.41793600 |
| P  | 0.14768200  | 1.89157900  | 0.10375600  |
| O  | -0.77671700 | -1.10651800 | -1.29607700 |
| C  | 0.00471500  | -1.14219300 | 1.35687600  |
| C  | -0.77968400 | -0.00895500 | 1.78690000  |
| C  | -0.85843900 | -0.02373500 | 3.21277300  |
| H  | -1.40489000 | 0.67891100  | 3.82488200  |
| C  | -0.16707500 | -1.18113300 | 3.67655700  |
| H  | -0.09564400 | -1.51039500 | 4.70432600  |
| C  | 0.36193200  | -1.86635000 | 2.54204000  |
| H  | 0.90420100  | -2.79785300 | 2.58155700  |
| C  | -1.33646600 | 1.00005500  | 0.83386200  |
| H  | -1.74418000 | 0.46132500  | -0.02306000 |
| C  | -2.39240800 | 1.92894600  | 1.42185200  |
| H  | -2.02968900 | 2.45979800  | 2.30484000  |
| H  | -3.26783000 | 1.34196500  | 1.71087700  |
| H  | -2.71609500 | 2.67012200  | 0.68608700  |
| C  | -2.94262500 | -2.77175600 | 1.11820800  |
| H  | -2.69121000 | -2.92994600 | 0.08143900  |
| C  | -3.62428700 | -1.62927400 | 1.63051700  |
| H  | -3.99381600 | -0.80305100 | 1.04018000  |
| C  | -3.67197000 | -1.74505900 | 3.05313600  |
| H  | -4.08759400 | -1.01694600 | 3.73630400  |
| C  | -3.02057000 | -2.96191000 | 3.41974300  |
| H  | -2.86100300 | -3.31922600 | 4.42792900  |
| C  | -2.56963800 | -3.59690700 | 2.22270600  |
| H  | -2.01512700 | -4.52263800 | 2.16744200  |
| C  | 0.55173200  | 3.03792900  | 1.47212200  |
| C  | 1.49093700  | 2.56222700  | 2.39996600  |
| H  | 1.96467900  | 1.60359200  | 2.22564800  |
| C  | 1.80076300  | 3.29502800  | 3.54465100  |

|   |             |             |             |
|---|-------------|-------------|-------------|
| H | 2.52732400  | 2.90732800  | 4.25238600  |
| C | 1.17597500  | 4.52115500  | 3.77684800  |
| H | 1.42145000  | 5.09990100  | 4.66212300  |
| C | 0.22158000  | 4.99263700  | 2.87430200  |
| H | -0.28486500 | 5.93505800  | 3.06007300  |
| C | -0.10147400 | 4.25116300  | 1.73702600  |
| H | -0.87687400 | 4.61394800  | 1.07499700  |
| C | -0.57786900 | 2.75125900  | -1.34204700 |
| C | -1.06001900 | 1.87836100  | -2.33684100 |
| H | -0.98763800 | 0.80042200  | -2.18803300 |
| C | -1.62099500 | 2.39315700  | -3.50481000 |
| H | -1.99412900 | 1.71014400  | -4.26203200 |
| C | -1.70013000 | 3.77352600  | -3.70235300 |
| H | -2.13895500 | 4.17092000  | -4.61268600 |
| C | -1.20309100 | 4.64030500  | -2.72892800 |
| H | -1.24671800 | 5.71473900  | -2.88112100 |
| C | -0.64086900 | 4.13478200  | -1.55507400 |
| H | -0.23331300 | 4.82592000  | -0.82909100 |
| C | 1.10652000  | -3.03902500 | -0.65942400 |
| C | 0.01272100  | -4.02336000 | -0.21749500 |
| H | -0.21756300 | -3.93889600 | 0.84483100  |
| H | 0.35206100  | -5.04860500 | -0.41388600 |
| H | -0.90621100 | -3.85888600 | -0.78450600 |
| C | 2.39866500  | -3.32515500 | 0.11901400  |
| H | 3.14679300  | -2.54541700 | -0.00191200 |
| H | 2.84210000  | -4.26310000 | -0.23619100 |
| H | 2.21015800  | -3.44152600 | 1.18882400  |
| C | 1.31284300  | -3.21995900 | -2.17479300 |
| H | 0.38061500  | -3.01901200 | -2.70933000 |
| H | 1.60686800  | -4.25843500 | -2.37530600 |
| H | 2.09179600  | -2.56251100 | -2.56239400 |
| C | 5.39688500  | -1.18767400 | -0.49383300 |
| C | 4.98119700  | -1.78530600 | -1.71866200 |
| C | 5.77315800  | -2.78532500 | -2.30638500 |
| C | 6.94886000  | -3.15234400 | -1.66290800 |
| C | 7.34363800  | -2.55194300 | -0.44754100 |
| C | 6.57102100  | -1.56742600 | 0.16239100  |
| C | 3.43724500  | -0.35645600 | -1.20432100 |
| H | 5.46154500  | -3.25197400 | -3.23540000 |
| H | 7.57952600  | -3.92152700 | -2.09863900 |
| H | 8.26875700  | -2.86892300 | 0.02435200  |
| H | 6.87190100  | -1.11815900 | 1.10381600  |
| N | 4.40176100  | -0.28353600 | -0.18945600 |
| N | 3.78370500  | -1.24801300 | -2.12932200 |

|   |             |             |             |
|---|-------------|-------------|-------------|
| C | 4.36405300  | 0.69644600  | 0.88237900  |
| H | 3.54072700  | 0.44521000  | 1.55722700  |
| H | 5.29208000  | 0.61860700  | 1.45226700  |
| C | 4.19584300  | 2.13168100  | 0.33488900  |
| H | 3.93803600  | 2.78939500  | 1.16991300  |
| H | 5.17230700  | 2.46734300  | -0.04654300 |
| C | 2.64250100  | 3.66437000  | -1.00667900 |
| H | 1.92491100  | 3.70025900  | -1.82734600 |
| H | 2.18764000  | 4.10480800  | -0.11711000 |
| H | 3.48730200  | 4.31212500  | -1.28616100 |
| C | 3.15998700  | 2.26651400  | -0.77023600 |
| C | 3.37696000  | 1.43441400  | -1.91086800 |
| H | 2.69727500  | 1.55210200  | -2.75587100 |
| H | 4.38941600  | 1.20762600  | -2.23376100 |
| C | -5.47456700 | 0.76466800  | -0.57935200 |
| H | -5.60131400 | 1.74846500  | -0.12759400 |
| C | -4.38931100 | 0.59803000  | -1.35029900 |
| H | -3.72640300 | 1.45921600  | -1.43808300 |
| C | -3.88911800 | -0.59190900 | -2.13053500 |
| H | -3.73921600 | -0.26329000 | -3.17189100 |
| C | -4.70660600 | -1.89143900 | -2.13103600 |
| H | -4.92202300 | -2.19052700 | -1.10317500 |
| H | -4.05877800 | -2.68276700 | -2.52892400 |
| C | -5.99234100 | -1.87666900 | -2.98078600 |
| H | -5.69813100 | -1.94928800 | -4.03663800 |
| H | -6.56836300 | -2.78738100 | -2.76570200 |
| C | -6.90919600 | -0.65052200 | -2.85101400 |
| H | -6.34659500 | 0.24721300  | -3.13042600 |
| H | -7.71038200 | -0.74789100 | -3.59528800 |
| C | -7.56300800 | -0.41854900 | -1.48398700 |
| H | -8.22984700 | -1.25772800 | -1.24432400 |
| H | -8.20235700 | 0.47063800  | -1.56132900 |
| C | -6.58348200 | -0.22436600 | -0.30195100 |
| H | -7.15789300 | 0.12125900  | 0.56526100  |
| H | -6.17152700 | -1.19360700 | -0.01366300 |
| H | -2.87657600 | -0.81919700 | -1.76978100 |

7

|    |             |             |             |
|----|-------------|-------------|-------------|
| Fe | -2.84710100 | -2.61800900 | 0.70429600  |
| P  | -0.29260700 | -1.18201700 | -1.22784500 |
| P  | -1.12285900 | 1.68632800  | 0.03171700  |
| O  | -1.36367200 | -1.11315100 | -2.33584700 |
| C  | -1.07636200 | -1.60625400 | 0.38210100  |
| C  | -2.09636800 | -0.71835000 | 0.88973400  |

|   |             |             |             |
|---|-------------|-------------|-------------|
| C | -2.51373000 | -1.19097700 | 2.17093400  |
| H | -3.29020900 | -0.75866800 | 2.78564300  |
| C | -1.77592600 | -2.37562600 | 2.46334900  |
| H | -1.89505200 | -2.99859200 | 3.33934800  |
| C | -0.89361500 | -2.63039900 | 1.37094700  |
| H | -0.23709700 | -3.48306900 | 1.29661300  |
| C | -2.57003900 | 0.48578900  | 0.13683800  |
| H | -2.70271200 | 0.18435700  | -0.90573300 |
| C | -3.85445600 | 1.11266100  | 0.66752900  |
| H | -3.75210400 | 1.44502900  | 1.70338500  |
| H | -4.66256300 | 0.37595300  | 0.62756300  |
| H | -4.14956400 | 1.97264000  | 0.05918100  |
| C | -3.44951000 | -3.30755000 | -1.14724800 |
| H | -2.87773800 | -3.05851100 | -2.02950300 |
| C | -4.46113700 | -2.48309500 | -0.57099700 |
| C | -4.86705200 | -3.07089000 | 0.66661900  |
| C | -4.10250000 | -4.26193600 | 0.85751000  |
| H | -4.14873400 | -4.91586500 | 1.71751000  |
| C | -3.22801000 | -4.40703500 | -0.26333000 |
| H | -2.49582300 | -5.19086000 | -0.39729700 |
| C | -1.16246400 | 2.51579900  | 1.65588900  |
| C | -0.35048200 | 1.96325400  | 2.65836400  |
| H | 0.30133100  | 1.13267100  | 2.41212600  |
| C | -0.38942700 | 2.45950100  | 3.96085100  |
| H | 0.24343200  | 2.01869600  | 4.72511700  |
| C | -1.23996000 | 3.51970200  | 4.27691400  |
| H | -1.26667800 | 3.91406400  | 5.28817000  |
| C | -2.06648500 | 4.06397200  | 3.29200500  |
| H | -2.74322800 | 4.87689700  | 3.53735500  |
| C | -2.03926400 | 3.55957800  | 1.99178000  |
| H | -2.71270000 | 3.96982500  | 1.24912800  |
| C | -1.62388900 | 2.82984600  | -1.30167500 |
| C | -1.87777400 | 2.21971400  | -2.54561700 |
| H | -1.80973900 | 1.13644600  | -2.64721500 |
| C | -2.18108700 | 3.00539000  | -3.65599000 |
| H | -2.37720900 | 2.52649400  | -4.61073700 |
| C | -2.22390300 | 4.39772100  | -3.54659700 |
| H | -2.45971000 | 5.00570800  | -4.41494500 |
| C | -1.95030400 | 5.00499700  | -2.32118300 |
| H | -1.96625400 | 6.08724200  | -2.23239100 |
| C | -1.64609900 | 4.22670900  | -1.20285400 |
| H | -1.40886900 | 4.71587000  | -0.26602100 |
| C | 0.93105600  | -2.56861400 | -1.58308000 |
| C | 0.18549500  | -3.90303500 | -1.73049700 |

|    |             |             |             |
|----|-------------|-------------|-------------|
| H  | -0.32795100 | -4.19214300 | -0.81150700 |
| H  | 0.89221600  | -4.70128500 | -1.99092300 |
| H  | -0.56137900 | -3.83970900 | -2.52697600 |
| C  | 2.00068700  | -2.63821700 | -0.48393100 |
| H  | 2.43948500  | -1.65543200 | -0.29213500 |
| H  | 2.81830800  | -3.30048700 | -0.79210900 |
| H  | 1.60792400  | -3.01486300 | 0.46221000  |
| C  | 1.60210000  | -2.22626100 | -2.92460600 |
| H  | 0.85680800  | -2.04260600 | -3.70380800 |
| H  | 2.23756100  | -3.06098700 | -3.24355500 |
| H  | 2.24821800  | -1.34599700 | -2.84777600 |
| Ni | 0.69953000  | 0.78636800  | -0.70228300 |
| C  | 5.03182000  | -0.42035000 | 0.86278800  |
| C  | 5.51424000  | -0.80062000 | -0.41806900 |
| C  | 6.61808600  | -1.65566500 | -0.51747600 |
| C  | 7.20225600  | -2.10874200 | 0.66208700  |
| C  | 6.70866100  | -1.72211900 | 1.92443500  |
| C  | 5.61363600  | -0.86947500 | 2.04875100  |
| C  | 3.83544500  | 0.49066200  | -0.76446000 |
| H  | 6.99530600  | -1.95329400 | -1.49058700 |
| H  | 8.05691900  | -2.77667600 | 0.61259400  |
| H  | 7.19064600  | -2.10026900 | 2.82090400  |
| H  | 5.23144500  | -0.57774200 | 3.02179700  |
| N  | 3.95993100  | 0.41673500  | 0.60253800  |
| N  | 4.73783900  | -0.21656600 | -1.41251800 |
| C  | 3.06302800  | 1.09297500  | 1.52973100  |
| H  | 2.21160500  | 0.43654700  | 1.74869000  |
| H  | 3.60263000  | 1.27347400  | 2.46278700  |
| C  | 2.59556300  | 2.40680000  | 0.90274800  |
| H  | 1.86341400  | 2.87546300  | 1.56587000  |
| H  | 3.45991700  | 3.08942500  | 0.85573800  |
| C  | 1.70299300  | 3.55979200  | -1.17018800 |
| H  | 1.19853000  | 3.41967200  | -2.13035500 |
| H  | 1.05694200  | 4.18410700  | -0.54655800 |
| H  | 2.62683000  | 4.13088600  | -1.35480700 |
| C  | 2.00579800  | 2.24135900  | -0.49106000 |
| C  | 2.68774300  | 1.22575700  | -1.35913500 |
| H  | 1.94679600  | 0.32806400  | -1.65410900 |
| H  | 2.91517400  | 1.57124000  | -2.36991500 |
| H  | -5.59469800 | -2.66561200 | 1.35646500  |
| H  | -4.81924300 | -1.54942600 | -0.98189000 |

7'

|    |             |             |             |
|----|-------------|-------------|-------------|
| Fe | -1.82632100 | -1.46048200 | -2.92792300 |
|----|-------------|-------------|-------------|

|   |             |             |             |
|---|-------------|-------------|-------------|
| P | -0.64106900 | 0.54634200  | -0.28360800 |
| P | 0.92938100  | -2.05868000 | 0.82147000  |
| O | -1.94169000 | 0.14257800  | 0.44073400  |
| C | -0.41014600 | -0.49203400 | -1.78193500 |
| C | -0.33267700 | -1.92348000 | -1.60170300 |
| C | -0.04946300 | -2.52470900 | -2.86539400 |
| H | 0.02929300  | -3.58455200 | -3.06107600 |
| C | 0.03467600  | -1.48505900 | -3.83782800 |
| H | 0.18855100  | -1.61990500 | -4.89988400 |
| C | -0.18269900 | -0.23896100 | -3.17625700 |
| H | -0.21848100 | 0.72130900  | -3.66620300 |
| C | -0.51359700 | -2.58477400 | -0.27098700 |
| H | -1.36353500 | -2.10240000 | 0.21889000  |
| C | -0.73601800 | -4.09190500 | -0.32628000 |
| H | 0.09743000  | -4.61617500 | -0.79995700 |
| H | -1.64065200 | -4.30309500 | -0.90488300 |
| H | -0.87309300 | -4.50360900 | 0.67782600  |
| C | -3.66319700 | -0.76611500 | -2.28547800 |
| H | -3.75374600 | -0.04692800 | -1.48632600 |
| C | -3.58124800 | -2.18014400 | -2.11726700 |
| C | -3.35699900 | -2.77084900 | -3.39888700 |
| C | -3.29867900 | -1.71800100 | -4.36239100 |
| H | -3.10640400 | -1.83493100 | -5.42014000 |
| C | -3.48984800 | -0.48085100 | -3.67331200 |
| H | -3.46692900 | 0.50373300  | -4.11887700 |
| C | 2.26304900  | -3.19620300 | 0.31355700  |
| C | 3.13962700  | -2.73469000 | -0.68080200 |
| H | 3.03838100  | -1.72003600 | -1.04862900 |
| C | 4.12144700  | -3.57206000 | -1.20932600 |
| H | 4.78996900  | -3.19953600 | -1.97953900 |
| C | 4.24181900  | -4.88330400 | -0.74748200 |
| H | 5.01037100  | -5.53518400 | -1.15157500 |
| C | 3.36224200  | -5.35923800 | 0.22670700  |
| H | 3.43917700  | -6.38442800 | 0.57609200  |
| C | 2.37093400  | -4.52728200 | 0.74686400  |
| H | 1.67463700  | -4.92346400 | 1.47577800  |
| C | 0.33949100  | -2.45087800 | 2.50590200  |
| C | -0.85537600 | -1.80673800 | 2.88317700  |
| H | -1.37597500 | -1.16200900 | 2.17443600  |
| C | -1.35064300 | -1.96335500 | 4.17638700  |
| H | -2.27350400 | -1.46499600 | 4.45830700  |
| C | -0.66333500 | -2.74650700 | 5.10730300  |
| H | -1.05284800 | -2.86485100 | 6.11406000  |
| C | 0.53210100  | -3.36573400 | 4.74293500  |



|    |             |             |             |
|----|-------------|-------------|-------------|
| H  | 1.08017100  | -3.96278200 | 5.46584400  |
| C  | 1.03656800  | -3.21556200 | 3.44980400  |
| H  | 1.98108400  | -3.67938800 | 3.19316000  |
| C  | -0.76086700 | 2.32405100  | -0.88631100 |
| C  | -1.98870900 | 2.47993800  | -1.79505500 |
| H  | -1.89746700 | 1.89190100  | -2.71102200 |
| H  | -2.11542900 | 3.53230800  | -2.07934300 |
| H  | -2.89466000 | 2.15657800  | -1.27602200 |
| C  | 0.53339900  | 2.74652900  | -1.59434100 |
| H  | 1.41165300  | 2.53751000  | -0.97640200 |
| H  | 0.52429900  | 3.82647500  | -1.78426300 |
| H  | 0.67403500  | 2.24330400  | -2.55278700 |
| C  | -0.95400800 | 3.19509800  | 0.36721400  |
| H  | -1.77954000 | 2.82657800  | 0.98093800  |
| H  | -1.17719500 | 4.22678800  | 0.07093200  |
| H  | -0.05268200 | 3.22934600  | 0.98778600  |
| Ni | 1.25255100  | 0.07966200  | 0.86067800  |
| C  | 4.52433700  | 3.24576200  | -0.59022100 |
| C  | 3.90176000  | 4.35631600  | 0.04017500  |
| C  | 4.20513400  | 5.65492100  | -0.38540400 |
| C  | 5.11546800  | 5.80558600  | -1.42767500 |
| C  | 5.72240600  | 4.69180300  | -2.04230200 |
| C  | 5.43847300  | 3.38998100  | -1.63464700 |
| C  | 3.14147800  | 2.60358900  | 1.01743800  |
| H  | 3.73579400  | 6.51082700  | 0.08887500  |
| H  | 5.36497300  | 6.80228700  | -1.77888000 |
| H  | 6.42539100  | 4.85157600  | -2.85424400 |
| H  | 5.90351900  | 2.53360100  | -2.11257300 |
| N  | 4.01983200  | 2.13722900  | 0.06872100  |
| N  | 3.03798000  | 3.91633400  | 1.03695900  |
| C  | 4.28199300  | 0.72181000  | -0.15275800 |
| H  | 3.54547100  | 0.32700400  | -0.86392600 |
| H  | 5.27485500  | 0.61843700  | -0.59683500 |
| C  | 4.19604300  | -0.01447400 | 1.18447900  |
| H  | 4.31910400  | -1.08669500 | 1.00944300  |
| H  | 5.04845800  | 0.30393100  | 1.80696500  |
| C  | 2.87681300  | -0.34881200 | 3.32450000  |
| H  | 1.89679500  | -0.24963100 | 3.79998600  |
| H  | 3.12445200  | -1.41336200 | 3.30246000  |
| H  | 3.61764200  | 0.14463800  | 3.97344800  |
| C  | 2.89538200  | 0.24173100  | 1.93116200  |
| C  | 2.35455900  | 1.63583500  | 1.82628200  |
| H  | 1.28832100  | 1.65637400  | 1.26889500  |
| H  | 2.03754600  | 2.07449500  | 2.77477300  |

|   |             |             |             |
|---|-------------|-------------|-------------|
| H | -3.21578700 | -3.82412100 | -3.59977000 |
| H | -3.63024100 | -2.70461600 | -1.17316900 |
| C | -5.58373100 | 2.24490300  | -0.23985300 |
| H | -6.10683800 | 2.39634700  | -1.18395400 |
| C | -5.55979000 | 0.99167100  | 0.23571300  |
| H | -6.04814900 | 0.23594300  | -0.38178300 |
| C | -4.93493500 | 0.40828100  | 1.47957400  |
| H | -5.69619900 | -0.21304000 | 1.97732100  |
| C | -4.28908100 | 1.34379000  | 2.51011700  |
| H | -3.52780000 | 1.94304000  | 2.01070900  |
| H | -3.72918600 | 0.71396200  | 3.21354000  |
| C | -5.24597600 | 2.22079900  | 3.34026700  |
| H | -5.74320600 | 1.57701400  | 4.07927400  |
| H | -4.64570000 | 2.93495700  | 3.92159000  |
| C | -6.35040100 | 2.98093600  | 2.58955100  |
| H | -7.00231200 | 2.25854300  | 2.08642100  |
| H | -6.97859900 | 3.48542200  | 3.33560800  |
| C | -5.89702500 | 4.03099800  | 1.56840500  |
| H | -5.33694600 | 4.82682300  | 2.07802400  |
| H | -6.79500500 | 4.50534400  | 1.15113700  |
| C | -5.03005600 | 3.49321000  | 0.40533000  |
| H | -4.94459300 | 4.27896200  | -0.35399900 |
| H | -4.01538300 | 3.32001300  | 0.76452200  |
| H | -4.15039700 | -0.27904100 | 1.13876500  |

**7coo**

|    |             |             |             |
|----|-------------|-------------|-------------|
| Ni | -0.13602500 | -0.22159200 | -0.66076200 |
| C  | -2.05904600 | 0.14325000  | -0.69329200 |
| C  | -1.91584100 | -0.63985600 | -1.98193100 |
| C  | -2.89167600 | -0.55176800 | 0.37525400  |
| C  | -2.52758100 | 1.58426100  | -0.87567100 |
| H  | -2.11759400 | -0.05202900 | -2.88050700 |
| H  | -0.84495300 | -1.02132000 | -2.16799300 |
| H  | -2.48013900 | -1.57456800 | -2.00273500 |
| C  | -4.36768200 | -0.64223200 | -0.03521400 |
| H  | -2.82137900 | 0.00255600  | 1.31428600  |
| H  | -2.51788900 | -1.55832700 | 0.56255400  |
| C  | -4.01885800 | 1.66287700  | -1.02915300 |
| H  | -2.05984100 | 2.06729600  | -1.73745200 |
| H  | -2.24525800 | 2.18593100  | -0.00444600 |
| N  | -4.82320900 | 0.63714400  | -0.56932200 |
| H  | -4.99451700 | -0.90785400 | 0.82251100  |
| H  | -4.51073200 | -1.41414700 | -0.80269700 |
| N  | -4.70401200 | 2.65752200  | -1.55529400 |

|   |             |             |             |
|---|-------------|-------------|-------------|
| C | -6.13164100 | 1.00242900  | -0.83966500 |
| C | -6.03739600 | 2.27869500  | -1.45178300 |
| C | -7.35120000 | 0.36150800  | -0.61969100 |
| C | -7.20322600 | 2.94334300  | -1.84895300 |
| C | -8.49922500 | 1.04194300  | -1.02396700 |
| H | -7.40904600 | -0.61907700 | -0.15772100 |
| C | -8.42562200 | 2.31261700  | -1.62763200 |
| H | -7.14483200 | 3.92109700  | -2.31679300 |
| H | -9.47086500 | 0.58158100  | -0.87158500 |
| H | -9.34422300 | 2.80821800  | -1.92763600 |
| H | -1.78493100 | 2.66475100  | 2.15290900  |
| C | -1.63355300 | 1.79648800  | 2.78319900  |
| C | -0.60576000 | 0.88516100  | 2.49741900  |
| C | -2.47321100 | 1.59310900  | 3.87940200  |
| P | 0.43415900  | 1.01095000  | 1.00387900  |
| C | -0.44230100 | -0.23650400 | 3.32651500  |
| C | -2.29814000 | 0.48040000  | 4.70250500  |
| H | -3.26477600 | 2.30690600  | 4.08641200  |
| C | 0.48718100  | 2.76966100  | 0.52226200  |
| H | 0.33509900  | -0.96261700 | 3.11162200  |
| C | -1.27868400 | -0.43289400 | 4.42412600  |
| H | -2.95123600 | 0.32467600  | 5.55565800  |
| C | 0.61379900  | 3.05805400  | -0.84471800 |
| C | 0.52440700  | 3.82078800  | 1.45060600  |
| H | -1.13580900 | -1.30230300 | 5.05839800  |
| H | 0.60645200  | 2.24006800  | -1.55880000 |
| C | 0.76799700  | 4.37300400  | -1.27827700 |
| C | 0.67201900  | 5.13715300  | 1.01328600  |
| H | 0.43343000  | 3.61545200  | 2.51142300  |
| H | 0.86651200  | 4.58352600  | -2.33876000 |
| C | 0.79369600  | 5.41493600  | -0.34942900 |
| H | 0.69357100  | 5.94544500  | 1.73808300  |
| H | 0.90768400  | 6.44085000  | -0.68632400 |
| C | 2.19923600  | 0.67948400  | 1.58637900  |
| C | 3.06683000  | 1.11933000  | 0.44423500  |
| H | 2.25253700  | -0.41129800 | 1.66174900  |
| C | 2.56471900  | 1.33501300  | 2.91558000  |
| C | 3.06616200  | 0.49495500  | -0.85656700 |
| C | 3.93261500  | 2.25503100  | 0.40153900  |
| H | 2.46312000  | 2.42234500  | 2.87012900  |
| H | 3.60836500  | 1.10721500  | 3.15418000  |
| H | 1.93917900  | 0.96978300  | 3.73198400  |
| P | 1.97891100  | -0.96522700 | -1.11970300 |
| C | 3.95406100  | 1.26443000  | -1.68110700 |

|    |             |             |             |
|----|-------------|-------------|-------------|
| H  | 4.16521300  | 2.90875500  | 1.22888500  |
| C  | 4.48421000  | 2.33859700  | -0.90788600 |
| O  | 2.42166400  | -2.12578800 | -0.20701000 |
| H  | 4.22099600  | 1.05494900  | -2.70479200 |
| H  | 5.21427900  | 3.06164000  | -1.24527200 |
| C  | 2.23281200  | -1.44639100 | -2.92761200 |
| C  | 3.70109600  | -1.82067800 | -3.17958100 |
| C  | 1.75982500  | -0.31280000 | -3.84694100 |
| C  | 1.37476900  | -2.69790700 | -3.17889500 |
| H  | 4.37673000  | -0.97301100 | -3.06113500 |
| H  | 3.82287100  | -2.21006700 | -4.19864600 |
| H  | 4.01670100  | -2.59902000 | -2.47904300 |
| H  | 0.71462800  | -0.05290600 | -3.64241800 |
| H  | 1.82374600  | -0.62131000 | -4.89804900 |
| H  | 2.35295200  | 0.59715700  | -3.73149900 |
| H  | 1.66895700  | -3.51532800 | -2.51526800 |
| H  | 1.50093800  | -3.03491400 | -4.21515900 |
| H  | 0.30875200  | -2.50347100 | -3.02423000 |
| Fe | 4.96194900  | 0.51175000  | -0.04276300 |
| C  | 6.37161700  | -0.84435600 | -0.71530300 |
| C  | 5.48900600  | -1.46956400 | 0.21674400  |
| C  | 7.01927900  | 0.24589500  | -0.05619900 |
| H  | 6.49374400  | -1.11947300 | -1.75348100 |
| H  | 4.76133000  | -2.24036600 | 0.00408400  |
| C  | 5.59195500  | -0.76317900 | 1.45235900  |
| C  | 6.53749700  | 0.29530400  | 1.28690100  |
| H  | 7.72212600  | 0.93468500  | -0.50468500 |
| H  | 5.01963100  | -0.97246500 | 2.34552100  |
| H  | 6.81296500  | 1.02733300  | 2.03375500  |
| C  | -0.57722000 | -3.46859400 | -0.10835300 |
| H  | 0.35993600  | -3.19463200 | -0.58352200 |
| C  | -0.61505300 | -3.25359400 | 1.21530100  |
| H  | 0.28520600  | -2.79986800 | 1.62893200  |
| C  | -1.68234700 | -3.53649800 | 2.24404600  |
| H  | -1.21957000 | -4.12301100 | 3.05325500  |
| C  | -2.98436300 | -4.22883500 | 1.81249100  |
| H  | -3.42907600 | -3.68773600 | 0.97333200  |
| H  | -3.70279200 | -4.12271500 | 2.63525700  |
| C  | -2.87012600 | -5.73284700 | 1.49113600  |
| H  | -2.78772400 | -6.27324300 | 2.44371400  |
| H  | -3.81450100 | -6.06493200 | 1.03833200  |
| C  | -1.69484200 | -6.18438600 | 0.61051500  |
| H  | -0.75371500 | -5.91208300 | 1.10008700  |
| H  | -1.70772800 | -7.28119800 | 0.57194100  |

|   |             |             |             |
|---|-------------|-------------|-------------|
| C | -1.67019200 | -5.66366000 | -0.83119300 |
| H | -2.54730700 | -6.03656800 | -1.37701000 |
| H | -0.79067400 | -6.09059800 | -1.32927400 |
| C | -1.61987400 | -4.12460400 | -0.97912700 |
| H | -1.40288000 | -3.89154600 | -2.02778300 |
| H | -2.61252400 | -3.71281300 | -0.78084200 |
| H | -1.94272600 | -2.57798000 | 2.71354900  |

### TS3

|    |             |             |             |
|----|-------------|-------------|-------------|
| Ni | 0.15261100  | 0.70729200  | -0.41202900 |
| C  | 2.34522200  | 0.75946800  | -0.67984100 |
| C  | 2.05142700  | 0.53136600  | -2.16236100 |
| C  | 3.44360000  | 1.82546700  | -0.47583900 |
| C  | 2.81944800  | -0.51044400 | 0.03257900  |
| H  | 2.84516400  | -0.05115800 | -2.64726500 |
| H  | 1.12569900  | -0.04594900 | -2.30998100 |
| H  | 1.94373000  | 1.47618400  | -2.70223600 |
| C  | 4.76671000  | 1.42892400  | -1.13939300 |
| H  | 3.61375900  | 1.95981900  | 0.59802900  |
| H  | 3.14246500  | 2.79307600  | -0.88049100 |
| C  | 4.23372000  | -0.88085600 | -0.30138900 |
| H  | 2.19459000  | -1.37145900 | -0.20977000 |
| H  | 2.75608800  | -0.36458600 | 1.11379800  |
| N  | 5.11248400  | 0.05617000  | -0.79812900 |
| H  | 5.57002200  | 2.09065600  | -0.80025400 |
| H  | 4.69842200  | 1.52292200  | -2.22999700 |
| N  | 4.77752800  | -2.07188000 | -0.15016800 |
| C  | 6.32315900  | -0.58923000 | -0.99347100 |
| C  | 6.09441500  | -1.92521300 | -0.57240800 |
| C  | 7.55563400  | -0.15336800 | -1.47981200 |
| C  | 7.13703200  | -2.85671400 | -0.63279700 |
| C  | 8.57921400  | -1.09911900 | -1.53116400 |
| H  | 7.71484500  | 0.87018100  | -1.80423600 |
| C  | 8.37254100  | -2.42837500 | -1.11358000 |
| H  | 6.97625800  | -3.88146700 | -0.31289400 |
| H  | 9.55641400  | -0.80436900 | -1.90176700 |
| H  | 9.19689800  | -3.13315400 | -1.17001000 |
| H  | 1.98776500  | -2.82051500 | 1.84463900  |
| C  | 1.74473900  | -2.10719100 | 2.62346300  |
| C  | 0.68895400  | -1.19970900 | 2.44972600  |
| C  | 2.51611100  | -2.08168300 | 3.78637500  |
| P  | -0.28750700 | -1.08477900 | 0.90082900  |
| C  | 0.42759700  | -0.26627400 | 3.46823600  |
| C  | 2.24647600  | -1.15266200 | 4.79117000  |

|   |             |             |             |
|---|-------------|-------------|-------------|
| H | 3.33457600  | -2.78627700 | 3.89744400  |
| C | -0.24191300 | -2.74577700 | 0.13969600  |
| H | -0.38222800 | 0.44795000  | 3.35638100  |
| C | 1.19772600  | -0.24414100 | 4.62897900  |
| H | 2.84944600  | -1.13399600 | 5.69391100  |
| C | -0.27901100 | -2.80043500 | -1.26086200 |
| C | -0.27612300 | -3.94214100 | 0.87228500  |
| H | 0.97778400  | 0.48217700  | 5.40562700  |
| H | -0.26892700 | -1.87416600 | -1.82582800 |
| C | -0.35598900 | -4.02585900 | -1.92063900 |
| C | -0.34558700 | -5.16737600 | 0.21059500  |
| H | -0.24081300 | -3.91733500 | 1.95559400  |
| H | -0.39010600 | -4.05424000 | -3.00551100 |
| C | -0.38796100 | -5.21120200 | -1.18476700 |
| H | -0.36740000 | -6.08875700 | 0.78488600  |
| H | -0.44311000 | -6.16742900 | -1.69628600 |
| C | -2.07468200 | -0.95351900 | 1.51203500  |
| C | -2.91096200 | -1.31494700 | 0.32291000  |
| H | -2.20454700 | 0.11162200  | 1.73032100  |
| C | -2.41585300 | -1.78718200 | 2.74615400  |
| C | -2.95802000 | -0.56074200 | -0.90372100 |
| C | -3.69237100 | -2.49882800 | 0.15803700  |
| H | -2.23079200 | -2.85088200 | 2.57644500  |
| H | -3.47850700 | -1.66447700 | 2.97876000  |
| H | -1.83791900 | -1.48095000 | 3.61838400  |
| P | -2.01442100 | 1.00861900  | -1.07712000 |
| C | -3.80309400 | -1.29862500 | -1.80410600 |
| H | -3.86849900 | -3.25281200 | 0.91033800  |
| C | -4.24550600 | -2.48415700 | -1.15199400 |
| O | -2.66904100 | 2.15952700  | -0.29351500 |
| H | -4.09687000 | -1.00146800 | -2.79714500 |
| H | -4.92509700 | -3.21740200 | -1.56420000 |
| C | -2.12463300 | 1.39615500  | -2.92830900 |
| C | -3.57443400 | 1.78750200  | -3.26158900 |
| C | -1.62145300 | 0.24398800  | -3.80771500 |
| C | -1.23288200 | 2.62181700  | -3.17071600 |
| H | -4.27946800 | 0.96680200  | -3.12294700 |
| H | -3.64053600 | 2.11718300  | -4.30642500 |
| H | -3.89746200 | 2.61109700  | -2.61946400 |
| H | -0.58309800 | -0.01020200 | -3.57217800 |
| H | -1.64650900 | 0.54616400  | -4.86250000 |
| H | -2.21588000 | -0.66515600 | -3.71078000 |
| H | -1.51669600 | 3.45062800  | -2.51722900 |
| H | -1.32972200 | 2.95771900  | -4.21060600 |

|    |             |             |             |
|----|-------------|-------------|-------------|
| H  | -0.18161300 | 2.38194500  | -2.99194000 |
| Fe | -4.84685200 | -0.79419000 | -0.10457900 |
| C  | -6.41390500 | 0.43168900  | -0.66744100 |
| C  | -5.56596800 | 1.10945200  | 0.25925300  |
| C  | -6.91626800 | -0.74724000 | -0.03388100 |
| H  | -6.60692200 | 0.73417900  | -1.68724700 |
| H  | -4.93646800 | 1.96345600  | 0.05085200  |
| C  | -5.54170200 | 0.34704300  | 1.46538300  |
| C  | -6.37704600 | -0.79891900 | 1.28749800  |
| H  | -7.55817700 | -1.49004400 | -0.48752500 |
| H  | -4.95672300 | 0.57878700  | 2.34469300  |
| H  | -6.53945800 | -1.58768100 | 2.00943500  |
| C  | 1.71480900  | 5.02528600  | -0.48633400 |
| H  | 1.88115300  | 5.72224400  | -1.30722600 |
| C  | 0.94746000  | 3.95433200  | -0.76824900 |
| H  | 0.58772100  | 3.89308800  | -1.79089700 |
| C  | 0.44853900  | 2.85617000  | 0.09979700  |
| H  | -0.64063000 | 2.80915900  | 0.00027900  |
| C  | 0.82016400  | 2.82719200  | 1.58721400  |
| H  | 1.89459000  | 2.96090500  | 1.72113200  |
| H  | 0.61542500  | 1.82041400  | 1.96173100  |
| C  | 0.03153500  | 3.81845800  | 2.46534500  |
| H  | -0.99504000 | 3.44130400  | 2.55717700  |
| H  | 0.46290300  | 3.80157400  | 3.47620000  |
| C  | -0.05472800 | 5.26608000  | 1.96374100  |
| H  | -0.57272200 | 5.27499600  | 0.99905200  |
| H  | -0.69804100 | 5.82470800  | 2.65552600  |
| C  | 1.26690800  | 6.03320800  | 1.82895500  |
| H  | 1.74541800  | 6.12887700  | 2.81311400  |
| H  | 1.02778200  | 7.05355000  | 1.50338700  |
| C  | 2.30250500  | 5.43564300  | 0.84155700  |
| H  | 3.07783800  | 6.19018400  | 0.66689700  |
| H  | 2.81490700  | 4.59517200  | 1.31498800  |
| H  | 1.34120400  | 1.75425400  | -0.25937100 |

**TS3'**

|    |             |             |             |
|----|-------------|-------------|-------------|
| Ni | -0.09909300 | -0.29133800 | -1.15967500 |
| N  | 0.96386200  | 1.25126700  | -1.21322700 |
| C  | 1.02427700  | 2.64076700  | -1.32368000 |
| C  | 2.22655600  | 0.75307900  | -1.07675100 |
| C  | 2.39078700  | 3.00056700  | -1.24310300 |
| C  | 0.04311500  | 3.62498700  | -1.48180000 |
| H  | 1.77971800  | -0.72961000 | -0.91319300 |
| N  | 3.09516900  | 1.80589500  | -1.09794200 |

|   |             |             |             |
|---|-------------|-------------|-------------|
| C | 2.80962400  | 4.33070200  | -1.30095300 |
| C | 0.46366400  | 4.95246800  | -1.54583900 |
| H | -1.00220700 | 3.34371000  | -1.53169200 |
| C | 4.54658500  | 1.64139500  | -1.08061400 |
| C | 1.82338500  | 5.30311800  | -1.45393100 |
| H | 3.85692800  | 4.59377900  | -1.20151400 |
| H | -0.27888400 | 5.73671300  | -1.66338700 |
| H | 4.76159000  | 0.69506000  | -1.58212400 |
| H | 4.98070600  | 2.44744600  | -1.67927500 |
| C | 5.19114200  | 1.62213300  | 0.31510800  |
| H | 2.11088100  | 6.34945900  | -1.49917300 |
| H | 4.74543800  | 0.80634400  | 0.89397900  |
| H | 6.24495900  | 1.36285700  | 0.16172700  |
| C | 5.08741500  | 2.93704700  | 1.05759000  |
| C | 3.90175700  | 3.10100000  | 1.96566800  |
| C | 6.00374100  | 3.89832200  | 0.89347500  |
| H | 3.88543800  | 4.08497700  | 2.44129700  |
| H | 2.95958700  | 2.97023900  | 1.42595300  |
| H | 3.91344100  | 2.33659800  | 2.75193900  |
| H | 5.92358400  | 4.85552800  | 1.40237200  |
| H | 6.86858000  | 3.76013000  | 0.24830100  |
| C | 1.43073400  | -1.95640500 | -0.87672200 |
| C | -0.00091700 | -2.48085900 | -0.78401400 |
| C | 2.13322500  | -2.40524100 | -2.17488700 |
| C | 2.20585300  | -2.30339200 | 0.42803600  |
| H | -0.37766100 | -2.51118500 | 0.23462900  |
| H | -0.77376700 | -1.91044400 | -1.39078800 |
| H | -0.12574500 | -3.47165600 | -1.24028700 |
| C | 3.14082900  | -3.54462900 | -1.97605100 |
| H | 2.69434300  | -1.55454900 | -2.58516200 |
| H | 1.39300500  | -2.69391600 | -2.92881700 |
| C | 3.66713000  | -2.46821200 | 0.19421600  |
| H | 1.81315900  | -3.23414500 | 0.86261900  |
| H | 2.05935000  | -1.51951500 | 1.17597500  |
| N | 4.07794800  | -3.12880300 | -0.94244400 |
| H | 3.70082300  | -3.73464000 | -2.89485900 |
| H | 2.64743900  | -4.47998500 | -1.68316700 |
| N | 4.66814300  | -2.05659700 | 0.94621800  |
| C | 5.46290900  | -3.14160600 | -0.92759000 |
| C | 5.81394600  | -2.46376400 | 0.27141500  |
| C | 6.41825500  | -3.64660300 | -1.80986700 |
| C | 7.16356900  | -2.28397800 | 0.59570100  |
| C | 7.75570700  | -3.45502200 | -1.46563300 |
| H | 6.13950700  | -4.16750800 | -2.72053900 |



|   |             |             |             |
|---|-------------|-------------|-------------|
| C | 8.12212500  | -2.78456300 | -0.28206000 |
| H | 7.44250700  | -1.76568300 | 1.50774000  |
| H | 8.53196200  | -3.83315400 | -2.12414000 |
| H | 9.17580400  | -2.65782300 | -0.05176900 |
| H | 0.83584900  | 0.69568000  | 4.12431200  |
| C | 0.58320800  | 1.59730500  | 3.57656600  |
| C | -0.28249200 | 1.53107800  | 2.47239500  |
| C | 1.10849800  | 2.81984800  | 3.99524100  |
| P | -0.92228800 | -0.06281000 | 1.81559600  |
| C | -0.55178400 | 2.71217100  | 1.76017100  |
| C | 0.80441800  | 3.99216700  | 3.30148500  |
| H | 1.76324700  | 2.85289200  | 4.86131700  |
| C | -1.11636800 | -1.12974600 | 3.31155700  |
| H | -1.16559200 | 2.68646600  | 0.86695900  |
| C | -0.01349000 | 3.93012200  | 2.17298000  |
| H | 1.21914500  | 4.94211100  | 3.62493200  |
| C | -0.99106800 | -2.51655600 | 3.13660900  |
| C | -1.42443900 | -0.64817800 | 4.59567300  |
| H | -0.22653400 | 4.82660000  | 1.59920700  |
| H | -0.74727600 | -2.91411900 | 2.15719200  |
| C | -1.17633100 | -3.39835200 | 4.20276900  |
| C | -1.59941400 | -1.52591000 | 5.66442000  |
| H | -1.52345200 | 0.41799900  | 4.76185800  |
| H | -1.07517400 | -4.46784300 | 4.04269100  |
| C | -1.47839300 | -2.90400600 | 5.47118200  |
| H | -1.83434500 | -1.13293300 | 6.64946900  |
| H | -1.61479600 | -3.58602300 | 6.30524600  |
| C | -2.72744200 | 0.39232900  | 1.43724600  |
| C | -3.26815500 | -0.69250200 | 0.55539600  |
| H | -2.63172400 | 1.28175400  | 0.81209500  |
| C | -3.59726300 | 0.72551600  | 2.64573600  |
| C | -3.08069700 | -0.75641700 | -0.87689400 |
| C | -3.94183000 | -1.88304500 | 0.95776200  |
| H | -3.73861200 | -0.13389400 | 3.30551400  |
| H | -4.58266200 | 1.06168500  | 2.31216000  |
| H | -3.14521200 | 1.53031900  | 3.23193300  |
| P | -2.07008200 | 0.49010300  | -1.73507200 |
| C | -3.65169300 | -1.99630100 | -1.32914900 |
| H | -4.25850000 | -2.11169200 | 1.96507500  |
| C | -4.18561400 | -2.68042000 | -0.19927500 |
| O | -2.48824300 | 1.89749000  | -1.32852100 |
| H | -3.72131800 | -2.33066500 | -2.35284800 |
| H | -4.72763600 | -3.61582800 | -0.22329000 |
| C | -2.17792000 | 0.26168000  | -3.59232400 |

|    |             |             |             |
|----|-------------|-------------|-------------|
| C  | -3.63721700 | 0.39161500  | -4.05163900 |
| C  | -1.57599100 | -1.08194300 | -4.02758000 |
| C  | -1.33953800 | 1.40460900  | -4.19264100 |
| H  | -4.26887200 | -0.40337600 | -3.64813200 |
| H  | -3.68260600 | 0.34159600  | -5.14651900 |
| H  | -4.05531800 | 1.35265300  | -3.74174800 |
| H  | -0.52567500 | -1.15959000 | -3.72698300 |
| H  | -1.61344000 | -1.16229000 | -5.12042600 |
| H  | -2.11074400 | -1.94127700 | -3.61659700 |
| H  | -1.72978100 | 2.38141100  | -3.89816400 |
| H  | -1.36281600 | 1.33804200  | -5.28665700 |
| H  | -0.29544900 | 1.34741600  | -3.86966100 |
| Fe | -5.09100200 | -0.83169200 | -0.42175400 |
| C  | -6.68424800 | -0.61636900 | -1.73380700 |
| C  | -6.13836000 | 0.66275800  | -1.41655800 |
| C  | -7.12058300 | -1.22326900 | -0.51609900 |
| H  | -6.73028600 | -1.06351000 | -2.71708500 |
| H  | -5.68568900 | 1.35547400  | -2.10917400 |
| C  | -6.23489400 | 0.84814400  | -0.00662700 |
| C  | -6.84211600 | -0.31718600 | 0.55178100  |
| H  | -7.54812100 | -2.21140000 | -0.41608200 |
| H  | -5.87821600 | 1.71000700  | 0.53796400  |
| H  | -7.01777600 | -0.49959700 | 1.60282100  |

**8**

|    |             |             |             |
|----|-------------|-------------|-------------|
| Ni | -0.88516200 | -0.75437100 | -0.48636800 |
| H  | -2.08371900 | -0.58429900 | -2.80068300 |
| C  | -2.29769100 | -1.18782300 | -1.92579700 |
| N  | -3.63665100 | -1.38144000 | -1.56849800 |
| N  | -1.51517600 | -2.24351800 | -1.52807100 |
| C  | -3.69708200 | -2.54159200 | -0.82047800 |
| C  | -4.75477600 | -0.59314300 | -2.05807600 |
| C  | -2.37704600 | -3.06230200 | -0.78316000 |
| C  | -4.75336700 | -3.18117100 | -0.16820100 |
| H  | -4.85019500 | -0.74652600 | -3.14139700 |
| H  | -5.66312000 | -0.98627900 | -1.59669400 |
| C  | -4.64054400 | 0.90685000  | -1.78419000 |
| C  | -2.10980900 | -4.24976900 | -0.09998600 |
| C  | -4.46480500 | -4.36325100 | 0.51799600  |
| H  | -5.76292400 | -2.78410400 | -0.19231400 |
| H  | -3.68375600 | 1.28098500  | -2.17040400 |
| H  | -5.40799600 | 1.40432900  | -2.39384100 |
| C  | -4.79386600 | 1.37005700  | -0.35425000 |
| C  | -3.16430200 | -4.89165200 | 0.55212900  |

|   |             |             |             |
|---|-------------|-------------|-------------|
| H | -1.10641800 | -4.66137000 | -0.08903900 |
| H | -5.26668900 | -4.88466600 | 1.03211700  |
| C | -4.89121300 | 2.86643700  | -0.20486100 |
| C | -4.83888800 | 0.55121000  | 0.70103400  |
| H | -2.97717400 | -5.81464000 | 1.09250600  |
| H | -4.99166900 | 3.16398300  | 0.84249500  |
| H | -4.00538800 | 3.36075100  | -0.61958600 |
| H | -5.75677000 | 3.26168000  | -0.75315100 |
| H | -4.95180800 | 0.94444700  | 1.70636800  |
| H | -4.74622800 | -0.52493300 | 0.61966100  |
| P | -0.52957700 | 1.16477100  | 0.41691700  |
| C | 1.30630300  | 1.54417100  | 0.73432400  |
| C | -1.08879100 | 2.64303200  | -0.52210200 |
| C | -1.20833000 | 1.31806400  | 2.11940400  |
| C | 2.08566200  | 0.99565000  | -0.42132200 |
| H | 1.53878400  | 0.92086900  | 1.60095700  |
| C | 1.62424900  | 2.99670300  | 1.07729100  |
| C | -1.27494200 | 2.48036500  | -1.90299100 |
| C | -1.25946100 | 3.92189800  | 0.03232600  |
| C | -0.62118700 | 0.51898400  | 3.11793100  |
| C | -2.33727200 | 2.08098900  | 2.44326500  |
| C | 2.35569700  | -0.40927900 | -0.63914500 |
| C | 2.64425300  | 1.71444300  | -1.51696600 |
| H | 1.39649100  | 3.67647500  | 0.25311200  |
| H | 2.68716200  | 3.09889900  | 1.31445100  |
| H | 1.05032800  | 3.31946800  | 1.95044800  |
| H | -1.13553600 | 1.49419100  | -2.33351800 |
| C | -1.63153700 | 3.56149200  | -2.71039300 |
| C | -1.62650700 | 5.00098800  | -0.77178600 |
| H | -1.10606900 | 4.07833100  | 1.09328200  |
| H | 0.23463600  | -0.11213100 | 2.88881100  |
| C | -1.13750500 | 0.51584200  | 4.41258500  |
| C | -2.85097400 | 2.07449900  | 3.74151400  |
| H | -2.82650300 | 2.67296300  | 1.68151700  |
| P | 1.84301000  | -1.65762300 | 0.55533400  |
| C | 3.08754900  | -0.52313800 | -1.87021500 |
| H | 2.64195100  | 2.78911900  | -1.62714700 |
| C | 3.26473300  | 0.78451500  | -2.40194800 |
| H | -1.77061600 | 3.41581400  | -3.77771200 |
| C | -1.81498800 | 4.82385700  | -2.14447300 |
| H | -1.76198200 | 5.98203300  | -0.32588900 |
| H | -0.66927000 | -0.10316300 | 5.17242100  |
| C | -2.25117800 | 1.29657600  | 4.73134200  |
| H | -3.72475900 | 2.67671300  | 3.97502100  |

|    |             |             |             |
|----|-------------|-------------|-------------|
| O  | 2.17991100  | -1.30233700 | 1.98803100  |
| C  | 2.37368200  | -3.35429300 | 0.03262900  |
| H  | 0.41690300  | -1.75201300 | 0.34406900  |
| H  | 3.47713100  | -1.43077800 | -2.30274200 |
| H  | 3.81746000  | 1.03132900  | -3.29783600 |
| H  | -2.10102100 | 5.66574700  | -2.76804100 |
| H  | -2.65143400 | 1.29173800  | 5.74093700  |
| C  | 3.90521100  | -3.46603800 | 0.04258100  |
| C  | 1.79067000  | -3.69596800 | -1.34851300 |
| C  | 1.77798200  | -4.29199400 | 1.10116300  |
| H  | 4.36823500  | -2.80965200 | -0.69750600 |
| H  | 4.19647500  | -4.49688200 | -0.19091200 |
| H  | 4.31478600  | -3.21678700 | 1.02560600  |
| H  | 0.72535700  | -3.45985300 | -1.41970100 |
| H  | 1.91832500  | -4.76844300 | -1.53761400 |
| H  | 2.29706100  | -3.15891500 | -2.15300500 |
| H  | 2.16855300  | -4.06090800 | 2.09535900  |
| H  | 2.03439700  | -5.32940700 | 0.85848400  |
| H  | 0.68684300  | -4.21389400 | 1.14226100  |
| Fe | 4.11422100  | 0.63564700  | -0.51067300 |
| C  | 6.14226800  | 1.03571100  | -0.66778200 |
| C  | 5.93871600  | -0.26684200 | -0.11727100 |
| C  | 5.51588500  | 1.98234800  | 0.19816100  |
| H  | 6.64679100  | 1.26166000  | -1.59716800 |
| H  | 6.26611300  | -1.19926800 | -0.55531900 |
| C  | 5.18707900  | -0.12429500 | 1.08796200  |
| C  | 4.92635500  | 1.26360800  | 1.28288100  |
| H  | 5.46028900  | 3.05004800  | 0.03646400  |
| H  | 4.80946200  | -0.91911200 | 1.71361500  |
| H  | 4.34290800  | 1.68377100  | 2.08936900  |

#### TS4

|    |             |             |             |
|----|-------------|-------------|-------------|
| Ni | -0.75938800 | -1.12314500 | -0.71377200 |
| H  | -1.48198900 | -2.28570400 | -1.31852600 |
| C  | -2.51532900 | -1.59845100 | -0.37161700 |
| N  | -3.63931900 | -1.18280600 | -1.08821600 |
| N  | -2.84867700 | -2.16532700 | 0.78153400  |
| C  | -4.75298100 | -1.49999000 | -0.32086500 |
| C  | -3.62528000 | -0.69640500 | -2.45921600 |
| C  | -4.22930900 | -2.09320500 | 0.85937000  |
| C  | -6.12359500 | -1.32407400 | -0.51451300 |
| H  | -3.08232100 | -1.42986300 | -3.06723700 |
| H  | -4.65700400 | -0.67538400 | -2.81768400 |
| C  | -2.96358800 | 0.67054900  | -2.66188300 |

|   |             |             |             |
|---|-------------|-------------|-------------|
| C | -5.09773500 | -2.49625300 | 1.87958400  |
| C | -6.97366800 | -1.73905400 | 0.51417600  |
| H | -6.52431500 | -0.88626200 | -1.42346800 |
| H | -1.98949200 | 0.66002400  | -2.15087800 |
| H | -2.72649800 | 0.75986200  | -3.73132700 |
| C | -3.72470300 | 1.90889300  | -2.24471300 |
| C | -6.46766200 | -2.31101100 | 1.69478400  |
| H | -4.70094600 | -2.93920700 | 2.78765800  |
| H | -8.04648100 | -1.61726400 | 0.39587500  |
| C | -3.16000000 | 3.19462600  | -2.79080600 |
| C | -4.79963400 | 1.90319300  | -1.44946400 |
| H | -7.15953200 | -2.61694000 | 2.47451900  |
| H | -3.70778500 | 4.06641700  | -2.42290200 |
| H | -2.10776900 | 3.30948400  | -2.51284100 |
| H | -3.19685900 | 3.20428300  | -3.88852400 |
| H | -5.29884200 | 2.83280400  | -1.18727700 |
| H | -5.21141100 | 0.99961200  | -1.01947400 |
| P | -0.35600500 | 0.68478500  | 0.52550900  |
| C | 1.27693700  | 0.67159500  | 1.47811000  |
| C | -0.26384100 | 2.30879700  | -0.31312800 |
| C | -1.67935300 | 0.80089200  | 1.77248100  |
| C | 2.37490700  | 0.83604900  | 0.46191300  |
| H | 1.33224300  | -0.34283800 | 1.88327000  |
| C | 1.35503900  | 1.70889100  | 2.59858700  |
| C | 0.33048700  | 2.33483100  | -1.58456500 |
| C | -0.64150500 | 3.51866200  | 0.28631900  |
| C | -1.59002100 | 0.06965700  | 2.96506500  |
| C | -2.89968500 | 1.40091900  | 1.42965400  |
| C | 2.75894800  | -0.10970400 | -0.56825100 |
| C | 3.19635000  | 1.99035300  | 0.29488600  |
| H | 1.21823400  | 2.72328200  | 2.21401300  |
| H | 2.33347800  | 1.66078800  | 3.08726600  |
| H | 0.58792200  | 1.53437400  | 3.35392700  |
| H | 0.61898100  | 1.40035100  | -2.05601300 |
| C | 0.56620500  | 3.54605300  | -2.23374300 |
| C | -0.42342200 | 4.72915300  | -0.37311600 |
| H | -1.10947500 | 3.51367300  | 1.26479800  |
| H | -0.67503000 | -0.45473700 | 3.22019400  |
| C | -2.69130300 | -0.02840800 | 3.81419500  |
| C | -4.00128800 | 1.28972600  | 2.27515800  |
| H | -3.00784800 | 1.92409300  | 0.48672900  |
| P | 2.00459900  | -1.72848300 | -0.72502300 |
| C | 3.82730400  | 0.48264000  | -1.32837700 |
| H | 3.17846300  | 2.86549900  | 0.92629800  |

|          |             |             |             |
|----------|-------------|-------------|-------------|
| C        | 4.08901500  | 1.77138200  | -0.79120600 |
| H        | 1.03399100  | 3.55168400  | -3.21365700 |
| C        | 0.18807500  | 4.74636200  | -1.62835600 |
| H        | -0.72650700 | 5.65984500  | 0.09730600  |
| H        | -2.60993300 | -0.60169300 | 4.73280400  |
| C        | -3.89978000 | 0.57867000  | 3.47151700  |
| H        | -4.94487400 | 1.74220400  | 1.98544100  |
| O        | 1.77755400  | -2.42813900 | 0.58823100  |
| C        | 2.78729400  | -2.75669600 | -2.05467100 |
| H        | 0.78752200  | -1.44313900 | -1.48947200 |
| H        | 4.36660100  | 0.02229400  | -2.14077300 |
| H        | 4.86506500  | 2.44771000  | -1.12117200 |
| H        | 0.36136400  | 5.69045600  | -2.13613200 |
| H        | -4.76336100 | 0.48021100  | 4.12198200  |
| C        | 4.26467600  | -3.02642400 | -1.73206900 |
| C        | 2.61714000  | -2.07305200 | -3.42042800 |
| C        | 1.99735100  | -4.07979700 | -2.04032600 |
| H        | 4.86435200  | -2.11436200 | -1.74493500 |
| H        | 4.67781800  | -3.71450600 | -2.47809700 |
| H        | 4.37499200  | -3.49439900 | -0.75003200 |
| H        | 1.56122100  | -1.88378300 | -3.64248900 |
| H        | 3.00447400  | -2.73338300 | -4.20415300 |
| H        | 3.15341100  | -1.12418900 | -3.49138100 |
| H        | 2.09319400  | -4.59137100 | -1.07999100 |
| H        | 2.38330300  | -4.73678600 | -2.82753900 |
| H        | 0.93132800  | -3.91350500 | -2.22926300 |
| Fe       | 4.34642400  | 0.29818900  | 0.65966900  |
| C        | 6.31256100  | 0.34963800  | 1.31688100  |
| C        | 5.99082400  | -0.95505200 | 0.83368300  |
| C        | 5.42244300  | 0.65336500  | 2.39064200  |
| H        | 7.06946500  | 1.00856600  | 0.91427500  |
| H        | 6.46601600  | -1.45960100 | 0.00454400  |
| C        | 4.90069400  | -1.45651400 | 1.60775500  |
| C        | 4.54922000  | -0.46279800 | 2.56839600  |
| H        | 5.38868800  | 1.58276700  | 2.94207200  |
| H        | 4.37625200  | -2.38862000 | 1.45680400  |
| H        | 3.73162100  | -0.52811400 | 3.27227600  |
| <b>9</b> |             |             |             |
| Ni       | -0.23791600 | -0.21884100 | -1.11655400 |
| H        | -0.21857800 | -0.99066100 | -2.36790500 |
| C        | -1.82244200 | -1.13614300 | -0.94470200 |
| N        | -3.01899600 | -1.00063600 | -1.62697700 |
| N        | -1.89089700 | -2.08289200 | -0.01776300 |

|   |             |             |             |
|---|-------------|-------------|-------------|
| C | -3.90499800 | -1.93935700 | -1.10545200 |
| C | -3.27097600 | -0.09530500 | -2.73769500 |
| C | -3.17781300 | -2.60024900 | -0.08170500 |
| C | -5.23212500 | -2.25769800 | -1.39566800 |
| H | -2.56074100 | -0.33136400 | -3.53772100 |
| H | -4.27562300 | -0.30360400 | -3.11251400 |
| C | -3.13058100 | 1.38909200  | -2.39370800 |
| C | -3.79440300 | -3.59894900 | 0.67816700  |
| C | -5.82827700 | -3.26242300 | -0.62991400 |
| H | -5.78649500 | -1.75197500 | -2.18020000 |
| H | -2.13078700 | 1.54881200  | -1.96956200 |
| H | -3.13132700 | 1.94068300  | -3.34448800 |
| C | -4.15366200 | 2.02267000  | -1.47656700 |
| C | -5.12101000 | -3.92060500 | 0.39235400  |
| H | -3.24536400 | -4.10084400 | 1.46913500  |
| H | -6.85950500 | -3.53882600 | -0.82933700 |
| C | -4.11609700 | 3.52949800  | -1.45802400 |
| C | -5.02402600 | 1.34477400  | -0.72000400 |
| H | -5.62048800 | -4.69378000 | 0.96925200  |
| H | -4.84063200 | 3.94295000  | -0.75107700 |
| H | -3.12246500 | 3.89430600  | -1.18219100 |
| H | -4.33568800 | 3.94003200  | -2.45278300 |
| H | -5.72984700 | 1.87510800  | -0.08506500 |
| H | -5.07463900 | 0.26422500  | -0.69207000 |
| P | -0.39123200 | 1.14915200  | 0.72250300  |
| C | 1.41615000  | 1.24913500  | 1.24997500  |
| C | -0.80454400 | 2.89682800  | 0.39201600  |
| C | -1.39382700 | 0.59398400  | 2.13329800  |
| C | 2.10998900  | 0.88311300  | -0.03365300 |
| H | 1.58010900  | 0.42894100  | 1.95362700  |
| C | 1.86537800  | 2.55996200  | 1.88559800  |
| C | -0.43231400 | 3.41425200  | -0.85947500 |
| C | -1.34416000 | 3.75971700  | 1.35546900  |
| C | -0.86049700 | -0.28994400 | 3.08203900  |
| C | -2.76996800 | 0.87260900  | 2.14777700  |
| C | 2.15859000  | -0.47973700 | -0.55899900 |
| C | 2.63407600  | 1.75399900  | -1.03629800 |
| H | 1.73093700  | 3.41115800  | 1.21405200  |
| H | 2.92517100  | 2.49824400  | 2.15021200  |
| H | 1.29508500  | 2.76099600  | 2.79664900  |
| H | -0.02931200 | 2.74770100  | -1.61589300 |
| C | -0.57386300 | 4.77450900  | -1.13301000 |
| C | -1.50628800 | 5.11567100  | 1.07088600  |
| H | -1.63457300 | 3.37263500  | 2.32615600  |

|    |             |             |             |
|----|-------------|-------------|-------------|
| H  | 0.18834700  | -0.56749600 | 3.05924700  |
| C  | -1.68903700 | -0.85900600 | 4.04904000  |
| C  | -3.59169800 | 0.29613400  | 3.11362900  |
| H  | -3.20659300 | 1.51573700  | 1.39091500  |
| P  | 1.74860700  | -1.91065800 | 0.50414700  |
| C  | 2.78005300  | -0.40183800 | -1.86015300 |
| H  | 2.73906600  | 2.82469600  | -0.94220800 |
| C  | 3.05114500  | 0.96411700  | -2.14955600 |
| H  | -0.27809900 | 5.16393200  | -2.10253300 |
| C  | -1.11313600 | 5.62733400  | -0.16762400 |
| H  | -1.93183000 | 5.77514800  | 1.82129800  |
| H  | -1.26564500 | -1.54242800 | 4.77889000  |
| C  | -3.05301200 | -0.56713600 | 4.06939200  |
| H  | -4.65573400 | 0.51278300  | 3.10958200  |
| O  | 2.37974200  | -1.79668900 | 1.87758900  |
| C  | 2.06649600  | -3.51156600 | -0.37516500 |
| H  | 0.33680000  | -1.89483400 | 0.54476300  |
| H  | 3.00828100  | -1.23654100 | -2.50299400 |
| H  | 3.53370000  | 1.33389700  | -3.04341700 |
| H  | -1.23433700 | 6.68474800  | -0.38235800 |
| H  | -3.69608700 | -1.02077100 | 4.81759100  |
| C  | 3.56345600  | -3.70793800 | -0.64834500 |
| C  | 1.23896100  | -3.59429500 | -1.66664700 |
| C  | 1.56672500  | -4.58464400 | 0.61424600  |
| H  | 3.95507900  | -2.96517700 | -1.34734200 |
| H  | 3.72584300  | -4.69962900 | -1.08626100 |
| H  | 4.14708300  | -3.65157200 | 0.27465100  |
| H  | 0.17912400  | -3.41138500 | -1.47304600 |
| H  | 1.33974700  | -4.60138500 | -2.08917800 |
| H  | 1.56753500  | -2.87946800 | -2.42297500 |
| H  | 2.10930700  | -4.54118900 | 1.56224800  |
| H  | 1.71393600  | -5.57782800 | 0.17508300  |
| H  | 0.49823300  | -4.46264900 | 0.82178600  |
| Fe | 4.04531600  | 0.38022700  | -0.42734000 |
| C  | 6.06989600  | 0.69979300  | -0.71582100 |
| C  | 5.82853500  | -0.68342600 | -0.45092500 |
| C  | 5.60379500  | 1.45030200  | 0.40587400  |
| H  | 6.49165300  | 1.10983700  | -1.62317900 |
| H  | 6.04148700  | -1.50406700 | -1.12115600 |
| C  | 5.21298700  | -0.78554300 | 0.83190500  |
| C  | 5.07164800  | 0.53043200  | 1.36023100  |
| H  | 5.60853500  | 2.52802300  | 0.49383600  |
| H  | 4.82609600  | -1.67815500 | 1.29829400  |
| H  | 4.60261100  | 0.78075400  | 2.30051200  |



## 10

|    |             |             |             |
|----|-------------|-------------|-------------|
| Ni | -1.98987200 | -1.83789800 | -0.82868200 |
| H  | -3.41101700 | -1.40208900 | -1.03098300 |
| C  | -0.17470700 | -2.35570100 | -0.37682900 |
| N  | 0.78930400  | -2.66298100 | -1.33599400 |
| N  | 0.32323900  | -2.58331900 | 0.84489500  |
| C  | 1.91931100  | -3.15319800 | -0.70043200 |
| C  | 0.57344700  | -2.58287100 | -2.76428900 |
| C  | 1.60588300  | -3.08478400 | 0.68200200  |
| C  | 3.13842000  | -3.65210900 | -1.16231700 |
| H  | 0.31407000  | -1.55428900 | -3.03440300 |
| H  | 1.51167700  | -2.82771600 | -3.26628200 |
| C  | -0.52630800 | -3.56004200 | -3.21570400 |
| C  | 2.54769600  | -3.50664100 | 1.62921900  |
| C  | 4.05479900  | -4.08697800 | -0.20326600 |
| H  | 3.37113300  | -3.70855100 | -2.22153900 |
| H  | -0.45797700 | -3.67623500 | -4.30455300 |
| H  | -0.32050400 | -4.53509600 | -2.76480200 |
| C  | -1.93451300 | -3.11403800 | -2.88865700 |
| C  | 3.76578900  | -4.01008500 | 1.17289200  |
| H  | 2.31819200  | -3.45285600 | 2.68940000  |
| H  | 5.01284200  | -4.48421700 | -0.52532900 |
| C  | -2.53072100 | -2.09510000 | -3.82628100 |
| C  | -2.67055200 | -3.71775800 | -1.91201800 |
| H  | 4.50727300  | -4.35070200 | 1.88979400  |
| H  | -3.52674700 | -1.78428200 | -3.50781500 |
| H  | -1.89384700 | -1.20575300 | -3.90003100 |
| H  | -2.59729300 | -2.51882100 | -4.83700900 |
| H  | -3.73434400 | -3.53723100 | -1.81172800 |
| H  | -2.24360800 | -4.52237700 | -1.32012900 |
| P  | -2.12864000 | -0.16735700 | 0.50963400  |
| C  | -0.47788200 | 0.51275200  | 1.06620700  |
| C  | -3.10604700 | 1.28785100  | -0.03739300 |
| C  | -2.90108800 | -0.76349100 | 2.05734400  |
| C  | 0.38835700  | 0.86971500  | -0.12380100 |
| H  | -0.03003100 | -0.39299700 | 1.49220900  |
| C  | -0.56628900 | 1.57042000  | 2.17238900  |
| C  | -3.47639600 | 1.39896400  | -1.38457600 |
| C  | -3.43635500 | 2.33394600  | 0.84038400  |
| C  | -2.18166500 | -1.68773400 | 2.83443000  |
| C  | -4.19840000 | -0.39918500 | 2.44053000  |
| C  | 1.83264200  | 0.96858800  | -0.09707600 |
| C  | -0.01266700 | 1.03272000  | -1.48591100 |

|    |             |             |             |
|----|-------------|-------------|-------------|
| H  | -1.03069500 | 2.48677300  | 1.81313800  |
| H  | 0.43658800  | 1.81856500  | 2.52637100  |
| H  | -1.14598100 | 1.18649400  | 3.01713300  |
| H  | -3.26356000 | 0.57554100  | -2.05817600 |
| C  | -4.11860900 | 2.54323600  | -1.85684900 |
| C  | -4.08926300 | 3.47381400  | 0.37008200  |
| H  | -3.20408800 | 2.25514900  | 1.89476400  |
| H  | -1.20079600 | -2.02375600 | 2.50479100  |
| C  | -2.74727600 | -2.20253800 | 3.99994900  |
| C  | -4.75803100 | -0.92451900 | 3.60598600  |
| H  | -4.77388800 | 0.29074300  | 1.83408500  |
| P  | 2.83125000  | 0.81426400  | 1.40202900  |
| C  | 2.28013400  | 1.19348600  | -1.44331800 |
| H  | -1.02700100 | 1.06053700  | -1.84664900 |
| C  | 1.14295400  | 1.22772100  | -2.29299800 |
| H  | -4.39173900 | 2.61361800  | -2.90555600 |
| C  | -4.41945600 | 3.58763700  | -0.98145600 |
| H  | -4.34154200 | 4.27128200  | 1.06252500  |
| H  | -2.18350600 | -2.91211400 | 4.59855800  |
| C  | -4.03161900 | -1.81925300 | 4.39241300  |
| H  | -5.76284400 | -0.63251100 | 3.89715400  |
| O  | 2.62859600  | 1.89592200  | 2.43931800  |
| C  | 4.61595600  | 0.56425800  | 0.96871800  |
| H  | 2.45654500  | -0.47512900 | 1.85109900  |
| H  | 3.29836300  | 1.35298700  | -1.75894500 |
| H  | 1.14994300  | 1.42753300  | -3.35565400 |
| H  | -4.92238400 | 4.47823600  | -1.34618100 |
| H  | -4.46783000 | -2.22328500 | 5.30130800  |
| C  | 5.21156900  | 1.88380700  | 0.45400000  |
| C  | 4.79476900  | -0.58679900 | -0.02874700 |
| C  | 5.29153200  | 0.18489700  | 2.30257800  |
| H  | 4.77675900  | 2.19203700  | -0.50011600 |
| H  | 6.29138100  | 1.76631100  | 0.30660400  |
| H  | 5.05189700  | 2.69073400  | 1.17489800  |
| H  | 4.31806800  | -1.50101100 | 0.32952600  |
| H  | 5.86357400  | -0.79998800 | -0.15041100 |
| H  | 4.38626000  | -0.36177400 | -1.01511000 |
| H  | 5.14513800  | 0.95907300  | 3.06021800  |
| H  | 6.36801500  | 0.05651000  | 2.14170800  |
| H  | 4.89784500  | -0.75961100 | 2.69366000  |
| Fe | 1.02934900  | 2.71217000  | -0.85534600 |
| C  | 1.42667000  | 4.52634000  | -1.76809300 |
| C  | 2.15590000  | 4.41525200  | -0.54536000 |
| C  | 0.03590800  | 4.42828100  | -1.46092600 |

|   |             |            |             |
|---|-------------|------------|-------------|
| H | 1.85379300  | 4.61732800 | -2.75754300 |
| H | 3.23211600  | 4.40795700 | -0.44446100 |
| C | 1.21715100  | 4.25194500 | 0.51864900  |
| C | -0.09118300 | 4.26590600 | -0.04880500 |
| H | -0.77951700 | 4.43421100 | -2.17100300 |
| H | 1.47074900  | 4.05307500 | 1.54964400  |
| H | -1.02301200 | 4.13327400 | 0.48009300  |

## 11

|    |             |             |             |
|----|-------------|-------------|-------------|
| Ni | 1.19020200  | 1.09039200  | -0.94022800 |
| H  | -0.26930500 | 1.36671100  | -0.93054100 |
| C  | 3.05455900  | 0.53974300  | -0.92693100 |
| N  | 3.99158000  | 1.23957700  | -0.16611100 |
| N  | 3.63144600  | -0.51711500 | -1.49953500 |
| C  | 5.21687400  | 0.60526200  | -0.27126600 |
| C  | 3.71737800  | 2.50246200  | 0.48276100  |
| C  | 4.96720300  | -0.50545800 | -1.12132800 |
| C  | 6.47345100  | 0.84965900  | 0.28526800  |
| H  | 2.98909100  | 2.36075600  | 1.28925400  |
| H  | 4.64316900  | 2.86473600  | 0.93419800  |
| C  | 3.20718700  | 3.53388200  | -0.54344300 |
| C  | 6.00700700  | -1.39381400 | -1.42287700 |
| C  | 7.49514200  | -0.04723800 | -0.03060100 |
| H  | 6.65560400  | 1.69505100  | 0.94230100  |
| H  | 3.31135900  | 4.53466800  | -0.10667300 |
| H  | 3.85831200  | 3.48501200  | -1.42059400 |
| C  | 1.75760100  | 3.36494400  | -0.94897300 |
| C  | 7.26452300  | -1.15292900 | -0.87170300 |
| H  | 5.82479200  | -2.24838800 | -2.06795300 |
| H  | 8.48674900  | 0.10902600  | 0.38453200  |
| C  | 0.75376600  | 3.95205900  | 0.00866400  |
| C  | 1.39107100  | 2.88705700  | -2.17810000 |
| H  | 8.08446400  | -1.83123700 | -1.09043800 |
| H  | -0.26955500 | 3.79894600  | -0.33261300 |
| H  | 0.85301900  | 3.51534300  | 1.00902700  |
| H  | 0.93543400  | 5.02997400  | 0.11254900  |
| H  | 0.36935800  | 2.97595700  | -2.52975100 |
| H  | 2.14560000  | 2.60400100  | -2.90607100 |
| P  | 0.69209400  | -0.60533000 | 0.31157100  |
| C  | -1.05053700 | -0.81657500 | 1.00807500  |
| C  | 1.03917600  | -2.21120300 | -0.47916000 |
| C  | 1.73702500  | -0.50352500 | 1.81476300  |
| C  | -2.03498900 | -0.81803500 | -0.12410600 |
| H  | -1.22368800 | 0.08036500  | 1.60831200  |

|   |             |             |             |
|---|-------------|-------------|-------------|
| C | -1.16780500 | -2.03645500 | 1.92875100  |
| C | 0.94822300  | -2.28008300 | -1.87610700 |
| C | 1.32211200  | -3.37425000 | 0.25011800  |
| C | 1.31268400  | 0.26266400  | 2.91191500  |
| C | 3.03002300  | -1.04752400 | 1.82178800  |
| C | -2.84741700 | 0.30044900  | -0.53935700 |
| C | -2.27250000 | -1.88708000 | -1.03884300 |
| H | -1.09512700 | -2.97161300 | 1.37035900  |
| H | -2.13789000 | -2.01390900 | 2.42760900  |
| H | -0.38870900 | -2.03140500 | 2.69475700  |
| H | 0.75808100  | -1.37445700 | -2.44226400 |
| C | 1.11051600  | -3.49812200 | -2.53232100 |
| C | 1.49523200  | -4.59088500 | -0.41010200 |
| H | 1.41911700  | -3.33085500 | 1.32890100  |
| H | 0.32336900  | 0.70921800  | 2.92367600  |
| C | 2.16138300  | 0.46557400  | 4.00094500  |
| C | 3.87567200  | -0.83902000 | 2.90976200  |
| H | 3.38533600  | -1.60808200 | 0.96556100  |
| P | -2.93580600 | 1.81262500  | 0.44726700  |
| C | -3.56574500 | -0.10160200 | -1.71704700 |
| H | -1.83475200 | -2.87213100 | -0.97885500 |
| C | -3.20643200 | -1.44545600 | -2.01824600 |
| H | 1.03937700  | -3.54052500 | -3.61484600 |
| C | 1.38224100  | -4.65550100 | -1.80010900 |
| H | 1.71972200  | -5.48643000 | 0.16166000  |
| H | 1.81804000  | 1.05521100  | 4.84588100  |
| C | 3.44460600  | -0.08406200 | 4.00224500  |
| H | 4.87787900  | -1.25582300 | 2.89168300  |
| O | -3.37889400 | 1.60854300  | 1.87761400  |
| C | -3.85836700 | 3.12655400  | -0.47787500 |
| H | -1.61197700 | 2.29242200  | 0.35024900  |
| H | -4.28899700 | 0.48552200  | -2.26061700 |
| H | -3.61400600 | -2.04330200 | -2.82162200 |
| H | 1.51684800  | -5.60383100 | -2.31208000 |
| H | 4.10605800  | 0.07917700  | 4.84789600  |
| C | -5.35004100 | 2.77227400  | -0.57655300 |
| C | -3.22678400 | 3.34104100  | -1.86246200 |
| C | -3.69545300 | 4.40730100  | 0.36420600  |
| H | -5.52489700 | 1.84527200  | -1.12700600 |
| H | -5.88633800 | 3.57745000  | -1.09202500 |
| H | -5.78929200 | 2.66124000  | 0.41898800  |
| H | -2.15366700 | 3.54718600  | -1.78584200 |
| H | -3.69503100 | 4.20499600  | -2.34829800 |
| H | -3.35014300 | 2.47850200  | -2.51960100 |

|    |             |             |             |
|----|-------------|-------------|-------------|
| H  | -4.08991600 | 4.27212400  | 1.37466200  |
| H  | -4.23846200 | 5.23133300  | -0.11245200 |
| H  | -2.64399100 | 4.70485500  | 0.44722400  |
| Fe | -4.05506400 | -1.30641300 | -0.12766100 |
| C  | -5.50616300 | -2.77292200 | 0.07183100  |
| C  | -6.12000100 | -1.49040700 | -0.06397900 |
| C  | -4.67383500 | -2.74163900 | 1.23193300  |
| H  | -5.61574300 | -3.60584700 | -0.60885300 |
| H  | -6.77491200 | -1.18240500 | -0.86767200 |
| C  | -5.66113700 | -0.66723400 | 1.00683000  |
| C  | -4.76751600 | -1.43840200 | 1.80738100  |
| H  | -4.04389700 | -3.54904300 | 1.57776000  |
| H  | -5.88980700 | 0.37596000  | 1.16040000  |
| H  | -4.21861300 | -1.05997600 | 2.65632600  |

**TS5**

|    |             |             |             |
|----|-------------|-------------|-------------|
| Ni | 1.26570600  | -0.18278000 | -1.12653500 |
| H  | 1.02922600  | 0.79024100  | -2.24819000 |
| C  | 2.44597900  | -1.14232500 | 0.02091700  |
| C  | 2.02633600  | -1.31103800 | -2.60840400 |
| P  | 0.39838100  | 1.41939900  | 0.11189600  |
| N  | 3.74033000  | -0.65073000 | -0.21114700 |
| N  | 2.47847500  | -2.17808900 | 0.84631900  |
| C  | 2.30739800  | 0.04227400  | -2.94083800 |
| H  | 1.20567800  | -1.80153600 | -3.12726200 |
| H  | 2.81208300  | -1.96201000 | -2.24971700 |
| C  | -1.45293400 | 1.64276700  | -0.25767500 |
| C  | 0.43084700  | 1.36568200  | 1.93813500  |
| C  | 1.22026000  | 2.99053300  | -0.35808600 |
| C  | 4.63033100  | -1.41029800 | 0.53481200  |
| C  | 4.01652900  | 0.57283800  | -0.95649400 |
| C  | 3.81498400  | -2.37289400 | 1.19046900  |
| C  | 3.66453000  | 0.58578900  | -2.46572200 |
| C  | 1.84201900  | 0.60800500  | -4.27459700 |
| C  | -2.18372600 | 0.62629100  | 0.57471000  |
| H  | -1.55013100 | 1.37043900  | -1.31262100 |
| C  | -1.97086100 | 3.06600200  | -0.03979500 |
| C  | 0.59558200  | 0.11977900  | 2.55900400  |
| C  | 0.17262800  | 2.49955000  | 2.72713600  |
| C  | 0.98032100  | 3.52626400  | -1.63474900 |
| C  | 2.19409000  | 3.58790600  | 0.45342200  |
| C  | 6.01324700  | -1.36735500 | 0.71031700  |
| H  | 3.48683900  | 1.39693000  | -0.47186900 |
| H  | 5.08461400  | 0.78506000  | -0.86483100 |

|   |             |             |             |
|---|-------------|-------------|-------------|
| C | 4.40363700  | -3.31792200 | 2.03630500  |
| H | 3.76331200  | 1.62929900  | -2.78356500 |
| H | 4.42351500  | 0.01588800  | -3.01783000 |
| H | 0.86605300  | 0.20291000  | -4.55321300 |
| H | 1.77989900  | 1.69993700  | -4.25541100 |
| H | 2.56471900  | 0.32497800  | -5.05118400 |
| C | -2.25447900 | -0.79936400 | 0.33780500  |
| C | -2.85335300 | 0.88700800  | 1.80857400  |
| H | -1.82397600 | 3.39887900  | 0.99033000  |
| H | -3.04335700 | 3.09921500  | -0.25251200 |
| H | -1.46844400 | 3.77891500  | -0.69497600 |
| H | 0.81385600  | -0.75963100 | 1.96439900  |
| C | 0.49910800  | 0.01126700  | 3.94724100  |
| C | 0.08060900  | 2.38564200  | 4.11303500  |
| H | 0.05239400  | 3.47150000  | 2.26136700  |
| H | 0.25587200  | 3.05434300  | -2.29187600 |
| C | 1.67825500  | 4.64743700  | -2.07638800 |
| C | 2.90214200  | 4.70522900  | 0.00300700  |
| H | 2.41012400  | 3.17811500  | 1.43362800  |
| C | 6.58031300  | -2.32127300 | 1.55869200  |
| H | 6.63141800  | -0.62720900 | 0.21028300  |
| C | 5.78761400  | -3.28247700 | 2.21094400  |
| H | 3.78834300  | -4.05747100 | 2.54046000  |
| P | -1.58158300 | -1.59559100 | -1.13594000 |
| C | -2.98135200 | -1.37975600 | 1.43386800  |
| H | -2.99334000 | 1.86041800  | 2.25316900  |
| C | -3.34324300 | -0.34034800 | 2.33192300  |
| H | 0.63395300  | -0.95826000 | 4.41699000  |
| C | 0.24006800  | 1.13966400  | 4.72499400  |
| H | -0.11514200 | 3.26846800  | 4.71467300  |
| H | 1.47349500  | 5.05482600  | -3.06205100 |
| C | 2.64436700  | 5.24039000  | -1.25809300 |
| H | 3.65644000  | 5.15360400  | 0.64275400  |
| H | 7.65514700  | -2.31980800 | 1.71609600  |
| H | 6.26430100  | -4.00888100 | 2.86306800  |
| O | -2.13177900 | -1.08220300 | -2.44734100 |
| C | -1.60340600 | -3.43800400 | -0.94130000 |
| H | -0.18194300 | -1.34453600 | -0.98077400 |
| H | -3.24262300 | -2.41945500 | 1.54689000  |
| H | -3.93194100 | -0.45758800 | 3.23087800  |
| H | 0.16871700  | 1.05251300  | 5.80526000  |
| H | 3.19366100  | 6.11017100  | -1.60541800 |
| C | -3.04804800 | -3.96009000 | -0.99762200 |
| C | -0.87988500 | -3.85139200 | 0.35060600  |

|    |             |             |             |
|----|-------------|-------------|-------------|
| C  | -0.81628400 | -3.97576700 | -2.15347900 |
| H  | -3.65149000 | -3.61594100 | -0.15443000 |
| H  | -3.04156200 | -5.05604500 | -0.97772600 |
| H  | -3.54451400 | -3.64290900 | -1.91968600 |
| H  | 0.12605200  | -3.42141700 | 0.41491800  |
| H  | -0.77425300 | -4.94266500 | 0.36745300  |
| H  | -1.42672500 | -3.55904600 | 1.24905600  |
| H  | -1.24907900 | -3.63623100 | -3.09856200 |
| H  | -0.83451500 | -5.07134900 | -2.13943900 |
| H  | 0.23073600  | -3.66027600 | -2.11446000 |
| Fe | -4.14167000 | 0.00089400  | 0.43970800  |
| C  | -6.20534600 | 0.03498300  | 0.60697700  |
| C  | -5.80163300 | -0.98700400 | -0.30653600 |
| C  | -5.72848800 | 1.28478200  | 0.10745000  |
| H  | -6.73983000 | -0.11582600 | 1.53486000  |
| H  | -5.97878000 | -2.04714700 | -0.19061900 |
| C  | -5.07646100 | -0.37046300 | -1.36982600 |
| C  | -5.02960100 | 1.03214500  | -1.11293300 |
| H  | -5.84316900 | 2.24594800  | 0.58957300  |
| H  | -4.55955400 | -0.87300900 | -2.17416100 |
| H  | -4.51434500 | 1.76576200  | -1.71682700 |

#### TS5'

|   |             |             |             |
|---|-------------|-------------|-------------|
| P | 2.08175300  | -0.21071000 | 0.43476000  |
| C | 0.37498000  | -0.70149000 | 1.01245400  |
| C | 2.90950400  | -1.73823900 | -0.15990800 |
| C | 2.94792900  | 0.24891200  | 1.98326500  |
| C | -0.54225900 | -0.92008100 | -0.17316600 |
| H | 0.04800500  | 0.23634500  | 1.47673000  |
| C | 0.34573100  | -1.79183700 | 2.08913500  |
| C | 3.33541400  | -1.79354400 | -1.49403000 |
| C | 3.10405600  | -2.86458700 | 0.65851400  |
| C | 2.36667500  | 1.24106500  | 2.79478100  |
| C | 4.20411500  | -0.27022400 | 2.32699900  |
| C | -1.97426800 | -0.71535900 | -0.16471700 |
| C | -0.17501600 | -1.25010800 | -1.51450000 |
| H | 0.62359100  | -2.76184800 | 1.67942400  |
| H | -0.66600100 | -1.86202800 | 2.49356300  |
| H | 1.02934000  | -1.53915400 | 2.90547900  |
| H | 3.21038200  | -0.91619200 | -2.12185800 |
| C | 3.91033300  | -2.95414200 | -2.01290400 |
| C | 3.68383400  | -4.02277700 | 0.14093900  |
| H | 2.82311800  | -2.83378000 | 1.70377300  |
| H | 1.41899900  | 1.69598900  | 2.51814400  |

|    |             |             |             |
|----|-------------|-------------|-------------|
| C  | 3.02343200  | 1.67038900  | 3.94665600  |
| C  | 4.85775400  | 0.17223100  | 3.47811300  |
| H  | 4.67516900  | -1.01941900 | 1.70062200  |
| P  | -2.90857400 | -0.32110500 | 1.33272500  |
| C  | -2.45151300 | -0.91333200 | -1.50531800 |
| H  | 0.81494200  | -1.51527600 | -1.84861800 |
| C  | -1.34239400 | -1.24020900 | -2.33052200 |
| H  | 4.23070900  | -2.98047000 | -3.05016000 |
| C  | 4.07954100  | -4.07362500 | -1.19762100 |
| H  | 3.83060400  | -4.88402900 | 0.78586700  |
| H  | 2.56302100  | 2.43178500  | 4.56928200  |
| C  | 4.26686500  | 1.13716800  | 4.29395600  |
| H  | 5.82898200  | -0.24046400 | 3.73532800  |
| O  | -2.81451300 | -1.35511000 | 2.43203200  |
| C  | -4.65284900 | 0.13296600  | 0.90598200  |
| H  | -2.35823500 | 0.93390200  | 1.68906000  |
| H  | -3.47841100 | -0.87121700 | -1.82995900 |
| H  | -1.38487900 | -1.49169200 | -3.38123300 |
| H  | 4.52843300  | -4.97758500 | -1.59823400 |
| H  | 4.77507800  | 1.47764100  | 5.19133000  |
| C  | -5.42031000 | -1.11731200 | 0.44792100  |
| C  | -4.69693900 | 1.25671800  | -0.13721100 |
| C  | -5.25734400 | 0.65054700  | 2.22725900  |
| H  | -5.02579700 | -1.53004600 | -0.48407600 |
| H  | -6.47303600 | -0.86055700 | 0.28171700  |
| H  | -5.37991700 | -1.90104300 | 1.20992900  |
| H  | -4.10226200 | 2.11586700  | 0.17824600  |
| H  | -5.73133900 | 1.60093300  | -0.25582700 |
| H  | -4.33813400 | 0.94232400  | -1.11838200 |
| H  | -5.19998600 | -0.10288000 | 3.01709500  |
| H  | -6.31069200 | 0.90822800  | 2.06891500  |
| H  | -4.74077700 | 1.55254600  | 2.57284600  |
| Fe | -1.55542600 | -2.62894300 | -0.81599700 |
| C  | -2.56049900 | -4.30920500 | -1.49555900 |
| C  | -2.94296900 | -4.01561600 | -0.15272800 |
| C  | -1.15105400 | -4.53721200 | -1.51153200 |
| H  | -3.21293500 | -4.30826800 | -2.35814100 |
| H  | -3.93375500 | -3.74959400 | 0.18531100  |
| C  | -1.77372500 | -4.06500300 | 0.66272300  |
| C  | -0.66625500 | -4.38883500 | -0.17656200 |
| H  | -0.54904500 | -4.74171800 | -2.38616500 |
| H  | -1.74071100 | -3.81420500 | 1.71129400  |
| H  | 0.36994500  | -4.45393400 | 0.12406300  |
| Ni | 2.16332800  | 1.67222700  | -0.65488900 |



|   |             |            |             |
|---|-------------|------------|-------------|
| H | 3.04457200  | 1.27124800 | -1.82266400 |
| C | 0.53269900  | 2.42720200 | -0.03927600 |
| C | 2.67030800  | 3.53811200 | -1.15060200 |
| N | -0.20797800 | 2.73207900 | -1.19548200 |
| N | -0.10858100 | 2.83107300 | 1.04756500  |
| C | 2.72548200  | 2.78323100 | -2.35357900 |
| H | 3.59765200  | 3.73966200 | -0.61440200 |
| H | 1.87147800  | 4.24832700 | -0.98463100 |
| C | -1.37400400 | 3.37222200 | -0.80280400 |
| C | 0.13506100  | 2.24601800 | -2.53060900 |
| C | -1.29116200 | 3.43004000 | 0.61511900  |
| C | 1.43003800  | 2.79451600 | -3.18004300 |
| C | 4.00637400  | 2.74139200 | -3.17250700 |
| C | -2.44997400 | 3.91545000 | -1.50508300 |
| H | 0.20126200  | 1.15581400 | -2.48063600 |
| H | -0.70114700 | 2.48352000 | -3.19274000 |
| C | -2.31263000 | 4.04712900 | 1.34512000  |
| H | 1.57807200  | 2.20968100 | -4.09482000 |
| H | 1.26888300  | 3.83363700 | -3.49379000 |
| H | 4.88531900  | 2.71079100 | -2.52342800 |
| H | 4.03677200  | 1.87790500 | -3.84405600 |
| H | 4.06787000  | 3.65036600 | -3.78534300 |
| C | -3.44993600 | 4.54288400 | -0.75838300 |
| H | -2.50817100 | 3.86845700 | -2.58862700 |
| C | -3.38303300 | 4.60728200 | 0.64540600  |
| H | -2.25639100 | 4.09638800 | 2.42847000  |
| H | -4.29832600 | 4.98474500 | -1.27266000 |
| H | -4.18199200 | 5.09905100 | 1.19258300  |

## 12

|    |             |             |             |
|----|-------------|-------------|-------------|
| Ni | 1.56130400  | 0.29953700  | -1.19241600 |
| H  | 4.18371300  | 1.21924800  | -1.96023500 |
| C  | 1.95161900  | -1.27552800 | -0.34919800 |
| C  | 2.72464500  | -0.23007000 | -2.58429700 |
| P  | 0.55211900  | 1.56980500  | 0.39879100  |
| N  | 3.18769300  | -1.54505000 | 0.20805800  |
| N  | 1.07724400  | -2.24041800 | -0.10308100 |
| C  | 4.17888600  | 0.19618400  | -2.36803300 |
| H  | 2.22774900  | 0.43343300  | -3.32543500 |
| H  | 2.65495000  | -1.25790900 | -2.95578100 |
| C  | -1.31008700 | 1.78652100  | 0.52971800  |
| C  | 1.07070500  | 1.28823000  | 2.12797000  |
| C  | 1.21035200  | 3.20708100  | -0.09368900 |
| C  | 3.09384800  | -2.76077900 | 0.87474700  |

|   |             |             |             |
|---|-------------|-------------|-------------|
| C | 4.36792700  | -0.70773200 | 0.06199600  |
| C | 1.75310700  | -3.18283600 | 0.66704700  |
| C | 4.93362700  | -0.69440700 | -1.36368700 |
| C | 4.94143100  | 0.23221300  | -3.70380500 |
| C | -1.88046200 | 0.42872200  | 0.82695200  |
| H | -1.62467800 | 2.05228100  | -0.48384200 |
| C | -1.72261800 | 2.86813200  | 1.52711600  |
| C | 1.11806100  | -0.04010100 | 2.58057700  |
| C | 1.35785100  | 2.33030400  | 3.02284800  |
| C | 0.48340500  | 4.03330300  | -0.96611600 |
| C | 2.53010800  | 3.56262100  | 0.23534100  |
| C | 3.99887400  | -3.50605300 | 1.62989400  |
| H | 4.11203800  | 0.31085100  | 0.37648100  |
| H | 5.11897400  | -1.08281300 | 0.76137400  |
| C | 1.30463300  | -4.37957500 | 1.23553300  |
| H | 5.97243700  | -0.34452500 | -1.30629300 |
| H | 4.96849100  | -1.72691400 | -1.73578400 |
| H | 4.45210100  | 0.90323000  | -4.41790800 |
| H | 5.97411600  | 0.57745600  | -3.56957800 |
| H | 4.97656900  | -0.76640600 | -4.15567100 |
| C | -2.04713700 | -0.64734900 | -0.12644500 |
| C | -2.30901100 | -0.05497400 | 2.09895900  |
| H | -1.37277200 | 2.64096200  | 2.53719900  |
| H | -2.81244500 | 2.95059600  | 1.55777300  |
| H | -1.31254000 | 3.84001500  | 1.24125900  |
| H | 0.87985400  | -0.85024900 | 1.90232600  |
| C | 1.46258800  | -0.31908700 | 3.90305000  |
| C | 1.70677300  | 2.04529100  | 4.34286600  |
| H | 1.31414400  | 3.36136200  | 2.68879900  |
| H | -0.52607700 | 3.76641000  | -1.26077800 |
| C | 1.05465800  | 5.20078100  | -1.47357500 |
| C | 3.09580500  | 4.73073600  | -0.27277900 |
| H | 3.11217300  | 2.92753600  | 0.89540500  |
| C | 3.53234300  | -4.69945200 | 2.18477400  |
| H | 5.02270500  | -3.17952300 | 1.78438400  |
| C | 2.20622000  | -5.12887900 | 1.99132900  |
| H | 0.27980900  | -4.70563600 | 1.08500400  |
| P | -1.60525200 | -0.46515500 | -1.86555600 |
| C | -2.58956600 | -1.76828600 | 0.58342600  |
| H | -2.33633200 | 0.52173100  | 3.01172100  |
| C | -2.75381800 | -1.39863300 | 1.94605100  |
| H | 1.50226100  | -1.35161200 | 4.23629700  |
| C | 1.76288500  | 0.72103600  | 4.78403600  |
| H | 1.93267100  | 2.85808200  | 5.02696100  |

|    |             |             |             |
|----|-------------|-------------|-------------|
| H  | 0.47719100  | 5.83227100  | -2.14204800 |
| C  | 2.35926000  | 5.55461800  | -1.12704000 |
| H  | 4.11334600  | 4.99666600  | -0.00185200 |
| H  | 4.20818700  | -5.30822300 | 2.77835300  |
| H  | 1.88127400  | -6.06269800 | 2.44118700  |
| O  | -2.05337100 | 0.86289400  | -2.44269400 |
| C  | -2.09405000 | -1.95058600 | -2.86351600 |
| H  | -0.18714800 | -0.60329500 | -1.85347600 |
| H  | -2.86273700 | -2.71984100 | 0.15685200  |
| H  | -3.18249500 | -2.01749500 | 2.72195400  |
| H  | 2.03883600  | 0.50232600  | 5.81146200  |
| H  | 2.80142800  | 6.46374700  | -1.52295700 |
| C  | -3.61591200 | -2.14780800 | -2.84505400 |
| C  | -1.35809300 | -3.20622900 | -2.36911100 |
| C  | -1.62579300 | -1.62014500 | -4.29490200 |
| H  | -3.98394700 | -2.37280200 | -1.84179900 |
| H  | -3.88431600 | -2.98466600 | -3.50051000 |
| H  | -4.13758300 | -1.25796800 | -3.20883300 |
| H  | -0.27947000 | -3.04556400 | -2.30292300 |
| H  | -1.54490300 | -4.02832000 | -3.07043100 |
| H  | -1.69187400 | -3.52812500 | -1.38119100 |
| H  | -2.10424600 | -0.71370100 | -4.67399600 |
| H  | -1.87694700 | -2.45296300 | -4.96145700 |
| H  | -0.54001300 | -1.47622100 | -4.33467600 |
| Fe | -3.85153500 | -0.13472900 | 0.70707400  |
| C  | -5.85488500 | -0.30292200 | 1.21022500  |
| C  | -5.66479400 | -0.62800700 | -0.16766100 |
| C  | -5.40565500 | 1.03696200  | 1.41318900  |
| H  | -6.23403800 | -0.96815500 | 1.97377700  |
| H  | -5.87944800 | -1.58102100 | -0.62987900 |
| C  | -5.09523300 | 0.50998200  | -0.81539300 |
| C  | -4.93700600 | 1.53766800  | 0.16031300  |
| H  | -5.38532400 | 1.56347000  | 2.35741200  |
| H  | -4.76650000 | 0.57091500  | -1.84211600 |
| H  | -4.49932100 | 2.50967000  | -0.01657700 |

### TS6

|    |            |             |             |
|----|------------|-------------|-------------|
| Ni | 1.29890800 | 0.15323800  | -1.26487900 |
| H  | 3.52816800 | 1.32659600  | -2.17662200 |
| C  | 2.21181400 | -1.32309400 | -0.68547200 |
| C  | 2.65468700 | -0.60901400 | -2.47237300 |
| P  | 0.53070600 | 1.53834000  | 0.22665600  |
| N  | 3.34712600 | -1.25871400 | 0.11155700  |
| N  | 1.57029500 | -2.48429800 | -0.53335900 |

|   |             |             |             |
|---|-------------|-------------|-------------|
| C | 3.87754100  | 0.31743700  | -2.43665600 |
| H | 1.89135100  | -0.23429600 | -3.19055000 |
| H | 2.90334900  | -1.62063900 | -2.79724800 |
| C | -1.32665900 | 1.79017100  | 0.45114000  |
| C | 1.08320500  | 1.15900900  | 1.93056600  |
| C | 1.18460500  | 3.20267800  | -0.17845200 |
| C | 3.40019400  | -2.42074000 | 0.86152300  |
| C | 4.32405800  | -0.18826900 | 0.03752300  |
| C | 2.26430600  | -3.17139500 | 0.44885300  |
| C | 4.90987700  | -0.09231900 | -1.37301200 |
| C | 4.52921600  | 0.38907300  | -3.82479200 |
| C | -1.89551400 | 0.45613400  | 0.84485400  |
| H | -1.69184000 | 2.02086800  | -0.55405600 |
| C | -1.68202400 | 2.91495000  | 1.42328500  |
| C | 1.17205100  | -0.19673000 | 2.28389500  |
| C | 1.34984400  | 2.13698100  | 2.90099500  |
| C | 0.46415900  | 4.04444000  | -1.04132200 |
| C | 2.47649900  | 3.58651000  | 0.21570500  |
| C | 4.26732700  | -2.86701400 | 1.85725600  |
| H | 3.84266000  | 0.75527200  | 0.31935600  |
| H | 5.10695200  | -0.39279900 | 0.77083900  |
| C | 1.99365500  | -4.40363200 | 1.05629400  |
| H | 5.72626300  | 0.63997400  | -1.36838700 |
| H | 5.34833500  | -1.06427900 | -1.63523900 |
| H | 3.81449000  | 0.73676300  | -4.57828800 |
| H | 5.38263800  | 1.07707700  | -3.82666000 |
| H | 4.89125700  | -0.59787800 | -4.13642200 |
| C | -2.10853100 | -0.67950900 | -0.02948200 |
| C | -2.28000700 | 0.05852100  | 2.16034800  |
| H | -1.27282300 | 2.72963200  | 2.41957800  |
| H | -2.76841600 | 3.00018400  | 1.51639100  |
| H | -1.29121600 | 3.87362900  | 1.07490700  |
| H | 0.95323100  | -0.95850400 | 1.54533700  |
| C | 1.53660000  | -0.56829800 | 3.57755500  |
| C | 1.71963600  | 1.76235700  | 4.19316700  |
| H | 1.27700000  | 3.18903300  | 2.64725400  |
| H | -0.52531300 | 3.75786400  | -1.38377300 |
| C | 1.01375100  | 5.24960600  | -1.47808700 |
| C | 3.02316200  | 4.79219300  | -0.22263100 |
| H | 3.05514000  | 2.94255200  | 0.86973100  |
| C | 3.98032700  | -4.10120000 | 2.44590100  |
| H | 5.12551600  | -2.28168900 | 2.17319400  |
| C | 2.86019800  | -4.85569300 | 2.05161500  |
| H | 1.12580800  | -4.98220300 | 0.75439600  |

|    |             |             |             |
|----|-------------|-------------|-------------|
| P  | -1.75988600 | -0.62107500 | -1.79702500 |
| C  | -2.63769800 | -1.74576000 | 0.77343600  |
| H  | -2.26628900 | 0.69057600  | 3.03565100  |
| C  | -2.74369700 | -1.28600900 | 2.11422700  |
| H  | 1.61209100  | -1.62154400 | 3.82886400  |
| C  | 1.81671800  | 0.41071400  | 4.53238300  |
| H  | 1.93032700  | 2.52704900  | 4.93526200  |
| H  | 0.44022500  | 5.89094000  | -2.14078200 |
| C  | 2.29314200  | 5.62930900  | -1.06868800 |
| H  | 4.02112100  | 5.07709800  | 0.09797500  |
| H  | 4.63318000  | -4.48225800 | 3.22567100  |
| H  | 2.66744000  | -5.80922700 | 2.53496700  |
| O  | -2.28413200 | 0.63040500  | -2.46904100 |
| C  | -2.22251200 | -2.20598300 | -2.64149200 |
| H  | -0.32827400 | -0.71473100 | -1.82676000 |
| H  | -2.94697500 | -2.71608100 | 0.42072600  |
| H  | -3.14818200 | -1.84692400 | 2.94512300  |
| H  | 2.10984700  | 0.12300100  | 5.53788600  |
| H  | 2.71949500  | 6.56799000  | -1.40925600 |
| C  | -3.74420400 | -2.40747600 | -2.62105300 |
| C  | -1.48184100 | -3.39881100 | -2.01389300 |
| C  | -1.73969200 | -2.01436400 | -4.09370800 |
| H  | -4.12349600 | -2.52922900 | -1.60369900 |
| H  | -4.00261900 | -3.30980100 | -3.18777500 |
| H  | -4.26441200 | -1.56224500 | -3.08120800 |
| H  | -0.42083800 | -3.18919000 | -1.84394100 |
| H  | -1.56188300 | -4.26222300 | -2.68525300 |
| H  | -1.91033200 | -3.69245800 | -1.05355000 |
| H  | -2.20900200 | -1.14512600 | -4.56167700 |
| H  | -1.99148400 | -2.90468800 | -4.68073500 |
| H  | -0.65247500 | -1.88304400 | -4.13708800 |
| Fe | -3.87425600 | -0.09488800 | 0.83349400  |
| C  | -5.86399000 | -0.20187200 | 1.40439300  |
| C  | -5.71705300 | -0.62129500 | 0.04659100  |
| C  | -5.39256200 | 1.14212700  | 1.50374700  |
| H  | -6.22898600 | -0.80885200 | 2.22139900  |
| H  | -5.95525000 | -1.60064900 | -0.34357800 |
| C  | -5.15256400 | 0.46240900  | -0.69229900 |
| C  | -4.95341300 | 1.55067400  | 0.20749700  |
| H  | -5.33888500 | 1.73051200  | 2.40937200  |
| H  | -4.83975100 | 0.44766900  | -1.72578300 |
| H  | -4.50475500 | 2.50065000  | -0.04532100 |

|    |             |             |             |
|----|-------------|-------------|-------------|
| Ni | 0.92866700  | -0.65376200 | -0.73138300 |
| H  | 3.74059800  | 1.06036500  | -1.11729300 |
| C  | 2.76473100  | -1.50070300 | -1.11650500 |
| C  | 3.43185900  | -0.73889000 | -2.22739600 |
| P  | 0.75848900  | 1.21381400  | 0.28645300  |
| N  | 3.54834100  | -1.83823000 | -0.00104300 |
| N  | 1.71181700  | -2.36771200 | -1.26244100 |
| C  | 4.36487000  | 0.34041800  | -1.65651300 |
| H  | 2.67051200  | -0.29512500 | -2.87392400 |
| H  | 4.01879900  | -1.43895200 | -2.84348600 |
| C  | -1.02565400 | 1.80899600  | 0.51457300  |
| C  | 1.40895400  | 1.16422100  | 2.00439200  |
| C  | 1.54633800  | 2.64659900  | -0.54858100 |
| C  | 2.86286600  | -2.81098600 | 0.70008600  |
| C  | 4.58737300  | -0.96055400 | 0.51435700  |
| C  | 1.72981000  | -3.14329800 | -0.08990600 |
| C  | 5.33186000  | -0.29740800 | -0.64658000 |
| C  | 5.10214800  | 1.08840100  | -2.76521700 |
| C  | -1.81925500 | 0.59445800  | 0.89150000  |
| H  | -1.32480000 | 2.09326100  | -0.49766000 |
| C  | -1.20524100 | 3.00225900  | 1.44815800  |
| C  | 1.56955100  | -0.10943900 | 2.57246800  |
| C  | 1.69329100  | 2.29354500  | 2.78980800  |
| C  | 0.96959200  | 3.07203600  | -1.75905200 |
| C  | 2.75910500  | 3.21915200  | -0.14005800 |
| C  | 3.09776700  | -3.40541100 | 1.93922300  |
| H  | 4.13141500  | -0.19797500 | 1.16178000  |
| H  | 5.27016100  | -1.55519300 | 1.12789100  |
| C  | 0.83286200  | -4.11694700 | 0.35352500  |
| H  | 6.01052400  | 0.46027000  | -0.23923500 |
| H  | 5.94978800  | -1.04677400 | -1.15879200 |
| H  | 4.39395700  | 1.55222800  | -3.46003800 |
| H  | 5.73174500  | 1.88437900  | -2.35301900 |
| H  | 5.74724700  | 0.41336000  | -3.34090000 |
| C  | -2.19511400 | -0.46964000 | -0.01753900 |
| C  | -2.26013500 | 0.21971200  | 2.19391300  |
| H  | -0.90566900 | 2.77161000  | 2.47315100  |
| H  | -2.25471400 | 3.31143500  | 1.46542300  |
| H  | -0.60814100 | 3.85135700  | 1.10334700  |
| H  | 1.35615800  | -0.98593200 | 1.96907100  |
| C  | 2.00536700  | -0.25527800 | 3.88953300  |
| C  | 2.13895600  | 2.14728200  | 4.10380500  |
| H  | 1.57214500  | 3.28862500  | 2.37719000  |
| H  | 0.05108600  | 2.61249100  | -2.11635400 |

|    |             |             |             |
|----|-------------|-------------|-------------|
| C  | 1.58096600  | 4.06456800  | -2.52236500 |
| C  | 3.37220100  | 4.20855500  | -0.91192400 |
| H  | 3.23789200  | 2.88403400  | 0.77301400  |
| C  | 2.18387500  | -4.37183900 | 2.37049600  |
| H  | 3.95066400  | -3.12595100 | 2.54947200  |
| C  | 1.07167200  | -4.72436200 | 1.58910900  |
| H  | -0.02958000 | -4.38225800 | -0.24817700 |
| P  | -1.83958500 | -0.38031000 | -1.78314200 |
| C  | -2.87352400 | -1.47482200 | 0.75400000  |
| H  | -2.15993100 | 0.82071100  | 3.08563400  |
| C  | -2.91224600 | -1.04426500 | 2.10874000  |
| H  | 2.12350300  | -1.25117600 | 4.30577400  |
| C  | 2.29498000  | 0.87382800  | 4.65675000  |
| H  | 2.36206400  | 3.02932000  | 4.69723900  |
| H  | 1.12022400  | 4.38510400  | -3.45221800 |
| C  | 2.78425600  | 4.63736400  | -2.10147700 |
| H  | 4.31270900  | 4.64030400  | -0.58161000 |
| H  | 2.33912200  | -4.85832700 | 3.32893700  |
| H  | 0.38254600  | -5.48002200 | 1.95422000  |
| O  | -2.16007700 | 0.96708700  | -2.39431100 |
| C  | -2.53807600 | -1.83904400 | -2.69058000 |
| H  | -0.43061800 | -0.70401300 | -1.87414400 |
| H  | -3.31331100 | -2.38437900 | 0.37634900  |
| H  | -3.39507600 | -1.56651500 | 2.92300400  |
| H  | 2.64210100  | 0.76481500  | 5.68018600  |
| H  | 3.26223400  | 5.40624500  | -2.70110500 |
| C  | -4.06850700 | -1.88205200 | -2.58135100 |
| C  | -1.89144400 | -3.13123200 | -2.16657400 |
| C  | -2.12472300 | -1.62216700 | -4.15915500 |
| H  | -4.40328500 | -2.04754800 | -1.55540900 |
| H  | -4.45521900 | -2.70104700 | -3.19909500 |
| H  | -4.51812400 | -0.95200200 | -2.94051100 |
| H  | -0.80061900 | -3.08469500 | -2.23196800 |
| H  | -2.23056800 | -3.97835400 | -2.77433500 |
| H  | -2.15846400 | -3.33974600 | -1.12838400 |
| H  | -2.53980700 | -0.69342000 | -4.55841500 |
| H  | -2.49039900 | -2.45775600 | -4.76664100 |
| H  | -1.03485300 | -1.58292700 | -4.26524200 |
| Fe | -3.86180100 | 0.33136300  | 0.86854100  |
| C  | -5.84516000 | 0.48612500  | 1.44925300  |
| C  | -5.76076300 | 0.09196500  | 0.07846800  |
| C  | -5.19007900 | 1.74719800  | 1.58576300  |
| H  | -6.29007100 | -0.08861200 | 2.24982100  |
| H  | -6.13243400 | -0.83285000 | -0.33938800 |

|   |             |            |             |
|---|-------------|------------|-------------|
| C | -5.05407600 | 1.10968000 | -0.63126900 |
| C | -4.70242200 | 2.13137300 | 0.29930500  |
| H | -5.05033600 | 2.29243600 | 2.50894400  |
| H | -4.75404700 | 1.08646800 | -1.66822300 |
| H | -4.13001000 | 3.01856000 | 0.06992400  |

**TS7**

|    |             |             |             |
|----|-------------|-------------|-------------|
| Ni | 1.43052200  | 0.33781000  | 1.39387800  |
| Fe | -3.81787000 | -0.60425500 | -1.03484500 |
| P  | -1.69526500 | -1.85862000 | 1.32165100  |
| P  | 0.50124200  | 1.33786500  | -0.33353000 |
| O  | -2.35655400 | -3.20595200 | 1.13663400  |
| C  | -2.52589500 | -0.44544900 | 0.55763200  |
| C  | -2.06586500 | 0.36973500  | -0.54805500 |
| C  | -3.09273400 | 1.32865300  | -0.81979900 |
| H  | -3.06589700 | 2.07508300  | -1.59914000 |
| C  | -4.17459600 | 1.11342700  | 0.07811500  |
| H  | -5.11173900 | 1.65251400  | 0.08251500  |
| C  | -3.83529800 | 0.02083100  | 0.92202000  |
| H  | -4.47106000 | -0.42235500 | 1.67426000  |
| C  | -0.75131500 | 0.29217300  | -1.28230200 |
| H  | -0.34502700 | -0.72166200 | -1.20630700 |
| C  | -0.88710800 | 0.68008500  | -2.75815900 |
| H  | -1.24114600 | 1.70648200  | -2.87869700 |
| H  | -1.61239200 | 0.01979300  | -3.23796000 |
| H  | 0.06282600  | 0.59035800  | -3.28604900 |
| C  | -5.35694200 | -1.97354400 | -1.24128300 |
| H  | -6.07501800 | -2.18315600 | -0.46056800 |
| C  | -4.09942300 | -2.62311000 | -1.41294000 |
| H  | -3.67013500 | -3.36027200 | -0.74896500 |
| C  | -3.43194700 | -2.00032500 | -2.50978400 |
| H  | -2.43954000 | -2.24437300 | -2.86297400 |
| C  | -4.27978000 | -0.96937700 | -3.02026300 |
| H  | -4.04726200 | -0.29463100 | -3.83252400 |
| C  | -5.47086500 | -0.95118200 | -2.23316700 |
| H  | -6.29272100 | -0.25668800 | -2.34146800 |
| C  | -0.34175700 | 2.94911600  | -0.14472600 |
| C  | -0.89895600 | 3.25483100  | 1.10403900  |
| H  | -0.74919500 | 2.57183400  | 1.93244400  |
| C  | -1.64768700 | 4.41835600  | 1.28020600  |
| H  | -2.07958500 | 4.64067400  | 2.25141700  |
| C  | -1.83843200 | 5.29413700  | 0.21060500  |
| H  | -2.41867900 | 6.20183400  | 0.34703500  |
| C  | -1.27603500 | 5.00471200  | -1.03490400 |



|   |             |             |             |
|---|-------------|-------------|-------------|
| H | -1.41558700 | 5.68779400  | -1.86755800 |
| C | -0.53410100 | 3.83770000  | -1.21434700 |
| H | -0.09699600 | 3.62376100  | -2.18363600 |
| C | 1.90699700  | 1.65381100  | -1.46419500 |
| C | 2.43554200  | 0.60184700  | -2.22921700 |
| H | 1.94725800  | -0.36551200 | -2.23739300 |
| C | 3.61225100  | 0.77639500  | -2.95537100 |
| H | 4.01093600  | -0.05388300 | -3.52943800 |
| C | 4.28121800  | 2.00172100  | -2.92527900 |
| H | 5.19960400  | 2.13585300  | -3.48894800 |
| C | 3.76670900  | 3.05213600  | -2.16339300 |
| H | 4.28160200  | 4.00797100  | -2.13304900 |
| C | 2.58982800  | 2.88021200  | -1.43293900 |
| H | 2.20462800  | 3.70168800  | -0.83840100 |
| C | -1.47124700 | -1.43535400 | 3.12304400  |
| C | -2.76250700 | -1.78597600 | 3.87862900  |
| H | -3.59294100 | -1.13559600 | 3.58835100  |
| H | -2.60474500 | -1.65861100 | 4.95625100  |
| H | -3.05778900 | -2.82121000 | 3.69111700  |
| C | -1.13152200 | 0.04687200  | 3.30680600  |
| H | -0.24545400 | 0.33632800  | 2.72126400  |
| H | -0.90659700 | 0.25154400  | 4.36030900  |
| H | -1.95730800 | 0.69374100  | 3.00036500  |
| C | -0.31760200 | -2.31829200 | 3.63278800  |
| H | -0.53712400 | -3.37997600 | 3.48652800  |
| H | -0.16312200 | -2.14685800 | 4.70472800  |
| H | 0.61686600  | -2.08802300 | 3.11271600  |
| H | -0.39575700 | -1.76244400 | 0.78887700  |
| C | 3.89048300  | -1.97051300 | -0.64360600 |
| C | 2.71439200  | -2.70476500 | -0.95301600 |
| C | 2.77396400  | -3.76276600 | -1.86615900 |
| C | 4.00339300  | -4.05790300 | -2.45404800 |
| C | 5.15862100  | -3.31567000 | -2.14454200 |
| C | 5.12114000  | -2.25691700 | -1.23570000 |
| C | 2.09585400  | -1.14897400 | 0.43738700  |
| H | 1.87897400  | -4.32933600 | -2.10481100 |
| H | 4.07384400  | -4.87483300 | -3.16629100 |
| H | 6.09943300  | -3.56990600 | -2.62407100 |
| H | 6.01428400  | -1.68295200 | -1.00816900 |
| H | 2.01666500  | -0.67996600 | 2.24977300  |
| N | 3.47789900  | -1.00576500 | 0.26322700  |
| N | 1.62830800  | -2.17060000 | -0.26319300 |
| C | 4.27928500  | 0.09644700  | 0.78959400  |
| H | 5.31995200  | -0.10804900 | 0.52985800  |

|   |            |             |            |
|---|------------|-------------|------------|
| H | 3.99560400 | 1.02423200  | 0.28138600 |
| C | 4.18797600 | 0.26458100  | 2.31739800 |
| H | 4.43644500 | -0.69717100 | 2.77907100 |
| H | 4.97148600 | 0.97371500  | 2.61687100 |
| C | 2.60287400 | 0.32150500  | 4.33107200 |
| H | 1.60585700 | 0.61694900  | 4.66565200 |
| H | 2.70393700 | -0.75988900 | 4.46062100 |
| H | 3.33639700 | 0.80555100  | 4.98899900 |
| C | 2.85490700 | 0.75250900  | 2.89761700 |
| C | 2.22121400 | 1.91801500  | 2.42203600 |
| H | 1.53108000 | 2.44702600  | 3.07328900 |
| H | 2.68423100 | 2.51995000  | 1.64420900 |

#### 14

|    |             |             |             |
|----|-------------|-------------|-------------|
| Ni | 1.38552400  | 0.34211000  | 1.31998800  |
| Fe | -3.82201400 | -0.60643500 | -1.01813100 |
| P  | -1.62749100 | -1.98987200 | 1.19102400  |
| P  | 0.47121000  | 1.39997700  | -0.29815400 |
| O  | -2.28363700 | -3.32842600 | 0.93742800  |
| C  | -2.49408600 | -0.53836900 | 0.55023900  |
| C  | -2.07675900 | 0.36691300  | -0.50120000 |
| C  | -3.12840600 | 1.32127500  | -0.67590100 |
| H  | -3.13271900 | 2.12502600  | -1.39611000 |
| C  | -4.18318800 | 1.01713400  | 0.22863600  |
| H  | -5.12967000 | 1.53529900  | 0.29604600  |
| C  | -3.80136100 | -0.12725100 | 0.98052300  |
| H  | -4.40743200 | -0.63694200 | 1.71532500  |
| C  | -0.77915200 | 0.37366700  | -1.26858800 |
| H  | -0.34261900 | -0.62953000 | -1.26846200 |
| C  | -0.95658300 | 0.85708200  | -2.71264400 |
| H  | -1.33665200 | 1.88034200  | -2.75655800 |
| H  | -1.67729500 | 0.21263100  | -3.21995700 |
| H  | -0.01624200 | 0.82439000  | -3.26417600 |
| C  | -5.31025800 | -2.02134600 | -1.27004700 |
| H  | -5.97602800 | -2.33199100 | -0.47678900 |
| C  | -4.03776800 | -2.59495300 | -1.56144300 |
| H  | -3.54664500 | -3.36744900 | -0.98653800 |
| C  | -3.45671200 | -1.84900400 | -2.62997900 |
| H  | -2.47656600 | -2.01755300 | -3.05380500 |
| C  | -4.37179900 | -0.81631700 | -3.00260700 |
| H  | -4.21050600 | -0.06309400 | -3.76154800 |
| C  | -5.51921300 | -0.92282800 | -2.15957000 |
| H  | -6.37478400 | -0.26142400 | -2.16608100 |
| C  | -0.40283200 | 2.97448700  | 0.00924800  |

|   |             |             |             |
|---|-------------|-------------|-------------|
| C | -0.95518300 | 3.18557800  | 1.27920500  |
| H | -0.77318700 | 2.45854600  | 2.06196500  |
| C | -1.73574300 | 4.31318500  | 1.53138500  |
| H | -2.16375800 | 4.46338100  | 2.51795400  |
| C | -1.96293800 | 5.24600600  | 0.51840500  |
| H | -2.56773400 | 6.12624000  | 0.71493500  |
| C | -1.40552400 | 5.04991500  | -0.74716400 |
| H | -1.57309700 | 5.77800200  | -1.53525900 |
| C | -0.63184100 | 3.91838300  | -1.00424100 |
| H | -0.19994000 | 3.77581000  | -1.98879400 |
| C | 1.85576800  | 1.79889500  | -1.42447100 |
| C | 2.39377100  | 0.79551600  | -2.24695200 |
| H | 1.92855800  | -0.18234600 | -2.29020700 |
| C | 3.55292200  | 1.03417300  | -2.98252300 |
| H | 3.96106100  | 0.24349400  | -3.60404100 |
| C | 4.19284500  | 2.27302800  | -2.90369500 |
| H | 5.09801400  | 2.45612100  | -3.47488200 |
| C | 3.66806200  | 3.27326000  | -2.08381000 |
| H | 4.16192000  | 4.23803900  | -2.01489400 |
| C | 2.50831500  | 3.03858200  | -1.34358800 |
| H | 2.11513100  | 3.81871200  | -0.70076600 |
| C | -1.35932300 | -1.68499100 | 3.01251000  |
| C | -2.59596100 | -2.18132400 | 3.77684800  |
| H | -3.48168300 | -1.58137800 | 3.54627100  |
| H | -2.41736400 | -2.10732800 | 4.85624100  |
| H | -2.81841100 | -3.22208700 | 3.53027700  |
| C | -1.11275000 | -0.20097100 | 3.30239200  |
| H | -0.30043300 | 0.20875200  | 2.68477200  |
| H | -0.82714400 | -0.06625900 | 4.35275900  |
| H | -2.00257000 | 0.40395400  | 3.11028800  |
| C | -0.12865400 | -2.51788700 | 3.41523700  |
| H | -0.27170600 | -3.57799400 | 3.18514200  |
| H | 0.04811000  | -2.42543500 | 4.49346100  |
| H | 0.76995400  | -2.17782900 | 2.89158900  |
| H | -0.34627500 | -1.84510900 | 0.62779200  |
| C | 3.93446500  | -1.91372300 | -0.70370600 |
| C | 2.78984200  | -2.64780500 | -1.11383900 |
| C | 2.92592000  | -3.69769900 | -2.02882300 |
| C | 4.19840600  | -3.98484400 | -2.52025300 |
| C | 5.32294300  | -3.24294900 | -2.11198200 |
| C | 5.20989200  | -2.19558900 | -1.19659400 |
| C | 2.05178200  | -1.12041900 | 0.26330500  |
| H | 2.05460100  | -4.26508900 | -2.34204500 |
| H | 4.32788900  | -4.79447300 | -3.23268000 |

|   |            |             |             |
|---|------------|-------------|-------------|
| H | 6.30003200 | -3.49039800 | -2.51689600 |
| H | 6.08302600 | -1.62833700 | -0.88799900 |
| H | 2.19352400 | -0.43952600 | 2.54313200  |
| N | 3.44793300 | -0.96405700 | 0.18286000  |
| N | 1.65298600 | -2.12820400 | -0.50142300 |
| C | 4.19726100 | 0.16692300  | 0.73325200  |
| H | 5.23584900 | 0.05615100  | 0.41510800  |
| H | 3.82357900 | 1.09072000  | 0.27881600  |
| C | 4.17247700 | 0.28038900  | 2.26923800  |
| H | 4.59838000 | -0.63853100 | 2.68892500  |
| H | 4.83733500 | 1.10561100  | 2.55220300  |
| C | 2.78662200 | 0.23708600  | 4.42340800  |
| H | 1.78021000 | 0.34615500  | 4.83602400  |
| H | 3.14318900 | -0.77378200 | 4.64630600  |
| H | 3.44225600 | 0.95263100  | 4.93033200  |
| C | 2.78982400 | 0.51430100  | 2.91387800  |
| C | 2.02076800 | 1.73440300  | 2.50153000  |
| H | 1.39095300 | 2.16790800  | 3.27749900  |
| H | 2.56637100 | 2.49435300  | 1.94084600  |

## 15

|    |            |             |             |
|----|------------|-------------|-------------|
| Fe | 3.59292000 | -1.69234100 | -0.41904400 |
| P  | 0.55522800 | -1.82744200 | 1.09550800  |
| P  | 0.58725000 | 1.91022100  | 0.36633900  |
| O  | 1.28448600 | -1.69914300 | 2.41434400  |
| C  | 1.57318600 | -1.36009900 | -0.32648400 |
| C  | 2.28895200 | -0.10373100 | -0.35869800 |
| C  | 3.03181300 | -0.05972400 | -1.57672600 |
| H  | 3.69708700 | 0.73527100  | -1.87995000 |
| C  | 2.79561100 | -1.26848500 | -2.29394900 |
| H  | 3.25491000 | -1.55164100 | -3.23083000 |
| C  | 1.89808000 | -2.06849500 | -1.53295400 |
| H  | 1.56260900 | -3.05698000 | -1.80388100 |
| C  | 2.18646000 | 0.97298500  | 0.68431700  |
| H  | 2.01987900 | 0.47472800  | 1.64498000  |
| C  | 3.41599200 | 1.87862600  | 0.76921100  |
| H  | 3.61444500 | 2.37578000  | -0.18299000 |
| H  | 4.29588100 | 1.28734000  | 1.03633300  |
| H  | 3.28196100 | 2.65904100  | 1.52259800  |
| C  | 4.48955500 | -3.50708800 | 0.02764700  |
| H  | 4.12448300 | -4.46530100 | -0.31485800 |
| C  | 4.09669300 | -2.84041100 | 1.22640100  |
| H  | 3.35531500 | -3.16914400 | 1.93877500  |
| C  | 4.77014300 | -1.58433400 | 1.27204200  |

|    |             |             |             |
|----|-------------|-------------|-------------|
| H  | 4.64060000  | -0.83291800 | 2.03734000  |
| C  | 5.58246400  | -1.47256500 | 0.10241900  |
| H  | 6.18817800  | -0.62053100 | -0.17442900 |
| C  | 5.40712300  | -2.66148100 | -0.66891000 |
| H  | 5.85848400  | -2.86736000 | -1.62973200 |
| C  | 1.09142600  | 3.28961300  | -0.72385900 |
| C  | 1.35487800  | 3.00344900  | -2.07394800 |
| H  | 1.23401800  | 1.99318500  | -2.44721500 |
| C  | 1.77598200  | 4.01375100  | -2.93772400 |
| H  | 1.97992200  | 3.78064300  | -3.97865300 |
| C  | 1.92613900  | 5.32034600  | -2.46868100 |
| H  | 2.24734000  | 6.10784800  | -3.14377700 |
| C  | 1.66067000  | 5.61133900  | -1.12972800 |
| H  | 1.77722900  | 6.62548500  | -0.75912300 |
| C  | 1.25001000  | 4.60174400  | -0.25851700 |
| H  | 1.05355600  | 4.83450600  | 0.78236900  |
| C  | 0.12363800  | 2.67758200  | 1.96093600  |
| C  | 0.84241700  | 2.51149700  | 3.15259200  |
| H  | 1.77124800  | 1.95328800  | 3.16586100  |
| C  | 0.36075300  | 3.05439400  | 4.34457400  |
| H  | 0.92468100  | 2.91566800  | 5.26195500  |
| C  | -0.83903400 | 3.76622400  | 4.36117600  |
| H  | -1.21104100 | 4.18348400  | 5.29191900  |
| C  | -1.56580100 | 3.93157500  | 3.18017100  |
| H  | -2.50544000 | 4.47543000  | 3.18742600  |
| C  | -1.09301400 | 3.38432100  | 1.98951000  |
| H  | -1.66823300 | 3.49968500  | 1.07466500  |
| C  | -0.27496100 | -3.45324800 | 0.80064600  |
| C  | 0.76891300  | -4.57851500 | 0.74103200  |
| H  | 1.45626100  | -4.46629500 | -0.10128600 |
| H  | 0.25808900  | -5.54228200 | 0.63271800  |
| H  | 1.36116100  | -4.61575400 | 1.65996900  |
| C  | -1.12930400 | -3.39025700 | -0.47584600 |
| H  | -1.85106300 | -2.57197500 | -0.41918100 |
| H  | -1.69381900 | -4.32480500 | -0.57489200 |
| H  | -0.53178600 | -3.26661300 | -1.38131000 |
| C  | -1.20103500 | -3.65206200 | 2.01773300  |
| H  | -0.63434400 | -3.66518000 | 2.95269800  |
| H  | -1.72552800 | -4.60947900 | 1.91783200  |
| H  | -1.94993500 | -2.85537900 | 2.06832900  |
| H  | -0.54191500 | -0.92554600 | 0.97065100  |
| Ni | -1.32124400 | 0.73428500  | -0.09472200 |
| C  | -5.17594800 | -0.53634600 | -0.36886900 |
| C  | -4.66992200 | -1.23641000 | 0.75977100  |

|   |             |             |             |
|---|-------------|-------------|-------------|
| C | -5.50660300 | -2.10694600 | 1.46887400  |
| C | -6.82116800 | -2.25981600 | 1.03260800  |
| C | -7.30688100 | -1.55979800 | -0.08920900 |
| C | -6.49255300 | -0.68539800 | -0.80894200 |
| C | -3.01997300 | -0.02825400 | -0.00058600 |
| H | -5.13074000 | -2.64470600 | 2.33426800  |
| H | -7.48761800 | -2.93183600 | 1.56573200  |
| H | -8.33690000 | -1.70540600 | -0.40186200 |
| H | -6.87049800 | -0.15030600 | -1.67503200 |
| H | -2.32752000 | -1.23140000 | -2.29443300 |
| N | -4.11215000 | 0.22749700  | -0.81495300 |
| N | -3.33361100 | -0.90784800 | 0.95196200  |
| C | -4.05659900 | 1.09189800  | -1.97945400 |
| H | -5.07153900 | 1.41626700  | -2.22501400 |
| H | -3.48675000 | 1.98101400  | -1.69626600 |
| C | -3.39336400 | 0.40943200  | -3.17986500 |
| H | -4.09029000 | -0.30949400 | -3.62761200 |
| H | -3.20273800 | 1.18098000  | -3.93881000 |
| C | -1.37690000 | -0.74171800 | -4.14429500 |
| H | -0.49173800 | -1.35129700 | -3.93387300 |
| H | -2.04702800 | -1.32956700 | -4.78326300 |
| H | -1.04965200 | 0.13373000  | -4.71879400 |
| C | -2.07775700 | -0.31579000 | -2.84246100 |
| C | -1.12257000 | 0.51665300  | -1.98952400 |
| H | -0.12160400 | 0.06854200  | -1.99717600 |
| H | -1.04847600 | 1.54731300  | -2.36092500 |

### TS8

|    |             |             |             |
|----|-------------|-------------|-------------|
| Ni | 1.22125600  | 0.56920700  | -0.03418600 |
| Fe | -3.69771100 | -1.59183700 | 0.21508400  |
| P  | -0.57087800 | -1.60885800 | -1.12891300 |
| P  | -0.54464800 | 1.91059900  | -0.03632400 |
| O  | -1.14169200 | -1.20280600 | -2.46746700 |
| C  | -1.67052900 | -1.28372100 | 0.25756100  |
| C  | -2.37676300 | -0.02763900 | 0.40434400  |
| C  | -3.16651600 | -0.11929100 | 1.58797500  |
| H  | -3.83070100 | 0.64752700  | 1.95821600  |
| C  | -2.98246300 | -1.40970700 | 2.16093800  |
| H  | -3.48786300 | -1.79387200 | 3.03598300  |
| C  | -2.06370500 | -2.12976800 | 1.34969200  |
| H  | -1.75589200 | -3.15006100 | 1.50871800  |
| C  | -2.21987200 | 1.17235700  | -0.48406000 |
| H  | -2.08521700 | 0.80715300  | -1.50672000 |
| C  | -3.39439400 | 2.14627200  | -0.42270200 |

|   |             |             |             |
|---|-------------|-------------|-------------|
| H | -3.53672600 | 2.54541300  | 0.58428200  |
| H | -4.31738500 | 1.63747300  | -0.71638000 |
| H | -3.23777600 | 2.99014700  | -1.09914500 |
| C | -4.53254200 | -3.31588800 | -0.57178200 |
| H | -4.13053100 | -4.30786200 | -0.42078500 |
| C | -4.17574000 | -2.41618900 | -1.62162900 |
| H | -3.43020600 | -2.57908500 | -2.38558300 |
| C | -4.89680200 | -1.20182000 | -1.42365800 |
| H | -4.81934100 | -0.31618900 | -2.03826100 |
| C | -5.69942800 | -1.34776700 | -0.25126400 |
| H | -6.33415100 | -0.58847500 | 0.18427100  |
| C | -5.47392100 | -2.65533700 | 0.27572800  |
| H | -5.90656000 | -3.05855900 | 1.18092200  |
| C | -0.83077000 | 2.61493200  | 1.62897500  |
| C | -0.35476900 | 1.87627000  | 2.72332400  |
| H | 0.21002200  | 0.96469900  | 2.54481000  |
| C | -0.59500300 | 2.31111400  | 4.02717300  |
| H | -0.22197500 | 1.73017000  | 4.86526100  |
| C | -1.30200500 | 3.49372000  | 4.24985100  |
| H | -1.48332100 | 3.83659600  | 5.26433100  |
| C | -1.76781300 | 4.24242700  | 3.16606700  |
| H | -2.31149300 | 5.16716000  | 3.33658600  |
| C | -1.53666300 | 3.80544800  | 1.86202500  |
| H | -1.89484000 | 4.39540400  | 1.02496800  |
| C | -0.34681700 | 3.34969000  | -1.15027900 |
| C | -0.77770400 | 3.28170200  | -2.48471500 |
| H | -1.32919600 | 2.41631200  | -2.83831500 |
| C | -0.49175500 | 4.31744900  | -3.37400500 |
| H | -0.83828900 | 4.25286500  | -4.40127300 |
| C | 0.23792000  | 5.42925500  | -2.94893500 |
| H | 0.46043100  | 6.23395000  | -3.64318900 |
| C | 0.68469900  | 5.49787700  | -1.62823500 |
| H | 1.25725800  | 6.35664200  | -1.28993500 |
| C | 0.39844400  | 4.46525500  | -0.73509000 |
| H | 0.75031200  | 4.52893600  | 0.28963100  |
| C | 0.13888900  | -3.32002300 | -1.05938500 |
| C | -0.95849300 | -4.36084100 | -1.32307000 |
| H | -1.73116200 | -4.34095100 | -0.55091300 |
| H | -0.51508800 | -5.36324800 | -1.33250200 |
| H | -1.43829600 | -4.19575500 | -2.29211000 |
| C | 0.84806300  | -3.56517000 | 0.28284700  |
| H | 1.46261600  | -2.71509400 | 0.58651200  |
| H | 1.51228600  | -4.43114400 | 0.18786600  |
| H | 0.14830500  | -3.77637500 | 1.09323600  |

|   |            |             |             |
|---|------------|-------------|-------------|
| C | 1.18006800 | -3.35014500 | -2.19631700 |
| H | 0.72932300 | -3.10619400 | -3.16194500 |
| H | 1.61628500 | -4.35307400 | -2.25914900 |
| H | 1.99383300 | -2.64461500 | -2.00174700 |
| H | 0.63424900 | -0.86795500 | -0.80378900 |
| C | 4.28504200 | -1.92667300 | 0.14240300  |
| C | 3.84382200 | -1.82205800 | 1.49249300  |
| C | 4.32253900 | -2.73009500 | 2.44566800  |
| C | 5.23508000 | -3.70135600 | 2.03550400  |
| C | 5.66913300 | -3.78205000 | 0.69914800  |
| C | 5.19722000 | -2.89599600 | -0.27176400 |
| C | 2.79501400 | -0.26976900 | 0.39336900  |
| H | 3.98620100 | -2.66782200 | 3.47621000  |
| H | 5.62036600 | -4.41248100 | 2.76058700  |
| H | 6.38256600 | -4.55028200 | 0.41578000  |
| H | 5.52659000 | -2.96508500 | -1.30418400 |
| H | 5.00127700 | 0.99217700  | 0.48645800  |
| N | 3.58891300 | -0.94418000 | -0.53736200 |
| N | 2.95183200 | -0.77019700 | 1.62551400  |
| C | 3.87604800 | -0.34078300 | -1.82474800 |
| H | 4.42134300 | -1.05696700 | -2.44245300 |
| H | 2.91862300 | -0.14418500 | -2.31550400 |
| C | 4.66320100 | 0.97809400  | -1.63522600 |
| H | 5.73467600 | 0.79987900  | -1.77530400 |
| H | 4.35235000 | 1.68958100  | -2.41036200 |
| C | 5.01849500 | 3.02104100  | -0.19292700 |
| H | 4.92969700 | 3.44565600  | 0.81256200  |
| H | 6.07941400 | 3.02958000  | -0.46863800 |
| H | 4.48504700 | 3.68185900  | -0.88649800 |
| C | 4.44912700 | 1.59855900  | -0.24182000 |
| C | 2.96626200 | 1.61903100  | 0.17267500  |
| H | 2.84590800 | 2.03929400  | 1.17311200  |
| H | 2.43594500 | 2.25333700  | -0.55622900 |

## 16

|    |             |             |             |
|----|-------------|-------------|-------------|
| Ni | 1.13373100  | 0.28597000  | 0.67871900  |
| Fe | -4.10235900 | -1.05976600 | -0.41393600 |
| P  | -0.79094300 | -1.75960300 | -0.82618900 |
| P  | -0.32288800 | 1.74227000  | 0.38646800  |
| O  | -0.94392600 | -1.41199900 | -2.29390700 |
| C  | -2.15621500 | -1.19148200 | 0.21034600  |
| C  | -2.57836300 | 0.19250500  | 0.20477100  |
| C  | -3.68122700 | 0.30740000  | 1.10201100  |
| H  | -4.24055100 | 1.21088300  | 1.29597600  |



|   |             |             |             |
|---|-------------|-------------|-------------|
| C | -3.95440400 | -0.97581700 | 1.65696100  |
| H | -4.76101000 | -1.21599200 | 2.33575300  |
| C | -3.01773500 | -1.90102400 | 1.11662200  |
| H | -2.99572200 | -2.95905700 | 1.32547100  |
| C | -1.91590900 | 1.29872900  | -0.55871700 |
| H | -1.54733400 | 0.86938000  | -1.49514400 |
| C | -2.83847000 | 2.47664900  | -0.86445300 |
| H | -3.21667000 | 2.94225100  | 0.04840000  |
| H | -3.69924400 | 2.13959500  | -1.45002300 |
| H | -2.31288100 | 3.24398700  | -1.43846100 |
| C | -5.03498100 | -2.58603800 | -1.45630900 |
| H | -4.94273400 | -3.63440400 | -1.20859400 |
| C | -4.17109800 | -1.85068900 | -2.32313700 |
| H | -3.27900600 | -2.21344600 | -2.81186100 |
| C | -4.61046200 | -0.49398100 | -2.33263300 |
| H | -4.12800400 | 0.31704700  | -2.85897700 |
| C | -5.74642000 | -0.38755500 | -1.47273700 |
| H | -6.28542200 | 0.52027900  | -1.23857200 |
| C | -6.00900400 | -1.68209200 | -0.92964400 |
| H | -6.78319100 | -1.92583500 | -0.21516000 |
| C | -1.00579800 | 2.68182300  | 1.81500200  |
| C | -1.12760900 | 1.98496800  | 3.02647400  |
| H | -0.75719700 | 0.96519400  | 3.08190700  |
| C | -1.70665000 | 2.58973600  | 4.14217000  |
| H | -1.79768300 | 2.03472600  | 5.07151400  |
| C | -2.15609700 | 3.90941300  | 4.06644300  |
| H | -2.59843900 | 4.38595700  | 4.93659500  |
| C | -2.02789000 | 4.61793000  | 2.86979300  |
| H | -2.37151500 | 5.64667400  | 2.80691600  |
| C | -1.46292100 | 4.00699900  | 1.74964600  |
| H | -1.37054000 | 4.56581100  | 0.82465200  |
| C | 0.43795100  | 3.01996400  | -0.70158100 |
| C | 0.43360400  | 2.84931500  | -2.09614100 |
| H | -0.11565200 | 2.02626100  | -2.54168800 |
| C | 1.14914000  | 3.71452000  | -2.92418800 |
| H | 1.12983200  | 3.56500600  | -4.00003600 |
| C | 1.88893900  | 4.76411400  | -2.37541900 |
| H | 2.44479600  | 5.43847700  | -3.02021700 |
| C | 1.90951500  | 4.93737500  | -0.98896800 |
| H | 2.48511900  | 5.74761100  | -0.54996100 |
| C | 1.19509400  | 4.07279900  | -0.16051900 |
| H | 1.23081200  | 4.21098300  | 0.91543200  |
| C | -0.43975700 | -3.55223000 | -0.50682300 |
| C | -1.61666900 | -4.42683800 | -0.96368300 |

|   |             |             |             |
|---|-------------|-------------|-------------|
| H | -2.52645400 | -4.22806600 | -0.39265100 |
| H | -1.36295900 | -5.48616900 | -0.83577300 |
| H | -1.83968800 | -4.26037400 | -2.02158700 |
| C | -0.10221500 | -3.76887700 | 0.97567000  |
| H | 0.70617200  | -3.10565500 | 1.29762000  |
| H | 0.23626300  | -4.80054000 | 1.12900100  |
| H | -0.95771500 | -3.59774800 | 1.63232100  |
| C | 0.80355300  | -3.86883900 | -1.36096200 |
| H | 0.61388000  | -3.68456300 | -2.42147200 |
| H | 1.07969600  | -4.92192900 | -1.23345000 |
| H | 1.65997100  | -3.25757600 | -1.05581400 |
| H | 0.34422100  | -1.10444500 | -0.19678000 |
| C | 4.70199500  | -1.83358500 | 1.07977900  |
| C | 3.42103700  | -1.48873700 | 1.56921200  |
| C | 2.91218200  | -2.10147600 | 2.71673600  |
| C | 3.70766600  | -3.05676900 | 3.34506500  |
| C | 4.98285300  | -3.39284200 | 2.84901800  |
| C | 5.50595400  | -2.78448000 | 1.70891400  |
| C | 3.76904800  | -0.27555200 | -0.20785600 |
| H | 1.93285000  | -1.82657800 | 3.09442100  |
| H | 3.34123100  | -3.55183200 | 4.23904400  |
| H | 5.57427400  | -4.14018600 | 3.36893300  |
| H | 6.49110700  | -3.04046700 | 1.33334300  |
| H | 5.54057200  | 1.66773900  | -1.25286600 |
| N | 4.88759600  | -1.05071600 | -0.05182300 |
| N | 2.86621300  | -0.51830900 | 0.73737400  |
| C | 6.09278600  | -0.96273400 | -0.87335500 |
| H | 6.86170900  | -0.41909000 | -0.31040700 |
| H | 6.46268100  | -1.97684900 | -1.05095300 |
| C | 5.78615400  | -0.24907400 | -2.19057200 |
| H | 6.73390000  | -0.03353600 | -2.69461600 |
| H | 5.21453000  | -0.91744800 | -2.84744800 |
| C | 4.78996900  | 1.83357900  | -3.25877200 |
| H | 4.19363200  | 2.73367000  | -3.07918000 |
| H | 5.75117700  | 2.13961700  | -3.68532200 |
| H | 4.26419400  | 1.23122900  | -4.00916600 |
| C | 4.98415600  | 1.04271600  | -1.96598500 |
| C | 3.62606300  | 0.69042500  | -1.33459400 |
| H | 3.10063600  | 1.57574700  | -0.96419000 |
| H | 2.96884300  | 0.24810800  | -2.09603000 |

**TS7'**

|    |             |             |            |
|----|-------------|-------------|------------|
| Fe | -4.30988600 | -1.02104000 | 0.05327100 |
| P  | -2.85235400 | 2.05423000  | 0.02769800 |

|   |             |             |             |
|---|-------------|-------------|-------------|
| P | 0.45916200  | -0.57647700 | 0.50635400  |
| O | -4.10973700 | 2.60742100  | 0.65487700  |
| C | -2.90799800 | 0.35419200  | -0.56799100 |
| C | -2.25393200 | -0.80361800 | 0.00686400  |
| C | -2.64024300 | -1.93499400 | -0.77740300 |
| H | -2.33243200 | -2.95415300 | -0.60346800 |
| C | -3.52224500 | -1.50554800 | -1.80620000 |
| H | -4.01231100 | -2.14406600 | -2.52769600 |
| C | -3.69936300 | -0.10146400 | -1.67819000 |
| H | -4.35731000 | 0.51155700  | -2.27500300 |
| C | -1.29762800 | -0.85619400 | 1.17106900  |
| H | -1.48441100 | -0.00379600 | 1.83106100  |
| C | -1.44450400 | -2.15578200 | 1.97173700  |
| H | -1.22482200 | -3.03112000 | 1.35781800  |
| H | -2.47288700 | -2.24846200 | 2.32681300  |
| H | -0.77648700 | -2.17901300 | 2.83314800  |
| C | -6.35094000 | -0.70225500 | 0.19794300  |
| H | -6.93444100 | -0.21760100 | -0.57250500 |
| C | -5.67907700 | -0.04675300 | 1.27069100  |
| H | -5.61145100 | 1.02173100  | 1.41714500  |
| C | -4.97158100 | -1.03827200 | 2.01445500  |
| H | -4.34085700 | -0.85159700 | 2.87251300  |
| C | -5.20994000 | -2.30799900 | 1.40376300  |
| H | -4.79141700 | -3.25532300 | 1.71442300  |
| C | -6.06225900 | -2.09928300 | 0.27792000  |
| H | -6.39534000 | -2.85947600 | -0.41520300 |
| C | 0.56344700  | -1.80289200 | -0.84227100 |
| C | 0.45701600  | -1.33332300 | -2.15726300 |
| H | 0.42656700  | -0.26560900 | -2.33969400 |
| C | 0.41044500  | -2.22999600 | -3.22364400 |
| H | 0.32859900  | -1.85443100 | -4.23896700 |
| C | 0.48950800  | -3.60282000 | -2.98681600 |
| H | 0.46121900  | -4.30087900 | -3.81842300 |
| C | 0.62213900  | -4.07881800 | -1.68022100 |
| H | 0.70052500  | -5.14579000 | -1.49319900 |
| C | 0.65652700  | -3.18377900 | -0.61147300 |
| H | 0.76895500  | -3.56039100 | 0.39945500  |
| C | 1.59974400  | -1.18566100 | 1.80460300  |
| C | 1.39889000  | -0.82888200 | 3.14846000  |
| H | 0.49801100  | -0.29924000 | 3.44291300  |
| C | 2.35602200  | -1.13799400 | 4.11443200  |
| H | 2.18301500  | -0.86269100 | 5.15062000  |
| C | 3.53508600  | -1.79172400 | 3.74854300  |
| H | 4.28320000  | -2.02640700 | 4.49972500  |

|    |             |             |             |
|----|-------------|-------------|-------------|
| C  | 3.74959100  | -2.13548600 | 2.41295800  |
| H  | 4.66979500  | -2.62821700 | 2.11441300  |
| C  | 2.79016500  | -1.83563900 | 1.44567300  |
| H  | 2.97965100  | -2.08749200 | 0.40884400  |
| C  | -2.20546500 | 3.11672700  | -1.34785100 |
| C  | -3.26818400 | 3.26319800  | -2.44882000 |
| H  | -3.39912800 | 2.33642300  | -3.01271400 |
| H  | -2.95132400 | 4.03605900  | -3.15851000 |
| H  | -4.23511600 | 3.56172600  | -2.03302400 |
| C  | -0.91685000 | 2.51499800  | -1.92082900 |
| H  | -0.15194700 | 2.36416400  | -1.14444300 |
| H  | -0.48925000 | 3.18753800  | -2.67315800 |
| H  | -1.10073000 | 1.54830500  | -2.39680800 |
| C  | -1.93997200 | 4.49396800  | -0.71295400 |
| H  | -2.86746700 | 4.94322600  | -0.34827700 |
| H  | -1.49818700 | 5.16762300  | -1.45596700 |
| H  | -1.24813800 | 4.42326100  | 0.13197300  |
| H  | -1.74222300 | 2.00323000  | 0.89994300  |
| Ni | 1.34306000  | 1.38997500  | 0.09386600  |
| C  | 5.03164700  | 0.09773300  | -0.50252900 |
| C  | 4.54156700  | -0.28082500 | -1.78228000 |
| C  | 5.35527600  | -1.02528600 | -2.64455900 |
| C  | 6.63142500  | -1.37761300 | -2.20928800 |
| C  | 7.09958200  | -1.00128200 | -0.93571500 |
| C  | 6.30638900  | -0.25979900 | -0.05940800 |
| C  | 2.91333100  | 0.78779200  | -0.82112600 |
| H  | 4.98747800  | -1.31953600 | -3.62285000 |
| H  | 7.27908200  | -1.95669100 | -2.86123800 |
| H  | 8.09815000  | -1.29657100 | -0.62666700 |
| H  | 6.67097200  | 0.01993300  | 0.92441700  |
| N  | 3.99021100  | 0.79815300  | 0.08000600  |
| N  | 3.23905600  | 0.17485200  | -1.94781200 |
| C  | 3.96724100  | 1.40482200  | 1.40680600  |
| H  | 3.31939100  | 0.82154100  | 2.06645300  |
| H  | 4.97961900  | 1.34767000  | 1.81215400  |
| C  | 3.52677600  | 2.87837700  | 1.38447200  |
| H  | 3.67832500  | 3.28932800  | 2.39073600  |
| H  | 4.19852800  | 3.42240000  | 0.71135200  |
| C  | 1.88477100  | 4.50513800  | 0.28897700  |
| H  | 0.86654500  | 4.62810900  | -0.08206100 |
| H  | 2.07880400  | 5.30466500  | 1.01526100  |
| H  | 2.57339200  | 4.64425600  | -0.55046300 |
| C  | 2.07696400  | 3.15479500  | 0.96102300  |
| C  | 0.98852500  | 2.58790000  | 1.68107600  |

|   |            |            |             |
|---|------------|------------|-------------|
| H | 0.04383100 | 3.12428000 | 1.69627800  |
| H | 1.18763600 | 1.98228100 | 2.56254700  |
| H | 2.28727000 | 2.35635800 | -0.48591900 |

**14'**

|    |             |             |             |
|----|-------------|-------------|-------------|
| Fe | -4.08929400 | -0.05292300 | -0.57443400 |
| P  | -1.58665200 | 1.77651800  | 0.80900000  |
| P  | 0.38567300  | -1.48699200 | 0.20462500  |
| O  | -2.06508800 | 1.36942700  | 2.18356700  |
| C  | -2.20280000 | 0.74257700  | -0.53148800 |
| C  | -2.13723400 | -0.70417700 | -0.51829800 |
| C  | -2.75534900 | -1.16664000 | -1.71961800 |
| H  | -2.88622700 | -2.20061600 | -1.99998100 |
| C  | -3.21042300 | -0.04487400 | -2.46406700 |
| H  | -3.75866800 | -0.08059300 | -3.39490000 |
| C  | -2.87497300 | 1.13083600  | -1.74136800 |
| H  | -3.12439400 | 2.13639700  | -2.03813900 |
| C  | -1.48144900 | -1.58120500 | 0.51640900  |
| H  | -1.62247100 | -1.12505400 | 1.50053900  |
| C  | -2.04117000 | -3.00636500 | 0.50018300  |
| H  | -1.83346400 | -3.50863800 | -0.44727100 |
| H  | -3.12636300 | -2.97177800 | 0.63016600  |
| H  | -1.61924900 | -3.61690300 | 1.29877100  |
| C  | -5.78081100 | 1.04383500  | -0.09165600 |
| H  | -5.95485400 | 2.06236100  | -0.40936000 |
| C  | -5.09865800 | 0.64076000  | 1.09554300  |
| H  | -4.62807000 | 1.28588700  | 1.82284600  |
| C  | -5.04070400 | -0.78415700 | 1.10608600  |
| H  | -4.55270800 | -1.38686300 | 1.85879000  |
| C  | -5.68884200 | -1.26463900 | -0.07271000 |
| H  | -5.78172200 | -2.29907300 | -0.37345800 |
| C  | -6.14528000 | -0.13339800 | -0.81450600 |
| H  | -6.64210400 | -0.16206400 | -1.77445400 |
| C  | 0.50961200  | -1.94650100 | -1.56020300 |
| C  | 0.62558000  | -0.92177300 | -2.50893500 |
| H  | 0.77084500  | 0.10232300  | -2.18663800 |
| C  | 0.59561400  | -1.22440600 | -3.87068800 |
| H  | 0.69486900  | -0.42354200 | -4.59696600 |
| C  | 0.45318000  | -2.54582900 | -4.29492400 |
| H  | 0.43425500  | -2.77842900 | -5.35573000 |
| C  | 0.34866700  | -3.57275000 | -3.35343700 |
| H  | 0.25000100  | -4.60425200 | -3.67889700 |
| C  | 0.37568100  | -3.27637400 | -1.99145100 |
| H  | 0.30597900  | -4.07931700 | -1.26563300 |

|    |             |             |             |
|----|-------------|-------------|-------------|
| C  | 1.17635400  | -2.86583100 | 1.10930300  |
| C  | 0.72474900  | -3.25704000 | 2.37933000  |
| H  | -0.16015600 | -2.79996100 | 2.80951600  |
| C  | 1.41781600  | -4.22182300 | 3.10961900  |
| H  | 1.05131700  | -4.52044000 | 4.08722400  |
| C  | 2.57978100  | -4.79601400 | 2.59018000  |
| H  | 3.11916200  | -5.54595100 | 3.16077300  |
| C  | 3.04778200  | -4.39709100 | 1.33730900  |
| H  | 3.95498000  | -4.83247400 | 0.92911100  |
| C  | 2.35326500  | -3.43692000 | 0.60062100  |
| H  | 2.72615700  | -3.13098400 | -0.37134900 |
| C  | -1.79125600 | 3.57406600  | 0.40525100  |
| C  | -3.27925300 | 3.95131300  | 0.34713500  |
| H  | -3.80872700 | 3.42680300  | -0.45091600 |
| H  | -3.37826300 | 5.02813100  | 0.16765300  |
| H  | -3.77982700 | 3.72156200  | 1.29240000  |
| C  | -1.05399400 | 3.91109500  | -0.90177900 |
| H  | -0.01995700 | 3.55011700  | -0.88915600 |
| H  | -1.02353400 | 4.99939500  | -1.02833000 |
| H  | -1.53955100 | 3.49054000  | -1.78393000 |
| C  | -1.11451000 | 4.32233800  | 1.57063700  |
| H  | -1.57429800 | 4.07295400  | 2.53026000  |
| H  | -1.21055200 | 5.40211500  | 1.41120700  |
| H  | -0.04587000 | 4.08972000  | 1.62761800  |
| H  | -0.17266000 | 1.65428200  | 0.63987900  |
| Ni | 1.24289300  | 0.36662200  | 0.84379000  |
| C  | 4.77620100  | 1.27405200  | -0.67698100 |
| C  | 4.05946800  | 1.73136100  | -1.81586200 |
| C  | 4.75472500  | 2.30484400  | -2.88646200 |
| C  | 6.14241000  | 2.40942400  | -2.79790800 |
| C  | 6.83749300  | 1.95162200  | -1.66313200 |
| C  | 6.16508900  | 1.37603400  | -0.58366800 |
| C  | 2.54934300  | 0.92756900  | -0.45776800 |
| H  | 4.21545800  | 2.65681400  | -3.76112200 |
| H  | 6.70038300  | 2.85216800  | -3.61819300 |
| H  | 7.91879500  | 2.04886000  | -1.62466500 |
| H  | 6.70786900  | 1.02742700  | 0.29030000  |
| N  | 3.80250800  | 0.76822400  | 0.16845300  |
| N  | 2.69822900  | 1.50512800  | -1.64313200 |
| C  | 4.00513500  | 0.12704900  | 1.46600100  |
| H  | 3.51519900  | -0.85296500 | 1.44672600  |
| H  | 5.07618900  | -0.05347500 | 1.58658800  |
| C  | 3.49825400  | 0.94640600  | 2.67233400  |
| H  | 3.75945100  | 0.40131300  | 3.58757500  |

|   |            |             |            |
|---|------------|-------------|------------|
| H | 4.04324100 | 1.89744200  | 2.69320600 |
| C | 1.60729900 | 2.40601200  | 3.61496900 |
| H | 0.53584400 | 2.61133100  | 3.56035500 |
| H | 1.84665700 | 2.13262700  | 4.64802000 |
| H | 2.15557300 | 3.32123700  | 3.36738900 |
| C | 1.98467800 | 1.24893800  | 2.67845700 |
| C | 1.04594300 | 0.07957600  | 2.74484400 |
| H | 0.07770400 | 0.29119200  | 3.19721600 |
| H | 1.47891200 | -0.86674700 | 3.06277900 |
| H | 1.83123200 | 1.76453600  | 1.63734900 |

**15'**

|    |             |             |             |
|----|-------------|-------------|-------------|
| Ni | 0.92700700  | 1.16147300  | -0.33653700 |
| Fe | -4.30997000 | -0.75128900 | 0.11393700  |
| P  | -1.98709900 | 1.73906200  | 0.08256900  |
| P  | 0.40388100  | -0.99260300 | 0.25760000  |
| O  | -1.89065400 | 1.76618700  | 1.58538000  |
| C  | -2.66109500 | 0.22562800  | -0.60076900 |
| C  | -2.29213700 | -1.07685000 | -0.08619800 |
| C  | -2.99913700 | -2.04915300 | -0.85196100 |
| H  | -2.96219700 | -3.11692700 | -0.69597500 |
| C  | -3.81054100 | -1.37736700 | -1.80959100 |
| H  | -4.49886400 | -1.84646700 | -2.49856000 |
| C  | -3.60899000 | 0.02160300  | -1.66379500 |
| H  | -4.11365400 | 0.78921500  | -2.22881900 |
| C  | -1.29596100 | -1.33787600 | 1.00536200  |
| H  | -1.41913100 | -0.55730900 | 1.76137700  |
| C  | -1.44193200 | -2.71723900 | 1.64607400  |
| H  | -1.29717000 | -3.51913700 | 0.91870300  |
| H  | -2.44447700 | -2.82480900 | 2.07172800  |
| H  | -0.71285900 | -2.85445500 | 2.44741200  |
| C  | -6.10096800 | 0.17842000  | 0.60116900  |
| H  | -6.57404400 | 0.95088300  | 0.01148900  |
| C  | -5.13872500 | 0.38257300  | 1.63560500  |
| H  | -4.73117800 | 1.32915700  | 1.95813200  |
| C  | -4.74209700 | -0.89586800 | 2.12773500  |
| H  | -3.99645900 | -1.07354000 | 2.88926400  |
| C  | -5.45921900 | -1.89229300 | 1.39843400  |
| H  | -5.35225600 | -2.96242500 | 1.50937000  |
| C  | -6.29829300 | -1.22825000 | 0.45360000  |
| H  | -6.93984800 | -1.70748300 | -0.27295700 |
| C  | 0.53026500  | -2.25267400 | -1.05377500 |
| C  | 0.30307500  | -1.83154900 | -2.37114800 |
| H  | 0.15642000  | -0.77546700 | -2.57344600 |

|   |             |             |             |
|---|-------------|-------------|-------------|
| C | 0.28304800  | -2.75712600 | -3.41290700 |
| H | 0.10909200  | -2.42033700 | -4.43036200 |
| C | 0.50535900  | -4.11001000 | -3.14945800 |
| H | 0.49867800  | -4.83043200 | -3.96219300 |
| C | 0.74841400  | -4.53544600 | -1.84188600 |
| H | 0.93209400  | -5.58571900 | -1.63518800 |
| C | 0.75826100  | -3.61217100 | -0.79629500 |
| H | 0.95565300  | -3.94698800 | 0.21614800  |
| C | 1.58214000  | -1.45959700 | 1.57467900  |
| C | 1.34633700  | -1.01466000 | 2.88563300  |
| H | 0.42152600  | -0.50110800 | 3.13155600  |
| C | 2.30531900  | -1.20964700 | 3.87879100  |
| H | 2.10953900  | -0.86485600 | 4.88992600  |
| C | 3.51618700  | -1.83463600 | 3.57164800  |
| H | 4.26679200  | -1.97628100 | 4.34358100  |
| C | 3.76170700  | -2.26570500 | 2.26751800  |
| H | 4.70935200  | -2.72985700 | 2.01289600  |
| C | 2.80072400  | -2.08230200 | 1.27347100  |
| H | 3.01552100  | -2.39050900 | 0.25756500  |
| C | -2.72609100 | 3.24176000  | -0.71078900 |
| C | -4.24374000 | 3.27190500  | -0.46675700 |
| H | -4.75682300 | 2.42046700  | -0.91716700 |
| H | -4.65786000 | 4.18805700  | -0.90241700 |
| H | -4.47130400 | 3.27972300  | 0.60290900  |
| C | -2.38801700 | 3.25873500  | -2.21032000 |
| H | -1.30706200 | 3.21468900  | -2.37697600 |
| H | -2.75197000 | 4.19422500  | -2.64920600 |
| H | -2.84804700 | 2.43395000  | -2.75865600 |
| C | -2.07050600 | 4.45228100  | -0.01840800 |
| H | -2.23072300 | 4.42985300  | 1.06218800  |
| H | -2.51361900 | 5.37200700  | -0.41612300 |
| H | -0.99412800 | 4.48996300  | -0.20517000 |
| H | -0.69862700 | 1.78626000  | -0.57807600 |
| C | 4.83120000  | 0.32176700  | -0.01204200 |
| C | 4.50633000  | -0.37378500 | -1.20878700 |
| C | 5.47984500  | -1.15239800 | -1.84329000 |
| C | 6.75259200  | -1.21119100 | -1.27433100 |
| C | 7.05912300  | -0.51201700 | -0.09180600 |
| C | 6.10118300  | 0.26632500  | 0.56127200  |
| C | 2.68510500  | 0.62273800  | -0.57535800 |
| H | 5.23994400  | -1.69461200 | -2.75314800 |
| H | 7.52450700  | -1.80854200 | -1.75129800 |
| H | 8.06120400  | -0.57914600 | 0.32216600  |
| H | 6.33854400  | 0.80023200  | 1.47651000  |



|   |            |             |             |
|---|------------|-------------|-------------|
| N | 3.65047600 | 0.93525500  | 0.36759100  |
| N | 3.16681700 | -0.16284400 | -1.52734200 |
| C | 3.43080500 | 1.88762700  | 1.43978700  |
| H | 2.43041500 | 1.69371000  | 1.83576400  |
| H | 4.14349000 | 1.68513200  | 2.24369900  |
| C | 3.53704100 | 3.33477800  | 0.93938000  |
| H | 3.06850500 | 3.98930700  | 1.68746100  |
| H | 4.59268600 | 3.62719300  | 0.88029700  |
| C | 2.91664200 | 5.06749300  | -0.77011600 |
| H | 2.53903400 | 5.25301900  | -1.78174300 |
| H | 2.29221200 | 5.63865000  | -0.07141900 |
| H | 3.93527200 | 5.47163100  | -0.71425100 |
| C | 2.88313400 | 3.56786900  | -0.43673700 |
| C | 1.45770400 | 3.01783100  | -0.52956200 |
| H | 1.01929800 | 3.31143500  | -1.49487200 |
| H | 0.84374500 | 3.46450500  | 0.27217200  |
| H | 3.49969300 | 3.05503600  | -1.18538500 |

**TS8'**

|    |             |             |             |
|----|-------------|-------------|-------------|
| Ni | 1.25278500  | 0.12516700  | -1.31533500 |
| Fe | -3.83222600 | -0.10910700 | 0.90187000  |
| P  | -1.80032500 | -0.56536700 | -1.80367300 |
| P  | 0.55813000  | 1.52594000  | 0.21480400  |
| O  | -2.34488700 | 0.70134300  | -2.42824000 |
| C  | -2.09499000 | -0.67195900 | -0.02965400 |
| C  | -1.85381100 | 0.43940800  | 0.86827600  |
| C  | -2.19879300 | 0.00647700  | 2.18347600  |
| H  | -2.15931300 | 0.61588700  | 3.07393000  |
| C  | -2.66613900 | -1.33602400 | 2.11438500  |
| H  | -3.04568200 | -1.91969600 | 2.94140200  |
| C  | -2.60246300 | -1.75904500 | 0.75885000  |
| H  | -2.92408500 | -2.71920700 | 0.39008000  |
| C  | -1.29098800 | 1.78071800  | 0.49225600  |
| H  | -1.68133300 | 2.03588300  | -0.49737400 |
| C  | -1.61580600 | 2.88473100  | 1.49799500  |
| H  | -1.18319000 | 2.67441300  | 2.47934000  |
| H  | -2.69914500 | 2.97503700  | 1.61884400  |
| H  | -1.22648800 | 3.84859400  | 1.16200200  |
| C  | -5.70266600 | -0.61174100 | 0.16218700  |
| H  | -5.95625900 | -1.58004100 | -0.24555700 |
| C  | -5.16045200 | 0.48993200  | -0.56645400 |
| H  | -4.88572200 | 0.50232500  | -1.61083800 |
| C  | -4.92800500 | 1.55367600  | 0.35468000  |
| H  | -4.48605000 | 2.50959900  | 0.11248300  |

|   |             |             |             |
|---|-------------|-------------|-------------|
| C | -5.32450300 | 1.11153900  | 1.65374900  |
| H | -5.23915100 | 1.67538900  | 2.57231200  |
| C | -5.80258100 | -0.22842200 | 1.53475600  |
| H | -6.14160500 | -0.85610700 | 2.34738600  |
| C | 1.16080000  | 1.15860500  | 1.90509000  |
| C | 1.22797000  | -0.19295400 | 2.27798000  |
| H | 0.96015700  | -0.96044200 | 1.56234500  |
| C | 1.63437800  | -0.55324900 | 3.56239800  |
| H | 1.69396900  | -1.60392100 | 3.82789600  |
| C | 1.97624800  | 0.43289100  | 4.48917800  |
| H | 2.30208500  | 0.15344000  | 5.48690000  |
| C | 1.89771500  | 1.78109300  | 4.13190000  |
| H | 2.15467800  | 2.55194800  | 4.85273600  |
| C | 1.48755600  | 2.14460800  | 2.84887700  |
| H | 1.42822700  | 3.19402800  | 2.58178700  |
| C | 1.20455900  | 3.18733800  | -0.21285100 |
| C | 0.45344500  | 4.04402100  | -1.03374400 |
| H | -0.55438600 | 3.77196100  | -1.33102100 |
| C | 0.99531200  | 5.24668800  | -1.48710200 |
| H | 0.39780100  | 5.89982600  | -2.11621800 |
| C | 2.29708400  | 5.60892200  | -1.13687000 |
| H | 2.71703100  | 6.54582400  | -1.49006800 |
| C | 3.05767900  | 4.75651400  | -0.33432800 |
| H | 4.07343400  | 5.02704400  | -0.06075600 |
| C | 2.51901300  | 3.55330600  | 0.12031800  |
| H | 3.12223800  | 2.89782100  | 0.73977800  |
| C | -2.27762000 | -2.13026400 | -2.67624700 |
| C | -3.79729000 | -2.34036400 | -2.61733300 |
| H | -4.14576300 | -2.49268300 | -1.59316400 |
| H | -4.06804900 | -3.22769000 | -3.20159200 |
| H | -4.33414900 | -1.48512100 | -3.03825200 |
| C | -1.51419400 | -3.33465300 | -2.10075300 |
| H | -0.44930300 | -3.12711300 | -1.95803700 |
| H | -1.61228300 | -4.18181700 | -2.79006000 |
| H | -1.90870100 | -3.65278800 | -1.13392900 |
| C | -1.83735800 | -1.89773300 | -4.13593300 |
| H | -2.32544500 | -1.02006300 | -4.56735200 |
| H | -2.09972300 | -2.77432200 | -4.73875700 |
| H | -0.75280400 | -1.75652300 | -4.20657500 |
| H | -0.36736100 | -0.66089700 | -1.88229100 |
| C | 3.40516800  | -2.37876400 | 0.84439900  |
| C | 2.24921700  | -3.14221700 | 0.52640600  |
| C | 2.01271400  | -4.34817400 | 1.19670000  |
| C | 2.93127200  | -4.75793100 | 2.16366100  |

|   |            |             |             |
|---|------------|-------------|-------------|
| C | 4.06938800 | -3.98817400 | 2.46724300  |
| C | 4.32391400 | -2.78029300 | 1.81267000  |
| C | 2.14012700 | -1.34354000 | -0.68054300 |
| H | 1.13082200 | -4.93830800 | 0.96637400  |
| H | 2.76481300 | -5.68924800 | 2.69745900  |
| H | 4.76050600 | -4.33549200 | 3.22962100  |
| H | 5.19279400 | -2.17855900 | 2.06047500  |
| N | 3.32337700 | -1.25505400 | 0.04011500  |
| N | 1.50480800 | -2.49139300 | -0.44489400 |
| C | 4.29872900 | -0.17869300 | -0.03519500 |
| H | 4.11483400 | 0.55021300  | 0.76411100  |
| H | 5.27729000 | -0.63163700 | 0.15389300  |
| C | 4.31091300 | 0.50856800  | -1.41131400 |
| H | 3.59737400 | 1.34062100  | -1.42653900 |
| H | 5.30709300 | 0.94179100  | -1.55696300 |
| C | 4.43656900 | 0.11159600  | -3.91085500 |
| H | 4.14451400 | -0.54534200 | -4.73718100 |
| H | 3.99207000 | 1.09745500  | -4.09421600 |
| H | 5.52657200 | 0.22370700  | -3.93784300 |
| C | 3.96846900 | -0.45173900 | -2.56388800 |
| C | 2.46014600 | -0.73422600 | -2.58841300 |
| H | 2.20326300 | -1.68245400 | -3.06177400 |
| H | 1.94219400 | 0.08227900  | -3.15848900 |
| H | 4.49249400 | -1.40055600 | -2.38884500 |

**16'**

|    |             |             |             |
|----|-------------|-------------|-------------|
| Ni | 1.13958800  | 0.83672900  | 0.36779300  |
| Fe | -3.77647900 | -1.72139200 | -0.02657300 |
| P  | -0.37766500 | -1.95870000 | -0.40487500 |
| P  | -0.60713300 | 1.86669700  | -0.09086000 |
| O  | -0.62299100 | -2.40661200 | -1.83261100 |
| C  | -1.82558100 | -1.36786200 | 0.50442800  |
| C  | -2.48344300 | -0.12232100 | 0.17697800  |
| C  | -3.57995300 | 0.03244100  | 1.07712600  |
| H  | -4.28180100 | 0.85315000  | 1.07729600  |
| C  | -3.61979900 | -1.09398600 | 1.94694600  |
| H  | -4.36436800 | -1.28329400 | 2.70791500  |
| C  | -2.54458900 | -1.95880400 | 1.60021200  |
| H  | -2.33525300 | -2.91108400 | 2.06148700  |
| C  | -2.03899900 | 0.86733000  | -0.85996100 |
| H  | -1.56289900 | 0.31537400  | -1.67756900 |
| C  | -3.18766000 | 1.70507100  | -1.42224300 |
| H  | -3.68011200 | 2.28684300  | -0.63990500 |
| H  | -3.93968600 | 1.05382500  | -1.87730900 |

|   |             |             |             |
|---|-------------|-------------|-------------|
| H | -2.83275800 | 2.40264100  | -2.18385900 |
| C | -4.49543900 | -3.59287400 | -0.54394800 |
| H | -4.25930000 | -4.50043100 | -0.00530900 |
| C | -3.74249000 | -3.03912600 | -1.62235600 |
| H | -2.80566200 | -3.40816300 | -2.01379600 |
| C | -4.36242100 | -1.81232000 | -2.00475300 |
| H | -4.00225200 | -1.13813700 | -2.76868200 |
| C | -5.50033300 | -1.60717300 | -1.16538200 |
| H | -6.15789900 | -0.74888800 | -1.18116000 |
| C | -5.58167700 | -2.70836200 | -0.25988100 |
| H | -6.31320700 | -2.83079500 | 0.52716600  |
| C | -1.50482000 | 2.79862000  | 1.21933000  |
| C | -1.39033500 | 2.30630700  | 2.52814600  |
| H | -0.73349900 | 1.46020800  | 2.71102700  |
| C | -2.10718400 | 2.88702100  | 3.57427900  |
| H | -2.01153900 | 2.49044000  | 4.58104100  |
| C | -2.93974500 | 3.98021400  | 3.32742600  |
| H | -3.49360100 | 4.43909900  | 4.14141000  |
| C | -3.05247300 | 4.48730800  | 2.03106700  |
| H | -3.69457200 | 5.34134400  | 1.83456000  |
| C | -2.34410900 | 3.89836500  | 0.98273400  |
| H | -2.43833100 | 4.30276500  | -0.01932700 |
| C | -0.24732300 | 3.11743500  | -1.39527900 |
| C | -0.18444300 | 2.72027200  | -2.74164100 |
| H | -0.44366700 | 1.70333100  | -3.02060000 |
| C | 0.21885700  | 3.61488900  | -3.73231700 |
| H | 0.25413900  | 3.28913100  | -4.76818800 |
| C | 0.57651500  | 4.92206000  | -3.39577800 |
| H | 0.89073200  | 5.61926600  | -4.16687900 |
| C | 0.53118100  | 5.32399400  | -2.05947900 |
| H | 0.81293700  | 6.33696800  | -1.78571900 |
| C | 0.12679400  | 4.42996100  | -1.06799600 |
| H | 0.10535000  | 4.75345800  | -0.03237700 |
| C | 0.51953600  | -3.21487900 | 0.62628500  |
| C | -0.26103200 | -4.53799100 | 0.64301100  |
| H | -1.22836600 | -4.44417100 | 1.14293900  |
| H | 0.31633300  | -5.30448600 | 1.17379100  |
| H | -0.44440600 | -4.89399600 | -0.37506500 |
| C | 0.77204400  | -2.66994500 | 2.04026300  |
| H | 1.23094800  | -1.67614500 | 2.00624300  |
| H | 1.45904400  | -3.33734900 | 2.57476800  |
| H | -0.14613900 | -2.59428500 | 2.62618800  |
| C | 1.87021600  | -3.42985800 | -0.08520500 |
| H | 1.72803300  | -3.73644600 | -1.12523700 |

|   |            |             |             |
|---|------------|-------------|-------------|
| H | 2.43837900 | -4.21220600 | 0.43136600  |
| H | 2.46915600 | -2.51554400 | -0.06924500 |
| H | 0.48231300 | -0.79362900 | -0.29215500 |
| C | 4.98739700 | -0.42122100 | 1.32669600  |
| C | 3.72839600 | 0.10725400  | 1.69202100  |
| C | 3.44812600 | 0.41756900  | 3.02461300  |
| C | 4.44910200 | 0.18489700  | 3.96433700  |
| C | 5.69989800 | -0.34599000 | 3.59054100  |
| C | 5.99275700 | -0.66004200 | 2.26445800  |
| C | 3.67576900 | -0.22490400 | -0.46173700 |
| H | 2.48023000 | 0.82556200  | 3.29676200  |
| H | 4.26450700 | 0.41610600  | 5.00887600  |
| H | 6.45360700 | -0.51493300 | 4.35343200  |
| H | 6.95551400 | -1.07151600 | 1.97985900  |
| N | 4.92399700 | -0.61055200 | -0.04732900 |
| N | 2.93308500 | 0.20881900  | 0.55187700  |
| C | 5.93807700 | -1.23492000 | -0.89480700 |
| H | 6.91250800 | -0.80939700 | -0.63745200 |
| H | 5.96887500 | -2.30756800 | -0.66686900 |
| C | 5.61102900 | -1.00982800 | -2.37120600 |
| H | 5.83581600 | 0.02899100  | -2.64488000 |
| H | 6.26563900 | -1.65092200 | -2.97030500 |
| C | 3.83038300 | -1.22321700 | -4.17332200 |
| H | 2.77046200 | -1.41704800 | -4.36782000 |
| H | 4.06752500 | -0.22766300 | -4.56678600 |
| H | 4.41655200 | -1.95655200 | -4.73699200 |
| C | 4.13448300 | -1.30359000 | -2.67855800 |
| C | 3.25211900 | -0.32286300 | -1.88774500 |
| H | 2.19690300 | -0.60988500 | -1.91737600 |
| H | 3.30802100 | 0.67611200  | -2.34250300 |
| H | 3.90911800 | -2.32080900 | -2.32879800 |

### TS7s

|    |             |             |             |
|----|-------------|-------------|-------------|
| Fe | -4.28612400 | -0.40377700 | 0.42463300  |
| P  | -1.87125000 | -1.88764500 | -1.48088700 |
| P  | 0.14538800  | 1.42762300  | 0.06990600  |
| O  | -2.94303800 | -2.31289000 | -2.45643900 |
| C  | -2.40797200 | -1.16788000 | 0.08255100  |
| C  | -2.31975200 | 0.22116000  | 0.48255700  |
| C  | -2.89232500 | 0.31926300  | 1.78877300  |
| H  | -2.98754300 | 1.22632400  | 2.36515300  |
| C  | -3.34609700 | -0.96631500 | 2.19187800  |
| H  | -3.86491000 | -1.19513400 | 3.11224500  |
| C  | -3.06011100 | -1.88400500 | 1.14511000  |

|   |             |             |             |
|---|-------------|-------------|-------------|
| H | -3.33156000 | -2.92853400 | 1.12721500  |
| C | -1.71878600 | 1.37304800  | -0.28121400 |
| H | -1.78658200 | 1.16511500  | -1.35321200 |
| C | -2.43697700 | 2.69385900  | 0.02266300  |
| H | -2.34864300 | 2.96642200  | 1.07593500  |
| H | -3.49998600 | 2.58871900  | -0.20474900 |
| H | -2.03559900 | 3.51786800  | -0.56750000 |
| C | -6.06059500 | -1.32364600 | -0.11556700 |
| H | -6.26297700 | -2.37281100 | 0.04974900  |
| C | -5.42896100 | -0.76758800 | -1.26675100 |
| H | -5.01144900 | -1.32748400 | -2.09145800 |
| C | -5.29336700 | 0.63727300  | -1.05524600 |
| H | -4.82275000 | 1.33489000  | -1.73403400 |
| C | -5.84243700 | 0.94999600  | 0.22644300  |
| H | -5.86301300 | 1.92572700  | 0.69189500  |
| C | -6.31648400 | -0.26431000 | 0.80810900  |
| H | -6.75552400 | -0.36804400 | 1.79088100  |
| C | 0.19868100  | 1.41389700  | 1.89556600  |
| C | 0.55091400  | 0.21561000  | 2.52974300  |
| H | 0.87153100  | -0.62901100 | 1.93299000  |
| C | 0.50559100  | 0.11272500  | 3.91937100  |
| H | 0.78209600  | -0.82132800 | 4.39885800  |
| C | 0.12260700  | 1.21160300  | 4.68917800  |
| H | 0.09339400  | 1.13385600  | 5.77208000  |
| C | -0.20838700 | 2.41746700  | 4.06662100  |
| H | -0.49185300 | 3.27959900  | 4.66332300  |
| C | -0.17245500 | 2.51948900  | 2.67626800  |
| H | -0.41861800 | 3.46281600  | 2.20108300  |
| C | 0.71139200  | 3.10047800  | -0.43639900 |
| C | 0.29085800  | 3.64870500  | -1.66007500 |
| H | -0.45721400 | 3.13674000  | -2.25711500 |
| C | 0.83765300  | 4.84284300  | -2.12657400 |
| H | 0.49571500  | 5.25892700  | -3.06973200 |
| C | 1.82509900  | 5.49843100  | -1.38658100 |
| H | 2.25269800  | 6.42738100  | -1.75161200 |
| C | 2.26378100  | 4.94996900  | -0.18071100 |
| H | 3.03935700  | 5.44684600  | 0.39452700  |
| C | 1.71571500  | 3.75720500  | 0.29258100  |
| H | 2.07851800  | 3.32629400  | 1.21936300  |
| C | -0.66664300 | -3.24053600 | -1.07761700 |
| C | 0.34260500  | -2.74023500 | -0.03513400 |
| H | 0.81639400  | -1.80023900 | -0.33681500 |
| H | 1.13560900  | -3.48271400 | 0.11081100  |
| H | -0.13912700 | -2.57068000 | 0.93126600  |

|    |             |             |             |
|----|-------------|-------------|-------------|
| C  | 0.02760600  | -3.59609900 | -2.40536900 |
| H  | -0.69533000 | -3.95714000 | -3.14207200 |
| H  | 0.76980100  | -4.38482400 | -2.23759400 |
| H  | 0.54479000  | -2.73533500 | -2.84030600 |
| C  | -1.41932600 | -4.47651100 | -0.56050100 |
| H  | -1.83882100 | -4.31058600 | 0.43474100  |
| H  | -0.72439200 | -5.32088700 | -0.48465000 |
| H  | -2.22921600 | -4.76188700 | -1.23804100 |
| H  | -1.01300900 | -0.87386300 | -1.96503400 |
| Ni | 1.77687000  | 0.55706100  | -1.07838900 |
| C  | 4.43169000  | -1.88635800 | 0.59283100  |
| C  | 4.37154800  | -0.95642000 | 1.66646800  |
| C  | 5.04507600  | -1.23227300 | 2.86271900  |
| C  | 5.75807600  | -2.42517300 | 2.95907500  |
| C  | 5.80619300  | -3.33753200 | 1.88707600  |
| C  | 5.14122100  | -3.08535100 | 0.68730200  |
| C  | 3.14829700  | -0.10585000 | 0.08647800  |
| H  | 5.00216000  | -0.52721300 | 3.68728700  |
| H  | 6.28790200  | -2.66040900 | 3.87764100  |
| H  | 6.37027500  | -4.25910000 | 1.99744200  |
| H  | 5.17859000  | -3.79683600 | -0.13215700 |
| H  | 3.20694500  | 0.71012200  | -1.36999400 |
| N  | 3.67081700  | -1.31417700 | -0.41231800 |
| N  | 3.58717200  | 0.13312500  | 1.31205400  |
| C  | 3.41930000  | -1.85860600 | -1.74430300 |
| H  | 4.08137100  | -2.71680700 | -1.87959400 |
| H  | 2.39399300  | -2.23093100 | -1.80140000 |
| C  | 3.68102700  | -0.85393900 | -2.88281600 |
| H  | 4.73551200  | -0.56050900 | -2.83513800 |
| H  | 3.53667000  | -1.38222500 | -3.83314300 |
| C  | 3.53993200  | 1.66508100  | -3.38891400 |
| H  | 2.91450500  | 2.55323900  | -3.27004700 |
| H  | 4.48565200  | 1.84108500  | -2.86620700 |
| H  | 3.76483800  | 1.54266900  | -4.45589000 |
| C  | 2.82299700  | 0.42170300  | -2.87463500 |
| C  | 1.40396300  | 0.37554900  | -3.03761400 |
| H  | 0.91456500  | 1.22205900  | -3.51147600 |
| H  | 0.91152400  | -0.58121400 | -3.19302700 |

**TS7s'**

|    |             |             |             |
|----|-------------|-------------|-------------|
| Fe | -3.81964000 | 0.28107400  | -0.54984100 |
| P  | -1.60358200 | -1.86103600 | 0.85317900  |
| P  | 0.80869300  | 1.61377100  | -0.13049100 |
| O  | -2.52476300 | -2.99067100 | 0.46018400  |

|   |             |             |             |
|---|-------------|-------------|-------------|
| C | -2.29586900 | -0.19689400 | 0.74816700  |
| C | -1.89937900 | 0.91244300  | -0.09666600 |
| C | -2.83177200 | 1.97097600  | 0.14251100  |
| H | -2.83068500 | 2.93049200  | -0.35032800 |
| C | -3.79112000 | 1.54015500  | 1.09981700  |
| H | -4.64457100 | 2.10821800  | 1.44284200  |
| C | -3.47244000 | 0.20610100  | 1.47058500  |
| H | -4.04596400 | -0.42325600 | 2.13454300  |
| C | -0.73561200 | 1.00303500  | -1.04989300 |
| H | -0.44153500 | -0.00032500 | -1.37403900 |
| C | -1.06880300 | 1.84229800  | -2.29078100 |
| H | -1.30183600 | 2.87932900  | -2.03819400 |
| H | -1.94302800 | 1.41834400  | -2.78743600 |
| H | -0.24093000 | 1.84955900  | -2.99959900 |
| C | -5.49568000 | -0.88189900 | -0.89078200 |
| H | -6.06505000 | -1.34929000 | -0.09943100 |
| C | -4.36851900 | -1.45123400 | -1.55281500 |
| H | -3.90328400 | -2.39399100 | -1.30264500 |
| C | -3.86822200 | -0.48504000 | -2.47512500 |
| H | -2.99611400 | -0.60772300 | -3.10188300 |
| C | -4.68834600 | 0.68213200  | -2.38681400 |
| H | -4.54736300 | 1.60456800  | -2.93305200 |
| C | -5.69646000 | 0.43565900  | -1.40605300 |
| H | -6.45069800 | 1.13906400  | -1.08069800 |
| C | 0.23552300  | 3.00284800  | 0.91137500  |
| C | 0.32679700  | 2.86108400  | 2.30195200  |
| H | 0.77394200  | 1.96304700  | 2.71382500  |
| C | -0.14608100 | 3.86433700  | 3.14949100  |
| H | -0.07474000 | 3.74000800  | 4.22591800  |
| C | -0.70243500 | 5.02560300  | 2.61320700  |
| H | -1.06795600 | 5.80848500  | 3.27108400  |
| C | -0.77881300 | 5.18579900  | 1.22708200  |
| H | -1.19911000 | 6.09445200  | 0.80612200  |
| C | -0.31497300 | 4.18072300  | 0.38058700  |
| H | -0.36447800 | 4.31890000  | -0.69403400 |
| C | 1.89300200  | 2.37347900  | -1.40821600 |
| C | 2.26232800  | 1.58654000  | -2.51664200 |
| H | 1.84576400  | 0.59007200  | -2.63609600 |
| C | 3.18096400  | 2.07086900  | -3.44548900 |
| H | 3.45137800  | 1.45657500  | -4.29936200 |
| C | 3.75891600  | 3.33180200  | -3.27571200 |
| H | 4.47742400  | 3.70479900  | -3.99959800 |
| C | 3.41312200  | 4.10672100  | -2.16825800 |
| H | 3.86306900  | 5.08502100  | -2.02517200 |



|    |             |             |             |
|----|-------------|-------------|-------------|
| C  | 2.48661400  | 3.63219400  | -1.23770800 |
| H  | 2.23249600  | 4.24139200  | -0.37766100 |
| C  | -0.93486100 | -2.05398200 | 2.57410300  |
| C  | -2.08788500 | -2.11433200 | 3.58715600  |
| H  | -2.58559700 | -1.14699900 | 3.69271100  |
| H  | -1.69434300 | -2.39114600 | 4.57250600  |
| H  | -2.83212000 | -2.86233000 | 3.29856700  |
| C  | -0.00487900 | -0.87743600 | 2.89141800  |
| H  | 0.77027700  | -0.74968000 | 2.12908500  |
| H  | 0.48958800  | -1.03685900 | 3.85767100  |
| H  | -0.56349800 | 0.06063000  | 2.95076200  |
| C  | -0.17466500 | -3.39133900 | 2.58643100  |
| H  | -0.85307100 | -4.22718400 | 2.39703600  |
| H  | 0.29785700  | -3.54323100 | 3.56422300  |
| H  | 0.60174100  | -3.42189600 | 1.82000200  |
| H  | -0.42895500 | -1.74391800 | 0.08153900  |
| Ni | 2.42645200  | 0.25537600  | 0.38767400  |
| C  | 1.96595900  | -3.58496700 | -0.49559200 |
| C  | 1.34570700  | -3.06835100 | -1.66416300 |
| C  | 0.71172100  | -3.93945300 | -2.55775900 |
| C  | 0.71663600  | -5.30125700 | -2.26566800 |
| C  | 1.33743200  | -5.79849300 | -1.10396300 |
| C  | 1.96924000  | -4.94872300 | -0.19686900 |
| C  | 2.11695700  | -1.34021800 | -0.58920200 |
| H  | 0.22881000  | -3.55180700 | -3.44951400 |
| H  | 0.22737300  | -5.99557800 | -2.94221800 |
| H  | 1.31712400  | -6.86582500 | -0.90500100 |
| H  | 2.43461400  | -5.33703400 | 0.70375400  |
| N  | 2.46609600  | -2.47058900 | 0.16455200  |
| N  | 1.47073200  | -1.68262600 | -1.69593500 |
| C  | 3.16366400  | -2.44734200 | 1.45168900  |
| H  | 2.48873400  | -2.07645400 | 2.22860900  |
| H  | 3.40804400  | -3.48080600 | 1.70675000  |
| C  | 4.46271900  | -1.62138600 | 1.44955200  |
| H  | 4.94431200  | -1.76318200 | 2.42531700  |
| H  | 5.13365500  | -2.04935500 | 0.69642900  |
| C  | 5.51786500  | 0.50050300  | 0.45928600  |
| H  | 5.32176200  | 1.54326600  | 0.19710400  |
| H  | 6.39216700  | 0.47144300  | 1.12202500  |
| H  | 5.77665000  | -0.03882400 | -0.45740100 |
| C  | 4.32021700  | -0.11754700 | 1.16914400  |
| C  | 3.53382600  | 0.74239700  | 1.98784700  |
| H  | 3.82302600  | 1.78629800  | 2.07380500  |
| H  | 2.99548700  | 0.33814400  | 2.84365900  |

|   |            |             |             |
|---|------------|-------------|-------------|
| H | 3.53887100 | -0.45386900 | -0.22701800 |
|---|------------|-------------|-------------|

**TS9**

|    |             |             |             |
|----|-------------|-------------|-------------|
| Ni | 0.45224200  | 0.52050600  | 1.23343300  |
| Fe | -4.01376800 | -1.52627000 | -0.61103500 |
| P  | -0.65680700 | -1.60310200 | 0.46757700  |
| P  | -0.68689900 | 1.77833400  | -0.14517900 |
| O  | -0.06012500 | -1.61622000 | -0.92805900 |
| C  | -2.36498900 | -1.01410800 | 0.54463900  |
| C  | -2.82585300 | 0.11996800  | -0.22997600 |
| C  | -4.16838900 | 0.39337200  | 0.16594900  |
| H  | -4.80271000 | 1.16149600  | -0.25199500 |
| C  | -4.55825100 | -0.56430900 | 1.14674100  |
| H  | -5.53636900 | -0.64967700 | 1.59966900  |
| C  | -3.45711600 | -1.43353600 | 1.38079400  |
| H  | -3.46277000 | -2.27877100 | 2.05050200  |
| C  | -1.98332200 | 0.89422000  | -1.19738500 |
| H  | -1.37649000 | 0.17300900  | -1.75018200 |
| C  | -2.76992200 | 1.76508100  | -2.17218100 |
| H  | -3.38988200 | 2.50353800  | -1.65809300 |
| H  | -3.42953700 | 1.14129400  | -2.78447800 |
| H  | -2.09261400 | 2.29922800  | -2.84416800 |
| C  | -4.58713500 | -3.46647000 | -1.08851900 |
| H  | -4.55003000 | -4.30341600 | -0.40550900 |
| C  | -3.53563800 | -3.03936000 | -1.95481300 |
| H  | -2.55624400 | -3.48606000 | -2.04054400 |
| C  | -3.98231400 | -1.88056800 | -2.65484400 |
| H  | -3.39901500 | -1.30665100 | -3.36100400 |
| C  | -5.31206000 | -1.58978800 | -2.22327800 |
| H  | -5.91373800 | -0.74972900 | -2.54194300 |
| C  | -5.68589800 | -2.56992800 | -1.25526300 |
| H  | -6.62191200 | -2.60250400 | -0.71470400 |
| C  | -1.60494600 | 3.17989500  | 0.59895700  |
| C  | -1.90255700 | 3.08397000  | 1.96708000  |
| H  | -1.53191200 | 2.22924600  | 2.52614600  |
| C  | -2.65922800 | 4.06969300  | 2.60190900  |
| H  | -2.88398600 | 3.98045000  | 3.66077400  |
| C  | -3.11845800 | 5.17052500  | 1.87738700  |
| H  | -3.70201300 | 5.94242900  | 2.37066200  |
| C  | -2.82201500 | 5.28098800  | 0.51667800  |
| H  | -3.17495900 | 6.13820900  | -0.04937400 |
| C  | -2.07397400 | 4.29119500  | -0.12103400 |
| H  | -1.84863600 | 4.38821900  | -1.17738200 |
| C  | 0.46752100  | 2.47614600  | -1.38786600 |

|   |             |             |             |
|---|-------------|-------------|-------------|
| C | 1.02286300  | 1.58522000  | -2.32490900 |
| H | 0.70779900  | 0.54565000  | -2.33869800 |
| C | 2.00803400  | 2.01642300  | -3.21175400 |
| H | 2.42652400  | 1.31712000  | -3.92982000 |
| C | 2.46554400  | 3.33607100  | -3.16911700 |
| H | 3.23621400  | 3.66890700  | -3.85799000 |
| C | 1.93627300  | 4.21929000  | -2.22797100 |
| H | 2.29457600  | 5.24369600  | -2.17963700 |
| C | 0.94556300  | 3.79345100  | -1.34001000 |
| H | 0.55206600  | 4.48896500  | -0.60663000 |
| C | -0.50763800 | -3.26334400 | 1.32589900  |
| C | -1.45969500 | -4.29471500 | 0.70475500  |
| H | -2.50761800 | -4.02115400 | 0.83835400  |
| H | -1.29865700 | -5.26974800 | 1.17956000  |
| H | -1.26933800 | -4.41222400 | -0.36533100 |
| C | -0.75209200 | -3.11732700 | 2.83617800  |
| H | -0.08978400 | -2.36705900 | 3.28039900  |
| H | -0.54620700 | -4.07286200 | 3.33191800  |
| H | -1.78002100 | -2.83720600 | 3.07527700  |
| C | 0.94829300  | -3.70522000 | 1.08892000  |
| H | 1.16516100  | -3.79798700 | 0.02242500  |
| H | 1.11609800  | -4.67840800 | 1.56380800  |
| H | 1.66094000  | -2.99721100 | 1.52397400  |
| H | 0.18243000  | -0.97314300 | 1.58119200  |
| C | 5.73348100  | -0.70361600 | -0.27390900 |
| C | 6.36562200  | -1.77833700 | -0.95043300 |
| C | 7.76076800  | -1.79483500 | -1.07790400 |
| C | 8.48097900  | -0.73848400 | -0.52839800 |
| C | 7.83559200  | 0.32427300  | 0.13722200  |
| C | 6.45048800  | 0.36174500  | 0.27748100  |
| C | 4.26419700  | -2.17326400 | -1.01716400 |
| H | 8.25397600  | -2.61272300 | -1.59386400 |
| H | 9.56373400  | -0.72779300 | -0.61285500 |
| H | 8.43264400  | 1.13172800  | 0.55088100  |
| H | 5.95594600  | 1.18121500  | 0.78925300  |
| H | 3.28793000  | -2.60249000 | -1.20259500 |
| N | 4.37891000  | -0.98801800 | -0.33230700 |
| N | 5.41232500  | -2.68150400 | -1.40423900 |
| C | 3.29184600  | -0.20029900 | 0.23819200  |
| H | 3.43517500  | 0.83982400  | -0.06559800 |
| H | 2.35972700  | -0.54404500 | -0.21997000 |
| C | 3.21418600  | -0.32753200 | 1.76653400  |
| H | 3.07977800  | -1.38730000 | 2.01398800  |
| H | 4.18393600  | -0.04121900 | 2.20150100  |

|   |            |             |            |
|---|------------|-------------|------------|
| C | 1.83033400 | 0.12494500  | 3.86138600 |
| H | 0.98118200 | 0.68589000  | 4.26390600 |
| H | 1.61668800 | -0.94310000 | 3.98366700 |
| H | 2.70466100 | 0.34829500  | 4.49227500 |
| C | 2.10059900 | 0.48750500  | 2.41310400 |
| C | 1.79398400 | 1.78361800  | 1.95499900 |
| H | 1.31269800 | 2.49412800  | 2.62587400 |
| H | 2.33966800 | 2.24142800  | 1.13302200 |

**17**

|    |             |             |             |
|----|-------------|-------------|-------------|
| Ni | 0.23672200  | 0.30124600  | 1.47323200  |
| Fe | -4.11910000 | -1.11697800 | -0.82060600 |
| P  | -0.97541200 | -1.37154000 | 0.73733000  |
| P  | -0.41315000 | 1.63476400  | -0.19431900 |
| O  | -0.40604500 | -1.79495200 | -0.62635900 |
| C  | -2.65555100 | -0.65985700 | 0.56386300  |
| C  | -2.87020800 | 0.43808800  | -0.35114900 |
| C  | -4.22613300 | 0.86556500  | -0.22535900 |
| H  | -4.70044000 | 1.64392800  | -0.80528100 |
| C  | -4.86610300 | 0.03361100  | 0.73915600  |
| H  | -5.90914600 | 0.07432800  | 1.02157800  |
| C  | -3.90611800 | -0.90062500 | 1.22601800  |
| H  | -4.11116200 | -1.67805000 | 1.94503000  |
| C  | -1.81105900 | 0.98236400  | -1.26372200 |
| H  | -1.33979600 | 0.12795400  | -1.75497900 |
| C  | -2.32256000 | 1.96305400  | -2.31404500 |
| H  | -2.78260700 | 2.84506400  | -1.86175400 |
| H  | -3.07432200 | 1.47382800  | -2.94145200 |
| H  | -1.50744900 | 2.29666100  | -2.96230700 |
| C  | -4.57622300 | -3.08597100 | -1.27578100 |
| H  | -4.63923000 | -3.88337400 | -0.54956400 |
| C  | -3.39748000 | -2.67434200 | -1.96964600 |
| H  | -2.39609400 | -3.05192500 | -1.82279000 |
| C  | -3.74384700 | -1.56532300 | -2.79727900 |
| H  | -3.05893200 | -1.00178000 | -3.41538400 |
| C  | -5.13439500 | -1.29109100 | -2.61784300 |
| H  | -5.68973000 | -0.48682500 | -3.08065500 |
| C  | -5.64899400 | -2.23231600 | -1.67621000 |
| H  | -6.66274300 | -2.26652300 | -1.30142400 |
| C  | -0.94802800 | 3.30564900  | 0.30704900  |
| C  | -1.43745400 | 3.44372400  | 1.61524000  |
| H  | -1.42320000 | 2.58276500  | 2.27780600  |
| C  | -1.93478500 | 4.66843700  | 2.06001100  |
| H  | -2.31361000 | 4.76191400  | 3.07332600  |

|   |             |             |             |
|---|-------------|-------------|-------------|
| C | -1.93765700 | 5.77124200  | 1.20435800  |
| H | -2.31711500 | 6.72773100  | 1.55123200  |
| C | -1.45177100 | 5.64405200  | -0.09877000 |
| H | -1.45496000 | 6.50006600  | -0.76699600 |
| C | -0.96578000 | 4.41702200  | -0.54984100 |
| H | -0.59903300 | 4.32594000  | -1.56620000 |
| C | 0.98578000  | 1.79251600  | -1.36304200 |
| C | 1.32157800  | 0.65378900  | -2.11860200 |
| H | 0.71251400  | -0.24344400 | -2.04687500 |
| C | 2.48606000  | 0.63889900  | -2.88412700 |
| H | 2.74278700  | -0.25107300 | -3.45058900 |
| C | 3.33721700  | 1.74672900  | -2.89676500 |
| H | 4.25285500  | 1.72352600  | -3.47943400 |
| C | 3.01604000  | 2.87394800  | -2.13986300 |
| H | 3.67708500  | 3.73571900  | -2.13757600 |
| C | 1.84709100  | 2.89912400  | -1.37530500 |
| H | 1.61648600  | 3.77575200  | -0.77995500 |
| C | -1.12403600 | -2.88198500 | 1.84634100  |
| C | -2.10331000 | -3.89022000 | 1.22551200  |
| H | -3.12099300 | -3.50113800 | 1.17610000  |
| H | -2.11946500 | -4.80900100 | 1.82439000  |
| H | -1.79246300 | -4.15430400 | 0.21135900  |
| C | -1.55007300 | -2.49510400 | 3.26754700  |
| H | -0.86139100 | -1.76110300 | 3.69892600  |
| H | -1.54362100 | -3.38219700 | 3.91249500  |
| H | -2.55438300 | -2.06712900 | 3.30377000  |
| C | 0.27568200  | -3.51792200 | 1.88312600  |
| H | 0.60023900  | -3.80007700 | 0.87827400  |
| H | 0.25859300  | -4.41896500 | 2.50735800  |
| H | 1.01793300  | -2.83153700 | 2.30450900  |
| H | 0.45434500  | -0.80763400 | 2.38031200  |
| C | 5.30045600  | -0.93904800 | -0.33264100 |
| C | 5.89350400  | -2.09103500 | -0.90926700 |
| C | 7.23309600  | -2.05030500 | -1.31641900 |
| C | 7.93509000  | -0.86149700 | -1.13897700 |
| C | 7.32562200  | 0.27631000  | -0.57097500 |
| C | 5.99582900  | 0.25908100  | -0.15666400 |
| C | 3.86066200  | -2.60964200 | -0.47435300 |
| H | 7.69831800  | -2.92513000 | -1.75954100 |
| H | 8.97495500  | -0.80399500 | -1.44665500 |
| H | 7.90638900  | 1.18651700  | -0.45463800 |
| H | 5.52417800  | 1.13696400  | 0.27323800  |
| H | 2.90990500  | -3.11824600 | -0.38081800 |
| N | 3.99364200  | -1.30565400 | -0.05965800 |

|   |            |             |             |
|---|------------|-------------|-------------|
| N | 4.96022400 | -3.11919100 | -0.98224200 |
| C | 2.96629500 | -0.46562400 | 0.53312800  |
| H | 3.03260300 | 0.51429900  | 0.05886500  |
| H | 1.99444300 | -0.89048700 | 0.26550500  |
| C | 3.08671700 | -0.35526400 | 2.05794900  |
| H | 3.00343100 | -1.35699900 | 2.49138500  |
| H | 4.08553400 | 0.01730400  | 2.32428300  |
| C | 1.83309300 | 0.35812200  | 4.17829900  |
| H | 0.97879700 | 0.93607200  | 4.53985100  |
| H | 1.67390600 | -0.69288500 | 4.43288600  |
| H | 2.72592800 | 0.69914100  | 4.72025900  |
| C | 2.04613800 | 0.55484000  | 2.69372500  |
| C | 1.65722400 | 1.73505600  | 2.08380500  |
| H | 1.12106700 | 2.48768000  | 2.65522100  |
| H | 2.12804600 | 2.07806800  | 1.17030500  |

### TS10

|    |             |             |             |
|----|-------------|-------------|-------------|
| Ni | 0.22679500  | 0.31395800  | 1.44482400  |
| Fe | -4.12531900 | -1.10265100 | -0.84769600 |
| P  | -0.98815900 | -1.37190600 | 0.71318600  |
| P  | -0.42046900 | 1.65233500  | -0.17414600 |
| O  | -0.44356200 | -1.83224200 | -0.65137900 |
| C  | -2.67040800 | -0.65849500 | 0.54590200  |
| C  | -2.87937000 | 0.45075700  | -0.35683800 |
| C  | -4.23655700 | 0.87659000  | -0.23688200 |
| H  | -4.70717300 | 1.66096900  | -0.81179000 |
| C  | -4.88220300 | 0.03597700  | 0.71626400  |
| H  | -5.92676100 | 0.07461700  | 0.99345600  |
| C  | -3.92460900 | -0.90279200 | 1.19983400  |
| H  | -4.13360700 | -1.68694300 | 1.91028300  |
| C  | -1.81352800 | 1.00567300  | -1.25503000 |
| H  | -1.33798800 | 0.15628200  | -1.75121100 |
| C  | -2.31671100 | 1.99501700  | -2.30127600 |
| H  | -2.78010300 | 2.87354800  | -1.84562700 |
| H  | -3.06383000 | 1.51016000  | -2.93739700 |
| H  | -1.49688600 | 2.33316100  | -2.94121900 |
| C  | -3.37565000 | -2.63964200 | -2.00560400 |
| H  | -2.36439800 | -2.99081000 | -1.85790900 |
| C  | -3.74908200 | -1.53499400 | -2.82765800 |
| H  | -3.07864700 | -0.95495300 | -3.44652800 |
| C  | -5.14440200 | -1.28998000 | -2.64184300 |
| H  | -5.71826500 | -0.49639200 | -3.10051800 |
| C  | -5.63525200 | -2.24486600 | -1.70116700 |
| H  | -6.64647400 | -2.30156500 | -1.32220100 |

|   |             |             |             |
|---|-------------|-------------|-------------|
| C | -4.54282100 | -3.07725200 | -1.30807100 |
| H | -4.58531600 | -3.87695700 | -0.58280300 |
| C | -0.92916300 | 3.33175900  | 0.32104300  |
| C | -1.40313200 | 3.49225700  | 1.63194800  |
| H | -1.39683400 | 2.63929800  | 2.30441000  |
| C | -1.87524700 | 4.73035900  | 2.06708200  |
| H | -2.24277400 | 4.84174600  | 3.08271300  |
| C | -1.86726800 | 5.82339800  | 1.19910600  |
| H | -2.22719300 | 6.79001000  | 1.53864800  |
| C | -1.39516200 | 5.67378400  | -0.10675000 |
| H | -1.38888800 | 6.52249600  | -0.78416100 |
| C | -0.93447000 | 4.43380200  | -0.54824300 |
| H | -0.57608800 | 4.32536500  | -1.56582700 |
| C | 0.99692700  | 1.78179900  | -1.32318600 |
| C | 1.32416300  | 0.63579400  | -2.07123000 |
| H | 0.70265800  | -0.25365800 | -2.00348100 |
| C | 2.49800400  | 0.60185300  | -2.82221100 |
| H | 2.74905200  | -0.29376700 | -3.38224400 |
| C | 3.36540500  | 1.69677900  | -2.82678600 |
| H | 4.28838000  | 1.65808200  | -3.39682200 |
| C | 3.05170500  | 2.83084000  | -2.07643400 |
| H | 3.72590200  | 3.68230900  | -2.06792700 |
| C | 1.87432300  | 2.87551200  | -1.32626800 |
| H | 1.64929500  | 3.75625000  | -0.73482600 |
| C | -1.13320600 | -2.84825900 | 1.86774500  |
| C | -2.12448800 | -3.87345100 | 1.29642300  |
| H | -3.14339500 | -3.48631300 | 1.25918900  |
| H | -2.12813400 | -4.77675500 | 1.91899500  |
| H | -1.83585400 | -4.16400700 | 0.28255600  |
| C | -1.53652400 | -2.40152000 | 3.27826600  |
| H | -0.83803100 | -1.65237400 | 3.66643900  |
| H | -1.52305200 | -3.25920100 | 3.96202300  |
| H | -2.53876200 | -1.96783400 | 3.31130400  |
| C | 0.26308500  | -3.49016600 | 1.91175200  |
| H | 0.58054900  | -3.79967800 | 0.91253000  |
| H | 0.24782400  | -4.37426000 | 2.55996400  |
| H | 1.01150600  | -2.79677900 | 2.31024200  |
| C | 5.28747100  | -0.93572700 | -0.34524100 |
| C | 5.91215200  | -2.05611100 | -0.95002400 |
| C | 7.24326700  | -1.96153900 | -1.37543800 |
| C | 7.90570700  | -0.75187400 | -1.18742400 |
| C | 7.26536800  | 0.35371100  | -0.59041300 |
| C | 5.94339500  | 0.28272100  | -0.15726100 |
| C | 3.90439900  | -2.65259000 | -0.49941800 |

|   |            |             |             |
|---|------------|-------------|-------------|
| H | 7.73195900 | -2.81184500 | -1.84046400 |
| H | 8.93813000 | -0.65234200 | -1.50910700 |
| H | 7.81583400 | 1.28150300  | -0.46592300 |
| H | 5.44844600 | 1.13555600  | 0.29600100  |
| H | 2.97303400 | -3.19557400 | -0.40379700 |
| N | 3.99751800 | -1.35226900 | -0.06291300 |
| N | 5.01422100 | -3.11480600 | -1.02950800 |
| C | 2.94673700 | -0.55655400 | 0.54929800  |
| H | 2.99042400 | 0.43748700  | 0.10340400  |
| H | 1.98599400 | -0.99547300 | 0.26450300  |
| C | 3.05576400 | -0.48058300 | 2.07683800  |
| H | 3.01501000 | -1.49498000 | 2.48732100  |
| H | 4.03047500 | -0.06336500 | 2.36139100  |
| C | 1.78362200 | 0.16987800  | 4.20951300  |
| H | 0.91287400 | 0.71631900  | 4.58090700  |
| H | 1.66822300 | -0.88603000 | 4.47039000  |
| H | 2.67089900 | 0.54917000  | 4.73229300  |
| C | 1.96161900 | 0.37065200  | 2.71587200  |
| C | 1.62663100 | 1.61594900  | 2.14814800  |
| H | 1.13511100 | 2.36109500  | 2.76862300  |
| H | 2.17991600 | 2.00627700  | 1.30063100  |
| H | 0.68779500 | -0.73153900 | 2.36493700  |

**18**

|    |             |             |             |
|----|-------------|-------------|-------------|
| Ni | 0.19912000  | 0.29817500  | 1.43528800  |
| Fe | -4.16990500 | -0.99042500 | -0.89768500 |
| P  | -1.05531200 | -1.39017400 | 0.67584600  |
| P  | -0.36350200 | 1.63345800  | -0.14135200 |
| O  | -0.55277100 | -1.91177300 | -0.68708800 |
| C  | -2.71584400 | -0.62606900 | 0.51454900  |
| C  | -2.86867700 | 0.50678500  | -0.36969800 |
| C  | -4.20992300 | 0.98459500  | -0.26139600 |
| H  | -4.64254500 | 1.79544200  | -0.82950900 |
| C  | -4.89968200 | 0.15646900  | 0.67190100  |
| H  | -5.94507400 | 0.23332600  | 0.93800000  |
| C  | -3.98569600 | -0.82753000 | 1.15198700  |
| H  | -4.23376400 | -1.61389500 | 1.84748900  |
| C  | -1.76607900 | 1.03125600  | -1.24139300 |
| H  | -1.30966900 | 0.17017600  | -1.73596300 |
| C  | -2.21191400 | 2.04497200  | -2.29086600 |
| H  | -2.65837300 | 2.93424600  | -1.83945100 |
| H  | -2.95854900 | 1.58666500  | -2.94686900 |
| H  | -1.36750800 | 2.36110500  | -2.90978400 |
| C  | -3.46010000 | -2.55384700 | -2.04401700 |



|   |             |             |             |
|---|-------------|-------------|-------------|
| H | -2.46493700 | -2.93941400 | -1.87250800 |
| C | -3.77385400 | -1.43375400 | -2.87083000 |
| H | -3.06918800 | -0.88091200 | -3.47639300 |
| C | -5.16169100 | -1.13339700 | -2.71151100 |
| H | -5.69549100 | -0.31842200 | -3.18101600 |
| C | -5.70811700 | -2.06856200 | -1.78165900 |
| H | -6.72803100 | -2.08568900 | -1.42259500 |
| C | -4.65680300 | -2.94403100 | -1.36916500 |
| H | -4.74423400 | -3.74007200 | -0.64367200 |
| C | -0.81265100 | 3.32759800  | 0.35315500  |
| C | -1.29517900 | 3.51441900  | 1.65686400  |
| H | -1.32687800 | 2.66788500  | 2.33597000  |
| C | -1.72551600 | 4.77262800  | 2.07668600  |
| H | -2.10025600 | 4.90540300  | 3.08704500  |
| C | -1.66623800 | 5.85817400  | 1.20117700  |
| H | -1.99359400 | 6.84005400  | 1.52965800  |
| C | -1.18421500 | 5.68162400  | -0.09753600 |
| H | -1.13702200 | 6.52439100  | -0.78063200 |
| C | -0.76552100 | 4.42195200  | -0.52462800 |
| H | -0.39856800 | 4.29203700  | -1.53647900 |
| C | 1.07780000  | 1.69463400  | -1.26112600 |
| C | 1.36692300  | 0.53074600  | -1.99688300 |
| H | 0.70877400  | -0.33294000 | -1.93112600 |
| C | 2.54934700  | 0.44516100  | -2.73067100 |
| H | 2.77410000  | -0.46462900 | -3.27871700 |
| C | 3.45894200  | 1.50485300  | -2.72991100 |
| H | 4.38935900  | 1.42392200  | -3.28265800 |
| C | 3.17977500  | 2.65703000  | -1.99284200 |
| H | 3.88810200  | 3.48020100  | -1.98040000 |
| C | 1.99642200  | 2.75371500  | -1.25815500 |
| H | 1.79921600  | 3.64498700  | -0.67262700 |
| C | -1.23609400 | -2.82289900 | 1.88184600  |
| C | -2.25556900 | -3.84608500 | 1.36048200  |
| H | -3.26686000 | -3.43822300 | 1.32032700  |
| H | -2.27339800 | -4.72865700 | 2.01262100  |
| H | -1.98541500 | -4.17619200 | 0.35332100  |
| C | -1.61543900 | -2.29924000 | 3.27305400  |
| H | -0.89454500 | -1.55024700 | 3.62175200  |
| H | -1.61799200 | -3.12090600 | 4.00010000  |
| H | -2.60522700 | -1.83698300 | 3.29166500  |
| C | 0.14569800  | -3.49543100 | 1.94760900  |
| H | 0.45479800  | -3.84754900 | 0.95978500  |
| H | 0.11353000  | -4.35533600 | 2.62730700  |
| H | 0.91351000  | -2.80841100 | 2.32060800  |

|   |            |             |             |
|---|------------|-------------|-------------|
| C | 5.23229600 | -0.95166700 | -0.38026500 |
| C | 5.90926900 | -2.02979300 | -1.00487700 |
| C | 7.20333000 | -1.83886500 | -1.50584100 |
| C | 7.77733200 | -0.57807400 | -1.37080700 |
| C | 7.08604000 | 0.48365800  | -0.75111900 |
| C | 5.79995900 | 0.31673400  | -0.24295100 |
| C | 3.98045000 | -2.77158100 | -0.44021600 |
| H | 7.73098500 | -2.65603500 | -1.98736800 |
| H | 8.77924800 | -0.40351900 | -1.75158200 |
| H | 7.56791100 | 1.45333900  | -0.66843100 |
| H | 5.26480800 | 1.13573200  | 0.22585900  |
| H | 3.10136800 | -3.38442300 | -0.28869700 |
| N | 3.99445300 | -1.46088600 | -0.02568700 |
| N | 5.09358200 | -3.15569900 | -1.02294700 |
| C | 2.91807600 | -0.73124900 | 0.62318000  |
| H | 2.88756700 | 0.26243200  | 0.17714900  |
| H | 1.97544000 | -1.22302500 | 0.36275000  |
| C | 3.06883000 | -0.63725500 | 2.14590500  |
| H | 3.14492700 | -1.64788800 | 2.56311700  |
| H | 3.99677300 | -0.11317700 | 2.40123300  |
| C | 1.89521200 | 0.02061500  | 4.32723500  |
| H | 1.01204300 | 0.51060800  | 4.74703500  |
| H | 1.91514900 | -1.01679500 | 4.67757000  |
| H | 2.78338800 | 0.52981400  | 4.71538600  |
| C | 1.88487500 | 0.09962100  | 2.79694700  |
| C | 1.56608900 | 1.43353300  | 2.22316900  |
| H | 1.16098400 | 2.16523200  | 2.92263600  |
| H | 2.28360600 | 1.86743100  | 1.53029500  |
| H | 0.97064400 | -0.64658800 | 2.55501000  |

**19**

|    |             |             |             |
|----|-------------|-------------|-------------|
| Fe | -3.21006300 | -1.71503300 | 1.09824200  |
| P  | -1.86554100 | 0.14601900  | -1.55871600 |
| P  | 0.02615800  | 1.63917700  | 0.53112900  |
| O  | -3.02889700 | 1.12833700  | -1.29950500 |
| C  | -1.75232100 | -1.07361700 | -0.20074200 |
| C  | -1.52650200 | -0.54478600 | 1.12452000  |
| C  | -1.35107800 | -1.64105500 | 2.02175200  |
| H  | -1.20450200 | -1.57124400 | 3.08994400  |
| C  | -1.47459400 | -2.84633500 | 1.27074500  |
| H  | -1.42987900 | -3.85027300 | 1.66973700  |
| C  | -1.71476800 | -2.50175000 | -0.09173000 |
| H  | -1.87370700 | -3.20921900 | -0.89128600 |
| C  | -1.48561900 | 0.92655200  | 1.40838300  |

|   |             |             |             |
|---|-------------|-------------|-------------|
| H | -2.32226700 | 1.38085300  | 0.87341800  |
| C | -1.54337300 | 1.29993000  | 2.88673300  |
| H | -0.71611500 | 0.86695900  | 3.45356800  |
| H | -2.48022600 | 0.92945100  | 3.31457400  |
| H | -1.51721000 | 2.38566600  | 3.01826800  |
| C | -5.03571800 | -2.31732200 | 0.34012400  |
| H | -5.14982900 | -2.90404900 | -0.56039000 |
| C | -4.97289900 | -0.89179500 | 0.40782700  |
| H | -4.95411300 | -0.20387400 | -0.42552200 |
| C | -4.75887500 | -0.53062300 | 1.77155200  |
| H | -4.62406100 | 0.47631000  | 2.14106100  |
| C | -4.69050300 | -1.72862100 | 2.54750700  |
| H | -4.50318400 | -1.78907600 | 3.61086500  |
| C | -4.86134900 | -2.83502900 | 1.66088000  |
| H | -4.82625500 | -3.88052000 | 1.93487300  |
| C | 1.36094600  | 1.29153200  | 1.71857600  |
| C | 1.96618100  | 0.02692400  | 1.63948400  |
| H | 1.66798900  | -0.67059100 | 0.86430400  |
| C | 2.94403200  | -0.34400000 | 2.56272600  |
| H | 3.41008200  | -1.31968700 | 2.48132000  |
| C | 3.32217100  | 0.54046600  | 3.57325900  |
| H | 4.09108900  | 0.25504400  | 4.28502700  |
| C | 2.70208500  | 1.78715400  | 3.67689600  |
| H | 2.97738800  | 2.46953900  | 4.47554400  |
| C | 1.71872200  | 2.16022200  | 2.76138100  |
| H | 1.22713800  | 3.11948000  | 2.87083200  |
| C | -0.29576400 | 3.42985400  | 0.39830900  |
| C | -1.55014100 | 3.80259000  | -0.11967400 |
| H | -2.27718300 | 3.04022500  | -0.39585900 |
| C | -1.83638700 | 5.14874600  | -0.34199400 |
| H | -2.80747300 | 5.42765100  | -0.74024600 |
| C | -0.88180900 | 6.13083400  | -0.06957300 |
| H | -1.11070900 | 7.17794400  | -0.24429300 |
| C | 0.37479800  | 5.76022200  | 0.41067200  |
| H | 1.13011000  | 6.51567800  | 0.60605800  |
| C | 0.67176900  | 4.41601300  | 0.63714200  |
| H | 1.66022000  | 4.14481000  | 0.98617200  |
| C | -2.21383400 | -0.80009700 | -3.14616200 |
| C | -3.51922400 | -1.59612900 | -3.01897000 |
| H | -3.43949900 | -2.39823400 | -2.28212000 |
| H | -3.78387100 | -2.04759300 | -3.98410300 |
| H | -4.33888700 | -0.93884700 | -2.71623100 |
| C | -1.03605700 | -1.71131700 | -3.50622900 |
| H | -0.12708300 | -1.12077900 | -3.67599500 |

|    |             |             |             |
|----|-------------|-------------|-------------|
| H  | -1.24325900 | -2.25313100 | -4.43763900 |
| H  | -0.82426200 | -2.45228000 | -2.73181200 |
| C  | -2.37598000 | 0.27718400  | -4.23209800 |
| H  | -3.20067400 | 0.95213900  | -3.99039200 |
| H  | -2.57769900 | -0.19035200 | -5.20376700 |
| H  | -1.46619800 | 0.88307400  | -4.33206400 |
| H  | 1.36167200  | -1.71793600 | -2.27614900 |
| Ni | 0.26689500  | 0.95776300  | -1.46563100 |
| C  | 4.12984200  | -2.23997900 | -0.68563500 |
| C  | 3.16064300  | -2.98402100 | 0.03832500  |
| C  | 3.53875800  | -3.70280400 | 1.17925700  |
| C  | 4.87409900  | -3.65338700 | 1.56858700  |
| C  | 5.82435200  | -2.90658600 | 0.84111400  |
| C  | 5.47157600  | -2.18843600 | -0.29857500 |
| C  | 2.12166300  | -2.05551700 | -1.58770900 |
| H  | 2.80148400  | -4.27259700 | 1.73558600  |
| H  | 5.19532800  | -4.19958300 | 2.45030600  |
| H  | 6.85663800  | -2.89247200 | 1.17725900  |
| H  | 6.20772400  | -1.61845300 | -0.85516400 |
| H  | 3.14165100  | 0.45183900  | -0.39816000 |
| N  | 3.42987500  | -1.65998800 | -1.73353000 |
| N  | 1.91138600  | -2.83974300 | -0.55405300 |
| C  | 3.93177100  | -0.71478300 | -2.72685800 |
| H  | 4.76593100  | -1.17688100 | -3.26484500 |
| H  | 3.12495800  | -0.56858800 | -3.44916300 |
| C  | 4.36579400  | 0.62450100  | -2.11447400 |
| H  | 5.30928200  | 0.47898400  | -1.57580700 |
| H  | 4.57611800  | 1.31855100  | -2.93820800 |
| C  | 3.96114300  | 2.40691200  | -0.38103200 |
| H  | 3.25769300  | 2.80508500  | 0.35356500  |
| H  | 4.86198000  | 2.09810400  | 0.16080200  |
| H  | 4.23370300  | 3.22004100  | -1.06499700 |
| C  | 3.34062700  | 1.23133000  | -1.13921500 |
| C  | 2.01850000  | 1.62967900  | -1.79303700 |
| H  | 1.96658100  | 2.70891800  | -1.98681100 |
| H  | 1.85897500  | 1.11096000  | -2.77803600 |

### TS11

|    |             |             |             |
|----|-------------|-------------|-------------|
| Fe | -3.95592900 | -1.34924600 | 0.06570500  |
| P  | -0.49028700 | -1.59383900 | -0.37280100 |
| P  | -0.45897700 | 1.74775700  | -0.05430200 |
| O  | -0.64350300 | -1.26195200 | -1.85545700 |
| C  | -1.96517200 | -1.14110500 | 0.58870900  |
| C  | -2.59804300 | 0.14558300  | 0.39970300  |

|   |             |             |             |
|---|-------------|-------------|-------------|
| C | -3.66208100 | 0.25538200  | 1.34325600  |
| H | -4.34842400 | 1.08554400  | 1.42585200  |
| C | -3.72058600 | -0.95465700 | 2.09337700  |
| H | -4.45439800 | -1.19903900 | 2.84887600  |
| C | -2.68331300 | -1.81453100 | 1.63465800  |
| H | -2.50149200 | -2.81333600 | 1.99745300  |
| C | -2.15162200 | 1.15975200  | -0.60708600 |
| H | -1.92943300 | 0.62969600  | -1.53606100 |
| C | -3.15766500 | 2.27564300  | -0.87320700 |
| H | -3.39982700 | 2.83594400  | 0.03243600  |
| H | -4.08618000 | 1.84711600  | -1.26242100 |
| H | -2.77002300 | 2.97782200  | -1.61648200 |
| C | -4.71739500 | -3.07915600 | -0.79007000 |
| H | -4.44261500 | -4.08257700 | -0.49930700 |
| C | -4.06485300 | -2.28010300 | -1.77785900 |
| H | -3.18069300 | -2.54206600 | -2.33938000 |
| C | -4.72150400 | -1.01532400 | -1.82284400 |
| H | -4.43288900 | -0.17758300 | -2.44152400 |
| C | -5.77776000 | -1.02841900 | -0.86138600 |
| H | -6.43315200 | -0.20180900 | -0.62422900 |
| C | -5.77510100 | -2.30534000 | -0.22355000 |
| H | -6.43185100 | -2.61637800 | 0.57715800  |
| C | -0.81088900 | 2.92093100  | 1.29546200  |
| C | -0.59957600 | 2.46398300  | 2.60514000  |
| H | -0.17200900 | 1.47811700  | 2.76009300  |
| C | -0.92620400 | 3.26969900  | 3.69506100  |
| H | -0.75818300 | 2.90529300  | 4.70385500  |
| C | -1.45961500 | 4.54274800  | 3.48708300  |
| H | -1.70727200 | 5.17370200  | 4.33547600  |
| C | -1.67419700 | 5.00521100  | 2.18713900  |
| H | -2.09034200 | 5.99456500  | 2.02232900  |
| C | -1.35828700 | 4.19768500  | 1.09478600  |
| H | -1.53822900 | 4.56298400  | 0.09008700  |
| C | 0.18760700  | 2.65092200  | -1.50402400 |
| C | 0.26271800  | 1.92337600  | -2.70569400 |
| H | -0.11065500 | 0.90268700  | -2.74550000 |
| C | 0.85881100  | 2.49236300  | -3.82955300 |
| H | 0.91366700  | 1.92306000  | -4.75271600 |
| C | 1.39395800  | 3.78178400  | -3.76729600 |
| H | 1.86136600  | 4.22041100  | -4.64380500 |
| C | 1.33477000  | 4.50013800  | -2.57291000 |
| H | 1.75846300  | 5.49828900  | -2.51461100 |
| C | 0.73717300  | 3.93806400  | -1.44294000 |
| H | 0.71366000  | 4.49968800  | -0.51628500 |

|    |             |             |             |
|----|-------------|-------------|-------------|
| C  | -0.13450700 | -3.41824800 | -0.10304800 |
| C  | -1.34718100 | -4.25270100 | -0.53960800 |
| H  | -2.22539700 | -4.05437900 | 0.07536100  |
| H  | -1.10069500 | -5.31732500 | -0.44777700 |
| H  | -1.60693000 | -4.05813900 | -1.58330200 |
| C  | 0.23672800  | -3.71045200 | 1.35932600  |
| H  | 1.11020400  | -3.14036000 | 1.68622200  |
| H  | 0.48454900  | -4.77459600 | 1.45531600  |
| H  | -0.58313700 | -3.50396900 | 2.05011800  |
| C  | 1.05601400  | -3.75555600 | -1.02130400 |
| H  | 0.83151400  | -3.50935400 | -2.06231300 |
| H  | 1.26460700  | -4.82949200 | -0.95581000 |
| H  | 1.96692700  | -3.22615500 | -0.73297300 |
| H  | 1.15665200  | -1.30902900 | 0.29561300  |
| Ni | 1.02894700  | 0.20850600  | 0.44312000  |
| C  | 4.56059100  | -1.66385100 | -0.11369500 |
| C  | 4.29593500  | -2.16355400 | 1.19038400  |
| C  | 5.25773800  | -2.94383700 | 1.84476300  |
| C  | 6.46150300  | -3.18707400 | 1.18870200  |
| C  | 6.71506400  | -2.66975400 | -0.09781500 |
| C  | 5.76960200  | -1.89876200 | -0.77160600 |
| C  | 2.55359200  | -1.02175600 | 0.61415100  |
| H  | 5.06240300  | -3.33596300 | 2.83812200  |
| H  | 7.22546900  | -3.78493500 | 1.67694400  |
| H  | 7.66886100  | -2.87627000 | -0.57430400 |
| H  | 5.96764700  | -1.50106600 | -1.76199200 |
| H  | 4.28356500  | 0.91445100  | 0.89755900  |
| N  | 3.41563600  | -0.97676800 | -0.47161700 |
| N  | 3.03543300  | -1.75618100 | 1.60568600  |
| C  | 3.25144700  | 0.00492300  | -1.53476700 |
| H  | 3.73230800  | -0.36908900 | -2.44265400 |
| H  | 2.17873800  | 0.06347800  | -1.73638400 |
| C  | 3.80152500  | 1.38589300  | -1.12854000 |
| H  | 4.85835500  | 1.45063500  | -1.41426800 |
| H  | 3.26808900  | 2.15064100  | -1.70548800 |
| C  | 4.36174500  | 3.03543600  | 0.68110000  |
| H  | 4.33608500  | 3.25425300  | 1.75405400  |
| H  | 5.41063300  | 3.04926000  | 0.36004700  |
| H  | 3.84144600  | 3.84958200  | 0.16179700  |
| C  | 3.69740400  | 1.68255800  | 0.38013800  |
| C  | 2.27202700  | 1.66233000  | 0.95017300  |
| H  | 2.30929800  | 1.53935100  | 2.03976100  |
| H  | 1.81003100  | 2.63470200  | 0.75523100  |

**TS9'**

|    |             |             |             |
|----|-------------|-------------|-------------|
| Ni | 0.32141800  | 1.01510500  | -1.11184100 |
| Fe | -2.66070900 | -2.58919600 | 1.07649000  |
| P  | -0.95574800 | -1.06086800 | -1.60170800 |
| P  | -1.24478800 | 1.80545500  | 0.19557800  |
| O  | -2.20519500 | -0.49113100 | -2.24524100 |
| C  | -1.16117800 | -1.51288400 | 0.13562400  |
| C  | -1.90389600 | -0.67401000 | 1.05170000  |
| C  | -1.75854400 | -1.22770400 | 2.35724000  |
| H  | -2.22139700 | -0.84507100 | 3.25508500  |
| C  | -0.96787100 | -2.41004000 | 2.26422100  |
| H  | -0.72677700 | -3.07981200 | 3.07798200  |
| C  | -0.59884700 | -2.59149400 | 0.90163700  |
| H  | -0.03149700 | -3.42219100 | 0.51253300  |
| C  | -2.61053200 | 0.58890800  | 0.66302300  |
| H  | -3.10064800 | 0.40873000  | -0.29648200 |
| C  | -3.63405700 | 1.08432400  | 1.67943800  |
| H  | -3.18208000 | 1.29541000  | 2.65151800  |
| H  | -4.41275300 | 0.32890100  | 1.82687400  |
| H  | -4.11530900 | 1.99951400  | 1.32326000  |
| C  | -3.42045200 | -4.40064300 | 0.40230400  |
| H  | -2.82657400 | -5.19377700 | -0.02893700 |
| C  | -4.02340000 | -3.31922100 | -0.30869800 |
| H  | -3.96000500 | -3.13670200 | -1.37069800 |
| C  | -4.68232500 | -2.48079400 | 0.63688800  |
| H  | -5.20383500 | -1.56244700 | 0.40742800  |
| C  | -4.48699200 | -3.04134100 | 1.93553800  |
| H  | -4.83498100 | -2.61969900 | 2.86843600  |
| C  | -3.70711500 | -4.22822400 | 1.79038200  |
| H  | -3.35961900 | -4.86122600 | 2.59524000  |
| C  | -0.68502300 | 2.44478700  | 1.82090100  |
| C  | 0.53089400  | 1.94997500  | 2.31555100  |
| H  | 1.10911300  | 1.26851900  | 1.70120000  |
| C  | 0.99568300  | 2.32514900  | 3.57633400  |
| H  | 1.93813100  | 1.93033900  | 3.94449900  |
| C  | 0.25245200  | 3.21143500  | 4.35679500  |
| H  | 0.61463500  | 3.51144900  | 5.33570000  |
| C  | -0.95850800 | 3.71385300  | 3.87482100  |
| H  | -1.54055700 | 4.40359300  | 4.47909200  |
| C  | -1.42829500 | 3.32992800  | 2.61890800  |
| H  | -2.37133300 | 3.72499500  | 2.25814800  |
| C  | -2.14005400 | 3.16626300  | -0.64091600 |
| C  | -2.98051100 | 2.82040600  | -1.71447700 |
| H  | -3.10796700 | 1.77593800  | -1.98565200 |

|   |             |             |             |
|---|-------------|-------------|-------------|
| C | -3.61081300 | 3.81418800  | -2.46125500 |
| H | -4.26168600 | 3.53376500  | -3.28442400 |
| C | -3.39742300 | 5.16275000  | -2.16460900 |
| H | -3.88802700 | 5.93491300  | -2.74985800 |
| C | -2.53815800 | 5.51249000  | -1.12287100 |
| H | -2.35325500 | 6.55862500  | -0.89601100 |
| C | -1.90914200 | 4.52168400  | -0.36631900 |
| H | -1.23645300 | 4.80834600  | 0.43444500  |
| C | -0.28205200 | -2.51144100 | -2.57157300 |
| C | -1.20441700 | -3.72965000 | -2.43880900 |
| H | -1.25831500 | -4.09014700 | -1.41018900 |
| H | -0.82763600 | -4.54402400 | -3.06869100 |
| H | -2.21744900 | -3.49157200 | -2.77302800 |
| C | 1.15084600  | -2.85437200 | -2.13796400 |
| H | 1.81016100  | -1.98426200 | -2.21054500 |
| H | 1.55681200  | -3.62730500 | -2.80019600 |
| H | 1.20654000  | -3.23911300 | -1.11730200 |
| C | -0.26488400 | -2.03091000 | -4.03481600 |
| H | -1.26919700 | -1.77626400 | -4.37997700 |
| H | 0.13716100  | -2.82503500 | -4.67404800 |
| H | 0.36901300  | -1.14621500 | -4.16050600 |
| H | 0.39791600  | -0.34785900 | -1.82221800 |
| C | 5.64026500  | -0.33523500 | 0.42021400  |
| C | 6.23582200  | -1.56766700 | 0.79259000  |
| C | 7.62002600  | -1.63718500 | 0.99637200  |
| C | 8.36549000  | -0.47519500 | 0.82312100  |
| C | 7.75598900  | 0.74232300  | 0.45544200  |
| C | 6.38237500  | 0.83563700  | 0.24641300  |
| C | 4.13694800  | -1.94142300 | 0.60883600  |
| H | 8.08549400  | -2.57531900 | 1.28155900  |
| H | 9.44053800  | -0.50191000 | 0.97396700  |
| H | 8.37257400  | 1.62746400  | 0.33092600  |
| H | 5.91604000  | 1.77354500  | -0.03742700 |
| H | 3.15509500  | -2.39690700 | 0.59405600  |
| N | 4.28617200  | -0.60834300 | 0.30957600  |
| N | 5.26135500  | -2.55314800 | 0.90154700  |
| C | 3.23263600  | 0.32155200  | -0.07382600 |
| H | 2.27409800  | -0.13216400 | 0.19789100  |
| H | 3.34485500  | 1.22894100  | 0.52634000  |
| C | 1.92438700  | 1.59227600  | -3.53649400 |
| H | 1.88882500  | 0.59939800  | -3.99819500 |
| H | 2.77895800  | 2.12287000  | -3.98376700 |
| C | 3.23559400  | 0.64370300  | -1.57128300 |
| H | 3.21855700  | -0.30520900 | -2.12003300 |



|   |            |            |             |
|---|------------|------------|-------------|
| H | 4.18851800 | 1.12495500 | -1.83853100 |
| C | 2.06990300 | 1.50804200 | -2.02895800 |
| C | 1.56807400 | 2.55286600 | -1.23039100 |
| H | 1.98685700 | 2.78326900 | -0.25326800 |
| H | 1.04170100 | 3.38127700 | -1.70217700 |
| H | 1.01402100 | 2.12767100 | -3.82142400 |

**17'**

|    |             |             |             |
|----|-------------|-------------|-------------|
| Ni | 0.34394300  | 0.70098700  | -1.16237900 |
| Fe | -3.19906200 | -2.22821200 | 1.07400900  |
| P  | -1.11748900 | -0.91370800 | -1.45347200 |
| P  | -0.99641300 | 1.79258300  | 0.24418400  |
| O  | -2.39057100 | -0.36345000 | -2.11141300 |
| C  | -1.46141000 | -1.44493700 | 0.26715500  |
| C  | -2.08684800 | -0.50922600 | 1.17432000  |
| C  | -2.14654300 | -1.11086100 | 2.46693000  |
| H  | -2.59279300 | -0.67356300 | 3.34858800  |
| C  | -1.59061400 | -2.41990700 | 2.37254600  |
| H  | -1.53701200 | -3.14701300 | 3.17133400  |
| C  | -1.16787800 | -2.62696800 | 1.02634900  |
| H  | -0.73685200 | -3.54095100 | 0.64867100  |
| C  | -2.54194000 | 0.85948300  | 0.76466500  |
| H  | -3.08253500 | 0.75492400  | -0.17907200 |
| C  | -3.41074900 | 1.57914000  | 1.78962200  |
| H  | -2.89223100 | 1.72067400  | 2.74088500  |
| H  | -4.31529400 | 0.99380500  | 1.98274400  |
| H  | -3.71709000 | 2.56092600  | 1.41724200  |
| C  | -4.23401600 | -3.74705000 | 0.11633600  |
| H  | -3.76719400 | -4.58622800 | -0.37883700 |
| C  | -4.54096500 | -2.48507700 | -0.47853300 |
| H  | -4.30402400 | -2.16850200 | -1.48353600 |
| C  | -5.10630500 | -1.65254700 | 0.53156300  |
| H  | -5.40655100 | -0.62202300 | 0.40245900  |
| C  | -5.14830600 | -2.39565200 | 1.75089500  |
| H  | -5.49028100 | -2.02850000 | 2.70884300  |
| C  | -4.60908000 | -3.69219900 | 1.49333600  |
| H  | -4.46902300 | -4.47845100 | 2.22241900  |
| C  | -0.25205800 | 2.30050200  | 1.83321900  |
| C  | 0.81067100  | 1.51460300  | 2.30624100  |
| H  | 1.17533700  | 0.69636400  | 1.69432000  |
| C  | 1.38761400  | 1.76963300  | 3.54979500  |
| H  | 2.20648600  | 1.14990400  | 3.90269500  |
| C  | 0.91199900  | 2.82109400  | 4.33478200  |
| H  | 1.36408500  | 3.02743900  | 5.30023800  |

|   |             |             |             |
|---|-------------|-------------|-------------|
| C | -0.15093600 | 3.60353800  | 3.87902400  |
| H | -0.53020400 | 4.41606900  | 4.49152500  |
| C | -0.73749400 | 3.34119300  | 2.64059900  |
| H | -1.57546100 | 3.94349700  | 2.30936900  |
| C | -1.63388500 | 3.25934100  | -0.63726500 |
| C | -2.44924300 | 2.99150000  | -1.75303700 |
| H | -2.69254500 | 1.96131100  | -2.00827400 |
| C | -2.90068400 | 4.03960400  | -2.55276300 |
| H | -3.53265200 | 3.82485900  | -3.40953600 |
| C | -2.53335400 | 5.35689100  | -2.26493600 |
| H | -2.88607500 | 6.17047900  | -2.89182400 |
| C | -1.69943400 | 5.62200700  | -1.17869000 |
| H | -1.39678200 | 6.64176500  | -0.95924500 |
| C | -1.24635000 | 4.57854600  | -0.36826900 |
| H | -0.58491800 | 4.79711300  | 0.46226400  |
| C | -0.53208000 | -2.43220600 | -2.39443500 |
| C | -1.60635200 | -3.52777600 | -2.32981800 |
| H | -1.75596600 | -3.89463100 | -1.31349500 |
| H | -1.30950500 | -4.37628600 | -2.95833500 |
| H | -2.56356100 | -3.15254600 | -2.69978500 |
| C | 0.80994900  | -2.95128500 | -1.86278900 |
| H | 1.58096700  | -2.17878600 | -1.93434800 |
| H | 1.14092500  | -3.80806700 | -2.46184300 |
| H | 0.75223100  | -3.27911400 | -0.82180200 |
| C | -0.36243300 | -1.98484200 | -3.85562500 |
| H | -1.30523300 | -1.61008700 | -4.26195200 |
| H | -0.02945100 | -2.83206300 | -4.46686400 |
| H | 0.38430600  | -1.18822900 | -3.94479000 |
| H | 0.93152300  | -0.22390000 | -2.11007000 |
| C | 5.65628000  | -0.76198900 | 0.38727800  |
| C | 6.27541800  | -2.02852800 | 0.54021000  |
| C | 7.63801400  | -2.10141300 | 0.85578800  |
| C | 8.33833200  | -0.90855400 | 1.00842300  |
| C | 7.70539500  | 0.34200800  | 0.85379300  |
| C | 6.35193200  | 0.43935900  | 0.53978200  |
| C | 4.21991600  | -2.41360900 | 0.07788800  |
| H | 8.12213300  | -3.06530400 | 0.97586200  |
| H | 9.39611900  | -0.93698000 | 1.25195500  |
| H | 8.28698600  | 1.25006100  | 0.98134000  |
| H | 5.86702000  | 1.40308200  | 0.42025600  |
| H | 3.26794500  | -2.88203200 | -0.13602700 |
| N | 4.33156500  | -1.04240300 | 0.09290200  |
| N | 5.34332300  | -3.04050500 | 0.33903800  |
| C | 3.28394700  | -0.07582700 | -0.19281800 |

|   |            |             |             |
|---|------------|-------------|-------------|
| H | 2.31725300 | -0.57200400 | -0.06073000 |
| H | 3.34988800 | 0.72234900  | 0.55145700  |
| C | 3.37278600 | 0.48177600  | -1.61625000 |
| H | 4.32841600 | 1.00853900  | -1.74521400 |
| H | 3.38634600 | -0.35893300 | -2.31719900 |
| C | 2.09155300 | 1.69094400  | -3.47211600 |
| H | 1.18490600 | 2.26330300  | -3.68324500 |
| H | 2.95219300 | 2.27253100  | -3.83042300 |
| H | 2.05590100 | 0.76301500  | -4.04877000 |
| C | 2.24460100 | 1.42652600  | -1.99013000 |
| C | 1.69885600 | 2.30960600  | -1.07482200 |
| H | 1.13492100 | 3.16792000  | -1.42850800 |
| H | 2.05159100 | 2.36393500  | -0.05079600 |

**TS10'**

|   |            |             |             |
|---|------------|-------------|-------------|
| C | 5.66691000 | -0.71450500 | 0.39975500  |
| C | 6.31262500 | -1.96284800 | 0.58818100  |
| C | 7.67835300 | -1.99843500 | 0.89649500  |
| C | 8.35529800 | -0.78754500 | 1.00633600  |
| C | 7.69604400 | 0.44450200  | 0.81701200  |
| C | 6.33883700 | 0.50484500  | 0.50976600  |
| C | 4.26284400 | -2.40404100 | 0.15084200  |
| H | 8.18255400 | -2.94823200 | 1.04323700  |
| H | 9.41499900 | -0.78706900 | 1.24305300  |
| H | 8.25991200 | 1.36759400  | 0.91182900  |
| H | 5.83428200 | 1.45477500  | 0.36431000  |
| H | 3.31992400 | -2.89824000 | -0.04351700 |
| N | 4.34655400 | -1.03079200 | 0.12249500  |
| N | 5.40026100 | -2.99927200 | 0.42446700  |
| C | 3.27940400 | -0.09427000 | -0.18898400 |
| H | 3.33130000 | 0.72777900  | 0.52991800  |
| H | 2.32375200 | -0.60489800 | -0.03574100 |
| C | 3.35563900 | 0.42340100  | -1.62838800 |
| H | 3.41725600 | -0.43659100 | -2.30357400 |
| H | 4.28118800 | 0.99694400  | -1.76710300 |
| C | 2.08611000 | 1.58534300  | -3.52284100 |
| H | 1.15700100 | 2.10609900  | -3.76665900 |
| H | 2.13291200 | 0.66772400  | -4.11622300 |
| H | 2.92604200 | 2.22449300  | -3.82359400 |
| C | 2.17893900 | 1.30151900  | -2.03410100 |
| C | 1.66168100 | 2.25747100  | -1.13586800 |
| H | 1.15615900 | 3.13282500  | -1.53511400 |
| H | 2.07438600 | 2.37150900  | -0.13921400 |
| H | 1.10326200 | -0.01301400 | -2.10864300 |

|    |             |             |             |
|----|-------------|-------------|-------------|
| Ni | 0.31068200  | 0.74032600  | -1.13030400 |
| Fe | -3.16767200 | -2.26991500 | 1.08378900  |
| P  | -1.10124600 | -0.92946900 | -1.43233400 |
| P  | -1.03735400 | 1.79698900  | 0.24573700  |
| O  | -2.39969500 | -0.45257700 | -2.10562100 |
| C  | -1.44011000 | -1.46242600 | 0.29015900  |
| C  | -2.08606300 | -0.53019700 | 1.18656500  |
| C  | -2.15101100 | -1.12523700 | 2.48231900  |
| H  | -2.61376500 | -0.68985600 | 3.35641900  |
| C  | -1.57189200 | -2.42529600 | 2.40189000  |
| H  | -1.51419900 | -3.14646800 | 3.20581400  |
| C  | -1.13248900 | -2.63337100 | 1.06072900  |
| H  | -0.68486900 | -3.54334100 | 0.69256300  |
| C  | -2.56206700 | 0.82756100  | 0.76278400  |
| H  | -3.08957400 | 0.70544200  | -0.18677900 |
| C  | -3.45904200 | 1.53453400  | 1.77221400  |
| H  | -2.95605400 | 1.69222900  | 2.72926800  |
| H  | -4.35196800 | 0.92918300  | 1.95717300  |
| H  | -3.78327600 | 2.50691900  | 1.39033400  |
| C  | -4.47271600 | -2.55047200 | -0.49433300 |
| H  | -4.21366400 | -2.22009900 | -1.48971000 |
| C  | -5.07577400 | -1.73456000 | 0.50790400  |
| H  | -5.39668900 | -0.71047600 | 0.37624100  |
| C  | -5.12576900 | -2.48282600 | 1.72389900  |
| H  | -5.49432600 | -2.12643100 | 2.67610200  |
| C  | -4.55234800 | -3.76593900 | 1.47277100  |
| H  | -4.40906600 | -4.55166300 | 2.20182400  |
| C  | -4.14928300 | -3.80718100 | 0.10290700  |
| H  | -3.65241200 | -4.63287600 | -0.38577200 |
| C  | -0.30564100 | 2.35964200  | 1.82002600  |
| C  | 0.81525700  | 1.65667100  | 2.28803800  |
| H  | 1.23150400  | 0.86080400  | 1.68002900  |
| C  | 1.38574400  | 1.96641300  | 3.52211900  |
| H  | 2.25038100  | 1.41057600  | 3.87225000  |
| C  | 0.84501700  | 2.99029400  | 4.30132100  |
| H  | 1.29128600  | 3.23848600  | 5.25959500  |
| C  | -0.27415300 | 3.69214300  | 3.84885500  |
| H  | -0.70198500 | 4.48425600  | 4.45600100  |
| C  | -0.85313600 | 3.37532500  | 2.61992000  |
| H  | -1.73129400 | 3.91639200  | 2.28717000  |
| C  | -1.70236300 | 3.22945700  | -0.67027500 |
| C  | -2.48969500 | 2.92135400  | -1.79551000 |
| H  | -2.69775700 | 1.88065600  | -2.04082300 |
| C  | -2.96030600 | 3.94543400  | -2.61523100 |

|   |             |             |             |
|---|-------------|-------------|-------------|
| H | -3.57087200 | 3.70111300  | -3.47955600 |
| C | -2.63969400 | 5.27691800  | -2.33690400 |
| H | -3.00708100 | 6.07159400  | -2.97944400 |
| C | -1.83412800 | 5.58155200  | -1.23954200 |
| H | -1.56863500 | 6.61311000  | -1.02719900 |
| C | -1.36208400 | 4.56278000  | -0.40901600 |
| H | -0.72312900 | 4.81064500  | 0.43092000  |
| C | -0.42940100 | -2.42499000 | -2.35120200 |
| C | -1.45026600 | -3.57151800 | -2.30257000 |
| H | -1.59149200 | -3.95264400 | -1.28987500 |
| H | -1.10997600 | -4.40185800 | -2.93370900 |
| H | -2.42109600 | -3.23810700 | -2.67761200 |
| C | 0.92563300  | -2.86955600 | -1.78798900 |
| H | 1.66071300  | -2.06367500 | -1.86631900 |
| H | 1.30769600  | -3.72353000 | -2.36032100 |
| H | 0.86602200  | -3.17365200 | -0.73983000 |
| C | -0.25143600 | -1.97586000 | -3.81065800 |
| H | -1.20408500 | -1.65579500 | -4.24028100 |
| H | 0.14283100  | -2.80432600 | -4.41131100 |
| H | 0.45034700  | -1.13788300 | -3.88730100 |

**18'**

|   |            |             |             |
|---|------------|-------------|-------------|
| C | 5.54572700 | -0.77775600 | 0.32778100  |
| C | 6.26634600 | -1.98839400 | 0.48751400  |
| C | 7.58978900 | -1.95292100 | 0.94445800  |
| C | 8.15096300 | -0.71100700 | 1.22613100  |
| C | 7.41876000 | 0.48272400  | 1.06072900  |
| C | 6.10194200 | 0.47250100  | 0.60723100  |
| C | 4.31437900 | -2.53506900 | -0.20460800 |
| H | 8.15049000 | -2.87329000 | 1.07228500  |
| H | 9.17556700 | -0.65551800 | 1.58125400  |
| H | 7.89326700 | 1.43193200  | 1.29076900  |
| H | 5.54175400 | 1.39325700  | 0.47830000  |
| H | 3.43758200 | -3.07864200 | -0.53246600 |
| N | 4.29063900 | -1.16239700 | -0.11605800 |
| N | 5.46184000 | -3.06916900 | 0.14366000  |
| C | 3.18736100 | -0.27733500 | -0.44926600 |
| H | 3.14476600 | 0.50160700  | 0.31507200  |
| H | 2.25721100 | -0.84991300 | -0.37876600 |
| C | 3.31760200 | 0.33619900  | -1.84743100 |
| H | 3.48853000 | -0.47089200 | -2.56883200 |
| H | 4.19422300 | 0.99195800  | -1.88779400 |
| C | 2.12033200 | 1.59491200  | -3.72560200 |
| H | 1.19019900 | 2.10033300  | -3.99899000 |

|    |             |             |             |
|----|-------------|-------------|-------------|
| H  | 2.26761300  | 0.75078000  | -4.40758200 |
| H  | 2.94754900  | 2.29827500  | -3.86775100 |
| C  | 2.07516700  | 1.13697600  | -2.26447700 |
| C  | 1.59817400  | 2.15410800  | -1.29620400 |
| H  | 1.21385600  | 3.07976500  | -1.72455500 |
| H  | 2.18433300  | 2.31708900  | -0.39488000 |
| H  | 1.25110000  | 0.25086100  | -2.34154800 |
| Ni | 0.21459600  | 0.79385900  | -1.19458500 |
| Fe | -3.04467100 | -2.28355500 | 1.21656800  |
| P  | -1.26829600 | -0.86416100 | -1.47569700 |
| P  | -0.97304500 | 1.80681600  | 0.27761700  |
| O  | -2.64649600 | -0.38761500 | -1.98188400 |
| C  | -1.41281100 | -1.48039200 | 0.24705600  |
| C  | -1.92204600 | -0.56858000 | 1.24724100  |
| C  | -1.84324900 | -1.20923200 | 2.52132300  |
| H  | -2.18412900 | -0.79819500 | 3.46067400  |
| C  | -1.30698200 | -2.51601000 | 2.32631700  |
| H  | -1.17014600 | -3.26702700 | 3.09248100  |
| C  | -1.03845800 | -2.68291600 | 0.93437700  |
| H  | -0.66337000 | -3.58796500 | 0.48127300  |
| C  | -2.42825800 | 0.80738200  | 0.92484200  |
| H  | -3.06199300 | 0.71905200  | 0.03833100  |
| C  | -3.19856600 | 1.48652600  | 2.05227900  |
| H  | -2.58854000 | 1.61415500  | 2.94977000  |
| H  | -4.06789400 | 0.87778500  | 2.31925300  |
| H  | -3.55913000 | 2.47078700  | 1.73962400  |
| C  | -4.52420900 | -2.44229000 | -0.21241900 |
| H  | -4.35568600 | -2.04141700 | -1.20184700 |
| C  | -4.99559200 | -1.69140100 | 0.90554200  |
| H  | -5.30683700 | -0.65653200 | 0.88145400  |
| C  | -4.91969900 | -2.52032200 | 2.06679600  |
| H  | -5.17460900 | -2.22788400 | 3.07628500  |
| C  | -4.40172800 | -3.78897900 | 1.66632400  |
| H  | -4.19277000 | -4.62530100 | 2.31926300  |
| C  | -4.15769700 | -3.73988000 | 0.25960500  |
| H  | -3.72952500 | -4.53337500 | -0.33606600 |
| C  | -0.10002900 | 2.34856700  | 1.78407300  |
| C  | 1.01978500  | 1.59998600  | 2.17571800  |
| H  | 1.35481700  | 0.78442000  | 1.54514300  |
| C  | 1.69033000  | 1.89096400  | 3.36273100  |
| H  | 2.55410100  | 1.30067500  | 3.65351400  |
| C  | 1.25128400  | 2.94173700  | 4.16995500  |
| H  | 1.77616200  | 3.17652300  | 5.09103600  |
| C  | 0.13208200  | 3.68710900  | 3.79409400  |

|   |             |             |             |
|---|-------------|-------------|-------------|
| H | -0.21764200 | 4.49949200  | 4.42401900  |
| C | -0.54833000 | 3.38838400  | 2.61326500  |
| H | -1.42612300 | 3.96393200  | 2.34298100  |
| C | -1.72544500 | 3.23949800  | -0.56225400 |
| C | -2.66213700 | 2.94344800  | -1.56971600 |
| H | -2.91914300 | 1.90684000  | -1.78474500 |
| C | -3.21820000 | 3.97563300  | -2.32342900 |
| H | -3.94302800 | 3.74142000  | -3.09750500 |
| C | -2.83832200 | 5.30082000  | -2.09597600 |
| H | -3.27415000 | 6.10148200  | -2.68615800 |
| C | -1.88565000 | 5.59191900  | -1.11899900 |
| H | -1.57391200 | 6.61839000  | -0.94950700 |
| C | -1.32502700 | 4.56602900  | -0.35580200 |
| H | -0.57274200 | 4.80191700  | 0.38816300  |
| C | -0.68538100 | -2.30685100 | -2.53413100 |
| C | -1.69499700 | -3.46079200 | -2.45840300 |
| H | -1.72297700 | -3.91662300 | -1.46684000 |
| H | -1.43055800 | -4.24242600 | -3.18206200 |
| H | -2.70079200 | -3.10461000 | -2.69641600 |
| C | 0.71816600  | -2.77061100 | -2.12487600 |
| H | 1.45256400  | -1.97233000 | -2.26813900 |
| H | 1.03134300  | -3.61733300 | -2.74815700 |
| H | 0.76591200  | -3.09196800 | -1.08135800 |
| C | -0.64346800 | -1.76744100 | -3.97367600 |
| H | -1.63491800 | -1.43935500 | -4.29597600 |
| H | -0.29275500 | -2.54756700 | -4.66028300 |
| H | 0.03645200  | -0.91158800 | -4.06073500 |

**19'**

|   |             |             |             |
|---|-------------|-------------|-------------|
| H | -4.19343100 | -2.96769700 | 0.25460400  |
| C | -6.35617800 | -0.73085700 | -0.63665800 |
| C | -6.99572300 | -1.43741700 | 0.41448000  |
| C | -8.28860400 | -1.07600900 | 0.81294900  |
| C | -8.90733100 | -0.02238500 | 0.14784200  |
| C | -8.26189500 | 0.66415500  | -0.90077900 |
| C | -6.97625200 | 0.32330400  | -1.31335300 |
| C | -5.07476400 | -2.34722000 | 0.16012900  |
| H | -8.78313700 | -1.61205400 | 1.61659500  |
| H | -9.90955700 | 0.27874300  | 0.43735300  |
| H | -8.77972100 | 1.47762400  | -1.39995700 |
| H | -6.48922300 | 0.85101300  | -2.12648500 |
| H | -1.98589800 | -0.29360500 | -0.12797200 |
| N | -5.11494300 | -1.33414500 | -0.77111300 |
| N | -6.16160500 | -2.44296900 | 0.88936900  |

|    |             |             |             |
|----|-------------|-------------|-------------|
| C  | -4.05446900 | -0.96831000 | -1.69970000 |
| H  | -4.44986000 | -1.03642700 | -2.71952600 |
| H  | -3.27431600 | -1.72751700 | -1.60628100 |
| C  | -3.46582300 | 0.43229800  | -1.49286400 |
| H  | -4.26400400 | 1.18008600  | -1.54529800 |
| H  | -2.80544700 | 0.61972000  | -2.34689100 |
| C  | -3.46647700 | 0.64962300  | 1.10543800  |
| H  | -2.82371400 | 0.93829400  | 1.94191700  |
| H  | -3.87344600 | -0.33921000 | 1.31996300  |
| H  | -4.30073500 | 1.35665400  | 1.05362100  |
| C  | -2.66773600 | 0.69791800  | -0.20337500 |
| C  | -1.77798800 | 1.88460200  | -0.30631900 |
| H  | -1.82264000 | 2.59480000  | 0.51796100  |
| H  | -1.71145900 | 2.36623800  | -1.28088700 |
| Ni | -0.50111300 | 0.45224400  | -0.02503700 |
| Fe | 4.06679900  | -1.85799200 | -0.35995600 |
| P  | 0.68788400  | -1.37455000 | 0.51383400  |
| P  | 1.16815900  | 1.78358400  | 0.16223800  |
| O  | 1.20087700  | -1.32353100 | 1.96831700  |
| C  | 2.10305300  | -1.29700400 | -0.65733200 |
| C  | 2.96836000  | -0.14188700 | -0.60090600 |
| C  | 3.92792600  | -0.24373600 | -1.65377200 |
| H  | 4.73398200  | 0.44945400  | -1.84786700 |
| C  | 3.68207200  | -1.45880500 | -2.35752800 |
| H  | 4.26820400  | -1.84674300 | -3.17946500 |
| C  | 2.56328900  | -2.10414700 | -1.75078700 |
| H  | 2.17164500  | -3.06459400 | -2.04678200 |
| C  | 2.82833700  | 0.94102200  | 0.42666600  |
| H  | 2.68069400  | 0.45252100  | 1.39408000  |
| C  | 4.01243100  | 1.89937400  | 0.50460900  |
| H  | 4.18817500  | 2.41227400  | -0.44401400 |
| H  | 4.91787400  | 1.33851400  | 0.75629700  |
| H  | 3.85618300  | 2.65396900  | 1.28082800  |
| C  | 4.12717800  | -2.73202100 | 1.51034700  |
| H  | 3.24286100  | -2.73227600 | 2.13210300  |
| C  | 5.07181400  | -1.66563600 | 1.43011000  |
| H  | 5.05996500  | -0.76747200 | 2.03163600  |
| C  | 5.99780300  | -1.96416400 | 0.38376700  |
| H  | 6.81351400  | -1.33439200 | 0.05582500  |
| C  | 5.62436800  | -3.21849200 | -0.18682300 |
| H  | 6.10758900  | -3.70505900 | -1.02302200 |
| C  | 4.46922400  | -3.69132600 | 0.50883200  |
| H  | 3.92369700  | -4.59782800 | 0.28812600  |
| C  | 1.43141600  | 2.92339000  | -1.23501200 |



|   |             |             |             |
|---|-------------|-------------|-------------|
| C | 0.92245600  | 2.54071800  | -2.48534800 |
| H | 0.34050500  | 1.62757400  | -2.56335000 |
| C | 1.16136400  | 3.32086100  | -3.61592100 |
| H | 0.76538200  | 3.01145900  | -4.57842900 |
| C | 1.90236400  | 4.49877400  | -3.50741500 |
| H | 2.08217400  | 5.11136000  | -4.38574700 |
| C | 2.41453900  | 4.88723200  | -2.26814300 |
| H | 2.99478500  | 5.80078700  | -2.18022100 |
| C | 2.18974800  | 4.10091000  | -1.13830900 |
| H | 2.60471000  | 4.40543100  | -0.18479500 |
| C | 0.91243800  | 2.72281300  | 1.70547800  |
| C | 0.91579700  | 1.96335600  | 2.89022100  |
| H | 1.09774600  | 0.89006400  | 2.84735500  |
| C | 0.64188700  | 2.58019300  | 4.10949900  |
| H | 0.64781600  | 1.98954600  | 5.02079700  |
| C | 0.34890400  | 3.94564200  | 4.16023400  |
| H | 0.13413700  | 4.42145100  | 5.11247500  |
| C | 0.31802100  | 4.69332900  | 2.98287000  |
| H | 0.07527100  | 5.75143300  | 3.01461900  |
| C | 0.59412500  | 4.08560000  | 1.75628800  |
| H | 0.54899100  | 4.67236100  | 0.84581100  |
| C | -0.16837900 | -3.01834600 | 0.19662000  |
| C | 0.77822700  | -4.18797800 | 0.49728800  |
| H | 1.62806100  | -4.21315200 | -0.18787300 |
| H | 0.24383200  | -5.14282400 | 0.41039700  |
| H | 1.16912500  | -4.10907800 | 1.51550100  |
| C | -0.69656900 | -3.07448500 | -1.24238600 |
| H | -1.19740800 | -2.13832900 | -1.51383200 |
| H | -1.42045400 | -3.89158100 | -1.35498100 |
| H | 0.09757400  | -3.23788300 | -1.97322800 |
| C | -1.34703100 | -3.06247300 | 1.18386400  |
| H | -0.99577300 | -2.98887400 | 2.21653900  |
| H | -1.89690900 | -4.00538000 | 1.07333200  |
| H | -2.04632300 | -2.23640100 | 1.01486000  |

**TS11'**

|   |             |             |             |
|---|-------------|-------------|-------------|
| H | -1.27865400 | -1.17213800 | 0.39812700  |
| C | -4.51481100 | -1.58778400 | -0.73341900 |
| C | -4.55151400 | -1.82460700 | 0.66648100  |
| C | -5.66442600 | -2.45564500 | 1.23685500  |
| C | -6.71659200 | -2.81184800 | 0.39748200  |
| C | -6.67278700 | -2.55215200 | -0.98734300 |
| C | -5.57114900 | -1.93513000 | -1.57773500 |
| C | -2.67398900 | -0.82624500 | 0.27158300  |

|    |             |             |             |
|----|-------------|-------------|-------------|
| H  | -5.69775200 | -2.64838200 | 2.30460800  |
| H  | -7.59362300 | -3.29698300 | 0.81559600  |
| H  | -7.51692100 | -2.83818100 | -1.60785700 |
| H  | -5.54110300 | -1.73411200 | -2.64409500 |
| H  | -4.30795000 | 1.13004700  | -0.10425400 |
| N  | -3.28723100 | -0.99225800 | -0.96310600 |
| N  | -3.38772400 | -1.35228000 | 1.25567600  |
| C  | -2.89304100 | -0.21134400 | -2.12387500 |
| H  | -3.17174900 | -0.75141500 | -3.03327600 |
| H  | -1.80073500 | -0.15588600 | -2.09478500 |
| C  | -3.51161500 | 1.19738900  | -2.08814900 |
| H  | -4.51193700 | 1.16086900  | -2.53577400 |
| H  | -2.90669600 | 1.86069900  | -2.72013100 |
| C  | -4.31076300 | 3.16382200  | -0.74517800 |
| H  | -4.45604000 | 3.58191600  | 0.25645900  |
| H  | -5.29281900 | 3.10550700  | -1.23092100 |
| H  | -3.69575100 | 3.87120600  | -1.31553400 |
| C  | -3.63537900 | 1.78504300  | -0.66947600 |
| C  | -2.30784700 | 1.89446500  | 0.08877000  |
| H  | -2.50181700 | 2.11886700  | 1.14525600  |
| H  | -1.75105300 | 2.73922100  | -0.33056600 |
| Ni | -1.09187000 | 0.34443800  | 0.29442000  |
| Fe | 3.67760500  | -1.60035500 | -0.61881600 |
| P  | 0.45947400  | -1.55074600 | 0.79164800  |
| P  | 0.58888500  | 1.77767100  | 0.33387500  |
| O  | 1.04476100  | -1.18281200 | 2.15189500  |
| C  | 1.63945200  | -1.24622200 | -0.55895500 |
| C  | 2.38884300  | -0.01021000 | -0.60601500 |
| C  | 3.14234000  | 0.00158500  | -1.81726500 |
| H  | 3.82832200  | 0.77652300  | -2.12661500 |
| C  | 2.89661500  | -1.22078400 | -2.50798700 |
| H  | 3.36440100  | -1.53360100 | -3.43127700 |
| C  | 1.97504600  | -1.98917800 | -1.74083300 |
| H  | 1.62577900  | -2.97675500 | -1.99742200 |
| C  | 2.31487800  | 1.05093800  | 0.44839700  |
| H  | 2.30285500  | 0.54928100  | 1.41865900  |
| C  | 3.44209900  | 2.07771100  | 0.40175800  |
| H  | 3.47769700  | 2.60866800  | -0.55199900 |
| H  | 4.40325100  | 1.57476900  | 0.54242400  |
| H  | 3.32584600  | 2.81578600  | 1.20027200  |
| C  | 4.24558400  | -2.49905300 | 1.15582900  |
| H  | 3.54607700  | -2.67121700 | 1.95997000  |
| C  | 4.98177800  | -1.29542800 | 0.95350000  |
| H  | 4.95452500  | -0.42650600 | 1.59531100  |

|   |             |             |             |
|---|-------------|-------------|-------------|
| C | 5.71007400  | -1.41977800 | -0.26869000 |
| H | 6.33294200  | -0.65908100 | -0.71874000 |
| C | 5.42398500  | -2.70430700 | -0.82147000 |
| H | 5.79567200  | -3.08815400 | -1.76156200 |
| C | 4.51945200  | -3.37163800 | 0.05877700  |
| H | 4.09450800  | -4.35265800 | -0.09551300 |
| C | 0.70444000  | 2.89349700  | -1.10789700 |
| C | 0.18261700  | 2.43258300  | -2.32556300 |
| H | -0.33470300 | 1.47999400  | -2.35289700 |
| C | 0.31369200  | 3.19152100  | -3.48729400 |
| H | -0.09587700 | 2.82175500  | -4.42243500 |
| C | 0.96247300  | 4.42687600  | -3.44362800 |
| H | 1.05812300  | 5.02381800  | -4.34560500 |
| C | 1.48798500  | 4.89372900  | -2.23768800 |
| H | 1.99626600  | 5.85250000  | -2.19942000 |
| C | 1.36766100  | 4.12962700  | -1.07656500 |
| H | 1.79055000  | 4.49727900  | -0.14904500 |
| C | 0.40537600  | 2.76900700  | 1.85311400  |
| C | 0.60276500  | 2.08314300  | 3.06519800  |
| H | 0.88599900  | 1.03312000  | 3.05424800  |
| C | 0.38724100  | 2.73578900  | 4.27702200  |
| H | 0.54265800  | 2.19984100  | 5.20857700  |
| C | -0.04260300 | 4.06496300  | 4.29502500  |
| H | -0.21345100 | 4.56902100  | 5.24161000  |
| C | -0.26793800 | 4.73790300  | 3.09415100  |
| H | -0.61937600 | 5.76542200  | 3.10191000  |
| C | -0.04949700 | 4.09360600  | 1.87503800  |
| H | -0.24588800 | 4.62082600  | 0.94876200  |
| C | -0.06449700 | -3.35553700 | 0.73616100  |
| C | 1.17402100  | -4.26234400 | 0.77819900  |
| H | 1.78171500  | -4.17601200 | -0.12277300 |
| H | 0.84748100  | -5.30521500 | 0.87005900  |
| H | 1.80281800  | -4.03355700 | 1.64163400  |
| C | -0.91059100 | -3.66319700 | -0.51012000 |
| H | -1.87449100 | -3.15236500 | -0.49191300 |
| H | -1.11538900 | -4.73964400 | -0.54462500 |
| H | -0.40637600 | -3.39582700 | -1.44252600 |
| C | -0.89643500 | -3.58719600 | 2.01158600  |
| H | -0.29492400 | -3.40242900 | 2.90497200  |
| H | -1.23538600 | -4.63009300 | 2.03106000  |
| H | -1.77884600 | -2.94280800 | 2.05282000  |

**15"**

|    |             |            |            |
|----|-------------|------------|------------|
| Ni | -1.31499800 | 0.56510900 | 0.32086100 |
|----|-------------|------------|------------|

|    |             |             |             |
|----|-------------|-------------|-------------|
| Fe | 3.63600000  | -1.68485100 | -0.54637200 |
| P  | 0.60967100  | -1.84353000 | 0.96507900  |
| P  | 0.59729600  | 1.83286300  | 0.34865100  |
| O  | 1.27705200  | -1.60813800 | 2.29615500  |
| C  | 1.61809600  | -1.35787200 | -0.44284700 |
| C  | 2.33445400  | -0.10022000 | -0.45071900 |
| C  | 3.06431600  | -0.03187900 | -1.67374500 |
| H  | 3.72064200  | 0.77291000  | -1.96969600 |
| C  | 2.82842700  | -1.22717500 | -2.41128100 |
| H  | 3.28395900  | -1.49061700 | -3.35567300 |
| C  | 1.93849200  | -2.04599400 | -1.66325700 |
| H  | 1.60161300  | -3.02928800 | -1.95137400 |
| C  | 2.24442100  | 0.95527000  | 0.61272900  |
| H  | 2.13461400  | 0.44642300  | 1.57482300  |
| C  | 3.44934600  | 1.89380300  | 0.65649600  |
| H  | 3.58487300  | 2.42500600  | -0.28823000 |
| H  | 4.35800900  | 1.31751600  | 0.85202900  |
| H  | 3.33747200  | 2.63651700  | 1.44972800  |
| C  | 4.53054400  | -3.49964100 | -0.09128000 |
| H  | 4.14893900  | -4.46185900 | -0.40273600 |
| C  | 4.17981300  | -2.80605200 | 1.10577500  |
| H  | 3.46581300  | -3.12246300 | 1.85128300  |
| C  | 4.86534600  | -1.55584100 | 1.10780700  |
| H  | 4.76691500  | -0.78824100 | 1.86167600  |
| C  | 5.64151900  | -1.47357100 | -0.08812200 |
| H  | 6.24584100  | -0.63236500 | -0.39887600 |
| C  | 5.43331000  | -2.67531800 | -0.83063700 |
| H  | 5.85335400  | -2.90298800 | -1.80064700 |
| C  | 0.86986300  | 2.70069100  | -1.23816800 |
| C  | 0.38293000  | 2.07408500  | -2.39534300 |
| H  | -0.18783400 | 1.15573200  | -2.29708500 |
| C  | 0.62516700  | 2.62226200  | -3.65402400 |
| H  | 0.24343200  | 2.12668800  | -4.54157200 |
| C  | 1.35117500  | 3.80917900  | -3.76872700 |
| H  | 1.53501100  | 4.24211700  | -4.74750700 |
| C  | 1.83725000  | 4.44198400  | -2.62267400 |
| H  | 2.40093000  | 5.36616700  | -2.70870400 |
| C  | 1.60246300  | 3.89029900  | -1.36286200 |
| H  | 1.98271500  | 4.38875500  | -0.47812500 |
| C  | 0.54449100  | 3.11179600  | 1.65204300  |
| C  | 0.93774400  | 2.77059900  | 2.95629000  |
| H  | 1.34562000  | 1.78682000  | 3.16625900  |
| C  | 0.79679700  | 3.68648000  | 3.99751700  |
| H  | 1.10975300  | 3.41068300  | 4.99998200  |

|   |             |             |             |
|---|-------------|-------------|-------------|
| C | 0.25031000  | 4.94815900  | 3.75456100  |
| H | 0.13978600  | 5.65967400  | 4.56722300  |
| C | -0.16061800 | 5.28751300  | 2.46517000  |
| H | -0.59519900 | 6.26339300  | 2.26993800  |
| C | -0.01889700 | 4.37537400  | 1.41896100  |
| H | -0.34882200 | 4.64748500  | 0.42271900  |
| C | -0.14920700 | -3.51281400 | 0.72849400  |
| C | 0.95709500  | -4.57807800 | 0.65894000  |
| H | 1.60956100  | -4.44636100 | -0.20715400 |
| H | 0.49277800  | -5.56791800 | 0.58504400  |
| H | 1.57720900  | -4.56767800 | 1.55967000  |
| C | -1.02915500 | -3.53364900 | -0.53188700 |
| H | -1.79538800 | -2.75714100 | -0.49971200 |
| H | -1.54223900 | -4.49998600 | -0.58859500 |
| H | -0.45252600 | -3.41068400 | -1.45150700 |
| C | -1.02261900 | -3.73916400 | 1.97902600  |
| H | -0.41875600 | -3.72739800 | 2.89013500  |
| H | -1.50886200 | -4.71806500 | 1.89813200  |
| H | -1.80205800 | -2.97538500 | 2.06184100  |
| H | -0.56215300 | -1.01885700 | 0.79409200  |
| C | -4.63824400 | -1.55458800 | -0.63672100 |
| C | -4.43498000 | -1.95519600 | 0.71119300  |
| C | -5.29822200 | -2.89107600 | 1.29354000  |
| C | -6.34812400 | -3.38903000 | 0.52360100  |
| C | -6.54276100 | -2.97228400 | -0.80762100 |
| C | -5.68914800 | -2.04840500 | -1.41137700 |
| C | -2.84814300 | -0.52625900 | 0.26039100  |
| H | -5.14859700 | -3.20872600 | 2.32122900  |
| H | -7.03378700 | -4.11170900 | 0.95688200  |
| H | -7.37504300 | -3.37761700 | -1.37591400 |
| H | -5.84255500 | -1.72925500 | -2.43806500 |
| N | -3.60617900 | -0.67088100 | -0.89796900 |
| N | -3.32488100 | -1.30102900 | 1.23294800  |
| C | -3.44679800 | 0.18857600  | -2.05575000 |
| H | -2.37229100 | 0.30621600  | -2.21934000 |
| H | -3.86230300 | -0.31356800 | -2.93409300 |
| C | -4.09564400 | 1.56129200  | -1.83858700 |
| H | -3.70292300 | 2.24951800  | -2.59993300 |
| H | -5.17700800 | 1.48800900  | -2.00592500 |
| C | -4.41696800 | 3.57279600  | -0.36766500 |
| H | -4.33502400 | 3.98164000  | 0.64491000  |
| H | -3.87240300 | 4.24286300  | -1.04473900 |
| H | -5.47533400 | 3.59617600  | -0.65467000 |
| C | -3.85263200 | 2.14352200  | -0.43428500 |

|   |             |            |             |
|---|-------------|------------|-------------|
| C | -2.38283200 | 2.15167400 | -0.01723300 |
| H | -2.28055000 | 2.62242300 | 0.96896200  |
| H | -1.80050700 | 2.73320000 | -0.74431600 |
| H | -4.41645300 | 1.53633500 | 0.28282300  |

**TS8''**

|    |             |             |             |
|----|-------------|-------------|-------------|
| Ni | -1.30368200 | 0.86771500  | 0.16679800  |
| Fe | 3.32499000  | -2.15584700 | -0.24136700 |
| P  | 0.08316900  | -1.90331400 | 0.67711400  |
| P  | 0.72452400  | 1.76010700  | 0.37684200  |
| O  | 0.53120100  | -1.96211400 | 2.11694600  |
| C  | 1.40516500  | -1.48308100 | -0.47270600 |
| C  | 2.29628600  | -0.37232700 | -0.21621700 |
| C  | 3.26207800  | -0.34798800 | -1.26575500 |
| H  | 4.08361000  | 0.34787800  | -1.34475300 |
| C  | 2.99174600  | -1.42398200 | -2.15897800 |
| H  | 3.57953500  | -1.69286100 | -3.02568800 |
| C  | 1.84982800  | -2.12471000 | -1.67999000 |
| H  | 1.42305800  | -3.00653400 | -2.13131500 |
| C  | 2.14611000  | 0.62407300  | 0.89659500  |
| H  | 1.76322300  | 0.09171300  | 1.77235200  |
| C  | 3.44174800  | 1.35235500  | 1.24955300  |
| H  | 3.83412000  | 1.91672800  | 0.40009400  |
| H  | 4.20390600  | 0.62915600  | 1.55498200  |
| H  | 3.28544800  | 2.05311500  | 2.07249000  |
| C  | 3.78072000  | -4.13181100 | 0.19023800  |
| H  | 3.29841800  | -4.98193500 | -0.27147600 |
| C  | 3.34113500  | -3.45660800 | 1.36845200  |
| H  | 2.45114700  | -3.66685400 | 1.94266000  |
| C  | 4.22584100  | -2.36338200 | 1.60494200  |
| H  | 4.12888800  | -1.63786700 | 2.40002600  |
| C  | 5.21411300  | -2.36088400 | 0.57350700  |
| H  | 6.00622300  | -1.63504300 | 0.45130100  |
| C  | 4.93803000  | -3.45411200 | -0.30246100 |
| H  | 5.48445900  | -3.70079000 | -1.20236600 |
| C  | 1.48201900  | 2.64381100  | -1.04222700 |
| C  | 1.26783500  | 2.11125200  | -2.32261400 |
| H  | 0.62973900  | 1.24139700  | -2.43675800 |
| C  | 1.87086800  | 2.68348300  | -3.44194100 |
| H  | 1.69625700  | 2.25774100  | -4.42557400 |
| C  | 2.69022800  | 3.80419200  | -3.29653200 |
| H  | 3.15347200  | 4.25760400  | -4.16781100 |
| C  | 2.91150000  | 4.34191600  | -2.02706700 |
| H  | 3.55058700  | 5.21193700  | -1.90810000 |

|   |             |             |             |
|---|-------------|-------------|-------------|
| C | 2.31741500  | 3.76248400  | -0.90550000 |
| H | 2.50002300  | 4.18370700  | 0.07675900  |
| C | 0.59938200  | 2.99946600  | 1.71983500  |
| C | 0.75426000  | 2.60064400  | 3.05703300  |
| H | 1.05621800  | 1.58552300  | 3.29384900  |
| C | 0.50664800  | 3.49655500  | 4.09624300  |
| H | 0.63556900  | 3.17244600  | 5.12461200  |
| C | 0.08879900  | 4.79937500  | 3.81847800  |
| H | -0.10555100 | 5.49475600  | 4.62937100  |
| C | -0.08629100 | 5.19966800  | 2.49313500  |
| H | -0.41838400 | 6.20881800  | 2.26715600  |
| C | 0.16171100  | 4.30648300  | 1.45057800  |
| H | 0.01646500  | 4.62961400  | 0.42526900  |
| C | -0.88593500 | -3.36481300 | 0.08640300  |
| C | 0.00584500  | -4.61369500 | 0.01066900  |
| H | 0.79334700  | -4.52195300 | -0.74021000 |
| H | -0.61031300 | -5.48168100 | -0.25096000 |
| H | 0.47857500  | -4.81960300 | 0.97524000  |
| C | -1.53344900 | -3.04091500 | -1.26936300 |
| H | -2.16975100 | -2.15497400 | -1.19881200 |
| H | -2.16997500 | -3.87820900 | -1.57641400 |
| H | -0.79641300 | -2.87298900 | -2.05880500 |
| C | -1.98252900 | -3.57117600 | 1.14887400  |
| H | -1.54826200 | -3.82012600 | 2.12023900  |
| H | -2.63950700 | -4.39115800 | 0.83813300  |
| H | -2.59861400 | -2.67734400 | 1.27176600  |
| H | -0.88055400 | -0.85552200 | 0.42601000  |
| C | -4.70581900 | -1.01666700 | -0.53983900 |
| C | -4.60250800 | -1.00424200 | 0.87828900  |
| C | -5.43819500 | -1.83797300 | 1.63437200  |
| C | -6.34828700 | -2.65027900 | 0.95873000  |
| C | -6.43854500 | -2.64506500 | -0.44555900 |
| C | -5.61363800 | -1.82596000 | -1.22081400 |
| C | -3.07261100 | 0.35841100  | 0.15013900  |
| H | -5.36433600 | -1.84800600 | 2.71747500  |
| H | -7.00272700 | -3.30474900 | 1.52744800  |
| H | -7.15977500 | -3.29183200 | -0.93642300 |
| H | -5.67646300 | -1.82834600 | -2.30484500 |
| N | -3.73679000 | -0.13389700 | -0.97990800 |
| N | -3.61086000 | -0.12889300 | 1.27568400  |
| C | -3.53677900 | 0.27537400  | -2.36079200 |
| H | -3.17212200 | -0.57675500 | -2.94944500 |
| H | -4.51366900 | 0.55983500  | -2.77247700 |
| C | -2.57294900 | 1.45122900  | -2.47348800 |

|   |             |            |             |
|---|-------------|------------|-------------|
| H | -1.55670000 | 1.12050900 | -2.21750700 |
| H | -2.55926000 | 1.77290700 | -3.52136700 |
| C | -2.06752600 | 3.84998300 | -1.88095600 |
| H | -2.34003700 | 4.70518200 | -1.25366300 |
| H | -1.01076100 | 3.62444700 | -1.71013000 |
| H | -2.17778100 | 4.15241700 | -2.92868700 |
| C | -2.93802200 | 2.63175200 | -1.55587100 |
| C | -2.82414700 | 2.25249200 | -0.06510300 |
| H | -3.77126600 | 2.35938700 | 0.46077900  |
| H | -2.11546100 | 2.88356800 | 0.48545700  |
| H | -3.98523200 | 2.89334200 | -1.76376100 |

## 20

|    |             |             |             |
|----|-------------|-------------|-------------|
| Fe | -3.77211200 | -0.19029200 | -0.59641500 |
| P  | -0.97647700 | 1.49459200  | 0.71324400  |
| P  | 0.70543900  | -1.22278800 | 0.27258600  |
| O  | -1.49463900 | 1.01142200  | 2.08415700  |
| C  | -1.87973800 | 0.63277400  | -0.63408100 |
| C  | -1.81993200 | -0.80960200 | -0.67591600 |
| C  | -2.50771300 | -1.25713800 | -1.84470800 |
| H  | -2.66717300 | -2.28621400 | -2.13250700 |
| C  | -3.01318700 | -0.11054300 | -2.52414300 |
| H  | -3.62031100 | -0.11824500 | -3.41907800 |
| C  | -2.62709600 | 1.04792800  | -1.78628100 |
| H  | -2.89989000 | 2.05992000  | -2.04168000 |
| C  | -1.12511700 | -1.63640500 | 0.36374700  |
| H  | -1.40677200 | -1.23705900 | 1.34261100  |
| C  | -1.43508100 | -3.12786400 | 0.29595000  |
| H  | -1.15484900 | -3.55998300 | -0.66761800 |
| H  | -2.50979000 | -3.28260500 | 0.43200600  |
| H  | -0.91005200 | -3.67346000 | 1.08484900  |
| C  | -4.56591000 | 0.29560700  | 1.24796000  |
| H  | -3.95133400 | 0.79971400  | 1.98057500  |
| C  | -4.60614600 | -1.11654300 | 1.04695000  |
| H  | -4.08441300 | -1.85177200 | 1.64353000  |
| C  | -5.39578700 | -1.38190200 | -0.11429300 |
| H  | -5.58523400 | -2.35456900 | -0.54735800 |
| C  | -5.84504200 | -0.13014400 | -0.63403400 |
| H  | -6.43704800 | 0.01167500  | -1.52786300 |
| C  | -5.33204200 | 0.90460500  | 0.20762900  |
| H  | -5.46616300 | 1.96643100  | 0.05833500  |
| C  | 1.27388000  | -2.02275800 | -1.26288400 |
| C  | 1.51632300  | -1.18529800 | -2.36243500 |



|   |             |             |             |
|---|-------------|-------------|-------------|
| H | 1.42494900  | -0.11076500 | -2.23829600 |
| C | 1.87964600  | -1.72427700 | -3.59529200 |
| H | 2.06380600  | -1.06549700 | -4.43838800 |
| C | 2.01474300  | -3.10602200 | -3.74012700 |
| H | 2.30438300  | -3.52686200 | -4.69838300 |
| C | 1.77797800  | -3.94759400 | -2.65141200 |
| H | 1.88063400  | -5.02301900 | -2.76139000 |
| C | 1.40376900  | -3.41190500 | -1.41899200 |
| H | 1.21364800  | -4.07632600 | -0.58389800 |
| C | 1.41158300  | -2.07943600 | 1.72001300  |
| C | 0.87414700  | -1.71172600 | 2.96769900  |
| H | 0.06106500  | -0.99030000 | 3.01517100  |
| C | 1.40500800  | -2.24418000 | 4.14013900  |
| H | 0.98148100  | -1.95871000 | 5.09847300  |
| C | 2.48348200  | -3.13181100 | 4.08516700  |
| H | 2.89737100  | -3.54284500 | 5.00108000  |
| C | 3.03388500  | -3.47928000 | 2.85177900  |
| H | 3.87992200  | -4.15856500 | 2.80395300  |
| C | 2.50299100  | -2.95513500 | 1.67093900  |
| H | 2.94535500  | -3.22522700 | 0.71903800  |
| C | -1.34095800 | 3.33073500  | 0.50272400  |
| C | -2.84910800 | 3.59565300  | 0.60919800  |
| H | -3.40412400 | 3.15360600  | -0.21969500 |
| H | -3.04452600 | 4.67585100  | 0.60819900  |
| H | -3.24485200 | 3.18085900  | 1.54045000  |
| C | -0.77100700 | 3.84068600  | -0.82616800 |
| H | 0.29398600  | 3.60146400  | -0.91543400 |
| H | -0.87407200 | 4.93132700  | -0.89042900 |
| H | -1.27701800 | 3.40875000  | -1.69240900 |
| C | -0.63379100 | 4.03766400  | 1.67105600  |
| H | -0.99336700 | 3.65943900  | 2.63174200  |
| H | -0.82499900 | 5.11687000  | 1.62793900  |
| H | 0.45143300  | 3.89081200  | 1.63790900  |
| H | 4.82596000  | 4.23517900  | -1.43721900 |
| H | 6.69477200  | 1.16053400  | -1.73256200 |
| C | 5.67274700  | 1.50325000  | -1.52479900 |
| H | 5.17454500  | -0.58967000 | -1.86326200 |
| H | 3.20729000  | 0.35337300  | 1.63669500  |
| C | 4.86521500  | 0.25950900  | -1.25309800 |
| H | 5.34300300  | 1.97260600  | -2.46627400 |
| C | 3.89852600  | -0.01741200 | -0.35656700 |
| C | 3.13843700  | 0.76970100  | 0.62732000  |
| H | 3.62421600  | -1.07031400 | -0.32214000 |
| H | 5.66584400  | 2.07127100  | 0.56138500  |

|    |            |            |             |
|----|------------|------------|-------------|
| C  | 5.72650500 | 2.56577000 | -0.41488500 |
| H  | 6.70188100 | 3.06504900 | -0.44499700 |
| C  | 2.84900100 | 2.22312600 | 0.59834300  |
| Ni | 1.16827600 | 0.88105900 | 0.44431100  |
| H  | 3.10806000 | 2.72916300 | 1.53542800  |
| C  | 4.63725500 | 3.63279300 | -0.53926200 |
| C  | 3.22054400 | 3.06319000 | -0.62488900 |
| H  | 3.10389000 | 2.45502100 | -1.52788100 |
| H  | 4.69643100 | 4.32111800 | 0.31438900  |
| H  | 2.51259100 | 3.89420200 | -0.71663000 |
| H  | 1.65727900 | 2.40120500 | 0.68293200  |

## TS12

|    |             |             |             |
|----|-------------|-------------|-------------|
| Fe | -3.75845900 | -0.16389500 | -0.39119500 |
| P  | -0.91935400 | 1.54241500  | 0.75567100  |
| P  | 0.71064500  | -1.25221600 | 0.30410900  |
| O  | -1.42520100 | 1.17133200  | 2.15675700  |
| C  | -1.84142400 | 0.59245000  | -0.51891000 |
| C  | -1.83363800 | -0.85057000 | -0.45141200 |
| C  | -2.55041300 | -1.35727500 | -1.57762900 |
| H  | -2.74239600 | -2.39880600 | -1.79008300 |
| C  | -3.02823900 | -0.24827900 | -2.33297100 |
| H  | -3.64851900 | -0.30084000 | -3.21730100 |
| C  | -2.59314900 | 0.94699200  | -1.68867500 |
| H  | -2.83363700 | 1.94594200  | -2.01636200 |
| C  | -1.10522600 | -1.63465200 | 0.59991600  |
| H  | -1.31339500 | -1.17063200 | 1.56924900  |
| C  | -1.45283400 | -3.11964700 | 0.62536500  |
| H  | -1.22674800 | -3.60531600 | -0.32735400 |
| H  | -2.52313600 | -3.24354200 | 0.81821700  |
| H  | -0.90136400 | -3.64035000 | 1.41198400  |
| C  | -4.52756200 | 0.50030500  | 1.40828000  |
| H  | -3.90074100 | 1.06053600  | 2.08717800  |
| C  | -4.58611500 | -0.92319000 | 1.33940000  |
| H  | -4.07015500 | -1.60571800 | 2.00001700  |
| C  | -5.39167700 | -1.28460000 | 0.21609000  |
| H  | -5.59875300 | -2.29079400 | -0.12195800 |
| C  | -5.83243400 | -0.08077900 | -0.41240800 |
| H  | -6.43453600 | -0.01548900 | -1.30832900 |
| C  | -5.29851300 | 1.02075500  | 0.32450500  |
| H  | -5.42374600 | 2.06592300  | 0.08027100  |
| C  | 0.99997800  | -1.95779200 | -1.35481600 |
| C  | 0.95046700  | -1.06679900 | -2.43805700 |
| H  | 0.81834800  | -0.00668800 | -2.24437200 |

|   |             |             |             |
|---|-------------|-------------|-------------|
| C | 1.06453300  | -1.53742800 | -3.74490000 |
| H | 1.02149800  | -0.83918900 | -4.57527200 |
| C | 1.23884200  | -2.90234400 | -3.98240500 |
| H | 1.33358700  | -3.26949600 | -5.00003900 |
| C | 1.29237100  | -3.79546000 | -2.91052200 |
| H | 1.42707700  | -4.85757300 | -3.09259800 |
| C | 1.16810500  | -3.32812700 | -1.60170700 |
| H | 1.20724000  | -4.02881800 | -0.77484100 |
| C | 1.62127100  | -2.27740700 | 1.51147900  |
| C | 1.16991500  | -2.29376100 | 2.84191500  |
| H | 0.25538300  | -1.77560500 | 3.11317400  |
| C | 1.89670500  | -2.96210700 | 3.82571500  |
| H | 1.53247000  | -2.97087400 | 4.84860900  |
| C | 3.08903300  | -3.61198900 | 3.49938100  |
| H | 3.65471700  | -4.13107600 | 4.26717700  |
| C | 3.55297200  | -3.58567600 | 2.18385900  |
| H | 4.48248100  | -4.08299700 | 1.92281600  |
| C | 2.82652400  | -2.92110000 | 1.19474500  |
| H | 3.20128100  | -2.90549200 | 0.17766800  |
| C | -1.26357300 | 3.35965100  | 0.40625400  |
| C | -2.77211900 | 3.64024900  | 0.48205000  |
| H | -3.33195900 | 3.12130000  | -0.29669300 |
| H | -2.95805100 | 4.71608100  | 0.37223200  |
| H | -3.17191000 | 3.32735200  | 1.45052800  |
| C | -0.68166200 | 3.77272600  | -0.95148800 |
| H | 0.38383400  | 3.52799900  | -1.01403600 |
| H | -0.78363900 | 4.85626900  | -1.09096700 |
| H | -1.18310600 | 3.28345800  | -1.78983200 |
| C | -0.56924600 | 4.15160000  | 1.52649600  |
| H | -0.93794600 | 3.84335500  | 2.50855400  |
| H | -0.76354100 | 5.22347400  | 1.40033300  |
| H | 0.51628900  | 4.00494800  | 1.51371400  |
| H | 4.87740600  | 4.42405600  | -0.84756800 |
| H | 6.57549400  | 1.36861100  | -1.94548700 |
| C | 5.59265500  | 1.74782700  | -1.63354500 |
| H | 4.82676300  | -0.09224400 | -2.50450900 |
| H | 3.35337000  | 0.02888500  | 1.38419500  |
| C | 4.67285100  | 0.55270500  | -1.63816500 |
| H | 5.29772600  | 2.43877100  | -2.43954800 |
| C | 3.76700300  | 0.10227900  | -0.75161400 |
| H | 1.28919400  | 2.32793300  | 0.71331600  |
| C | 3.25813600  | 0.67614600  | 0.51288300  |
| H | 3.35481100  | -0.87427000 | -0.98987400 |
| H | 5.75424800  | 1.82674300  | 0.51983800  |

|    |            |            |             |
|----|------------|------------|-------------|
| C  | 5.76394200 | 2.52791300 | -0.32158100 |
| H  | 6.75581500 | 2.99482100 | -0.31892400 |
| C  | 2.96528100 | 2.03325400 | 0.75673100  |
| Ni | 1.18853300 | 0.89788100 | 0.48505900  |
| H  | 2.97813300 | 2.34337700 | 1.80123500  |
| C  | 4.71800600 | 3.62702300 | -0.10987400 |
| C  | 3.26777100 | 3.14045300 | -0.23192000 |
| H  | 3.07477300 | 2.78440700 | -1.24857200 |
| H  | 4.86506200 | 4.08372600 | 0.87758800  |
| H  | 2.59231300 | 3.98474900 | -0.05947100 |

**21**

|    |             |             |             |
|----|-------------|-------------|-------------|
| Fe | -3.74703900 | -0.21171900 | -0.40230700 |
| P  | -0.94851700 | 1.56012800  | 0.74080500  |
| P  | 0.73561700  | -1.21739700 | 0.30890700  |
| O  | -1.40090600 | 1.15496900  | 2.14724600  |
| C  | -1.84377900 | 0.58180500  | -0.52833600 |
| C  | -1.81027900 | -0.86087900 | -0.45811800 |
| C  | -2.51400700 | -1.38022400 | -1.58636500 |
| H  | -2.68677800 | -2.42517900 | -1.79821800 |
| C  | -3.01140500 | -0.28095900 | -2.34314400 |
| H  | -3.62881100 | -0.34554500 | -3.22862200 |
| C  | -2.60077200 | 0.92246300  | -1.69923700 |
| H  | -2.85987200 | 1.91639200  | -2.02753800 |
| C  | -1.07505400 | -1.63157200 | 0.59713800  |
| H  | -1.29334300 | -1.16936700 | 1.56482000  |
| C  | -1.40223800 | -3.12092400 | 0.62423300  |
| H  | -1.16784600 | -3.60503800 | -0.32708400 |
| H  | -2.47099300 | -3.26021200 | 0.81549100  |
| H  | -0.84445000 | -3.63191100 | 1.41274700  |
| C  | -4.54286900 | 0.42921000  | 1.39366600  |
| H  | -3.94146900 | 1.00830700  | 2.07926500  |
| C  | -4.55909700 | -0.99516500 | 1.32500700  |
| H  | -4.02538700 | -1.66214800 | 1.98721900  |
| C  | -5.34859100 | -1.37950400 | 0.19793700  |
| H  | -5.52266300 | -2.39111600 | -0.14238900 |
| C  | -5.82259100 | -0.18909400 | -0.43188100 |
| H  | -6.42221700 | -0.14141200 | -1.33054600 |
| C  | -5.32512800 | 0.92746200  | 0.30741400  |
| H  | -5.48292600 | 1.96835300  | 0.06444700  |
| C  | 1.03491700  | -1.92221700 | -1.35026500 |
| C  | 1.00206100  | -1.02426200 | -2.42841900 |
| H  | 0.87844100  | 0.03571600  | -2.22731400 |
| C  | 1.12331100  | -1.48670000 | -3.73756900 |

|   |             |             |             |
|---|-------------|-------------|-------------|
| H | 1.09294600  | -0.78255200 | -4.56355500 |
| C | 1.28900800  | -2.85131700 | -3.98293500 |
| H | 1.38944900  | -3.21252200 | -5.00216900 |
| C | 1.32679800  | -3.75171600 | -2.91648000 |
| H | 1.45510700  | -4.81363100 | -3.10445700 |
| C | 1.19471000  | -3.29213200 | -1.60559000 |
| H | 1.22110600  | -3.99923300 | -0.78377400 |
| C | 1.64326500  | -2.24148700 | 1.52119700  |
| C | 1.20267200  | -2.22162900 | 2.85564800  |
| H | 0.30295300  | -1.67567600 | 3.12286000  |
| C | 1.92108700  | -2.88787400 | 3.84671300  |
| H | 1.56499200  | -2.86831100 | 4.87235100  |
| C | 3.09578000  | -3.57142800 | 3.52419400  |
| H | 3.65552500  | -4.08845300 | 4.29772600  |
| C | 3.54972600  | -3.58072200 | 2.20521600  |
| H | 4.46579100  | -4.10383600 | 1.94694500  |
| C | 2.83064800  | -2.91877700 | 1.20853400  |
| H | 3.19802700  | -2.93180900 | 0.18882500  |
| C | -1.38218000 | 3.36318400  | 0.41860400  |
| C | -2.90227600 | 3.56894500  | 0.49828200  |
| H | -3.43656400 | 3.04014500  | -0.29121700 |
| H | -3.13695100 | 4.63685800  | 0.40851300  |
| H | -3.28864900 | 3.22077000  | 1.45984300  |
| C | -0.82473500 | 3.83060500  | -0.93235500 |
| H | 0.25478300  | 3.65733800  | -0.99430300 |
| H | -0.99737900 | 4.90691200  | -1.05535900 |
| H | -1.29072400 | 3.32211500  | -1.77966200 |
| C | -0.72579200 | 4.17170200  | 1.55070200  |
| H | -1.08019300 | 3.83407400  | 2.52814800  |
| H | -0.97173700 | 5.23415600  | 1.43671700  |
| H | 0.36561500  | 4.07749700  | 1.53651700  |
| H | 4.84854700  | 4.40752900  | -0.91041700 |
| H | 6.60656600  | 1.34307800  | -1.92241400 |
| C | 5.61885700  | 1.72264200  | -1.62617600 |
| H | 4.86532100  | -0.13647800 | -2.46417300 |
| H | 3.33554300  | 0.01113500  | 1.41023200  |
| C | 4.70910900  | 0.51956900  | -1.60657800 |
| H | 5.32143300  | 2.38511800  | -2.45473100 |
| C | 3.80880300  | 0.07483900  | -0.71214100 |
| H | 0.95821600  | 2.38025500  | 0.62214000  |
| C | 3.30572600  | 0.66920900  | 0.54320200  |
| H | 3.39836800  | -0.90600400 | -0.93230700 |
| H | 5.78957900  | 1.86807800  | 0.52265100  |
| C | 5.77943300  | 2.54458200  | -0.33861000 |

|    |            |            |             |
|----|------------|------------|-------------|
| H  | 6.76203000 | 3.03044800 | -0.35678700 |
| C  | 3.01465900 | 2.00722200 | 0.76540300  |
| Ni | 1.16942600 | 0.96466900 | 0.47761800  |
| H  | 2.91871100 | 2.32719500 | 1.80152500  |
| C  | 4.71332800 | 3.62868500 | -0.14861500 |
| C  | 3.27116400 | 3.10509100 | -0.23836000 |
| H  | 3.07461100 | 2.73132300 | -1.24828100 |
| H  | 4.86280800 | 4.11575600 | 0.82381800  |
| H  | 2.57671700 | 3.93331900 | -0.06593800 |

### TS13

|    |             |             |             |
|----|-------------|-------------|-------------|
| Ni | 1.27899100  | 0.96316000  | 0.10649800  |
| Fe | -3.73610400 | -0.25897700 | -0.24035300 |
| P  | -0.88660500 | 1.66765400  | 0.41691700  |
| P  | 0.82834500  | -1.18452600 | 0.19805500  |
| O  | -1.00391400 | 1.32634200  | 1.89956700  |
| C  | -1.87037100 | 0.55177700  | -0.63029300 |
| C  | -1.79306200 | -0.88130000 | -0.45786500 |
| C  | -2.60268700 | -1.48597000 | -1.46518700 |
| H  | -2.77647500 | -2.54579500 | -1.57763200 |
| C  | -3.20880800 | -0.45571500 | -2.23952500 |
| H  | -3.91613600 | -0.59484600 | -3.04120600 |
| C  | -2.76324600 | 0.79991000  | -1.72772700 |
| H  | -3.08060100 | 1.76175200  | -2.09170500 |
| C  | -0.97843000 | -1.56702800 | 0.59199900  |
| H  | -1.13647000 | -1.03490800 | 1.53469100  |
| C  | -1.30053900 | -3.04970700 | 0.76104100  |
| H  | -1.12889800 | -3.61097400 | -0.15957800 |
| H  | -2.34872700 | -3.17461500 | 1.04202100  |
| H  | -0.68308800 | -3.49375300 | 1.54848600  |
| C  | -4.41366800 | 0.47950300  | 1.56760900  |
| H  | -3.82033800 | 1.15192300  | 2.17066000  |
| C  | -4.34676000 | -0.94351000 | 1.60846900  |
| H  | -3.71690100 | -1.52505300 | 2.26535800  |
| C  | -5.20580400 | -1.45817100 | 0.58979000  |
| H  | -5.34276000 | -2.50322900 | 0.34155300  |
| C  | -5.80536400 | -0.35310000 | -0.08159700 |
| H  | -6.47806800 | -0.40839300 | -0.92776400 |
| C  | -5.31903300 | 0.84692900  | 0.52297700  |
| H  | -5.56733200 | 1.85489400  | 0.21967000  |
| C  | 1.07698600  | -2.19310700 | -1.31061200 |
| C  | 0.91052800  | -1.52077300 | -2.53169800 |
| H  | 0.73238800  | -0.44959300 | -2.51848700 |
| C  | 0.96370100  | -2.21213400 | -3.74016600 |

|   |             |             |             |
|---|-------------|-------------|-------------|
| H | 0.82993100  | -1.67674100 | -4.67554400 |
| C | 1.19687600  | -3.58939100 | -3.74794500 |
| H | 1.24966600  | -4.12772200 | -4.68811600 |
| C | 1.35626900  | -4.27047200 | -2.53923400 |
| H | 1.52475800  | -5.34391400 | -2.53937700 |
| C | 1.28405300  | -3.58202800 | -1.32885400 |
| H | 1.38133600  | -4.12838600 | -0.39797400 |
| C | 1.70523700  | -1.99763200 | 1.58745300  |
| C | 1.31233500  | -1.61137800 | 2.88483700  |
| H | 0.48724500  | -0.91763100 | 3.01279300  |
| C | 1.99516200  | -2.08595500 | 4.00168000  |
| H | 1.67782800  | -1.78333900 | 4.99322900  |
| C | 3.09632900  | -2.93457100 | 3.84721600  |
| H | 3.63177700  | -3.29761800 | 4.71928400  |
| C | 3.51031700  | -3.29656400 | 2.56438000  |
| H | 4.37403000  | -3.94105800 | 2.43434200  |
| C | 2.82322100  | -2.82900100 | 1.44214200  |
| H | 3.16777900  | -3.11204100 | 0.45550100  |
| C | -1.48257400 | 3.42499200  | 0.11893400  |
| C | -2.96670200 | 3.56950200  | 0.48209100  |
| H | -3.60693700 | 2.98014700  | -0.17608700 |
| H | -3.26450000 | 4.62071500  | 0.39489900  |
| H | -3.14935300 | 3.25205300  | 1.51115500  |
| C | -1.23037700 | 3.87387300  | -1.32787400 |
| H | -0.18088900 | 3.75186900  | -1.61004400 |
| H | -1.47656100 | 4.93630400  | -1.43258500 |
| H | -1.82901000 | 3.32166700  | -2.05518400 |
| C | -0.64156800 | 4.29795700  | 1.06877700  |
| H | -0.79438000 | 4.00422100  | 2.10866600  |
| H | -0.93021100 | 5.35037900  | 0.95452700  |
| H | 0.42831600  | 4.21843500  | 0.84676500  |
| H | 0.54183600  | 2.22639400  | -0.20159600 |
| H | 4.61654300  | 4.30319400  | -1.48786200 |
| H | 6.61425100  | 1.24994200  | -1.70402100 |
| C | 5.58425100  | 1.59169400  | -1.52913300 |
| H | 5.03289200  | -0.47433300 | -1.92940200 |
| H | 3.27335600  | 0.44022600  | 1.73416800  |
| C | 4.77519900  | 0.34538700  | -1.26016400 |
| H | 5.27627700  | 2.02727500  | -2.49314700 |
| C | 3.86586400  | 0.05113400  | -0.31118500 |
| C | 3.22746400  | 0.87366700  | 0.73219100  |
| H | 3.54096100  | -0.99046400 | -0.29554700 |
| H | 5.60618100  | 2.22982600  | 0.53717600  |
| C | 5.61503400  | 2.69455700  | -0.45567400 |

|   |            |            |             |
|---|------------|------------|-------------|
| H | 6.56824500 | 3.23059500 | -0.53469500 |
| C | 2.81178100 | 2.21978800 | 0.62441300  |
| H | 2.67893500 | 2.76498700 | 1.56099300  |
| C | 4.48015100 | 3.71574100 | -0.57165700 |
| C | 3.07988800 | 3.07695900 | -0.58979200 |
| H | 2.97120500 | 2.47253700 | -1.49881000 |
| H | 4.54234700 | 4.42240900 | 0.26853200  |
| H | 2.33079000 | 3.87373300 | -0.65287700 |

## 22

|    |             |             |             |
|----|-------------|-------------|-------------|
| Ni | -1.48761700 | 0.78167000  | -0.55659100 |
| Fe | 3.70212700  | -0.28033500 | 0.52052400  |
| P  | 1.24571200  | 1.65144900  | -0.82199700 |
| P  | -0.84429700 | -1.27070900 | -0.29356600 |
| O  | 1.52957300  | 1.09579600  | -2.19607800 |
| C  | 1.85898700  | 0.62430900  | 0.52115800  |
| C  | 1.71674200  | -0.81777800 | 0.52529800  |
| C  | 2.33839700  | -1.30144100 | 1.71433800  |
| H  | 2.42680400  | -2.33995700 | 1.99605400  |
| C  | 2.88095500  | -0.19758300 | 2.43095400  |
| H  | 3.45564700  | -0.25422100 | 3.34482100  |
| C  | 2.59174700  | 0.98911700  | 1.70393200  |
| H  | 2.90812700  | 1.98195600  | 1.98035500  |
| C  | 0.99869500  | -1.63764300 | -0.50597000 |
| H  | 1.22462300  | -1.20764300 | -1.48624600 |
| C  | 1.38193100  | -3.11568500 | -0.48503700 |
| H  | 1.15310200  | -3.58117700 | 0.47623200  |
| H  | 2.45592200  | -3.22751100 | -0.66326800 |
| H  | 0.84658000  | -3.66621500 | -1.26210200 |
| C  | 4.68109300  | 0.28058700  | -1.21171200 |
| H  | 4.21903000  | 0.92324800  | -1.94605700 |
| C  | 4.54244400  | -1.13787500 | -1.16040400 |
| H  | 3.98871300  | -1.74112700 | -1.86548400 |
| C  | 5.20846800  | -1.60614100 | 0.01315900  |
| H  | 5.25086600  | -2.63096400 | 0.35510900  |
| C  | 5.76044300  | -0.47503900 | 0.68707200  |
| H  | 6.29467700  | -0.49440000 | 1.62696200  |
| C  | 5.43530800  | 0.69116700  | -0.07087800 |
| H  | 5.68719600  | 1.70870400  | 0.19204900  |
| C  | -1.22331100 | -2.01020000 | 1.34135600  |
| C  | -1.43001400 | -1.11987700 | 2.40566400  |
| H  | -1.42113400 | -0.05242900 | 2.20540200  |
| C  | -1.65798700 | -1.59613400 | 3.69678200  |
| H  | -1.81624400 | -0.89492300 | 4.51082500  |



|   |             |             |             |
|---|-------------|-------------|-------------|
| C | -1.69404500 | -2.97050300 | 3.93692200  |
| H | -1.87759700 | -3.34362700 | 4.94029100  |
| C | -1.50322900 | -3.86650000 | 2.88232100  |
| H | -1.53893000 | -4.93677200 | 3.06416700  |
| C | -1.26705400 | -3.39086700 | 1.59255600  |
| H | -1.13138200 | -4.09466800 | 0.77874400  |
| C | -1.64554300 | -2.36427800 | -1.52824000 |
| C | -1.14309600 | -2.39253900 | -2.84002500 |
| H | -0.24153400 | -1.84120300 | -3.08939200 |
| C | -1.80109900 | -3.11211100 | -3.83595900 |
| H | -1.39503600 | -3.12863500 | -4.84318900 |
| C | -2.97985800 | -3.80211400 | -3.54354500 |
| H | -3.49332100 | -4.35970400 | -4.32110300 |
| C | -3.49684000 | -3.76405200 | -2.24823600 |
| H | -4.41668300 | -4.29147600 | -2.01231700 |
| C | -2.83629900 | -3.05030200 | -1.24721200 |
| H | -3.24905600 | -3.03048000 | -0.24441600 |
| C | 1.72243200  | 3.43253400  | -0.59350000 |
| C | 3.24526200  | 3.60821600  | -0.66880700 |
| H | 3.75918700  | 3.09229700  | 0.14470900  |
| H | 3.49342700  | 4.67409100  | -0.60489000 |
| H | 3.64003700  | 3.23011500  | -1.61589700 |
| C | 1.15476000  | 3.97489300  | 0.72734400  |
| H | 0.08234600  | 3.77541500  | 0.81653400  |
| H | 1.29232500  | 5.06167400  | 0.76016700  |
| H | 1.64819800  | 3.55369200  | 1.60483200  |
| C | 1.05055600  | 4.16180700  | -1.77349600 |
| H | 1.41387300  | 3.78564400  | -2.73281400 |
| H | 1.27083600  | 5.23328600  | -1.71179500 |
| H | -0.03788100 | 4.03913000  | -1.75127000 |
| H | -0.16891400 | 1.87554700  | -0.53147000 |
| H | -4.15968000 | 4.78175100  | 1.12384700  |
| H | -6.50255100 | 2.09352300  | 1.92795100  |
| C | -5.46128100 | 2.25635600  | 1.61643600  |
| H | -5.16170000 | 0.18988400  | 2.23409800  |
| H | -3.65355200 | 0.39531800  | -1.64715300 |
| C | -4.86347900 | 0.88054600  | 1.44376600  |
| H | -4.99300200 | 2.75521200  | 2.48085200  |
| C | -4.10196100 | 0.34442000  | 0.47134500  |
| C | -3.45872800 | 0.93693700  | -0.71839300 |
| H | -3.92619800 | -0.72753200 | 0.56108700  |
| H | -5.61172700 | 2.63432900  | -0.50645600 |
| C | -5.45953900 | 3.21180700  | 0.41134000  |
| H | -6.32165300 | 3.88431600  | 0.49770800  |

|   |             |            |             |
|---|-------------|------------|-------------|
| C | -2.85913400 | 2.21282800 | -0.82456400 |
| H | -2.74842000 | 2.61701800 | -1.83327300 |
| C | -4.19469500 | 4.06782800 | 0.28901800  |
| C | -2.89599800 | 3.24469800 | 0.27955800  |
| H | -2.77681400 | 2.75034200 | 1.25089600  |
| H | -4.25160300 | 4.66543000 | -0.63068800 |
| H | -2.04695300 | 3.93090400 | 0.17256400  |

**TS14**

|    |             |             |             |
|----|-------------|-------------|-------------|
| Ni | 1.26296500  | 1.20612000  | 0.23371600  |
| Fe | -3.50523000 | -0.78347700 | -0.24430300 |
| P  | -1.00693200 | 1.54675900  | 0.59792300  |
| P  | 1.15085700  | -0.98546100 | 0.23133300  |
| O  | -1.04939600 | 1.10152100  | 2.05533600  |
| C  | -1.78599500 | 0.34497600  | -0.52230000 |
| C  | -1.48058700 | -1.06410400 | -0.41971900 |
| C  | -2.15059800 | -1.73561200 | -1.48551600 |
| H  | -2.14277400 | -2.80133900 | -1.66058800 |
| C  | -2.89496000 | -0.77331300 | -2.22675300 |
| H  | -3.54903000 | -0.98134600 | -3.06226200 |
| C  | -2.67739900 | 0.50468200  | -1.63701700 |
| H  | -3.14017000 | 1.42310000  | -1.96029700 |
| C  | -0.57200200 | -1.66267800 | 0.60798600  |
| H  | -0.81162900 | -1.20087900 | 1.56896300  |
| C  | -0.66017100 | -3.18171300 | 0.71357800  |
| H  | -0.40699000 | -3.67165000 | -0.22990000 |
| H  | -1.67749300 | -3.48171800 | 0.98559300  |
| H  | 0.01989500  | -3.55617500 | 1.48316800  |
| C  | -4.37632400 | -0.26404500 | 1.56040400  |
| H  | -3.94477400 | 0.46772800  | 2.22645100  |
| C  | -4.05731700 | -1.65346600 | 1.54492300  |
| H  | -3.36213300 | -2.14744600 | 2.20900600  |
| C  | -4.76764400 | -2.25988800 | 0.46438100  |
| H  | -4.70582400 | -3.29718200 | 0.16519800  |
| C  | -5.52681000 | -1.24255800 | -0.18891700 |
| H  | -6.14210400 | -1.37525900 | -1.06812100 |
| C  | -5.28540500 | -0.00897200 | 0.48888300  |
| H  | -5.69567300 | 0.95311700  | 0.21786400  |
| C  | 1.53906800  | -1.89574900 | -1.31221500 |
| C  | 1.24123900  | -1.22669100 | -2.50986000 |
| H  | 0.89036800  | -0.20134100 | -2.46464800 |
| C  | 1.38659500  | -1.86757400 | -3.74002800 |
| H  | 1.14826200  | -1.33551200 | -4.65635700 |
| C  | 1.84159900  | -3.18622200 | -3.79098600 |

|   |             |             |             |
|---|-------------|-------------|-------------|
| H | 1.96527500  | -3.68413300 | -4.74819100 |
| C | 2.12969600  | -3.86585900 | -2.60597700 |
| H | 2.47196300  | -4.89615000 | -2.63827900 |
| C | 1.96843900  | -3.23046400 | -1.37388300 |
| H | 2.17003800  | -3.77993500 | -0.46183300 |
| C | 2.15573700  | -1.69833800 | 1.58788800  |
| C | 1.71431800  | -1.43348100 | 2.89745700  |
| H | 0.78872300  | -0.88693200 | 3.05434000  |
| C | 2.47488200  | -1.83084100 | 3.99477000  |
| H | 2.11701100  | -1.62265300 | 4.99886800  |
| C | 3.69753900  | -2.48121500 | 3.80620700  |
| H | 4.29122500  | -2.78679000 | 4.66258600  |
| C | 4.15637900  | -2.72222500 | 2.51205000  |
| H | 5.11233200  | -3.21341200 | 2.35447800  |
| C | 3.39268800  | -2.33235000 | 1.40907000  |
| H | 3.77207200  | -2.51664200 | 0.41081900  |
| C | -1.89125200 | 3.19366700  | 0.41054900  |
| C | -3.37156500 | 3.05954100  | 0.78813500  |
| H | -3.90664500 | 2.40042400  | 0.10245200  |
| H | -3.85062800 | 4.04575100  | 0.75608600  |
| H | -3.48288700 | 2.66546000  | 1.80128600  |
| C | -1.74239200 | 3.76869700  | -1.00457400 |
| H | -0.69311800 | 3.83358800  | -1.30535100 |
| H | -2.15408200 | 4.78451500  | -1.03147900 |
| H | -2.26655600 | 3.18246900  | -1.76072200 |
| C | -1.19157500 | 4.13347400  | 1.41035700  |
| H | -1.27479100 | 3.75347500  | 2.43129800  |
| H | -1.65353000 | 5.12660200  | 1.36665900  |
| H | -0.12754000 | 4.24740900  | 1.17691400  |
| H | 0.29142000  | 2.33258400  | 0.01164700  |
| H | 2.73376400  | 4.56788500  | -2.12499300 |
| C | 2.28092600  | 3.78249400  | -1.50035100 |
| H | 1.46041800  | 2.29986900  | -2.90138000 |
| H | 4.88578300  | 2.55344400  | -1.26334600 |
| C | 2.30990700  | 2.46704000  | -2.23913200 |
| H | 1.23093300  | 4.06865000  | -1.39528300 |
| C | 3.25750100  | 1.52042600  | -2.20963100 |
| H | 5.29558700  | 0.97885800  | -1.90292800 |
| C | 4.50965200  | 1.53558600  | -1.37904000 |
| H | 3.10032100  | 0.62797700  | -2.81015700 |
| H | 4.00237800  | 3.95037500  | -0.17828200 |
| C | 2.91732000  | 3.83547700  | -0.09519700 |
| H | 2.56630400  | 4.76216700  | 0.37317600  |
| C | 4.31521200  | 0.88129500  | 0.00359600  |

|   |            |             |             |
|---|------------|-------------|-------------|
| H | 5.26690400 | 0.94406900  | 0.55342900  |
| C | 2.59966200 | 2.68288600  | 0.84996000  |
| C | 3.21219400 | 1.42958800  | 0.88514100  |
| H | 4.13708000 | -0.19027000 | -0.14261100 |
| H | 2.12604100 | 2.98827300  | 1.78185100  |
| H | 3.14218800 | 0.90153400  | 1.83572100  |

**23**

|    |             |             |             |
|----|-------------|-------------|-------------|
| Ni | 1.23448100  | 1.20078800  | 0.26965300  |
| Fe | -3.53422200 | -0.65348400 | -0.40396400 |
| P  | -0.91551400 | 1.46601800  | 0.68013900  |
| P  | 1.06435600  | -1.04753800 | 0.28068700  |
| O  | -1.19628400 | 0.93685300  | 2.09570400  |
| C  | -1.75845500 | 0.40632300  | -0.56406100 |
| C  | -1.52585900 | -1.01823700 | -0.53297700 |
| C  | -2.18868500 | -1.60765700 | -1.65162200 |
| H  | -2.22487200 | -2.66256600 | -1.88175600 |
| C  | -2.85902100 | -0.57084700 | -2.36377800 |
| H  | -3.49211800 | -0.70127300 | -3.23090600 |
| C  | -2.59603900 | 0.66417900  | -1.69994900 |
| H  | -3.00089300 | 1.62002800  | -1.99325100 |
| C  | -0.69013200 | -1.69213200 | 0.51086700  |
| H  | -0.97616500 | -1.27286800 | 1.47799800  |
| C  | -0.80697300 | -3.21196000 | 0.53841800  |
| H  | -0.51194400 | -3.66553900 | -0.41096100 |
| H  | -1.84411100 | -3.49869200 | 0.73948400  |
| H  | -0.17976700 | -3.63548500 | 1.32772300  |
| C  | -4.36040900 | -0.19076200 | 1.43100500  |
| H  | -3.84113300 | 0.45298300  | 2.12533100  |
| C  | -4.16523900 | -1.59877800 | 1.31570400  |
| H  | -3.51453200 | -2.19688200 | 1.93813200  |
| C  | -4.92356300 | -2.06493000 | 0.19834100  |
| H  | -4.95297600 | -3.08056100 | -0.17174800 |
| C  | -5.59034900 | -0.94196900 | -0.37831500 |
| H  | -6.21654900 | -0.95840700 | -1.25986500 |
| C  | -5.24302800 | 0.21504200  | 0.38336000  |
| H  | -5.56420600 | 1.22603000  | 0.17889000  |
| C  | 1.58751200  | -1.99503000 | -1.19518500 |
| C  | 1.32735100  | -1.38094100 | -2.43067500 |
| H  | 0.91928100  | -0.37666600 | -2.44344800 |
| C  | 1.57904500  | -2.05186100 | -3.62655500 |
| H  | 1.36880300  | -1.56290900 | -4.57317800 |
| C  | 2.10216700  | -3.34577600 | -3.60381800 |
| H  | 2.30924800  | -3.86693800 | -4.53377000 |

|   |             |             |             |
|---|-------------|-------------|-------------|
| C | 2.34633000  | -3.97321400 | -2.38093600 |
| H | 2.73536000  | -4.98690400 | -2.35717700 |
| C | 2.07862200  | -3.30945700 | -1.18282600 |
| H | 2.23954000  | -3.82428000 | -0.24333900 |
| C | 1.91967200  | -1.68888300 | 1.76489500  |
| C | 1.34437400  | -1.33080300 | 2.99883400  |
| H | 0.42450200  | -0.75067500 | 3.01748000  |
| C | 1.97847200  | -1.66893200 | 4.19248700  |
| H | 1.52210500  | -1.39084800 | 5.13795000  |
| C | 3.19998300  | -2.34762700 | 4.17574300  |
| H | 3.69251900  | -2.60805400 | 5.10785200  |
| C | 3.79280600  | -2.67206500 | 2.95597900  |
| H | 4.75204500  | -3.18105600 | 2.93343200  |
| C | 3.16035800  | -2.34089500 | 1.75532000  |
| H | 3.64805900  | -2.57771500 | 0.81698700  |
| C | -1.66155900 | 3.18716900  | 0.50526200  |
| C | -3.17738300 | 3.12537900  | 0.73729100  |
| H | -3.68447600 | 2.53664200  | -0.02789100 |
| H | -3.59757300 | 4.13885000  | 0.72120900  |
| H | -3.40126400 | 2.68288700  | 1.71113600  |
| C | -1.33915700 | 3.79847200  | -0.86230900 |
| H | -0.26439000 | 3.77701600  | -1.05302800 |
| H | -1.66665300 | 4.84520100  | -0.89158300 |
| H | -1.83278100 | 3.27558200  | -1.68398400 |
| C | -1.02890100 | 4.04422900  | 1.61413100  |
| H | -1.21930200 | 3.61011800  | 2.59921100  |
| H | -1.45487300 | 5.05455300  | 1.58963600  |
| H | 0.05525700  | 4.13092000  | 1.48693800  |
| H | 0.92422800  | 2.60724700  | 0.39825000  |
| H | 3.15249400  | 4.69183600  | -1.76927800 |
| C | 2.61010600  | 3.92854100  | -1.19151000 |
| H | 1.24568300  | 2.91720300  | -2.58864900 |
| H | 4.88428600  | 2.22654200  | -1.72244800 |
| C | 2.21449400  | 2.79730400  | -2.10670600 |
| H | 1.69285400  | 4.41605300  | -0.84956800 |
| C | 2.92199800  | 1.70384100  | -2.41888200 |
| H | 4.81003900  | 0.74116700  | -2.64131800 |
| C | 4.27950500  | 1.33224400  | -1.88624500 |
| H | 2.47930900  | 0.99806100  | -3.11570700 |
| H | 4.50735600  | 3.49228300  | -0.22328000 |
| C | 3.45299400  | 3.57686500  | 0.05408800  |
| H | 3.39540300  | 4.43318500  | 0.73428000  |
| C | 4.22409600  | 0.49013700  | -0.59476200 |
| H | 5.25396700  | 0.32440000  | -0.24346100 |

|   |            |             |             |
|---|------------|-------------|-------------|
| C | 3.06401900 | 2.33601600  | 0.84197800  |
| C | 3.42204000 | 1.03456400  | 0.56717400  |
| H | 3.83849900 | -0.50356100 | -0.84670100 |
| H | 2.73683100 | 2.52403700  | 1.86159000  |
| H | 3.36771500 | 0.35024700  | 1.40893000  |

### TS15

|    |             |             |             |
|----|-------------|-------------|-------------|
| Ni | 1.26577900  | 1.12274100  | 0.30543100  |
| Fe | -3.54244700 | -0.62828900 | -0.43801700 |
| P  | -0.90201500 | 1.43338700  | 0.69586600  |
| P  | 1.04964800  | -1.08507900 | 0.27063900  |
| O  | -1.22867900 | 0.88450600  | 2.09877600  |
| C  | -1.75974700 | 0.41800500  | -0.57638800 |
| C  | -1.53667600 | -1.00876900 | -0.57858200 |
| C  | -2.20680500 | -1.56935800 | -1.70820400 |
| H  | -2.25197300 | -2.61875200 | -1.96126200 |
| C  | -2.86959100 | -0.51178700 | -2.39666900 |
| H  | -3.50413100 | -0.61796800 | -3.26611300 |
| C  | -2.59563000 | 0.70643400  | -1.70582100 |
| H  | -2.99431600 | 1.67146300  | -1.97691600 |
| C  | -0.71385600 | -1.71439800 | 0.45599300  |
| H  | -1.00701600 | -1.31673200 | 1.43031000  |
| C  | -0.84237300 | -3.23372800 | 0.44500500  |
| H  | -0.53868200 | -3.66590000 | -0.51164700 |
| H  | -1.88448500 | -3.51594000 | 0.62565900  |
| H  | -0.22929600 | -3.68253600 | 1.23152200  |
| C  | -4.34358400 | -0.18421600 | 1.41151600  |
| H  | -3.79878700 | 0.43633500  | 2.10778700  |
| C  | -4.17752000 | -1.59369800 | 1.26844900  |
| H  | -3.53282800 | -2.21570600 | 1.87363500  |
| C  | -4.95445600 | -2.02505700 | 0.14982900  |
| H  | -5.00803300 | -3.03336400 | -0.23729600 |
| C  | -5.60363500 | -0.87892800 | -0.40077500 |
| H  | -6.23822800 | -0.86720300 | -1.27641100 |
| C  | -5.22706300 | 0.25701900  | 0.37887700  |
| H  | -5.52918600 | 1.27782500  | 0.19452100  |
| C  | 1.61327900  | -2.00538300 | -1.20372700 |
| C  | 1.40618400  | -1.36358200 | -2.43468400 |
| H  | 1.01366600  | -0.35313200 | -2.44027700 |
| C  | 1.69332300  | -2.01491600 | -3.63335300 |
| H  | 1.52493300  | -1.50573000 | -4.57765200 |
| C  | 2.19808800  | -3.31619200 | -3.61608100 |
| H  | 2.43188500  | -3.82272300 | -4.54777000 |
| C  | 2.39068800  | -3.96999500 | -2.39762500 |

|   |             |             |             |
|---|-------------|-------------|-------------|
| H | 2.76680900  | -4.98862000 | -2.37991700 |
| C | 2.08855500  | -3.32558800 | -1.19733000 |
| H | 2.21110400  | -3.85806000 | -0.26176300 |
| C | 1.87638000  | -1.73116300 | 1.76693400  |
| C | 1.27885100  | -1.38155900 | 2.99238400  |
| H | 0.35933700  | -0.80001900 | 2.99839900  |
| C | 1.89355500  | -1.72775700 | 4.19394800  |
| H | 1.42141900  | -1.45668800 | 5.13370200  |
| C | 3.11568300  | -2.40554400 | 4.19259700  |
| H | 3.59269800  | -2.67229300 | 5.13099100  |
| C | 3.72940300  | -2.72151900 | 2.98080000  |
| H | 4.68897600  | -3.23028000 | 2.97121900  |
| C | 3.11700300  | -2.38262600 | 1.77201800  |
| H | 3.61858400  | -2.61374600 | 0.83955600  |
| C | -1.59596300 | 3.17775400  | 0.54144800  |
| C | -3.11032900 | 3.16229700  | 0.78851300  |
| H | -3.64106200 | 2.59352700  | 0.02355900  |
| H | -3.50199500 | 4.18751900  | 0.78392700  |
| H | -3.33672800 | 2.71764400  | 1.76101200  |
| C | -1.26345700 | 3.78506700  | -0.82498700 |
| H | -0.19915600 | 3.68303900  | -1.04379000 |
| H | -1.51035900 | 4.85422900  | -0.83449300 |
| H | -1.81555400 | 3.31316800  | -1.64006400 |
| C | -0.92240100 | 4.00455300  | 1.64885500  |
| H | -1.10134100 | 3.56059300  | 2.63193700  |
| H | -1.32495900 | 5.02487600  | 1.64885800  |
| H | 0.16057000  | 4.07033700  | 1.49971900  |
| H | 1.27184100  | 2.56779000  | 0.55943100  |
| H | 3.17279100  | 4.74180900  | -1.71440700 |
| C | 2.59437900  | 3.98277300  | -1.16759800 |
| H | 1.25918100  | 2.99573000  | -2.61252600 |
| H | 4.85905100  | 2.30414700  | -1.65475100 |
| C | 2.21581700  | 2.86683300  | -2.10935300 |
| H | 1.67236100  | 4.48667700  | -0.86237800 |
| C | 2.92667700  | 1.77368000  | -2.41138000 |
| H | 4.82804500  | 0.83014600  | -2.59334000 |
| C | 4.26967000  | 1.40461700  | -1.84540800 |
| H | 2.50206100  | 1.07443300  | -3.12614300 |
| H | 4.43942500  | 3.51030400  | -0.10656300 |
| C | 3.37325700  | 3.61161700  | 0.11191000  |
| H | 3.29022600  | 4.46160800  | 0.79733300  |
| C | 4.19202700  | 0.54592300  | -0.56586900 |
| H | 5.21559200  | 0.41888600  | -0.18082900 |
| C | 2.92535600  | 2.36118200  | 0.86723400  |

|   |            |             |             |
|---|------------|-------------|-------------|
| C | 3.31906900 | 1.03895900  | 0.57314800  |
| H | 3.85953700 | -0.45927700 | -0.84664800 |
| H | 2.73464200 | 2.53958900  | 1.92349900  |
| H | 3.36519200 | 0.38541200  | 1.44121300  |

**24**

|    |             |             |             |
|----|-------------|-------------|-------------|
| Fe | -3.60776500 | -0.60858700 | -0.11263000 |
| P  | -0.78891600 | 1.58848600  | 0.28044800  |
| P  | 1.02296700  | -1.03238200 | 0.27136000  |
| O  | -0.90254700 | 1.34155800  | 1.80464500  |
| C  | -1.82774200 | 0.35228400  | -0.61415200 |
| C  | -1.62115200 | -1.04626600 | -0.32028400 |
| C  | -2.38215300 | -1.82483700 | -1.24504000 |
| H  | -2.45940300 | -2.90254800 | -1.25496700 |
| C  | -3.09034300 | -0.92584100 | -2.09493500 |
| H  | -3.79623700 | -1.20225900 | -2.86631900 |
| C  | -2.74963700 | 0.40646600  | -1.71182500 |
| H  | -3.15751300 | 1.29928500  | -2.16106500 |
| C  | -0.71913400 | -1.52130200 | 0.77495100  |
| H  | -0.90600700 | -0.88990500 | 1.64673500  |
| C  | -0.87326100 | -2.99457200 | 1.13840200  |
| H  | -0.69615500 | -3.65202500 | 0.28409100  |
| H  | -1.89170300 | -3.17695500 | 1.49486600  |
| H  | -0.18080600 | -3.27560400 | 1.93683800  |
| C  | -4.27880100 | 0.19807600  | 1.66868300  |
| H  | -3.70220300 | 0.93781000  | 2.20316500  |
| C  | -4.11552800 | -1.21267000 | 1.79434200  |
| H  | -3.42693700 | -1.70727400 | 2.46427500  |
| C  | -4.96752900 | -1.84743300 | 0.83996200  |
| H  | -5.04190000 | -2.91148200 | 0.66163600  |
| C  | -5.66124400 | -0.82563500 | 0.12344500  |
| H  | -6.35768000 | -0.98042400 | -0.68930400 |
| C  | -5.23539400 | 0.43780200  | 0.63527700  |
| H  | -5.55604800 | 1.40566500  | 0.27787100  |
| C  | 1.40726400  | -2.27654700 | -1.00862200 |
| C  | 1.20271800  | -1.87936400 | -2.33946500 |
| H  | 0.91010700  | -0.85454700 | -2.54632800 |
| C  | 1.36743800  | -2.78761100 | -3.38442000 |
| H  | 1.20316000  | -2.46652200 | -4.40862300 |
| C  | 1.74681300  | -4.10306100 | -3.11226400 |
| H  | 1.88368700  | -4.80985200 | -3.92520800 |
| C  | 1.94358000  | -4.50996300 | -1.79156200 |
| H  | 2.22889600  | -5.53496800 | -1.57415100 |
| C  | 1.76516600  | -3.60653800 | -0.74314500 |



|    |             |             |             |
|----|-------------|-------------|-------------|
| H  | 1.89587400  | -3.94374400 | 0.27818700  |
| C  | 1.99200700  | -1.32096000 | 1.79026300  |
| C  | 1.57748900  | -0.57881300 | 2.91181600  |
| H  | 0.71410600  | 0.08107300  | 2.83064100  |
| C  | 2.30041800  | -0.65550000 | 4.10086700  |
| H  | 1.97464100  | -0.08079600 | 4.96295300  |
| C  | 3.44352000  | -1.45516300 | 4.18243100  |
| H  | 4.00526300  | -1.50998900 | 5.11027100  |
| C  | 3.86883600  | -2.17283400 | 3.06450100  |
| H  | 4.76525000  | -2.78381400 | 3.11654500  |
| C  | 3.14936600  | -2.10508900 | 1.86982400  |
| H  | 3.50355200  | -2.64961600 | 1.00258900  |
| C  | -1.61567400 | 3.27059600  | -0.07443900 |
| C  | -3.12126100 | 3.18678100  | 0.21899400  |
| H  | -3.64423800 | 2.51981100  | -0.46461300 |
| H  | -3.56819200 | 4.18569600  | 0.12859300  |
| H  | -3.29525300 | 2.83359100  | 1.23727500  |
| C  | -1.39181700 | 3.72864300  | -1.52315600 |
| H  | -0.34948000 | 3.98672500  | -1.72423800 |
| H  | -1.98864900 | 4.62668300  | -1.72809300 |
| H  | -1.68931700 | 2.96612400  | -2.24890000 |
| C  | -1.02906600 | 4.28582700  | 0.92380600  |
| H  | -1.18791300 | 3.93999700  | 1.94787000  |
| H  | -1.52796700 | 5.25511500  | 0.79971400  |
| H  | 0.04355500  | 4.45535100  | 0.79959200  |
| H  | 3.74199800  | 0.84731400  | 1.40627200  |
| H  | 3.43301000  | 4.44826500  | 0.20094900  |
| C  | 3.16777500  | 3.38570500  | 0.31526300  |
| H  | 1.13120700  | 3.59588200  | -0.39066800 |
| H  | 4.10201900  | 2.69814300  | -2.51712100 |
| C  | 2.05090700  | 3.09579800  | -0.65378100 |
| H  | 2.73988300  | 3.30272300  | 1.32373400  |
| C  | 2.06868100  | 2.49665100  | -1.88594800 |
| H  | 3.05575700  | 1.93037500  | -3.69186300 |
| C  | 3.28457700  | 1.97935300  | -2.62243300 |
| H  | 1.13858500  | 2.53598600  | -2.45082900 |
| H  | 4.97380000  | 2.71460100  | -0.68458700 |
| C  | 4.43211500  | 2.52756600  | 0.24728000  |
| H  | 5.10116800  | 2.85871900  | 1.05094600  |
| C  | 3.70183800  | 0.58834600  | -2.10191600 |
| Ni | 1.40364300  | 1.02032300  | -0.40852500 |
| H  | 4.78617800  | 0.44167500  | -2.24172600 |
| C  | 4.17293600  | 1.02679100  | 0.41259600  |
| C  | 3.29303100  | 0.35310000  | -0.64753200 |

|   |            |             |             |
|---|------------|-------------|-------------|
| H | 3.21256100 | -0.17277800 | -2.71733600 |
| H | 5.15343600 | 0.52146300  | 0.42130800  |
| H | 3.39498600 | -0.72150200 | -0.47485500 |

**25**

|    |             |             |             |
|----|-------------|-------------|-------------|
| Fe | 3.81768900  | 0.27751800  | 0.13810700  |
| P  | 0.83723600  | -1.58472500 | -0.01938000 |
| P  | -0.78375800 | 1.21012500  | 0.09277000  |
| O  | 0.94899000  | -1.63601500 | 1.52016300  |
| C  | 2.04765000  | -0.37748600 | -0.70108500 |
| C  | 1.94099500  | 0.99989800  | -0.28098300 |
| C  | 2.91600000  | 1.76659100  | -0.98855900 |
| H  | 3.10889500  | 2.82199300  | -0.86087200 |
| C  | 3.64149900  | 0.88004200  | -1.83761800 |
| H  | 4.47778900  | 1.14713700  | -2.46926400 |
| C  | 3.11022200  | -0.43303300 | -1.66467400 |
| H  | 3.48864200  | -1.31938200 | -2.14928500 |
| C  | 0.96112500  | 1.46965100  | 0.75167800  |
| H  | 0.98887700  | 0.74932000  | 1.57489800  |
| C  | 1.23159100  | 2.87130100  | 1.28900100  |
| H  | 1.20525300  | 3.62652300  | 0.49979200  |
| H  | 2.22492400  | 2.89969600  | 1.74748900  |
| H  | 0.49884400  | 3.14519300  | 2.05336500  |
| C  | 4.08306100  | -0.84518000 | 1.85154600  |
| H  | 3.31298100  | -1.53479700 | 2.16670800  |
| C  | 4.11068400  | 0.54714000  | 2.16161000  |
| H  | 3.40872000  | 1.06243600  | 2.80228500  |
| C  | 5.18171200  | 1.14842700  | 1.43123100  |
| H  | 5.43990000  | 2.19864800  | 1.42768300  |
| C  | 5.81853200  | 0.12488300  | 0.66592500  |
| H  | 6.64299400  | 0.26391000  | -0.01990400 |
| C  | 5.13926800  | -1.10522200 | 0.92598500  |
| H  | 5.35996600  | -2.05921500 | 0.46878700  |
| C  | -1.10117900 | 2.63689500  | -0.99951900 |
| C  | -1.10003000 | 2.39533100  | -2.38186800 |
| H  | -0.97169100 | 1.37837000  | -2.73863200 |
| C  | -1.25895100 | 3.44491800  | -3.28625600 |
| H  | -1.25226500 | 3.24328100  | -4.35316200 |
| C  | -1.43062900 | 4.74863100  | -2.81896400 |
| H  | -1.56200700 | 5.56610600  | -3.52158400 |
| C  | -1.42914300 | 5.00114400  | -1.44573200 |
| H  | -1.55626900 | 6.01487200  | -1.07774400 |
| C  | -1.25695800 | 3.95504500  | -0.53971100 |
| H  | -1.24110700 | 4.16827600  | 0.52238400  |

|    |             |             |             |
|----|-------------|-------------|-------------|
| C  | -1.79104100 | 1.34322800  | 1.61100900  |
| C  | -1.53390400 | 0.35951400  | 2.58488700  |
| H  | -0.74473900 | -0.37511800 | 2.42064000  |
| C  | -2.31052000 | 0.30807000  | 3.74103600  |
| H  | -2.10700000 | -0.45374700 | 4.48783500  |
| C  | -3.35074600 | 1.22076400  | 3.93463000  |
| H  | -3.95615200 | 1.17421500  | 4.83511000  |
| C  | -3.61615100 | 2.18602700  | 2.96312700  |
| H  | -4.43079100 | 2.89078700  | 3.10233000  |
| C  | -2.84271600 | 2.24668800  | 1.80244500  |
| H  | -3.07875000 | 2.98244100  | 1.04280300  |
| C  | 1.31963000  | -3.26021400 | -0.73396400 |
| C  | 2.73872100  | -3.63902500 | -0.28773300 |
| H  | 3.49246500  | -2.97066000 | -0.70739700 |
| H  | 2.97659800  | -4.66167600 | -0.60788800 |
| H  | 2.81953500  | -3.59688700 | 0.80184600  |
| C  | 1.19389100  | -3.26585000 | -2.26277200 |
| H  | 0.18736000  | -2.97344800 | -2.58118300 |
| H  | 1.38351600  | -4.27410100 | -2.65246300 |
| H  | 1.89979900  | -2.58671700 | -2.74506000 |
| C  | 0.32529100  | -4.27084800 | -0.13931900 |
| H  | 0.34994500  | -4.24827900 | 0.95353100  |
| H  | 0.57351200  | -5.28606000 | -0.47271000 |
| H  | -0.69987100 | -4.05652700 | -0.45787000 |
| H  | -3.62526900 | -0.30181600 | 0.60001300  |
| H  | -6.50350100 | -2.46733600 | 0.29201800  |
| C  | -5.63352300 | -1.84958900 | 0.55923200  |
| H  | -4.39296200 | -2.95800600 | 2.00648800  |
| H  | -4.41993100 | -3.02017300 | -1.79534200 |
| C  | -4.47015200 | -2.73446800 | 0.94327000  |
| H  | -5.93132200 | -1.30616400 | 1.46437600  |
| C  | -3.51898800 | -3.23540000 | 0.14890800  |
| H  | -2.96001500 | -3.98818100 | -1.75879200 |
| C  | -3.42611300 | -3.08595800 | -1.34581800 |
| H  | -2.72230100 | -3.81342800 | 0.61341100  |
| H  | -5.47135400 | -1.25944600 | -1.54389800 |
| C  | -5.37364600 | -0.80844900 | -0.55231000 |
| H  | -6.17134500 | -0.05890800 | -0.49185000 |
| C  | -2.60011800 | -1.87492800 | -1.83008200 |
| Ni | -1.12121700 | -0.74874400 | -0.75357200 |
| H  | -2.41429200 | -1.95294100 | -2.90564000 |
| C  | -3.99443300 | -0.11325700 | -0.41077000 |
| C  | -2.93898900 | -0.47915300 | -1.44548400 |
| H  | -1.50916900 | -2.17727400 | -1.42306800 |

|   |             |            |             |
|---|-------------|------------|-------------|
| H | -4.12805000 | 0.97074800 | -0.47581900 |
| H | -2.94191400 | 0.19608400 | -2.30108100 |

**TS16**

|    |             |             |             |
|----|-------------|-------------|-------------|
| Fe | 3.75047900  | 0.47661300  | 0.15973100  |
| P  | 0.91087000  | -1.58605900 | -0.08051000 |
| P  | -0.88720800 | 1.09647500  | 0.09717100  |
| O  | 0.95403800  | -1.63971100 | 1.45764400  |
| C  | 2.03003300  | -0.27164100 | -0.70964500 |
| C  | 1.83493900  | 1.08327200  | -0.24949000 |
| C  | 2.75859800  | 1.92945900  | -0.93415400 |
| H  | 2.88283100  | 2.99101300  | -0.77561700 |
| C  | 3.54288900  | 1.11476600  | -1.80265600 |
| H  | 4.36199200  | 1.45217300  | -2.42299800 |
| C  | 3.09759600  | -0.23382400 | -1.66790100 |
| H  | 3.53285600  | -1.08052300 | -2.17463700 |
| C  | 0.82467600  | 1.46088300  | 0.79130100  |
| H  | 0.89888500  | 0.72154300  | 1.59400000  |
| C  | 1.00189100  | 2.86293100  | 1.36329600  |
| H  | 0.91246000  | 3.63475800  | 0.59497500  |
| H  | 1.99570000  | 2.95047900  | 1.81362000  |
| H  | 0.25914000  | 3.06439300  | 2.14054100  |
| C  | 4.09599200  | -0.66142500 | 1.84748800  |
| H  | 3.38885900  | -1.42248700 | 2.14407300  |
| C  | 4.00251000  | 0.71922600  | 2.19289200  |
| H  | 3.25335900  | 1.15656500  | 2.83796400  |
| C  | 5.02519500  | 1.42677400  | 1.48955900  |
| H  | 5.19220800  | 2.49504300  | 1.51319700  |
| C  | 5.75417300  | 0.48068400  | 0.70707700  |
| H  | 6.57126200  | 0.70635600  | 0.03558000  |
| C  | 5.18036400  | -0.80849800 | 0.92945100  |
| H  | 5.49017700  | -1.72913700 | 0.45627300  |
| C  | -1.27350800 | 2.55318900  | -0.93667100 |
| C  | -1.16677700 | 2.38733300  | -2.32640600 |
| H  | -0.91678900 | 1.40897500  | -2.72414200 |
| C  | -1.36891600 | 3.46416200  | -3.18940600 |
| H  | -1.28036100 | 3.31943500  | -4.26193400 |
| C  | -1.68773600 | 4.72111400  | -2.67391800 |
| H  | -1.85404700 | 5.55885400  | -3.34454900 |
| C  | -1.78641000 | 4.90077200  | -1.29275200 |
| H  | -2.02454400 | 5.87919300  | -0.88615400 |
| C  | -1.57131900 | 3.82800400  | -0.42784900 |
| H  | -1.63082100 | 3.98724400  | 0.64220300  |
| C  | -1.92053900 | 1.11437500  | 1.60892000  |

|    |             |             |             |
|----|-------------|-------------|-------------|
| C  | -1.59663800 | 0.13286200  | 2.56487600  |
| H  | -0.75841300 | -0.54094000 | 2.38682700  |
| C  | -2.36959800 | 0.00139000  | 3.71711400  |
| H  | -2.11060200 | -0.75732300 | 4.44991300  |
| C  | -3.47789300 | 0.82684400  | 3.92393300  |
| H  | -4.08036000 | 0.71697500  | 4.82087000  |
| C  | -3.81382400 | 1.78621900  | 2.96858300  |
| H  | -4.68141900 | 2.42292200  | 3.11544000  |
| C  | -3.04104700 | 1.92983300  | 1.81445000  |
| H  | -3.33089000 | 2.66085700  | 1.06908000  |
| C  | 1.56363600  | -3.21472500 | -0.76593500 |
| C  | 2.99979600  | -3.44958500 | -0.27469000 |
| H  | 3.69771300  | -2.71298300 | -0.67567700 |
| H  | 3.34327600  | -4.44496900 | -0.58363800 |
| H  | 3.04521300  | -3.39986500 | 0.81637900  |
| C  | 1.48761100  | -3.25856200 | -2.29688400 |
| H  | 0.47092700  | -3.05341400 | -2.64869800 |
| H  | 1.76866500  | -4.25647600 | -2.65600400 |
| H  | 2.15352200  | -2.53654800 | -2.77414700 |
| C  | 0.65763200  | -4.31124500 | -0.18138600 |
| H  | 0.65879400  | -4.28021300 | 0.91133700  |
| H  | 1.01268500  | -5.29818900 | -0.50188500 |
| H  | -0.37609500 | -4.20085900 | -0.52444900 |
| H  | -3.68595400 | 0.06574600  | 0.18700400  |
| H  | -6.13371900 | -2.58221000 | 0.55584500  |
| C  | -5.35378700 | -1.80937800 | 0.61951400  |
| H  | -3.86891700 | -2.34590600 | 2.16170200  |
| H  | -4.13800600 | -3.35314600 | -1.50589300 |
| C  | -4.05275000 | -2.41748500 | 1.09149900  |
| H  | -5.68721600 | -1.12197200 | 1.40622900  |
| C  | -3.09628000 | -2.97961600 | 0.34689500  |
| H  | -2.53779300 | -4.05940500 | -1.40402100 |
| C  | -3.11956200 | -3.16743600 | -1.14874100 |
| H  | -2.18774900 | -3.31343600 | 0.84393300  |
| H  | -5.37910400 | -1.68306000 | -1.57034000 |
| C  | -5.30257700 | -1.01752900 | -0.70607700 |
| H  | -6.19637700 | -0.38381400 | -0.74249200 |
| C  | -2.53691200 | -1.98500100 | -1.91595400 |
| Ni | -1.05358900 | -0.89729200 | -0.85384500 |
| H  | -2.16257800 | -2.23600700 | -2.90745800 |
| C  | -4.04338500 | -0.12675000 | -0.82422900 |
| C  | -2.92488800 | -0.64457000 | -1.72381100 |
| H  | -0.95268300 | -2.26195000 | -1.34238000 |
| H  | -4.32896500 | 0.85044500  | -1.22736900 |

|   |             |            |             |
|---|-------------|------------|-------------|
| H | -2.70542200 | 0.00461800 | -2.56869000 |
|---|-------------|------------|-------------|

**26**

|    |             |             |             |
|----|-------------|-------------|-------------|
| Fe | 3.71613900  | 0.53636800  | 0.16965300  |
| P  | 0.93961300  | -1.60264500 | -0.08105200 |
| P  | -0.92875500 | 1.04547400  | 0.09655400  |
| O  | 0.94061200  | -1.64336200 | 1.45434200  |
| C  | 2.01391500  | -0.25087700 | -0.70356700 |
| C  | 1.78792100  | 1.09726800  | -0.23700100 |
| C  | 2.68956100  | 1.96620900  | -0.92180000 |
| H  | 2.78851900  | 3.02988800  | -0.76007100 |
| C  | 3.49262600  | 1.17310900  | -1.79284000 |
| H  | 4.30309800  | 1.53167300  | -2.41258000 |
| C  | 3.08046500  | -0.18587400 | -1.66195600 |
| H  | 3.53406300  | -1.02010200 | -2.17314500 |
| C  | 0.76959000  | 1.44947900  | 0.80349600  |
| H  | 0.85926800  | 0.71077700  | 1.60460200  |
| C  | 0.91363700  | 2.85457400  | 1.37701900  |
| H  | 0.80647800  | 3.62463300  | 0.60917500  |
| H  | 1.90421800  | 2.96631700  | 1.82929000  |
| H  | 0.16477800  | 3.03751700  | 2.15296900  |
| C  | 4.10207500  | -0.59445400 | 1.85340900  |
| H  | 3.42679400  | -1.38473200 | 2.14690400  |
| C  | 3.95231000  | 0.77944700  | 2.20487900  |
| H  | 3.18355000  | 1.18338100  | 2.84857600  |
| C  | 4.94808100  | 1.53007500  | 1.50799000  |
| H  | 5.07152900  | 2.60410800  | 1.53571800  |
| C  | 5.71700200  | 0.61738800  | 0.72429200  |
| H  | 6.52704000  | 0.87856400  | 0.05712900  |
| C  | 5.19485600  | -0.69457100 | 0.93875100  |
| H  | 5.54560800  | -1.60020200 | 0.46539100  |
| C  | -1.30279400 | 2.48760000  | -0.96470900 |
| C  | -1.13166900 | 2.30384300  | -2.34619000 |
| H  | -0.84349500 | 1.32467200  | -2.71621600 |
| C  | -1.31485200 | 3.36343000  | -3.23427100 |
| H  | -1.17600600 | 3.20446100  | -4.29946800 |
| C  | -1.67901300 | 4.62174100  | -2.75299000 |
| H  | -1.83157400 | 5.44600900  | -3.44332400 |
| C  | -1.83878400 | 4.82035700  | -1.38020000 |
| H  | -2.10973400 | 5.80073500  | -0.99958200 |
| C  | -1.64183600 | 3.76476800  | -0.48982100 |
| H  | -1.74411800 | 3.94059900  | 0.57435400  |
| C  | -1.96995000 | 1.09126600  | 1.60391300  |
| C  | -1.63452300 | 0.13988600  | 2.58597300  |

|    |             |             |             |
|----|-------------|-------------|-------------|
| H  | -0.79262100 | -0.53196700 | 2.42214500  |
| C  | -2.39833800 | 0.03595900  | 3.74684900  |
| H  | -2.12849300 | -0.69882300 | 4.49985000  |
| C  | -3.51222900 | 0.85818700  | 3.93688200  |
| H  | -4.10772200 | 0.77028500  | 4.84083300  |
| C  | -3.86243800 | 1.78518000  | 2.95529800  |
| H  | -4.73472800 | 2.41851600  | 3.08832900  |
| C  | -3.09704500 | 1.90191000  | 1.79283300  |
| H  | -3.39754200 | 2.60946700  | 1.02927600  |
| C  | 1.66823300  | -3.21296700 | -0.73264600 |
| C  | 3.10926100  | -3.38206500 | -0.22889900 |
| H  | 3.77822200  | -2.62012400 | -0.63101800 |
| H  | 3.49406300  | -4.36433100 | -0.52985500 |
| H  | 3.14705100  | -3.32607500 | 0.86202000  |
| C  | 1.60884100  | -3.29186100 | -2.26353500 |
| H  | 0.58356100  | -3.16741600 | -2.62742400 |
| H  | 1.96259200  | -4.27517200 | -2.59699400 |
| H  | 2.22708700  | -2.53562900 | -2.75182600 |
| C  | 0.80372300  | -4.33684900 | -0.13529800 |
| H  | 0.79486300  | -4.28738600 | 0.95656200  |
| H  | 1.20390300  | -5.31211500 | -0.43722200 |
| H  | -0.23122600 | -4.27740500 | -0.48845200 |
| H  | -3.73052100 | 0.18902500  | 0.07212200  |
| H  | -6.03100400 | -2.57081500 | 0.71829300  |
| C  | -5.25239200 | -1.79396700 | 0.69204800  |
| H  | -3.69284400 | -2.29167900 | 2.16688200  |
| H  | -4.09940800 | -3.41324500 | -1.46871500 |
| C  | -3.92358400 | -2.38002000 | 1.10712700  |
| H  | -5.53779300 | -1.07044900 | 1.46524300  |
| C  | -2.99877900 | -2.95318600 | 0.33086900  |
| H  | -2.45916900 | -4.02923300 | -1.42749100 |
| C  | -3.07664700 | -3.16534100 | -1.16211000 |
| H  | -2.07080900 | -3.27717700 | 0.79707200  |
| H  | -5.39000700 | -1.78026400 | -1.49559900 |
| C  | -5.30087800 | -1.07032700 | -0.66894400 |
| H  | -6.22367500 | -0.47871100 | -0.68853500 |
| C  | -2.57679500 | -1.97097600 | -1.96135400 |
| Ni | -1.03535000 | -0.96899300 | -0.85707200 |
| H  | -2.08254500 | -2.21259800 | -2.89947000 |
| C  | -4.10031700 | -0.12599700 | -0.90353400 |
| C  | -2.97638100 | -0.65772600 | -1.78401800 |
| H  | -0.64115400 | -2.30830400 | -1.21515400 |
| H  | -4.45668900 | 0.78799700  | -1.39117000 |
| H  | -2.68808300 | 0.01830800  | -2.58533900 |

27

|    |             |             |             |
|----|-------------|-------------|-------------|
| Fe | -3.65938300 | -0.23369700 | -0.38496500 |
| P  | -0.87754200 | 1.50052600  | 0.85739400  |
| P  | 0.84246100  | -1.23610000 | 0.27004300  |
| O  | -1.36235300 | 1.03839200  | 2.23588000  |
| C  | -1.75935500 | 0.57669100  | -0.46464500 |
| C  | -1.71657900 | -0.86732000 | -0.45869500 |
| C  | -2.41379500 | -1.34200600 | -1.61059500 |
| H  | -2.57663300 | -2.37795600 | -1.86905300 |
| C  | -2.91320000 | -0.21393100 | -2.32211100 |
| H  | -3.52661000 | -0.24339800 | -3.21223600 |
| C  | -2.51151300 | 0.96274700  | -1.62474500 |
| H  | -2.77327100 | 1.96825400  | -1.91325600 |
| C  | -0.96685700 | -1.67740000 | 0.55549000  |
| H  | -1.18468600 | -1.26357000 | 1.54449500  |
| C  | -1.27008100 | -3.17139600 | 0.51006900  |
| H  | -1.01082200 | -3.60751300 | -0.45833800 |
| H  | -2.33902700 | -3.33707200 | 0.67773400  |
| H  | -0.71547400 | -3.70917600 | 1.28273000  |
| C  | -4.45902600 | 0.29894800  | 1.44420300  |
| H  | -3.85423600 | 0.82918100  | 2.16590800  |
| C  | -4.48614800 | -1.11840600 | 1.28417800  |
| H  | -3.95861400 | -1.83110400 | 1.90219300  |
| C  | -5.27281900 | -1.42344200 | 0.13086900  |
| H  | -5.45225100 | -2.40955000 | -0.27517400 |
| C  | -5.73369800 | -0.19121500 | -0.42390200 |
| H  | -6.32662200 | -0.08067600 | -1.32150900 |
| C  | -5.23101200 | 0.87154100  | 0.38788300  |
| H  | -5.37756100 | 1.92713700  | 0.21029000  |
| C  | 1.11063000  | -1.93363400 | -1.39991400 |
| C  | 0.84130000  | -1.08259500 | -2.48379700 |
| H  | 0.56365700  | -0.05132000 | -2.29177400 |
| C  | 0.90778100  | -1.55835400 | -3.79278800 |
| H  | 0.69365100  | -0.88866100 | -4.62017800 |
| C  | 1.24875900  | -2.89003200 | -4.03536700 |
| H  | 1.30835000  | -3.26014600 | -5.05453000 |
| C  | 1.50474300  | -3.74751800 | -2.96391900 |
| H  | 1.75790700  | -4.78763600 | -3.14706100 |
| C  | 1.42661400  | -3.27677800 | -1.65253200 |
| H  | 1.60607400  | -3.95841600 | -0.82891500 |
| C  | 1.76202500  | -2.27901400 | 1.46014300  |
| C  | 1.28390400  | -2.35709500 | 2.77913100  |
| H  | 0.34639500  | -1.88139900 | 3.04841000  |



|    |             |             |             |
|----|-------------|-------------|-------------|
| C  | 2.01303600  | -3.03019800 | 3.75813500  |
| H  | 1.62589900  | -3.08544600 | 4.77114100  |
| C  | 3.23566800  | -3.62521200 | 3.44052100  |
| H  | 3.80250200  | -4.14880800 | 4.20436200  |
| C  | 3.72834500  | -3.53630600 | 2.13834400  |
| H  | 4.68225000  | -3.98868600 | 1.88354000  |
| C  | 3.00018500  | -2.86482300 | 1.15503900  |
| H  | 3.40041000  | -2.79907200 | 0.14964200  |
| C  | -1.29904000 | 3.31495500  | 0.58868500  |
| C  | -2.82009600 | 3.52571500  | 0.63423100  |
| H  | -3.33741800 | 3.02979300  | -0.18689900 |
| H  | -3.04831600 | 4.59739900  | 0.57825800  |
| H  | -3.23248800 | 3.14378400  | 1.57213400  |
| C  | -0.69696200 | 3.81564800  | -0.73057400 |
| H  | 0.38276300  | 3.63252400  | -0.76045200 |
| H  | -0.85682100 | 4.89627300  | -0.83152000 |
| H  | -1.13889000 | 3.33173100  | -1.60496300 |
| C  | -0.67504200 | 4.08635600  | 1.76370000  |
| H  | -1.05518700 | 3.71580300  | 2.71944300  |
| H  | -0.92106400 | 5.15161700  | 1.67847000  |
| H  | 0.41620700  | 3.99461700  | 1.77570500  |
| H  | 2.74552100  | 3.51928600  | -0.24879300 |
| H  | 5.87314600  | 3.03492400  | -2.05085400 |
| C  | 4.85920000  | 3.22693800  | -1.66969300 |
| H  | 3.42018800  | 2.63264500  | -3.22726600 |
| H  | 5.09969800  | 0.43143700  | -0.58571100 |
| C  | 3.88156400  | 2.27013600  | -2.30896300 |
| H  | 4.60463400  | 4.23440500  | -2.02196100 |
| C  | 3.50396400  | 1.06020100  | -1.88345400 |
| H  | 3.86060600  | -0.76670500 | -0.87456900 |
| C  | 4.01331400  | 0.29987800  | -0.68287100 |
| H  | 2.76448000  | 0.53126900  | -2.47643500 |
| H  | 5.48458600  | 2.42098500  | 0.26050200  |
| C  | 4.88962400  | 3.25204300  | -0.12882400 |
| H  | 5.41576800  | 4.16276000  | 0.17828000  |
| C  | 3.36770500  | 0.62761800  | 0.65250300  |
| Ni | 1.24826900  | 0.93785200  | 0.58843300  |
| H  | 3.41378400  | -0.17383200 | 1.38502800  |
| C  | 3.47810100  | 3.22821400  | 0.50665100  |
| C  | 3.10587200  | 1.89413100  | 1.14489500  |
| H  | 1.07253100  | 2.33037000  | 0.91139700  |
| H  | 3.41557000  | 3.98422100  | 1.29570900  |
| H  | 2.92419300  | 1.94194800  | 2.21677900  |

**TS17**

|    |             |             |             |
|----|-------------|-------------|-------------|
| Fe | -3.67842900 | -0.22286100 | -0.37910600 |
| P  | -0.87772800 | 1.50246200  | 0.83718500  |
| P  | 0.82710100  | -1.23819200 | 0.26803800  |
| O  | -1.38217300 | 1.06719300  | 2.22108800  |
| C  | -1.77825600 | 0.58130900  | -0.47366300 |
| C  | -1.73665700 | -0.86257800 | -0.45756000 |
| C  | -2.44124300 | -1.34563400 | -1.60180800 |
| H  | -2.60799300 | -2.38324800 | -1.85124800 |
| C  | -2.94222300 | -0.22217200 | -2.31958100 |
| H  | -3.55995300 | -0.25770500 | -3.20655500 |
| C  | -2.53487800 | 0.95936400  | -1.63299800 |
| H  | -2.79665300 | 1.96325200  | -1.92756100 |
| C  | -0.98444800 | -1.66555200 | 0.56114000  |
| H  | -1.19542000 | -1.24104900 | 1.54746200  |
| C  | -1.29474000 | -3.15853700 | 0.53344500  |
| H  | -1.04705800 | -3.60568600 | -0.43293200 |
| H  | -2.36317300 | -3.31607600 | 0.71141300  |
| H  | -0.73692000 | -3.69136400 | 1.30729300  |
| C  | -4.46120900 | 0.33551300  | 1.45045000  |
| H  | -3.84403600 | 0.86736600  | 2.16065800  |
| C  | -4.50217600 | -1.08313900 | 1.30486900  |
| H  | -3.97807600 | -1.79406800 | 1.92787100  |
| C  | -5.29906100 | -1.39316700 | 0.15996200  |
| H  | -5.49120900 | -2.38190600 | -0.23374300 |
| C  | -5.75202800 | -0.16246500 | -0.40485900 |
| H  | -6.35034700 | -0.05582500 | -1.29935700 |
| C  | -5.23423500 | 0.90401600  | 0.39278100  |
| H  | -5.37067200 | 1.95920300  | 0.20433900  |
| C  | 1.08788200  | -1.90862200 | -1.41115800 |
| C  | 0.86996000  | -1.02382000 | -2.47911400 |
| H  | 0.64404900  | 0.01605500  | -2.26705600 |
| C  | 0.92365900  | -1.47689100 | -3.79668600 |
| H  | 0.74934000  | -0.78182600 | -4.61236300 |
| C  | 1.20142500  | -2.81879400 | -4.06282700 |
| H  | 1.25003400  | -3.17169200 | -5.08864400 |
| C  | 1.40949500  | -3.70831400 | -3.00715400 |
| H  | 1.61581800  | -4.75518900 | -3.20930500 |
| C  | 1.34395300  | -3.25986000 | -1.68737800 |
| H  | 1.48741200  | -3.96431300 | -0.87603800 |
| C  | 1.74584100  | -2.28739900 | 1.45063400  |
| C  | 1.29671300  | -2.31601700 | 2.78199100  |
| H  | 0.38504600  | -1.79652900 | 3.06013600  |
| C  | 2.02274400  | -2.99496600 | 3.75890400  |

|    |             |             |             |
|----|-------------|-------------|-------------|
| H  | 1.65931600  | -3.01165500 | 4.78199300  |
| C  | 3.21331200  | -3.64481700 | 3.42589500  |
| H  | 3.77847300  | -4.17229700 | 4.18831600  |
| C  | 3.67562800  | -3.60689800 | 2.11038500  |
| H  | 4.60365200  | -4.10391400 | 1.84343400  |
| C  | 2.94957300  | -2.93075700 | 1.12837200  |
| H  | 3.32462100  | -2.90799300 | 0.11171900  |
| C  | -1.25844800 | 3.32289700  | 0.54789300  |
| C  | -2.77364500 | 3.56965600  | 0.60455400  |
| H  | -3.30882000 | 3.07638800  | -0.20712500 |
| H  | -2.97997400 | 4.64546300  | 0.53957600  |
| H  | -3.18527400 | 3.20513200  | 1.54982100  |
| C  | -0.65622800 | 3.78899500  | -0.78342400 |
| H  | 0.41922000  | 3.58289500  | -0.81740000 |
| H  | -0.79334800 | 4.87103000  | -0.90296500 |
| H  | -1.11477000 | 3.29921900  | -1.64595800 |
| C  | -0.60373500 | 4.09384600  | 1.70566900  |
| H  | -0.98024900 | 3.74351200  | 2.67048100  |
| H  | -0.82467400 | 5.16393400  | 1.61158900  |
| H  | 0.48510400  | 3.97685700  | 1.70567300  |
| H  | 2.76402900  | 3.42761300  | -0.49332500 |
| H  | 6.06808700  | 2.85212500  | -1.88004300 |
| C  | 5.02091000  | 3.07966300  | -1.63173400 |
| H  | 3.74629600  | 2.35117300  | -3.27443000 |
| H  | 5.13396600  | 0.41056300  | -0.30043400 |
| C  | 4.10665200  | 2.07009700  | -2.28510500 |
| H  | 4.81809700  | 4.05136400  | -2.09924100 |
| C  | 3.67463900  | 0.90378200  | -1.79411100 |
| H  | 3.93826900  | -0.82505500 | -0.60001300 |
| C  | 4.06179800  | 0.25644400  | -0.48691500 |
| H  | 2.99403100  | 0.32425200  | -2.41055600 |
| H  | 5.43036900  | 2.45465100  | 0.41912700  |
| C  | 4.88388400  | 3.24437400  | -0.10412000 |
| H  | 5.37601600  | 4.18208600  | 0.17625400  |
| C  | 3.29301700  | 0.67886300  | 0.75536400  |
| Ni | 1.24844600  | 0.90817600  | 0.58561300  |
| H  | 3.36528600  | -0.03190000 | 1.57642600  |
| C  | 3.41079100  | 3.26421600  | 0.37056700  |
| C  | 2.99201500  | 2.00194300  | 1.12498400  |
| H  | 1.29344400  | 2.31938700  | 0.93050100  |
| H  | 3.24332600  | 4.11190700  | 1.04216300  |
| H  | 2.87066200  | 2.15026000  | 2.19660200  |

|    |             |             |             |
|----|-------------|-------------|-------------|
| Fe | 3.70963700  | -0.31168800 | 0.38322200  |
| P  | 0.96285100  | 1.47978800  | -0.87029700 |
| P  | -0.83947600 | -1.18261000 | -0.26860300 |
| O  | 1.50114400  | 1.04792500  | -2.24891300 |
| C  | 1.83993100  | 0.55986100  | 0.45645800  |
| C  | 1.74290800  | -0.88095500 | 0.46072700  |
| C  | 2.42709700  | -1.37618500 | 1.61291400  |
| H  | 2.55533000  | -2.41577300 | 1.87671500  |
| C  | 2.96494200  | -0.26272500 | 2.31912900  |
| H  | 3.57740800  | -0.30988300 | 3.20926000  |
| C  | 2.60410000  | 0.92392700  | 1.61498600  |
| H  | 2.90228100  | 1.92136800  | 1.89735100  |
| C  | 0.96253900  | -1.67017100 | -0.54844400 |
| H  | 1.18623400  | -1.27078300 | -1.54283100 |
| C  | 1.22259300  | -3.17265100 | -0.49621900 |
| H  | 0.96715300  | -3.59483400 | 0.47933600  |
| H  | 2.28546600  | -3.36472500 | -0.67426000 |
| H  | 0.64742700  | -3.70274600 | -1.25859200 |
| C  | 4.51346500  | 0.21327500  | -1.44671800 |
| H  | 3.91063900  | 0.75699200  | -2.16064400 |
| C  | 4.51597700  | -1.20532000 | -1.29051400 |
| H  | 3.97439800  | -1.90677900 | -1.90939800 |
| C  | 5.30018400  | -1.52874600 | -0.14046000 |
| H  | 5.46566700  | -2.51960100 | 0.26008500  |
| C  | 5.78260300  | -0.30643600 | 0.41860100  |
| H  | 6.37937700  | -0.20946600 | 1.31528600  |
| C  | 5.29574000  | 0.76799000  | -0.38853300 |
| H  | 5.45517600  | 1.82090300  | -0.20443600 |
| C  | -1.09286700 | -1.63331900 | 1.47991500  |
| C  | -0.98109700 | -0.59758200 | 2.42074000  |
| H  | -0.84459600 | 0.42116400  | 2.07142900  |
| C  | -1.03527600 | -0.87439600 | 3.78533300  |
| H  | -0.94374800 | -0.06516000 | 4.50331600  |
| C  | -1.21096700 | -2.18810900 | 4.22484600  |
| H  | -1.25939400 | -2.40409800 | 5.28796500  |
| C  | -1.32227200 | -3.22445600 | 3.29630400  |
| H  | -1.45568600 | -4.24759900 | 3.63483000  |
| C  | -1.25574700 | -2.95196500 | 1.92934300  |
| H  | -1.33169100 | -3.76562500 | 1.21708600  |
| C  | -1.80006600 | -2.32008700 | -1.32558600 |
| C  | -1.43288700 | -2.39642700 | -2.68005400 |
| H  | -0.57133000 | -1.84216700 | -3.04115500 |
| C  | -2.17379300 | -3.17187400 | -3.56931200 |
| H  | -1.87554900 | -3.22566500 | -4.61200300 |

|           |             |             |             |
|-----------|-------------|-------------|-------------|
| C         | -3.29720100 | -3.87235300 | -3.12267500 |
| H         | -3.87505200 | -4.47490300 | -3.81688500 |
| C         | -3.67576400 | -3.79036200 | -1.78306200 |
| H         | -4.55131200 | -4.32693800 | -1.42968400 |
| C         | -2.93361600 | -3.01777900 | -0.88714000 |
| H         | -3.24327700 | -2.96083600 | 0.14997500  |
| C         | 1.34651600  | 3.30069300  | -0.57099600 |
| C         | 2.86062300  | 3.55035700  | -0.62499900 |
| H         | 3.39437000  | 3.05691600  | 0.18815500  |
| H         | 3.06985900  | 4.62618900  | -0.56178000 |
| H         | 3.27224700  | 3.18132700  | -1.56874400 |
| C         | 0.73877200  | 3.75486700  | 0.76215000  |
| H         | -0.33566600 | 3.54050000  | 0.79757200  |
| H         | 0.86519100  | 4.83738300  | 0.89122100  |
| H         | 1.20068600  | 3.26257100  | 1.62137800  |
| C         | 0.69070800  | 4.07531800  | -1.72641400 |
| H         | 1.05796400  | 3.71842600  | -2.69243700 |
| H         | 0.92095700  | 5.14428200  | -1.63940300 |
| H         | -0.39964600 | 3.97276800  | -1.72238400 |
| H         | -2.76986200 | 3.09028300  | 0.83101400  |
| H         | -6.29131100 | 2.68348200  | 1.58432900  |
| C         | -5.20160700 | 2.82625000  | 1.53883200  |
| H         | -4.32230900 | 1.59905400  | 3.14219200  |
| H         | -5.18455500 | 0.61446000  | -0.43277100 |
| C         | -4.49852100 | 1.59693000  | 2.06654800  |
| H         | -4.99019100 | 3.64530300  | 2.23849400  |
| C         | -4.04555700 | 0.54169100  | 1.38128500  |
| H         | -4.21881900 | -0.81934300 | -0.23230400 |
| C         | -4.19891500 | 0.26623600  | -0.09347100 |
| H         | -3.52226800 | -0.22781300 | 1.94232200  |
| H         | -5.30769300 | 2.68453000  | -0.63500600 |
| C         | -4.80878400 | 3.29466500  | 0.12282100  |
| H         | -5.19846200 | 4.30937600  | -0.01292800 |
| C         | -3.12420400 | 0.80442700  | -1.02939000 |
| Ni        | -1.21041200 | 0.89042400  | -0.69461700 |
| H         | -3.19850000 | 0.31963800  | -2.00722400 |
| C         | -3.28226300 | 3.28382400  | -0.11458300 |
| C         | -2.81182500 | 2.25988900  | -1.15893200 |
| H         | -1.63086300 | 2.41927200  | -1.15698800 |
| H         | -2.94522400 | 4.27057700  | -0.44965900 |
| H         | -2.99242400 | 2.61912100  | -2.17808400 |
| <b>29</b> |             |             |             |
| Fe        | 3.87810200  | 0.34819500  | -0.15195400 |

|   |             |             |             |
|---|-------------|-------------|-------------|
| P | 0.97976100  | -1.62786100 | 0.12049800  |
| P | -0.73335800 | 1.11407400  | 0.24281700  |
| O | 1.28133700  | -1.61212000 | 1.63462800  |
| C | 2.05240600  | -0.40691200 | -0.74417900 |
| C | 1.93722200  | 0.98219500  | -0.36376300 |
| C | 2.78609100  | 1.75650400  | -1.21160600 |
| H | 2.94736000  | 2.82297400  | -1.14615800 |
| C | 3.44115700  | 0.86458300  | -2.11109700 |
| H | 4.18353000  | 1.13734800  | -2.84885000 |
| C | 2.99020300  | -0.45983800 | -1.82910700 |
| H | 3.34361100  | -1.34998300 | -2.32589200 |
| C | 1.04828400  | 1.45450300  | 0.74626100  |
| H | 1.18189100  | 0.76142800  | 1.58205300  |
| C | 1.31298300  | 2.88156300  | 1.21397100  |
| H | 1.18128800  | 3.60898200  | 0.40936200  |
| H | 2.34306600  | 2.96113500  | 1.57502500  |
| H | 0.64489300  | 3.15325500  | 2.03639500  |
| C | 4.40658700  | -0.72350200 | 1.53492400  |
| H | 3.71764100  | -1.44579800 | 1.94950700  |
| C | 4.39277500  | 0.67450300  | 1.81925300  |
| H | 3.74487500  | 1.16374800  | 2.53320600  |
| C | 5.33508200  | 1.31684300  | 0.95809700  |
| H | 5.53360900  | 2.37882200  | 0.90957800  |
| C | 5.93213400  | 0.31346100  | 0.13619500  |
| H | 6.66213700  | 0.48223800  | -0.64372100 |
| C | 5.35764900  | -0.94573800 | 0.49253000  |
| H | 5.57255500  | -1.89533800 | 0.02330700  |
| C | -1.20350800 | 2.51913600  | -0.82171900 |
| C | -1.26632600 | 2.28764600  | -2.20414300 |
| H | -1.09438000 | 1.28512300  | -2.58089600 |
| C | -1.54300200 | 3.33154900  | -3.08633400 |
| H | -1.58498900 | 3.13801200  | -4.15392700 |
| C | -1.76825600 | 4.61863100  | -2.59632700 |
| H | -1.99140500 | 5.43096900  | -3.28149800 |
| C | -1.70078000 | 4.86162900  | -1.22303300 |
| H | -1.86764200 | 5.86305600  | -0.83775200 |
| C | -1.41141800 | 3.82203000  | -0.33978900 |
| H | -1.34452200 | 4.02848000  | 0.72179000  |
| C | -1.63815900 | 1.19615100  | 1.82797300  |
| C | -1.23497500 | 0.25802600  | 2.79805600  |
| H | -0.40835500 | -0.42227600 | 2.58982400  |
| C | -1.91086900 | 0.18393600  | 4.01428100  |
| H | -1.59219700 | -0.53979400 | 4.75870400  |
| C | -2.99582800 | 1.02573000  | 4.27318900  |

|    |             |             |             |
|----|-------------|-------------|-------------|
| H  | -3.52134700 | 0.96166100  | 5.22146100  |
| C  | -3.40824200 | 1.94218100  | 3.30611300  |
| H  | -4.25783600 | 2.59154200  | 3.49625100  |
| C  | -2.73522300 | 2.02758100  | 2.08564900  |
| H  | -3.07897200 | 2.73124200  | 1.33699300  |
| C  | 1.43023000  | -3.31281200 | -0.58986300 |
| C  | 2.90425000  | -3.63767100 | -0.30830200 |
| H  | 3.58302900  | -2.95845600 | -0.82770400 |
| H  | 3.13580200  | -4.66063800 | -0.63215200 |
| H  | 3.11227800  | -3.56693100 | 0.76289500  |
| C  | 1.11871400  | -3.37513200 | -2.09085200 |
| H  | 0.07769200  | -3.09930200 | -2.29405300 |
| H  | 1.26926500  | -4.39540300 | -2.46552900 |
| H  | 1.75272900  | -2.70931900 | -2.67992300 |
| C  | 0.54836800  | -4.32794700 | 0.15728300  |
| H  | 0.70966800  | -4.26511700 | 1.23691800  |
| H  | 0.78537900  | -5.34740600 | -0.17124400 |
| H  | -0.51691300 | -4.15726800 | -0.03429700 |
| H  | -6.10088100 | 0.39619400  | -0.57819000 |
| H  | -6.46781300 | -3.30696700 | -0.40438600 |
| C  | -5.85377000 | -2.42197100 | -0.17928800 |
| H  | -4.78098500 | -3.49763900 | 1.37550200  |
| H  | -2.85226900 | -2.65949000 | -2.02872800 |
| C  | -4.58995700 | -2.92902900 | 0.46445200  |
| H  | -6.42630500 | -1.87812000 | 0.58762100  |
| C  | -3.30353100 | -2.83342700 | 0.10803900  |
| H  | -1.53571500 | -2.39052500 | -0.98827500 |
| C  | -2.69186800 | -2.13071600 | -1.08128400 |
| H  | -2.58348700 | -3.31807600 | 0.76394700  |
| H  | -5.08980300 | -2.02239300 | -2.16744200 |
| C  | -5.75960000 | -1.55269200 | -1.43928500 |
| H  | -6.74884400 | -1.53834000 | -1.91258700 |
| C  | -2.84946500 | -0.64447900 | -1.20878300 |
| Ni | -1.05633000 | -0.87292200 | -0.50380900 |
| H  | -2.73583900 | -0.30597500 | -2.24399800 |
| C  | -5.33266900 | -0.10115800 | -1.18648700 |
| C  | -3.96717900 | 0.07141500  | -0.49259200 |
| H  | -4.02796100 | -0.26387600 | 0.54602900  |
| H  | -5.30876500 | 0.42712900  | -2.14909900 |
| H  | -3.74230300 | 1.14299100  | -0.45996400 |

### TS18

|    |             |             |             |
|----|-------------|-------------|-------------|
| Fe | -3.84812700 | -0.37436300 | -0.14605300 |
| P  | -0.97297900 | 1.63876100  | 0.12534100  |

|   |             |             |             |
|---|-------------|-------------|-------------|
| P | 0.75407500  | -1.09629500 | 0.24684700  |
| O | -1.21709800 | 1.58069300  | 1.64387900  |
| C | -2.02573700 | 0.39927500  | -0.73391400 |
| C | -1.90468300 | -0.99010700 | -0.35594500 |
| C | -2.74348900 | -1.76532600 | -1.21221300 |
| H | -2.89822000 | -2.83293500 | -1.15114300 |
| C | -3.40299800 | -0.87390200 | -2.10874100 |
| H | -4.14155900 | -1.14816400 | -2.84968600 |
| C | -2.96251500 | 0.45185800  | -1.81997300 |
| H | -3.31917700 | 1.34128100  | -2.31542600 |
| C | -1.01910000 | -1.46414300 | 0.75572700  |
| H | -1.16088900 | -0.77875300 | 1.59608100  |
| C | -1.27450900 | -2.89714200 | 1.20874600  |
| H | -1.13463800 | -3.61580300 | 0.39762700  |
| H | -2.30458900 | -2.99030400 | 1.56682900  |
| H | -0.60533500 | -3.17094400 | 2.02958600  |
| C | -4.39387900 | 0.64813600  | 1.56673700  |
| H | -3.72269100 | 1.36993700  | 2.00949800  |
| C | -4.36324600 | -0.75593800 | 1.81523000  |
| H | -3.71039900 | -1.25572000 | 2.51716700  |
| C | -5.29587500 | -1.38679200 | 0.93539200  |
| H | -5.47909500 | -2.44972500 | 0.85711900  |
| C | -5.90429900 | -0.36982200 | 0.13923500  |
| H | -6.63079800 | -0.52716500 | -0.64628000 |
| C | -5.34668400 | 0.88637800  | 0.52942900  |
| H | -5.57817000 | 1.84576200  | 0.08951900  |
| C | 1.20396700  | -2.48512700 | -0.85044600 |
| C | 1.21830100  | -2.22262300 | -2.22927800 |
| H | 1.02182300  | -1.21379600 | -2.57702500 |
| C | 1.47243400  | -3.24323400 | -3.14504500 |
| H | 1.47661300  | -3.02462900 | -4.20865000 |
| C | 1.72273700  | -4.53964800 | -2.69330900 |
| H | 1.92822400  | -5.33427700 | -3.40430200 |
| C | 1.70082200  | -4.81486100 | -1.32463700 |
| H | 1.88461700  | -5.82426300 | -0.96881900 |
| C | 1.43411900  | -3.79809700 | -0.40808400 |
| H | 1.39877500  | -4.03179200 | 0.64918700  |
| C | 1.66503100  | -1.21883800 | 1.82883000  |
| C | 1.28022900  | -0.28185400 | 2.80727900  |
| H | 0.46611200  | 0.41417200  | 2.60335700  |
| C | 1.95460200  | -0.23172200 | 4.02584900  |
| H | 1.64914400  | 0.49222600  | 4.77561700  |
| C | 3.02167600  | -1.09722700 | 4.27974500  |
| H | 3.54678900  | -1.05194600 | 5.22934300  |



|    |             |             |             |
|----|-------------|-------------|-------------|
| C  | 3.41677600  | -2.01343900 | 3.30515800  |
| H  | 4.25257700  | -2.68178500 | 3.49089900  |
| C  | 2.74404400  | -2.07476300 | 2.08309800  |
| H  | 3.07684000  | -2.77853000 | 1.32947700  |
| C  | -1.50419400 | 3.32525500  | -0.52232700 |
| C  | -2.98874300 | 3.56282900  | -0.20975100 |
| H  | -3.63933200 | 2.87986900  | -0.75812200 |
| H  | -3.27002000 | 4.58855900  | -0.47996700 |
| H  | -3.18089700 | 3.42999500  | 0.85806800  |
| C  | -1.22206400 | 3.46582500  | -2.02299700 |
| H  | -0.16759400 | 3.27216500  | -2.24644000 |
| H  | -1.45013300 | 4.48721700  | -2.35249400 |
| H  | -1.81842400 | 2.78150800  | -2.63010200 |
| C  | -0.66620500 | 4.35582100  | 0.25174900  |
| H  | -0.81826500 | 4.25478200  | 1.32954000  |
| H  | -0.95183700 | 5.37143600  | -0.04808300 |
| H  | 0.40341500  | 4.23603400  | 0.04800400  |
| H  | 6.04542300  | -0.46995900 | -0.39897500 |
| H  | 6.54375000  | 3.19004900  | -0.27545200 |
| C  | 5.82574500  | 2.37411400  | -0.10910000 |
| H  | 4.69750400  | 3.75805800  | 1.12309200  |
| H  | 2.47280200  | 2.61073200  | -2.12883400 |
| C  | 4.54227500  | 3.03729000  | 0.31893800  |
| H  | 6.23193900  | 1.82416700  | 0.75418200  |
| C  | 3.27962200  | 2.94979900  | -0.12255900 |
| H  | 1.12241700  | 2.37577100  | -0.82982900 |
| C  | 2.70008300  | 2.08698100  | -1.19923600 |
| H  | 2.56379500  | 3.61629500  | 0.35344800  |
| H  | 5.23231500  | 1.91986400  | -2.13836900 |
| C  | 5.82781300  | 1.46048600  | -1.34130400 |
| H  | 6.85363200  | 1.40397100  | -1.72435700 |
| C  | 2.91562900  | 0.68920100  | -1.28927100 |
| Ni | 1.05147600  | 0.95510500  | -0.50377200 |
| H  | 2.73403400  | 0.25003400  | -2.27113600 |
| C  | 5.33800500  | 0.03418500  | -1.07110200 |
| C  | 3.93119600  | -0.04482700 | -0.45140700 |
| H  | 3.94638100  | 0.35609200  | 0.56557200  |
| H  | 5.34720300  | -0.52995200 | -2.01318700 |
| H  | 3.65492900  | -1.09959800 | -0.37036900 |

### 30

|    |             |             |             |
|----|-------------|-------------|-------------|
| Fe | -3.87723500 | -0.15116400 | -0.12498000 |
| P  | -0.83384600 | 1.59864000  | 0.24775700  |
| P  | 0.65341100  | -1.22269500 | 0.11660100  |

|   |             |             |             |
|---|-------------|-------------|-------------|
| O | -0.94430600 | 1.30902600  | 1.75278400  |
| C | -2.01581600 | 0.55935800  | -0.68836400 |
| C | -1.99589700 | -0.87238000 | -0.49455900 |
| C | -2.91931900 | -1.45924100 | -1.41163500 |
| H | -3.15742400 | -2.51055200 | -1.48505600 |
| C | -3.53561400 | -0.40905200 | -2.15370300 |
| H | -4.31711200 | -0.52659100 | -2.89195600 |
| C | -2.98273500 | 0.82897300  | -1.71256000 |
| H | -3.28248500 | 1.80242000  | -2.06682700 |
| C | -1.14615700 | -1.56302200 | 0.53237900  |
| H | -1.26074400 | -1.01056700 | 1.46850300  |
| C | -1.49480800 | -3.03119700 | 0.75162400  |
| H | -1.37811300 | -3.62106300 | -0.16069200 |
| H | -2.53685200 | -3.11690800 | 1.07566700  |
| H | -0.86208900 | -3.47034600 | 1.52807200  |
| C | -4.30918100 | 0.64780900  | 1.73312900  |
| H | -3.59281800 | 1.26254400  | 2.25786600  |
| C | -4.35902700 | -0.77655300 | 1.78121900  |
| H | -3.71724900 | -1.40909200 | 2.37832500  |
| C | -5.35317200 | -1.21997700 | 0.85588100  |
| H | -5.60295000 | -2.24841000 | 0.63376000  |
| C | -5.91963000 | -0.06633800 | 0.23411100  |
| H | -6.67582700 | -0.06795400 | -0.53888700 |
| C | -5.27488800 | 1.08703700  | 0.77654500  |
| H | -5.46277400 | 2.11138000  | 0.48828000  |
| C | 1.05214000  | -2.41035100 | -1.21614900 |
| C | 1.18067100  | -1.88263400 | -2.51051600 |
| H | 1.08548500  | -0.80993500 | -2.65327800 |
| C | 1.41815100  | -2.72010600 | -3.60044700 |
| H | 1.51192000  | -2.29764400 | -4.59632800 |
| C | 1.53627200  | -4.09718100 | -3.40746100 |
| H | 1.72649800  | -4.75119000 | -4.25323100 |
| C | 1.40687400  | -4.63418400 | -2.12464200 |
| H | 1.49376000  | -5.70583200 | -1.97169600 |
| C | 1.16065900  | -3.79888300 | -1.03543500 |
| H | 1.05423200  | -4.22849200 | -0.04620800 |
| C | 1.53290000  | -1.73784100 | 1.63231200  |
| C | 1.16873900  | -1.06596200 | 2.81446500  |
| H | 0.37061500  | -0.32620300 | 2.78896300  |
| C | 1.87020300  | -1.30240900 | 3.99490600  |
| H | 1.58205200  | -0.77957700 | 4.90220600  |
| C | 2.94960400  | -2.19010700 | 4.01025100  |
| H | 3.49723000  | -2.36669000 | 4.93128000  |
| C | 3.33049200  | -2.83672400 | 2.83463300  |

|    |             |             |             |
|----|-------------|-------------|-------------|
| H  | 4.17792000  | -3.51614200 | 2.83535600  |
| C  | 2.62795100  | -2.61148700 | 1.64857600  |
| H  | 2.94571200  | -3.10806100 | 0.73899900  |
| C  | -1.27860900 | 3.39910500  | -0.06042900 |
| C  | -2.70375900 | 3.65967600  | 0.45007500  |
| H  | -3.44790900 | 3.10233700  | -0.12211200 |
| H  | -2.94031000 | 4.72760200  | 0.36668300  |
| H  | -2.79654600 | 3.37300600  | 1.50062000  |
| C  | -1.14717700 | 3.79627300  | -1.53517400 |
| H  | -0.14607100 | 3.57389200  | -1.91775900 |
| H  | -1.31360800 | 4.87540600  | -1.64014500 |
| H  | -1.86991300 | 3.28833300  | -2.17720800 |
| C  | -0.28183900 | 4.21973500  | 0.77665300  |
| H  | -0.35080200 | 3.95875100  | 1.83588600  |
| H  | -0.49873100 | 5.28915700  | 0.66661900  |
| H  | 0.74875900  | 4.04564700  | 0.44857700  |
| H  | 5.70869900  | 0.92747200  | 1.81527000  |
| H  | 6.55476300  | 3.40192700  | -0.77821700 |
| C  | 5.71338200  | 2.87609500  | -0.30622900 |
| H  | 4.49467600  | 4.43783500  | -1.18859100 |
| H  | 2.71167100  | 0.91593800  | -2.49933700 |
| C  | 4.47768200  | 3.35913800  | -1.02713900 |
| H  | 5.69026600  | 3.26714900  | 0.72345700  |
| C  | 3.40467000  | 2.73301300  | -1.54010300 |
| H  | 0.99824800  | 2.28880800  | -0.85271300 |
| C  | 3.03342500  | 1.30291400  | -1.53129700 |
| H  | 2.70891700  | 3.35945300  | -2.09424800 |
| H  | 5.81188900  | 0.93248800  | -1.25041300 |
| C  | 6.04095800  | 1.37474800  | -0.27454400 |
| H  | 7.12289400  | 1.26311400  | -0.13652200 |
| C  | 3.23608200  | 0.38944200  | -0.52274700 |
| Ni | 1.11476300  | 0.90241200  | -0.46138200 |
| H  | 3.23086700  | -0.66626900 | -0.78186800 |
| C  | 5.33236200  | 0.59607500  | 0.83917900  |
| C  | 3.80325300  | 0.75988300  | 0.81990800  |
| H  | 3.53874200  | 1.79736700  | 1.04880000  |
| H  | 5.58229900  | -0.46946000 | 0.75406000  |
| H  | 3.36490700  | 0.13444900  | 1.60029100  |

### TS19

|    |             |             |             |
|----|-------------|-------------|-------------|
| Ni | 0.78734200  | 0.18418500  | -1.24365400 |
| Fe | -3.82007300 | -1.05379200 | 0.74457700  |
| P  | -1.03576200 | -1.09415900 | -1.38245900 |
| P  | -0.13003200 | 1.70785500  | 0.04846500  |

|   |             |             |             |
|---|-------------|-------------|-------------|
| O | -1.94041600 | -0.39078500 | -2.40611000 |
| C | -1.80997200 | -1.07712900 | 0.27714600  |
| C | -2.19928100 | 0.18797600  | 0.85352200  |
| C | -2.69818500 | -0.05542600 | 2.16949100  |
| H | -3.09379500 | 0.68847400  | 2.84526600  |
| C | -2.64522300 | -1.45731100 | 2.41158800  |
| H | -2.99925300 | -1.96276500 | 3.29964700  |
| C | -2.09904300 | -2.08645100 | 1.25551600  |
| H | -1.96478500 | -3.14988900 | 1.13625000  |
| C | -2.00297900 | 1.51661400  | 0.18512000  |
| H | -2.32982200 | 1.42913500  | -0.85546200 |
| C | -2.72048800 | 2.66603800  | 0.88650300  |
| H | -2.37775900 | 2.79083900  | 1.91699300  |
| H | -3.79511700 | 2.45899900  | 0.91645800  |
| H | -2.57059100 | 3.61166200  | 0.36155000  |
| C | -4.84131000 | -1.22311300 | -1.04104200 |
| H | -4.29944000 | -1.23958700 | -1.97556500 |
| C | -5.24363500 | -0.04169700 | -0.34955800 |
| H | -5.11168600 | 0.97065500  | -0.70503700 |
| C | -5.78579200 | -0.42590000 | 0.91509300  |
| H | -6.14347000 | 0.24439500  | 1.68476300  |
| C | -5.71887400 | -1.84931200 | 1.00646700  |
| H | -6.01911200 | -2.44644200 | 1.85660400  |
| C | -5.13640400 | -2.34082200 | -0.20189600 |
| H | -4.91965600 | -3.37575300 | -0.42399200 |
| C | 0.39852900  | 1.49471400  | 1.78623800  |
| C | 0.89904900  | 0.23303100  | 2.14776900  |
| H | 1.01961400  | -0.52818600 | 1.38242600  |
| C | 1.22605100  | -0.04715600 | 3.47327900  |
| H | 1.61445500  | -1.02637000 | 3.73576400  |
| C | 1.05598000  | 0.93145300  | 4.45453900  |
| H | 1.31271400  | 0.71662200  | 5.48756800  |
| C | 0.55343000  | 2.18680400  | 4.10663200  |
| H | 0.41638100  | 2.94864900  | 4.86832200  |
| C | 0.22127100  | 2.46789800  | 2.78070000  |
| H | -0.17359400 | 3.44429400  | 2.52309700  |
| C | 0.12556800  | 3.45901400  | -0.40291600 |
| C | -0.59607300 | 3.95687700  | -1.50145100 |
| H | -1.32444300 | 3.32607700  | -2.00293000 |
| C | -0.37614800 | 5.25325600  | -1.96336500 |
| H | -0.94465400 | 5.62532600  | -2.81027000 |
| C | 0.57584000  | 6.06698300  | -1.34433100 |
| H | 0.74828700  | 7.07592700  | -1.70628100 |
| C | 1.30561100  | 5.57651100  | -0.26162400 |

|   |             |             |             |
|---|-------------|-------------|-------------|
| H | 2.04962400  | 6.20202100  | 0.22270100  |
| C | 1.08382900  | 4.28009700  | 0.20760900  |
| H | 1.65733900  | 3.91259100  | 1.05110600  |
| C | -0.80429200 | -2.90066300 | -1.84479100 |
| C | -2.15823300 | -3.62765900 | -1.83381800 |
| H | -2.59729700 | -3.68008800 | -0.83722000 |
| H | -2.03062400 | -4.65338900 | -2.20171200 |
| H | -2.87201000 | -3.12203100 | -2.48995800 |
| C | 0.21134700  | -3.57521600 | -0.91311200 |
| H | 1.19477600  | -3.09985300 | -0.98343500 |
| H | 0.33858600  | -4.62624200 | -1.20052800 |
| H | -0.09966700 | -3.55474400 | 0.13449000  |
| C | -0.26309700 | -2.91177700 | -3.28446100 |
| H | -0.94666600 | -2.39647500 | -3.96456900 |
| H | -0.14299800 | -3.94670000 | -3.62617700 |
| H | 0.71675900  | -2.42855200 | -3.35373200 |
| H | 1.20396700  | -1.03927300 | -1.92666400 |
| C | 4.60148900  | -1.39239200 | 0.63873400  |
| C | 4.47456100  | -2.57386900 | -0.14005000 |
| C | 5.03877700  | -3.77020600 | 0.31888000  |
| C | 5.70472400  | -3.75265400 | 1.54147900  |
| C | 5.81682100  | -2.57152500 | 2.30265900  |
| C | 5.26773700  | -1.36767500 | 1.86478600  |
| C | 3.45281000  | -1.02204200 | -1.22141700 |
| H | 4.94920300  | -4.67903300 | -0.26756500 |
| H | 6.14731900  | -4.66847200 | 1.92151800  |
| H | 6.34155000  | -2.60063100 | 3.25286200  |
| H | 5.35023500  | -0.45981200 | 2.45386300  |
| N | 3.95148300  | -0.41310400 | -0.08941000 |
| N | 3.74881300  | -2.30670200 | -1.29274400 |
| C | 3.73630200  | 0.98116900  | 0.27655700  |
| H | 2.92134100  | 1.03669300  | 1.00228900  |
| H | 4.64349500  | 1.35372000  | 0.76099000  |
| C | 3.41214600  | 1.81086700  | -0.96311500 |
| H | 3.00892600  | 2.77447200  | -0.64196500 |
| H | 4.34562400  | 2.03038000  | -1.50491900 |
| C | 2.02059200  | 1.99767500  | -3.09994100 |
| H | 1.29812900  | 1.47271500  | -3.73280700 |
| H | 1.55757200  | 2.92652100  | -2.75765400 |
| H | 2.88102100  | 2.27210700  | -3.72964100 |
| C | 2.45901300  | 1.14023000  | -1.93556200 |
| C | 2.60049600  | -0.26438200 | -2.15079700 |
| H | 2.56634500  | -0.66407000 | -3.16161600 |

## 31

|    |             |             |             |
|----|-------------|-------------|-------------|
| Ni | 1.13420900  | 0.36597500  | -1.16883100 |
| Fe | -3.85651700 | -0.80708300 | 0.67402700  |
| P  | -1.18171500 | -1.31520100 | -1.38955600 |
| P  | 0.04788500  | 1.77873300  | 0.05369700  |
| O  | -1.76618900 | -0.42658700 | -2.45990400 |
| C  | -1.86286900 | -1.02756300 | 0.24807400  |
| C  | -2.12851000 | 0.29913000  | 0.76735200  |
| C  | -2.65679300 | 0.13770600  | 2.08300900  |
| H  | -2.98283700 | 0.93896100  | 2.72891700  |
| C  | -2.74230700 | -1.25155400 | 2.37786700  |
| H  | -3.15171100 | -1.68539400 | 3.27942800  |
| C  | -2.25487900 | -1.97427800 | 1.25616000  |
| H  | -2.22254300 | -3.04842000 | 1.16981900  |
| C  | -1.83903000 | 1.60561000  | 0.08271500  |
| H  | -2.10380200 | 1.50146900  | -0.97339500 |
| C  | -2.58191800 | 2.78672200  | 0.70475700  |
| H  | -2.29218200 | 2.94362900  | 1.74685900  |
| H  | -3.66113300 | 2.60535500  | 0.68093300  |
| H  | -2.37883700 | 3.70984100  | 0.15856100  |
| C  | -4.92403600 | -1.03246200 | -1.08529300 |
| H  | -4.44720700 | -1.20600900 | -2.03874200 |
| C  | -5.17583800 | 0.24965600  | -0.51374600 |
| H  | -4.94241500 | 1.20002000  | -0.97245600 |
| C  | -5.73382200 | 0.05329400  | 0.78622800  |
| H  | -6.00050600 | 0.83104500  | 1.48832600  |
| C  | -5.82550900 | -1.35249900 | 1.01819600  |
| H  | -6.17397200 | -1.82455100 | 1.92641500  |
| C  | -5.32519200 | -2.02379100 | -0.13902500 |
| H  | -5.23256000 | -3.09345600 | -0.26196200 |
| C  | 0.45799900  | 1.69003000  | 1.83824900  |
| C  | 0.93290300  | 0.45663800  | 2.31229700  |
| H  | 1.09679200  | -0.35280100 | 1.60656500  |
| C  | 1.18674900  | 0.26548300  | 3.67012200  |
| H  | 1.55658100  | -0.69403800 | 4.01871900  |
| C  | 0.97255400  | 1.30977400  | 4.57146900  |
| H  | 1.17407000  | 1.16616500  | 5.62891600  |
| C  | 0.50272000  | 2.54191200  | 4.11084600  |
| H  | 0.33693500  | 3.35646800  | 4.80993200  |
| C  | 0.24360200  | 2.73215800  | 2.75295700  |
| H  | -0.11719900 | 3.69401200  | 2.40496100  |
| C  | 0.35645200  | 3.50499500  | -0.46758000 |
| C  | -0.32264900 | 4.00211500  | -1.59229000 |
| H  | -1.09057800 | 3.40252600  | -2.07237800 |

|   |             |             |             |
|---|-------------|-------------|-------------|
| C | -0.00625300 | 5.25512300  | -2.11457900 |
| H | -0.54393600 | 5.62676300  | -2.98182900 |
| C | 1.00275500  | 6.02542100  | -1.53159000 |
| H | 1.25123200  | 6.99964900  | -1.94144200 |
| C | 1.69378300  | 5.53264100  | -0.42410400 |
| H | 2.48381500  | 6.12212200  | 0.03208600  |
| C | 1.37546300  | 4.28061200  | 0.10459900  |
| H | 1.92418700  | 3.90784000  | 0.96273700  |
| C | -1.10447500 | -3.12060200 | -1.80557700 |
| C | -2.50767300 | -3.74468500 | -1.79180800 |
| H | -2.95479300 | -3.73540300 | -0.79589100 |
| H | -2.44248800 | -4.78699400 | -2.12418600 |
| H | -3.18333400 | -3.21952700 | -2.47318900 |
| C | -0.14414600 | -3.83966600 | -0.84358200 |
| H | 0.86834100  | -3.42921700 | -0.90998400 |
| H | -0.08587700 | -4.89762200 | -1.12392100 |
| H | -0.46865100 | -3.79325900 | 0.19864200  |
| C | -0.51905100 | -3.17097700 | -3.23008800 |
| H | -1.15402500 | -2.64134000 | -3.94436800 |
| H | -0.43245400 | -4.21666800 | -3.54558900 |
| H | 0.48236700  | -2.72980200 | -3.26126000 |
| H | 0.24788600  | -1.15165500 | -1.18379600 |
| C | 4.36982400  | -1.82041000 | 0.69594300  |
| C | 3.97943800  | -2.97087000 | -0.04333400 |
| C | 4.25108300  | -4.24346500 | 0.47083800  |
| C | 4.89124800  | -4.33316600 | 1.70734400  |
| C | 5.26051400  | -3.18327200 | 2.42888800  |
| C | 5.00506400  | -1.90223500 | 1.93352400  |
| C | 3.34051800  | -1.26374700 | -1.20110700 |
| H | 3.96366400  | -5.13112200 | -0.08431400 |
| H | 5.10856100  | -5.31182300 | 2.12547500  |
| H | 5.75337800  | -3.29274400 | 3.39041500  |
| H | 5.28676700  | -1.01432700 | 2.49109400  |
| N | 3.97420400  | -0.74630100 | -0.08046700 |
| N | 3.34164400  | -2.59229600 | -1.21564500 |
| C | 3.99219100  | 0.66473800  | 0.28415200  |
| H | 3.17017800  | 0.86309300  | 0.98070200  |
| H | 4.93190100  | 0.87642800  | 0.80322100  |
| C | 3.85401900  | 1.54357000  | -0.96026000 |
| H | 3.60311400  | 2.56071300  | -0.64262300 |
| H | 4.82710200  | 1.60364100  | -1.47330200 |
| C | 2.55396800  | 1.98054200  | -3.10927800 |
| H | 1.82586800  | 1.55985500  | -3.80885500 |
| H | 2.16647200  | 2.94053900  | -2.75428500 |

|   |            |             |             |
|---|------------|-------------|-------------|
| H | 3.47930100 | 2.18780100  | -3.66943000 |
| C | 2.82445700 | 1.03987500  | -1.95808500 |
| C | 2.70092400 | -0.36634300 | -2.14490300 |
| H | 2.40246000 | -0.79197100 | -3.09920300 |

**32**

|    |             |            |             |
|----|-------------|------------|-------------|
| Ni | 0.57929600  | 0.19944700 | -0.53811300 |
| C  | 2.15123700  | 1.54903700 | -0.19549900 |
| C  | 2.48147100  | 1.82764400 | -1.60800500 |
| H  | 1.71705700  | 2.45499500 | 0.23814900  |
| C  | 3.22574000  | 1.03985100 | 0.75702600  |
| C  | 3.61045400  | 1.62037500 | -2.32158700 |
| H  | 1.65946400  | 2.28522800 | -2.15986200 |
| H  | 3.73087900  | 0.17059700 | 0.33773300  |
| H  | 2.74068600  | 0.67606300 | 1.67036800  |
| C  | 4.26835600  | 2.09143800 | 1.19629100  |
| H  | 3.58613100  | 1.91683100 | -3.37000200 |
| C  | 4.94184200  | 1.12294600 | -1.81188100 |
| H  | 3.77615900  | 2.78829900 | 1.88913200  |
| H  | 5.05227200  | 1.58560100 | 1.78001800  |
| C  | 4.91767600  | 2.92770400 | 0.08394100  |
| C  | 5.72594200  | 2.16769100 | -0.97717900 |
| H  | 5.56602500  | 0.83313100 | -2.66541200 |
| H  | 4.81826900  | 0.21123000 | -1.22568600 |
| H  | 4.13876800  | 3.51014100 | -0.41964500 |
| H  | 5.58727800  | 3.65953400 | 0.55553800  |
| H  | 6.57937300  | 1.66304000 | -0.50227300 |
| H  | 6.15360200  | 2.91148800 | -1.66241100 |
| H  | 0.51831200  | 0.38331400 | 2.20394400  |
| C  | 0.25218700  | 1.34052300 | 2.63987900  |
| C  | -0.34651400 | 2.31236600 | 1.82380900  |
| C  | 0.51584700  | 1.60048800 | 3.98343900  |
| P  | -0.72290700 | 1.82604200 | 0.09884200  |
| C  | -0.68896600 | 3.55052500 | 2.38768200  |
| H  | 0.98309000  | 0.83736400 | 4.59789300  |
| C  | 0.18663800  | 2.84189900 | 4.53037700  |
| C  | -2.57820400 | 1.51960700 | 0.14493900  |
| C  | -0.58150200 | 3.28027200 | -0.99664600 |
| C  | -0.41651600 | 3.81423200 | 3.73078900  |
| H  | -1.16744200 | 4.31093000 | 1.78194400  |
| H  | 0.39792800  | 3.05102900 | 5.57491000  |
| C  | -2.80395400 | 0.17195100 | 0.76267900  |
| H  | -2.81840800 | 1.43201600 | -0.91758000 |
| C  | -3.39047100 | 2.64638900 | 0.77510100  |



|    |             |             |             |
|----|-------------|-------------|-------------|
| C  | -1.07964400 | 3.10211000  | -2.30087300 |
| C  | 0.09481300  | 4.46294300  | -0.67226400 |
| H  | -0.67904600 | 4.78005100  | 4.15231500  |
| C  | -2.35055200 | -1.05810200 | 0.15747900  |
| C  | -3.47389400 | -0.14317100 | 1.98458200  |
| H  | -3.16646300 | 2.77329200  | 1.83689700  |
| H  | -4.45769700 | 2.42228200  | 0.68329900  |
| H  | -3.20006800 | 3.59638100  | 0.26784300  |
| H  | -1.53829500 | 2.15272600  | -2.57502000 |
| C  | -0.93172500 | 4.11547200  | -3.24588500 |
| C  | 0.24421100  | 5.46998400  | -1.62797700 |
| H  | 0.52082300  | 4.59820800  | 0.31489800  |
| P  | -1.27779600 | -0.93740200 | -1.33570800 |
| C  | -2.78035900 | -2.12289400 | 1.01706400  |
| H  | -3.95584000 | 0.56323500  | 2.64508800  |
| C  | -3.46962200 | -1.56167100 | 2.13531000  |
| H  | -1.31847800 | 3.97080000  | -4.25048800 |
| C  | -0.27423000 | 5.30255200  | -2.91178700 |
| H  | 0.77216900  | 6.38254800  | -1.36696900 |
| O  | -2.00127900 | -0.09293600 | -2.41184700 |
| C  | -1.14277600 | -2.69935400 | -2.02310000 |
| H  | -2.65136100 | -3.17923400 | 0.83619900  |
| H  | -3.94501000 | -2.11738400 | 2.93236600  |
| H  | -0.15615800 | 6.08748200  | -3.65311300 |
| C  | -2.55188900 | -3.22710200 | -2.32679500 |
| C  | -0.40593000 | -3.67112500 | -1.09056600 |
| C  | -0.37284200 | -2.57089900 | -3.34686200 |
| H  | -3.13413800 | -3.38341100 | -1.41727500 |
| H  | -2.48304100 | -4.18662200 | -2.85626800 |
| H  | -3.09564300 | -2.52578100 | -2.96329900 |
| H  | 0.66040000  | -3.45266900 | -1.04735600 |
| H  | -0.51418400 | -4.69594500 | -1.46928600 |
| H  | -0.79738800 | -3.65694100 | -0.07024300 |
| H  | -0.89371000 | -1.89775900 | -4.03251700 |
| H  | -0.28040500 | -3.55430100 | -3.82525700 |
| H  | 0.63549800  | -2.18165800 | -3.18802500 |
| Fe | -4.41737500 | -1.02852700 | 0.37313700  |
| C  | -6.38984500 | -0.39107400 | 0.36692100  |
| C  | -5.69795600 | 0.10674800  | -0.77932200 |
| H  | -6.83699900 | 0.20576000  | 1.15017000  |
| C  | -6.33954400 | -1.81727300 | 0.32395100  |
| C  | -5.21786100 | -1.00657700 | -1.52995300 |
| H  | -5.52281800 | 1.14678200  | -1.01585000 |
| H  | -6.74400100 | -2.49043600 | 1.06746700  |

|   |             |             |             |
|---|-------------|-------------|-------------|
| C | -5.61571500 | -2.19691800 | -0.84723600 |
| H | -4.57160800 | -0.93961500 | -2.39245600 |
| H | -5.38003200 | -3.20848000 | -1.14429400 |
| C | 3.49458300  | -2.85814000 | -0.53607000 |
| C | 2.78438600  | -1.87164200 | -1.25992300 |
| C | 3.10167800  | -1.60585300 | -2.59566900 |
| C | 4.13480600  | -2.34042300 | -3.16702800 |
| C | 4.84059600  | -3.31784000 | -2.43499700 |
| C | 4.53432200  | -3.59702600 | -1.10639800 |
| C | 1.93381500  | -1.94554400 | 0.73740600  |
| H | 2.57482200  | -0.83521800 | -3.14244000 |
| H | 4.40916500  | -2.15486000 | -4.20054500 |
| H | 5.64191500  | -3.86646300 | -2.92010000 |
| H | 5.07384700  | -4.35293800 | -0.54590900 |
| H | 1.33436300  | -1.73394700 | 1.60535700  |
| N | 2.92756900  | -2.87795500 | 0.73289900  |
| N | 1.81804100  | -1.32318000 | -0.42238700 |
| C | 3.34362700  | -3.75342400 | 1.82960300  |
| H | 3.20241000  | -4.78921600 | 1.50471000  |
| H | 4.41561600  | -3.60300500 | 1.99362500  |
| C | 2.57013800  | -3.52237900 | 3.12393400  |
| H | 1.49573000  | -3.65722900 | 2.93779200  |
| H | 2.83961200  | -4.34128800 | 3.80405400  |
| C | 1.89599400  | -2.01043800 | 5.04444200  |
| H | 2.14176400  | -1.09195900 | 5.58352500  |
| H | 0.84146100  | -1.96094700 | 4.74225500  |
| H | 1.97815800  | -2.84959000 | 5.74721700  |
| C | 2.79171600  | -2.21047900 | 3.84953000  |
| C | 3.69724900  | -1.29809800 | 3.48377700  |
| H | 3.82914400  | -0.38122700 | 4.05067600  |
| H | 4.33611400  | -1.41704300 | 2.61531200  |

## TS20

|    |             |             |             |
|----|-------------|-------------|-------------|
| Fe | -4.19208300 | -1.50732800 | 0.38806400  |
| P  | -1.19033800 | -1.02595600 | -1.41507000 |
| P  | -0.93897400 | 1.88638900  | 0.20887500  |
| O  | -1.87104000 | -0.07813700 | -2.39927100 |
| C  | -2.16220800 | -1.25673300 | 0.09876700  |
| C  | -2.73570200 | -0.11353700 | 0.77458100  |
| C  | -3.29775000 | -0.56899600 | 2.00456000  |
| H  | -3.83597800 | 0.04068100  | 2.71542500  |
| C  | -3.10487100 | -1.97891800 | 2.09167900  |
| H  | -3.46937000 | -2.62215900 | 2.88066300  |
| C  | -2.40974200 | -2.40611200 | 0.92374500  |

|   |             |             |             |
|---|-------------|-------------|-------------|
| H | -2.15388200 | -3.42738600 | 0.68906200  |
| C | -2.72161900 | 1.28360800  | 0.22918100  |
| H | -2.95320200 | 1.21911200  | -0.83585400 |
| C | -3.70126300 | 2.23288000  | 0.91357300  |
| H | -3.49221000 | 2.34376100  | 1.97984700  |
| H | -4.71971800 | 1.84760900  | 0.80803800  |
| H | -3.66483900 | 3.22409100  | 0.45342900  |
| C | -5.33292100 | -2.81530700 | -0.74860100 |
| H | -5.00892900 | -3.79666400 | -1.06431700 |
| C | -5.12793900 | -1.59298100 | -1.45822900 |
| H | -4.59461600 | -1.47082600 | -2.38857000 |
| C | -5.67323900 | -0.53361600 | -0.67593200 |
| H | -5.63768600 | 0.51689100  | -0.92734100 |
| C | -6.21661700 | -1.09795100 | 0.51823100  |
| H | -6.66902200 | -0.54976500 | 1.33311300  |
| C | -6.00627300 | -2.50909100 | 0.47276700  |
| H | -6.27255700 | -3.21573200 | 1.24670400  |
| C | -0.64450600 | 2.47607500  | 1.91377300  |
| C | 0.13605900  | 1.65730700  | 2.74020100  |
| H | 0.57128600  | 0.76087600  | 2.31669400  |
| C | 0.36330100  | 1.99560300  | 4.07315700  |
| H | 0.97609200  | 1.35206100  | 4.69722100  |
| C | -0.18864100 | 3.16635500  | 4.59523300  |
| H | -0.00849300 | 3.43916700  | 5.63074000  |
| C | -0.97142500 | 3.98925800  | 3.78201600  |
| H | -1.40282500 | 4.90065900  | 4.18509300  |
| C | -1.20407600 | 3.64656900  | 2.45017100  |
| H | -1.81350000 | 4.29401200  | 1.83044500  |
| C | -0.99008100 | 3.34899800  | -0.88368300 |
| C | -1.51003100 | 3.16127000  | -2.17711300 |
| H | -1.88966400 | 2.18577700  | -2.46919700 |
| C | -1.47538900 | 4.20448600  | -3.10022900 |
| H | -1.87782700 | 4.04995600  | -4.09698700 |
| C | -0.90857700 | 5.43395400  | -2.75566200 |
| H | -0.87795600 | 6.24219100  | -3.48032800 |
| C | -0.36610000 | 5.61435800  | -1.48357900 |
| H | 0.09314200  | 6.56101300  | -1.21480100 |
| C | -0.40282700 | 4.57721200  | -0.55013200 |
| H | 0.03841800  | 4.72568800  | 0.42852100  |
| C | -0.87788500 | -2.68014800 | -2.24947900 |
| C | -2.23139600 | -3.29978600 | -2.62600400 |
| H | -2.80901500 | -3.58034100 | -1.74272800 |
| H | -2.06113200 | -4.20262800 | -3.22479700 |
| H | -2.82682500 | -2.60614500 | -3.22433700 |

|    |             |             |             |
|----|-------------|-------------|-------------|
| C  | -0.05974400 | -3.66044900 | -1.39613800 |
| H  | 0.96354800  | -3.31841900 | -1.24508300 |
| H  | -0.00105500 | -4.62010100 | -1.92304500 |
| H  | -0.50580900 | -3.85478800 | -0.41877500 |
| C  | -0.08851600 | -2.33682500 | -3.52790100 |
| H  | -0.65398600 | -1.65490100 | -4.16715500 |
| H  | 0.10472000  | -3.25940100 | -4.08804300 |
| H  | 0.87649000  | -1.87488500 | -3.29665100 |
| H  | 0.57203300  | -1.01204400 | -1.00057200 |
| Ni | 0.60262700  | 0.43125300  | -0.45670400 |
| N  | 2.78678200  | -1.17678600 | -1.68563300 |
| C  | 3.66491500  | -2.18143300 | -1.32256900 |
| C  | 1.96591100  | -1.01090400 | -0.66026900 |
| C  | 3.33800400  | -2.66773100 | -0.02958900 |
| C  | 4.73219300  | -2.74406300 | -2.03715500 |
| N  | 2.25447500  | -1.90501700 | 0.37522200  |
| C  | 4.03471100  | -3.72805500 | 0.55745800  |
| C  | 5.43334100  | -3.79132100 | -1.44973900 |
| H  | 4.98646600  | -2.36705400 | -3.02282400 |
| C  | 1.43901700  | -2.10320800 | 1.56308500  |
| C  | 5.08324300  | -4.28019800 | -0.17410600 |
| H  | 3.78458000  | -4.10345900 | 1.54156100  |
| H  | 6.26372000  | -4.24697400 | -1.98109700 |
| H  | 0.46056800  | -1.66482900 | 1.34867400  |
| H  | 1.29140400  | -3.17922000 | 1.70497500  |
| C  | 1.99907100  | -1.45536500 | 2.84312300  |
| H  | 5.64817500  | -5.10416400 | 0.25192900  |
| H  | 2.20708700  | -0.40726100 | 2.62517700  |
| H  | 1.19362900  | -1.48559200 | 3.59000100  |
| C  | 3.23825800  | -2.10663200 | 3.40727500  |
| C  | 3.03910300  | -3.42043200 | 4.11639300  |
| C  | 4.43935500  | -1.53627200 | 3.27590000  |
| H  | 3.98898200  | -3.86163200 | 4.42977500  |
| H  | 2.41114100  | -3.28972000 | 5.00763200  |
| H  | 2.52006700  | -4.14898500 | 3.48031900  |
| H  | 5.33990200  | -2.00596600 | 3.66248500  |
| H  | 4.56349500  | -0.58630800 | 2.76402200  |
| C  | 2.01603000  | 1.85073300  | -0.21882400 |
| C  | 2.13767400  | 2.13937200  | -1.66329900 |
| H  | 1.50104900  | 2.68311800  | 0.27141000  |
| C  | 3.23097700  | 1.48367700  | 0.62105900  |
| C  | 3.17482900  | 1.97559700  | -2.51216100 |
| H  | 1.23127500  | 2.55290200  | -2.10385400 |
| H  | 3.74276700  | 0.61611000  | 0.20826500  |

|   |            |            |             |
|---|------------|------------|-------------|
| H | 2.87296600 | 1.17184600 | 1.60845700  |
| C | 4.23522000 | 2.63364700 | 0.86287000  |
| H | 3.00222900 | 2.26053000 | -3.54947600 |
| C | 4.57524100 | 1.54360700 | -2.16762600 |
| H | 3.77792900 | 3.34547100 | 1.56435300  |
| H | 5.11033400 | 2.21605300 | 1.38152000  |
| C | 4.70353000 | 3.43253000 | -0.36227900 |
| C | 5.41336800 | 2.65139300 | -1.47577600 |
| H | 5.09572200 | 1.24461700 | -3.08467700 |
| H | 4.54825900 | 0.65226400 | -1.54270900 |
| H | 3.84444500 | 3.95707300 | -0.79367200 |
| H | 5.38929900 | 4.21431600 | -0.00899100 |
| H | 6.33208600 | 2.19500500 | -1.08218800 |
| H | 5.73251000 | 3.37665200 | -2.23579800 |

**c1**

|    |             |             |             |
|----|-------------|-------------|-------------|
| Ni | 0.41236800  | 0.97049600  | 1.54743300  |
| Fe | -3.41163400 | -1.88494300 | -0.97611200 |
| P  | -0.59019800 | -1.62381300 | 0.90118700  |
| P  | -0.72758900 | 1.88470500  | -0.05092400 |
| O  | 0.28797100  | -1.80754700 | -0.31631900 |
| C  | -2.26550500 | -1.09077000 | 0.52912100  |
| C  | -2.57670700 | -0.07934400 | -0.46129100 |
| C  | -3.99573400 | 0.05331800  | -0.49964000 |
| H  | -4.54430000 | 0.70653700  | -1.16140600 |
| C  | -4.56891000 | -0.86512900 | 0.42490700  |
| H  | -5.62527000 | -1.03116300 | 0.58361100  |
| C  | -3.51340300 | -1.57232700 | 1.06079500  |
| H  | -3.63821600 | -2.35725200 | 1.78936700  |
| C  | -1.58318700 | 0.71199000  | -1.25959700 |
| H  | -0.78280200 | 0.02737000  | -1.55458800 |
| C  | -2.18695900 | 1.38306000  | -2.49151500 |
| H  | -2.95755400 | 2.10835900  | -2.21830400 |
| H  | -2.64557300 | 0.63279700  | -3.14315000 |
| H  | -1.42005800 | 1.90953300  | -3.06393200 |
| C  | -3.52820300 | -3.91754700 | -1.36513700 |
| H  | -3.60878600 | -4.68030000 | -0.60388600 |
| C  | -2.31392100 | -3.38007700 | -1.89023800 |
| H  | -1.30987500 | -3.62921300 | -1.58118200 |
| C  | -2.65299200 | -2.36745600 | -2.83543400 |
| H  | -1.94927800 | -1.75064300 | -3.37643300 |
| C  | -4.07701600 | -2.27774400 | -2.89679700 |
| H  | -4.64599700 | -1.57925100 | -3.49466800 |
| C  | -4.61817100 | -3.23572800 | -1.98729100 |

|   |             |             |             |
|---|-------------|-------------|-------------|
| H | -5.66774100 | -3.38937200 | -1.77739200 |
| C | -2.05247000 | 3.08431900  | 0.34998000  |
| C | -2.73989000 | 2.88245500  | 1.55613800  |
| H | -2.42086800 | 2.08040300  | 2.21584200  |
| C | -3.81507200 | 3.69967300  | 1.90529100  |
| H | -4.34127600 | 3.53094300  | 2.84023700  |
| C | -4.20459000 | 4.73862600  | 1.05824800  |
| H | -5.03594100 | 5.38154300  | 1.33212700  |
| C | -3.51849700 | 4.95563400  | -0.13896900 |
| H | -3.81587600 | 5.76685500  | -0.79714800 |
| C | -2.45126200 | 4.13101200  | -0.49525500 |
| H | -1.92180800 | 4.30703700  | -1.42547600 |
| C | 0.47532900  | 2.78867500  | -1.09779600 |
| C | 1.19750300  | 2.10860800  | -2.09182600 |
| H | 0.95962900  | 1.07811700  | -2.33435600 |
| C | 2.24378900  | 2.73829800  | -2.76617500 |
| H | 2.79166600  | 2.19602600  | -3.53111300 |
| C | 2.58964700  | 4.05423600  | -2.45467700 |
| H | 3.40579500  | 4.54260700  | -2.97842900 |
| C | 1.88466500  | 4.73565500  | -1.46038100 |
| H | 2.15039000  | 5.75794000  | -1.20705100 |
| C | 0.83989800  | 4.10729300  | -0.78300200 |
| H | 0.30872600  | 4.64125400  | -0.00152500 |
| C | -0.58127300 | -3.05385900 | 2.08760300  |
| C | -1.29852700 | -4.27486300 | 1.49425000  |
| H | -2.36146500 | -4.09337900 | 1.32787100  |
| H | -1.20275100 | -5.12009200 | 2.18521600  |
| H | -0.84966800 | -4.57086500 | 0.54221300  |
| C | -1.19761700 | -2.62460700 | 3.42885200  |
| H | -0.70982300 | -1.72753600 | 3.82518600  |
| H | -1.05961400 | -3.42673600 | 4.16234600  |
| H | -2.26801500 | -2.42145400 | 3.35860500  |
| C | 0.90866800  | -3.38421100 | 2.29702100  |
| H | 1.39344300  | -3.66403900 | 1.35923600  |
| H | 0.99737700  | -4.22225600 | 2.99691300  |
| H | 1.45184700  | -2.53495900 | 2.72293200  |
| H | -0.06030700 | -0.66180900 | 1.86639400  |
| C | 5.29202300  | -0.71213000 | -0.48347100 |
| C | 5.60376800  | -1.86739600 | -1.24707100 |
| C | 6.93673500  | -2.13773900 | -1.58192600 |
| C | 7.91567700  | -1.24936300 | -1.14586000 |
| C | 7.58689000  | -0.10566600 | -0.38933200 |
| C | 6.26886400  | 0.18415600  | -0.04371600 |
| C | 3.47427700  | -1.86620800 | -0.99328300 |

|   |            |             |             |
|---|------------|-------------|-------------|
| H | 7.18694900 | -3.01794800 | -2.16596900 |
| H | 8.95668200 | -1.43774900 | -1.39158600 |
| H | 8.37955800 | 0.56335600  | -0.06751900 |
| H | 6.01652100 | 1.06384200  | 0.53998800  |
| H | 2.41525300 | -2.09803200 | -1.00298600 |
| N | 3.91605900 | -0.73904400 | -0.33946200 |
| N | 4.44075700 | -2.56628600 | -1.54789100 |
| C | 3.08215900 | 0.21502800  | 0.37791400  |
| H | 3.38413200 | 1.22459600  | 0.08739900  |
| H | 2.05846800 | 0.06786500  | 0.02520200  |
| C | 3.13388500 | 0.02691000  | 1.90120200  |
| H | 2.97201100 | -1.03667600 | 2.11012700  |
| H | 4.14803900 | 0.25335100  | 2.26553700  |
| C | 1.88534000 | 0.40472100  | 4.09689200  |
| H | 1.10182200 | 0.99288200  | 4.58503000  |
| H | 1.60046300 | -0.65234400 | 4.15784700  |
| H | 2.80584200 | 0.51888100  | 4.69061600  |
| C | 2.09979000 | 0.84885700  | 2.66344200  |
| C | 1.79286700 | 2.16934700  | 2.27679500  |
| H | 1.34248400 | 2.84892600  | 3.00079200  |
| H | 2.30606600 | 2.66273100  | 1.45370400  |

**c1-2**

|    |             |             |             |
|----|-------------|-------------|-------------|
| Ni | 0.32796600  | 1.15515600  | -1.23885300 |
| Fe | -2.63942600 | -2.54185600 | 1.11251800  |
| P  | -1.02323500 | -1.34334400 | -1.65307500 |
| P  | -1.28550600 | 1.83614800  | 0.04747200  |
| O  | -2.32158700 | -0.95711500 | -2.31565100 |
| C  | -1.14293500 | -1.53154700 | 0.13161100  |
| C  | -1.91836800 | -0.62607200 | 0.95706100  |
| C  | -1.78990200 | -1.06747000 | 2.30636200  |
| H  | -2.27277100 | -0.61614600 | 3.16027700  |
| C  | -0.97949200 | -2.23796900 | 2.33181500  |
| H  | -0.74710300 | -2.83103300 | 3.20542500  |
| C  | -0.57912700 | -2.53072600 | 0.99933700  |
| H  | 0.01013400  | -3.38187100 | 0.69823700  |
| C  | -2.64234600 | 0.59592500  | 0.47346900  |
| H  | -3.08407200 | 0.34974600  | -0.49640400 |
| C  | -3.71442300 | 1.10323900  | 1.43545600  |
| H  | -3.29309700 | 1.37306200  | 2.40678900  |
| H  | -4.47281600 | 0.33138100  | 1.59977500  |
| H  | -4.21171600 | 1.98826100  | 1.03095800  |
| C  | -3.35723700 | -4.39451000 | 0.51200000  |
| H  | -2.73901600 | -5.21099300 | 0.16723800  |

|   |             |             |             |
|---|-------------|-------------|-------------|
| C | -3.91314000 | -3.35908400 | -0.29882500 |
| H | -3.77003400 | -3.22378200 | -1.36033800 |
| C | -4.62679400 | -2.46707300 | 0.55409800  |
| H | -5.12810600 | -1.56259000 | 0.24029500  |
| C | -4.51137200 | -2.94802200 | 1.89387800  |
| H | -4.91241500 | -2.47223200 | 2.77811700  |
| C | -3.72558200 | -4.13930100 | 1.86762000  |
| H | -3.42785000 | -4.72283400 | 2.72795000  |
| C | -0.70608900 | 2.35041800  | 1.71271800  |
| C | 0.43362700  | 1.70845800  | 2.21922100  |
| H | 0.95383200  | 0.99093200  | 1.59338100  |
| C | 0.89714100  | 1.98752900  | 3.50480100  |
| H | 1.77976300  | 1.48015000  | 3.88327600  |
| C | 0.23071900  | 2.92403500  | 4.29693000  |
| H | 0.59339800  | 3.14979700  | 5.29540300  |
| C | -0.90117800 | 3.57442800  | 3.80019100  |
| H | -1.42088300 | 4.30551900  | 4.41273000  |
| C | -1.37063500 | 3.28735400  | 2.51803300  |
| H | -2.24986500 | 3.79820400  | 2.14039400  |
| C | -2.17388900 | 3.29635600  | -0.61084900 |
| C | -3.34180700 | 3.15041300  | -1.37446500 |
| H | -3.78623300 | 2.17031800  | -1.51282900 |
| C | -3.93871900 | 4.26006600  | -1.97398800 |
| H | -4.84540800 | 4.13077300  | -2.55772900 |
| C | -3.37492900 | 5.52803500  | -1.82676800 |
| H | -3.84149000 | 6.39044500  | -2.29335400 |
| C | -2.20409400 | 5.68070500  | -1.08117000 |
| H | -1.75477100 | 6.66291300  | -0.96621400 |
| C | -1.60480300 | 4.57388500  | -0.48194200 |
| H | -0.69306100 | 4.70164000  | 0.09282200  |
| C | -0.15704300 | -2.78949700 | -2.43882400 |
| C | -0.93382400 | -4.09116900 | -2.20044100 |
| H | -0.97198800 | -4.35625800 | -1.14212700 |
| H | -0.44287000 | -4.90985700 | -2.73891800 |
| H | -1.95886200 | -4.01474900 | -2.57216500 |
| C | 1.28486600  | -2.89739500 | -1.92311600 |
| H | 1.82270700  | -1.95354100 | -2.04689100 |
| H | 1.82200300  | -3.65961600 | -2.49824600 |
| H | 1.33401700  | -3.18643800 | -0.87159100 |
| C | -0.13704400 | -2.45675800 | -3.94313300 |
| H | -1.14901400 | -2.35348800 | -4.34141900 |
| H | 0.37297200  | -3.26051800 | -4.48531900 |
| H | 0.40140200  | -1.52324300 | -4.14104300 |
| H | 0.08475800  | -0.41012500 | -1.89744700 |



|   |            |             |             |
|---|------------|-------------|-------------|
| C | 5.56062400 | -0.25801800 | 0.47327600  |
| C | 6.24977300 | -1.44911100 | 0.81761900  |
| C | 7.61265500 | -1.39528000 | 1.13696800  |
| C | 8.24341000 | -0.15552700 | 1.10258200  |
| C | 7.54157200 | 1.01867500  | 0.75937900  |
| C | 6.18699700 | 0.99011000  | 0.43758100  |
| C | 4.22309900 | -2.01366100 | 0.42389400  |
| H | 8.14983900 | -2.30040500 | 1.40199800  |
| H | 9.29978500 | -0.08626000 | 1.34439200  |
| H | 8.07052700 | 1.96684700  | 0.74391300  |
| H | 5.64917800 | 1.89427400  | 0.17117000  |
| H | 3.30087000 | -2.56250600 | 0.28562200  |
| N | 4.25591800 | -0.65423200 | 0.22782300  |
| N | 5.37791000 | -2.53131500 | 0.77612300  |
| C | 3.15280600 | 0.19726400  | -0.19911200 |
| H | 2.22016800 | -0.33968800 | -0.00287000 |
| H | 3.14942700 | 1.08791800  | 0.43474700  |
| C | 1.94609500 | 1.48294500  | -3.68027800 |
| H | 1.79469900 | 0.47725600  | -4.09027800 |
| H | 2.84753600 | 1.89100300  | -4.16474100 |
| C | 3.23474400 | 0.57503000  | -1.68154500 |
| H | 3.25317400 | -0.35218300 | -2.26694500 |
| H | 4.20290200 | 1.06344500  | -1.87060600 |
| C | 2.09592600 | 1.45962600  | -2.17019600 |
| C | 1.66213400 | 2.57304200  | -1.41385500 |
| H | 2.10784800 | 2.81859300  | -0.45041900 |
| H | 1.19663900 | 3.41960800  | -1.91911100 |
| H | 1.09641800 | 2.09976700  | -3.98821000 |

**c1-3**

|    |             |             |             |
|----|-------------|-------------|-------------|
| Ni | -0.41289000 | -1.19726500 | 0.96289600  |
| Fe | 4.38254700  | 0.56636600  | -0.91725900 |
| P  | 2.32476400  | -1.77035700 | 0.47211800  |
| P  | -0.05643000 | 0.91843600  | 0.67403800  |
| O  | 2.71725400  | -1.35613800 | 1.86889100  |
| C  | 2.65179200  | -0.52440100 | -0.77958700 |
| C  | 2.38046900  | 0.88327400  | -0.56832600 |
| C  | 2.76779700  | 1.56953100  | -1.75764800 |
| H  | 2.72065100  | 2.63770600  | -1.90629200 |
| C  | 3.28689300  | 0.62506700  | -2.68714700 |
| H  | 3.70438400  | 0.85277300  | -3.65800500 |
| C  | 3.21963900  | -0.66446100 | -2.09382700 |
| H  | 3.57129900  | -1.57917500 | -2.54391200 |
| C  | 1.75001000  | 1.49872900  | 0.64773400  |

|   |             |             |             |
|---|-------------|-------------|-------------|
| H | 2.18411500  | 1.02267100  | 1.53144100  |
| C | 1.93115500  | 3.01442400  | 0.71096500  |
| H | 1.44134600  | 3.51386900  | -0.12923000 |
| H | 2.99562800  | 3.26828500  | 0.67868100  |
| H | 1.51111400  | 3.42181900  | 1.63238600  |
| C | 6.26023000  | -0.28479600 | -0.68878500 |
| H | 6.55150000  | -1.24300200 | -1.09446300 |
| C | 5.65839900  | -0.06134900 | 0.58686400  |
| H | 5.37580400  | -0.81346000 | 1.30846600  |
| C | 5.39529600  | 1.33488100  | 0.71028400  |
| H | 4.90920000  | 1.81320500  | 1.54894700  |
| C | 5.83421000  | 1.97679700  | -0.48758600 |
| H | 5.73903100  | 3.02909100  | -0.71739400 |
| C | 6.36805700  | 0.97501800  | -1.35313600 |
| H | 6.74864400  | 1.13631500  | -2.35228200 |
| C | -0.66800400 | 1.61059600  | -0.91264900 |
| C | -0.65143000 | 0.74205000  | -2.01662100 |
| H | -0.34107600 | -0.28886800 | -1.87112500 |
| C | -1.02223800 | 1.19059000  | -3.28376200 |
| H | -1.00450100 | 0.50579200  | -4.12623400 |
| C | -1.43242000 | 2.51352600  | -3.46214700 |
| H | -1.74046400 | 2.86120200  | -4.44340700 |
| C | -1.45285400 | 3.38627400  | -2.37225400 |
| H | -1.77220700 | 4.41548500  | -2.50600100 |
| C | -1.06245200 | 2.94254100  | -1.10739400 |
| H | -1.07468000 | 3.63329400  | -0.27171500 |
| C | -0.81736000 | 1.91392800  | 2.01061900  |
| C | -0.15148500 | 2.00037200  | 3.24464300  |
| H | 0.84180800  | 1.57651100  | 3.35718500  |
| C | -0.76396800 | 2.60402700  | 4.34143700  |
| H | -0.23265600 | 2.66412900  | 5.28669500  |
| C | -2.05766600 | 3.11891300  | 4.22983500  |
| H | -2.53636100 | 3.58394900  | 5.08624100  |
| C | -2.73322400 | 3.02474400  | 3.01291700  |
| H | -3.74219200 | 3.41481200  | 2.91633900  |
| C | -2.11933000 | 2.42625800  | 1.91150000  |
| H | -2.66291400 | 2.35601900  | 0.97660800  |
| C | 2.92778500  | -3.44846100 | -0.04675400 |
| C | 4.44815500  | -3.45269900 | -0.25906200 |
| H | 4.74946500  | -2.81702800 | -1.09385900 |
| H | 4.78360500  | -4.47412200 | -0.47250100 |
| H | 4.97324700  | -3.11035700 | 0.63717100  |
| C | 2.17607200  | -3.90697200 | -1.30632400 |
| H | 1.09170500  | -3.88904000 | -1.15177200 |

|   |             |             |             |
|---|-------------|-------------|-------------|
| H | 2.45869800  | -4.93900400 | -1.54234300 |
| H | 2.40209700  | -3.29326000 | -2.18093900 |
| C | 2.55957200  | -4.37266800 | 1.13038800  |
| H | 3.06696000  | -4.06885800 | 2.04892900  |
| H | 2.85471000  | -5.40021200 | 0.89037900  |
| H | 1.48065000  | -4.36659400 | 1.32032700  |
| H | 0.91229400  | -2.09308300 | 0.29073200  |
| C | -5.81949000 | -0.93730700 | -0.94798300 |
| C | -6.48855100 | 0.07968500  | -1.67656900 |
| C | -7.87970200 | 0.02308300  | -1.83071700 |
| C | -8.55905000 | -1.04524000 | -1.25311400 |
| C | -7.87741100 | -2.04766900 | -0.53243100 |
| C | -6.49523700 | -2.01251900 | -0.36555900 |
| C | -4.40487400 | 0.57700800  | -1.71584200 |
| H | -8.40132500 | 0.79540400  | -2.38714800 |
| H | -9.63796300 | -1.11219700 | -1.35704500 |
| H | -8.44369400 | -2.86517100 | -0.09626200 |
| H | -5.97301700 | -2.78407800 | 0.19103400  |
| H | -3.44931800 | 1.04986900  | -1.89828800 |
| N | -4.47880500 | -0.59135600 | -0.99407600 |
| N | -5.56948800 | 1.01229100  | -2.14290100 |
| C | -3.37652200 | -1.29217800 | -0.34671500 |
| H | -3.46836200 | -2.35748200 | -0.57864200 |
| H | -2.44592100 | -0.93693800 | -0.79484200 |
| C | -3.34370500 | -1.05254300 | 1.16403200  |
| H | -3.37729600 | 0.02799600  | 1.34090200  |
| H | -4.26332400 | -1.45930100 | 1.61279800  |
| C | -2.06479200 | -1.20356700 | 3.34134400  |
| H | -1.15052600 | -1.56633700 | 3.81957800  |
| H | -2.09540500 | -0.11591900 | 3.44934300  |
| H | -2.92142200 | -1.61084600 | 3.90093400  |
| C | -2.13539400 | -1.62157600 | 1.88547200  |
| C | -1.47254100 | -2.79815500 | 1.46742800  |
| H | -0.93924000 | -3.39759900 | 2.20493700  |
| H | -1.79938900 | -3.34752200 | 0.58551200  |

**c1-4**

|    |             |             |             |
|----|-------------|-------------|-------------|
| Ni | 0.53331000  | -0.32552700 | 1.22308700  |
| Fe | -4.43849300 | -0.47236800 | -0.68743700 |
| P  | -1.49548000 | -2.02754300 | 0.04066000  |
| P  | -0.13867000 | 1.35885500  | 0.02764100  |
| O  | -1.11451000 | -2.07778600 | -1.41865900 |
| C  | -2.74680400 | -0.79726500 | 0.42792300  |
| C  | -2.72511100 | 0.53035700  | -0.15123500 |

|   |             |             |             |
|---|-------------|-------------|-------------|
| C | -3.85866400 | 1.23206100  | 0.35440800  |
| H | -4.14075800 | 2.23923600  | 0.08665700  |
| C | -4.59036400 | 0.36345700  | 1.21289300  |
| H | -5.52449400 | 0.59541900  | 1.70515100  |
| C | -3.91320400 | -0.88564700 | 1.26397800  |
| H | -4.24430700 | -1.75346700 | 1.81144800  |
| C | -1.66335800 | 1.07580300  | -1.06032500 |
| H | -1.36245900 | 0.26755100  | -1.73286800 |
| C | -2.11885700 | 2.29157200  | -1.86519400 |
| H | -2.39389100 | 3.12702400  | -1.21711000 |
| H | -2.99314200 | 2.03246300  | -2.47021000 |
| H | -1.32964900 | 2.63530500  | -2.53737100 |
| C | -5.66357100 | -1.98550800 | -1.39882200 |
| H | -5.96085100 | -2.85133900 | -0.82436200 |
| C | -4.49144900 | -1.87471000 | -2.20638700 |
| H | -3.72483900 | -2.62406300 | -2.33490200 |
| C | -4.45340500 | -0.55642900 | -2.74957900 |
| H | -3.66445400 | -0.15420300 | -3.36884600 |
| C | -5.60271100 | 0.14939300  | -2.27989400 |
| H | -5.84085500 | 1.18434000  | -2.48321300 |
| C | -6.35024000 | -0.73380400 | -1.44351400 |
| H | -7.25454200 | -0.48522600 | -0.90532900 |
| C | -0.69487100 | 2.76692600  | 1.06741300  |
| C | -1.18926200 | 2.44883400  | 2.34161300  |
| H | -1.15401200 | 1.41534400  | 2.67488700  |
| C | -1.71097800 | 3.44133800  | 3.17055200  |
| H | -2.09034900 | 3.17971400  | 4.15394900  |
| C | -1.73452200 | 4.76880400  | 2.73900800  |
| H | -2.13247800 | 5.54502000  | 3.38601200  |
| C | -1.23921700 | 5.09765200  | 1.47540500  |
| H | -1.25320500 | 6.12954800  | 1.13682600  |
| C | -0.72724200 | 4.10328500  | 0.64122500  |
| H | -0.34552700 | 4.37025800  | -0.33806300 |
| C | 1.09118800  | 2.07384500  | -1.13210900 |
| C | 1.18950500  | 1.58820100  | -2.44592200 |
| H | 0.50631700  | 0.82159300  | -2.79694500 |
| C | 2.16356200  | 2.08256000  | -3.31473200 |
| H | 2.21921100  | 1.70287900  | -4.33053200 |
| C | 3.06590700  | 3.05543300  | -2.87951700 |
| H | 3.82632400  | 3.43578900  | -3.55426400 |
| C | 2.99721500  | 3.52017400  | -1.56463800 |
| H | 3.70587100  | 4.26358400  | -1.21215500 |
| C | 2.02040300  | 3.03203000  | -0.69662500 |
| H | 1.97385300  | 3.40532700  | 0.32102900  |

|   |             |             |             |
|---|-------------|-------------|-------------|
| C | -1.88974500 | -3.67248300 | 0.80664200  |
| C | -3.20418100 | -4.24418500 | 0.25638400  |
| H | -4.06492200 | -3.62209000 | 0.51005600  |
| H | -3.37089300 | -5.24155400 | 0.67934200  |
| H | -3.16632800 | -4.34677400 | -0.83170100 |
| C | -1.92244800 | -3.54449900 | 2.33798100  |
| H | -0.99862600 | -3.09819900 | 2.72055700  |
| H | -2.01873300 | -4.54177100 | 2.78197100  |
| H | -2.75984100 | -2.94180400 | 2.69555100  |
| C | -0.71396700 | -4.58144800 | 0.39793100  |
| H | -0.63615300 | -4.66839300 | -0.68837900 |
| H | -0.86504900 | -5.58146000 | 0.81921600  |
| H | 0.23937300  | -4.19764000 | 0.77795900  |
| H | -0.37469400 | -1.74510700 | 0.92938000  |
| C | 5.88754800  | -1.22316100 | -0.25469300 |
| C | 6.78934600  | -0.78505400 | -1.25852500 |
| C | 8.12676900  | -1.19909700 | -1.21826600 |
| C | 8.52253200  | -2.03408600 | -0.17740400 |
| C | 7.61243100  | -2.45825600 | 0.81260000  |
| C | 6.27766900  | -2.06024200 | 0.79319300  |
| C | 4.88825900  | 0.08276400  | -1.72936100 |
| H | 8.82506900  | -0.87189700 | -1.98217100 |
| H | 9.55434200  | -2.36844400 | -0.12287800 |
| H | 7.96057700  | -3.10901700 | 1.60922100  |
| H | 5.57893000  | -2.38572700 | 1.55731000  |
| H | 4.08077500  | 0.64094500  | -2.18296000 |
| N | 4.67076900  | -0.65117900 | -0.58916100 |
| N | 6.12730500  | 0.03330400  | -2.16644900 |
| C | 3.42663900  | -0.76353000 | 0.16188600  |
| H | 3.31512500  | -1.80830600 | 0.46146600  |
| H | 2.59645900  | -0.52948400 | -0.51035600 |
| C | 3.39857700  | 0.17080700  | 1.37577300  |
| H | 3.45127700  | 1.20284300  | 1.01082600  |
| H | 4.31297400  | 0.00907900  | 1.96699700  |
| C | 2.02785800  | 1.15196700  | 3.26998400  |
| H | 1.15804400  | 1.00930500  | 3.91682800  |
| H | 1.91510700  | 2.11744800  | 2.76556900  |
| H | 2.91614500  | 1.22534200  | 3.91663000  |
| C | 2.18441400  | 0.01585500  | 2.27945500  |
| C | 1.64368100  | -1.25869400 | 2.57232800  |
| H | 1.08885600  | -1.39681200 | 3.50084300  |
| H | 2.09439500  | -2.16861700 | 2.17891100  |

|    |             |             |             |
|----|-------------|-------------|-------------|
| Ni | 0.89746800  | 0.56214600  | 0.13161000  |
| P  | -0.74817700 | 1.83620900  | -0.02494500 |
| N  | 2.63464500  | -0.20950600 | 0.29786400  |
| C  | -2.37390300 | 1.14229700  | -0.74293000 |
| C  | -1.37505000 | 2.63079200  | 1.51522600  |
| C  | -0.38386200 | 3.24626400  | -1.15328600 |
| C  | 3.19595400  | -0.80883400 | 1.42708800  |
| C  | 3.57812700  | -0.24393200 | -0.63248400 |
| C  | -2.79442200 | 0.01402100  | 0.15141800  |
| H  | -2.07490200 | 0.71382500  | -1.70539600 |
| C  | -3.47669200 | 2.17600600  | -0.97067200 |
| C  | -1.21286100 | 1.91075400  | 2.70818100  |
| C  | -2.06352300 | 3.85290800  | 1.55401600  |
| C  | -0.57384300 | 3.11196400  | -2.53825500 |
| C  | 0.22913300  | 4.41438100  | -0.67263700 |
| C  | 4.51499800  | -1.21419000 | 1.12451500  |
| C  | 2.65352800  | -1.04477400 | 2.69393400  |
| H  | 3.47822600  | 0.14213500  | -1.63538500 |
| N  | 4.72652200  | -0.84076200 | -0.19583200 |
| C  | -2.24193800 | -1.32166500 | 0.14257500  |
| C  | -3.74902000 | 0.07689700  | 1.21015800  |
| H  | -3.79682300 | 2.63591300  | -0.03302400 |
| H  | -4.35022300 | 1.69816900  | -1.42384400 |
| H  | -3.13699800 | 2.97360400  | -1.63504400 |
| H  | -0.67441000 | 0.96773100  | 2.67807100  |
| C  | -1.73402600 | 2.39139200  | 3.90923500  |
| C  | -2.57431000 | 4.34108100  | 2.75750500  |
| H  | -2.19500600 | 4.42869500  | 0.64443100  |
| H  | -1.02122800 | 2.20866800  | -2.94142500 |
| C  | -0.18497000 | 4.12620300  | -3.41345200 |
| C  | 0.61679600  | 5.42814800  | -1.54818700 |
| H  | 0.40482200  | 4.52993800  | 0.39217300  |
| C  | 5.32700300  | -1.86102800 | 2.05968000  |
| C  | 3.45717100  | -1.68907700 | 3.62854700  |
| H  | 1.64085300  | -0.72973000 | 2.92058600  |
| C  | 5.96571000  | -0.99214900 | -0.94824300 |
| P  | -1.00170800 | -1.82487900 | -1.07260100 |
| C  | -2.88039100 | -2.05848600 | 1.19889100  |
| H  | -4.35385900 | 0.93607200  | 1.45932800  |
| C  | -3.80436300 | -1.19400900 | 1.85060700  |
| H  | -1.60316100 | 1.81891400  | 4.82312200  |
| C  | -2.41448900 | 3.61024700  | 3.93664900  |
| H  | -3.10026600 | 5.29156000  | 2.77325200  |
| H  | -0.34664000 | 4.00480600  | -4.48088500 |

|    |             |             |             |
|----|-------------|-------------|-------------|
| C  | 0.40868200  | 5.29020600  | -2.92220600 |
| H  | 1.08399800  | 6.32697600  | -1.15538700 |
| C  | 4.77227500  | -2.09190700 | 3.31534900  |
| H  | 6.33963200  | -2.16952800 | 1.82244600  |
| H  | 3.06710700  | -1.88690400 | 4.62200700  |
| H  | 6.33846500  | -2.00774500 | -0.78632900 |
| H  | 5.72109400  | -0.89683000 | -2.00871200 |
| C  | 7.01202500  | 0.04507400  | -0.53665600 |
| O  | -1.47191300 | -1.81669500 | -2.51320600 |
| C  | -0.22099300 | -3.42461500 | -0.54791200 |
| H  | 0.05015700  | -0.86474600 | -0.79088700 |
| H  | -2.72472200 | -3.09861800 | 1.43800900  |
| H  | -4.46592300 | -1.46902200 | 2.66050000  |
| H  | -2.81426400 | 3.99132400  | 4.87197100  |
| H  | 0.70998800  | 6.08037600  | -3.60361500 |
| H  | 5.36750800  | -2.59193400 | 4.07311600  |
| H  | 6.59774800  | 1.04904300  | -0.70224600 |
| H  | 7.17776700  | -0.02269800 | 0.54681700  |
| C  | 8.34361700  | -0.06172600 | -1.24311500 |
| C  | -1.20440800 | -4.58718200 | -0.74695800 |
| C  | 0.28025600  | -3.33018400 | 0.90026300  |
| C  | 0.98398100  | -3.60063800 | -1.49257200 |
| C  | 9.36147300  | 0.96173800  | -0.81127500 |
| C  | 8.61706400  | -0.97841400 | -2.17726500 |
| H  | -2.08202400 | -4.50207900 | -0.10107000 |
| H  | -0.70907000 | -5.53794900 | -0.51585500 |
| H  | -1.55293300 | -4.62933200 | -1.78300300 |
| H  | 0.88365200  | -2.43092900 | 1.05141300  |
| H  | 0.91281400  | -4.19624700 | 1.12948000  |
| H  | -0.53536500 | -3.31127100 | 1.62560800  |
| H  | 0.67067700  | -3.61239900 | -2.54003300 |
| H  | 1.49197100  | -4.54677400 | -1.27210400 |
| H  | 1.70853200  | -2.79015500 | -1.36072900 |
| H  | 10.30520200 | 0.84629900  | -1.35054000 |
| H  | 8.99088800  | 1.98056300  | -0.98208400 |
| H  | 9.56813200  | 0.88150300  | 0.26369200  |
| H  | 9.59104200  | -1.01284800 | -2.65740100 |
| H  | 7.89840100  | -1.72299400 | -2.50399100 |
| Fe | -4.27171600 | -1.40019000 | -0.16116000 |
| C  | -6.18201600 | -2.18337500 | -0.31818800 |
| C  | -5.23678000 | -3.06264200 | -0.93200600 |
| C  | -6.10788100 | -0.92315400 | -0.98569300 |
| H  | -6.81471200 | -2.41845600 | 0.52678000  |
| H  | -5.02776500 | -4.07949900 | -0.62932200 |

|   |             |             |             |
|---|-------------|-------------|-------------|
| C | -4.57752000 | -2.34647800 | -1.97560800 |
| C | -5.11495800 | -1.02551700 | -2.00787300 |
| H | -6.67222500 | -0.03629200 | -0.73177100 |
| H | -3.74153400 | -2.68785600 | -2.56812200 |
| H | -4.78714200 | -0.23134400 | -2.66307900 |

**c2-2**

|    |             |             |             |
|----|-------------|-------------|-------------|
| Ni | 0.66866800  | 1.23253300  | -0.02008800 |
| P  | -1.32350300 | 1.85516900  | 0.08108800  |
| N  | 2.55697200  | 1.02233900  | -0.11558800 |
| C  | -2.68566800 | 0.60661000  | -0.37881900 |
| C  | -1.93343300 | 2.43751000  | 1.72020500  |
| C  | -1.66833800 | 3.25729900  | -1.06229500 |
| C  | 3.25246700  | 0.73386400  | -1.29232400 |
| C  | 3.47375800  | 1.08095700  | 0.83832000  |
| C  | -2.47840900 | -0.57631900 | 0.51754600  |
| H  | -2.42967700 | 0.29651700  | -1.39636200 |
| C  | -4.11206000 | 1.15240700  | -0.35583600 |
| C  | -1.32598200 | 1.88061000  | 2.85557600  |
| C  | -3.00344200 | 3.32799200  | 1.89672800  |
| C  | -2.00691800 | 3.00758300  | -2.40188200 |
| C  | -1.45846000 | 4.58623600  | -0.66142800 |
| C  | 4.62689400  | 0.60702500  | -0.99408200 |
| C  | 2.78777300  | 0.57315200  | -2.60138200 |
| H  | 3.27921200  | 1.29568800  | 1.87785400  |
| N  | 4.73526700  | 0.84064100  | 0.37092100  |
| C  | -1.47651500 | -1.60209000 | 0.33859700  |
| C  | -3.15440100 | -0.84434500 | 1.74478300  |
| H  | -4.41049700 | 1.46371300  | 0.64766100  |
| H  | -4.81298300 | 0.38125100  | -0.68951400 |
| H  | -4.21286100 | 2.01542000  | -1.01853900 |
| H  | -0.49099500 | 1.19940700  | 2.71536000  |
| C  | -1.78288300 | 2.19323200  | 4.13592700  |
| C  | -3.45309500 | 3.65153700  | 3.17767500  |
| H  | -3.48133900 | 3.77733000  | 1.03303700  |
| H  | -2.14812100 | 1.98826900  | -2.74781700 |
| C  | -2.15463900 | 4.05837200  | -3.30753600 |
| C  | -1.60694500 | 5.63586000  | -1.56734400 |
| H  | -1.17763500 | 4.80045400  | 0.36481400  |
| C  | 5.57498000  | 0.31069000  | -1.97687700 |
| C  | 3.72844400  | 0.27807500  | -3.58341800 |
| H  | 1.73078800  | 0.67467300  | -2.82304900 |
| C  | 5.95448800  | 0.75666800  | 1.16454300  |
| P  | -0.41716400 | -1.63230800 | -1.12548800 |



|   |             |             |             |
|---|-------------|-------------|-------------|
| C | -1.55941000 | -2.48604600 | 1.46904400  |
| H | -3.97868300 | -0.27328100 | 2.14563100  |
| C | -2.59452500 | -2.01761200 | 2.32613400  |
| H | -1.30477500 | 1.74900500  | 5.00443000  |
| C | -2.84762200 | 3.08153200  | 4.29958800  |
| H | -4.27900200 | 4.34684900  | 3.29906200  |
| H | -2.42192700 | 3.84408400  | -4.33847200 |
| C | -1.95918600 | 5.37694800  | -2.89354000 |
| H | -1.44516700 | 6.65791300  | -1.23614200 |
| C | 5.09868100  | 0.14802300  | -3.27515100 |
| H | 6.63040000  | 0.21397200  | -1.74517700 |
| H | 3.40200800  | 0.14259300  | -4.60955200 |
| H | 6.74697300  | 1.28054100  | 0.62263400  |
| H | 5.78122900  | 1.29755800  | 2.09769400  |
| C | 6.35182900  | -0.69422600 | 1.44139800  |
| O | -1.17541500 | -1.57593700 | -2.43553600 |
| C | 0.78362500  | -3.04309800 | -1.00004100 |
| H | 0.41017500  | -0.46691100 | -0.88914700 |
| H | -0.97551100 | -3.37819300 | 1.63023700  |
| H | -2.92753600 | -2.49735000 | 3.23622900  |
| H | -3.20074100 | 3.33277200  | 5.29567000  |
| H | -2.07489800 | 6.19471200  | -3.59877600 |
| H | 5.80028000  | -0.08280400 | -4.07073000 |
| H | 5.53447900  | -1.18676000 | 1.98607900  |
| H | 6.42695800  | -1.23263300 | 0.48708100  |
| C | 7.63940600  | -0.87921500 | 2.21052300  |
| C | 0.04173100  | -4.38855600 | -0.98799100 |
| C | 1.67282800  | -2.86348000 | 0.24076800  |
| C | 1.65600600  | -2.96014400 | -2.26695800 |
| C | 8.01062500  | -2.31659200 | 2.46758900  |
| C | 8.40162600  | 0.13360900  | 2.63588200  |
| H | -0.60919400 | -4.50151700 | -0.11927500 |
| H | 0.76927400  | -5.20919000 | -0.97516800 |
| H | -0.57318200 | -4.50196600 | -1.88551700 |
| H | 2.16136600  | -1.88429100 | 0.23408100  |
| H | 2.45644200  | -3.63077800 | 0.24473700  |
| H | 1.11588500  | -2.95051600 | 1.17611900  |
| H | 1.04731800  | -3.03031400 | -3.17210500 |
| H | 2.37706200  | -3.78610800 | -2.26832300 |
| H | 2.21848200  | -2.02331400 | -2.30899000 |
| H | 8.94577700  | -2.39916600 | 3.02754200  |
| H | 7.22424400  | -2.83019300 | 3.03544000  |
| H | 8.12529600  | -2.86753300 | 1.52524300  |
| H | 9.32058100  | -0.05185000 | 3.18501800  |

|    |             |             |             |
|----|-------------|-------------|-------------|
| H  | 8.15240900  | 1.17565200  | 2.46224700  |
| Fe | -3.33891900 | -2.45355500 | 0.43757000  |
| C  | -4.82540400 | -3.88132900 | 0.63925800  |
| C  | -3.76058400 | -4.38971600 | -0.16690800 |
| C  | -5.34393600 | -2.71539900 | -0.00163100 |
| H  | -5.15372600 | -4.28426200 | 1.58753300  |
| H  | -3.14181900 | -5.24551300 | 0.06450000  |
| C  | -3.62064700 | -3.53733500 | -1.30301300 |
| C  | -4.59782000 | -2.50374100 | -1.20088200 |
| H  | -6.13429800 | -2.08246400 | 0.37751900  |
| H  | -2.86546000 | -3.60156500 | -2.07214000 |
| H  | -4.71878400 | -1.68398700 | -1.89452800 |

**c3**

|    |             |             |             |
|----|-------------|-------------|-------------|
| Ni | 0.50491000  | -0.26902400 | -0.59249200 |
| Fe | -4.90157500 | -1.70290900 | 0.47071600  |
| P  | -3.01590000 | 0.21516500  | -1.68477000 |
| P  | -0.60047100 | 0.28442300  | 1.25626500  |
| O  | -3.56129500 | 1.49625200  | -1.08522300 |
| C  | -3.22881700 | -1.22519100 | -0.62053600 |
| C  | -2.92804500 | -1.17781900 | 0.79369600  |
| C  | -3.16624300 | -2.47800200 | 1.32591000  |
| H  | -3.07416100 | -2.75410900 | 2.36634300  |
| C  | -3.61752400 | -3.32631100 | 0.27373100  |
| H  | -3.92490500 | -4.35787400 | 0.37571500  |
| C  | -3.65692600 | -2.56248200 | -0.92540200 |
| H  | -3.99621300 | -2.92412400 | -1.88300600 |
| C  | -2.46278200 | 0.03462000  | 1.53997100  |
| H  | -2.91390400 | 0.89485200  | 1.04290700  |
| C  | -2.86967700 | 0.05158800  | 3.01315900  |
| H  | -2.42738700 | -0.77459000 | 3.57420500  |
| H  | -3.95620600 | -0.02499800 | 3.10116600  |
| H  | -2.55454500 | 0.98527800  | 3.48685500  |
| C  | -6.40941900 | -0.37715800 | -0.03411900 |
| H  | -6.27937300 | 0.40009800  | -0.77134000 |
| C  | -6.09153100 | -0.25635400 | 1.35006100  |
| H  | -5.70288500 | 0.63172100  | 1.82749600  |
| C  | -6.31834200 | -1.52323500 | 1.96878500  |
| H  | -6.13203900 | -1.76769900 | 3.00541800  |
| C  | -6.77874700 | -2.42757800 | 0.96426500  |
| H  | -7.00401700 | -3.47527500 | 1.10826000  |
| C  | -6.83528800 | -1.71835500 | -0.27474500 |
| H  | -7.11536900 | -2.13551100 | -1.23186200 |
| C  | 0.14828900  | -0.60735100 | 2.68718400  |

|   |             |             |             |
|---|-------------|-------------|-------------|
| C | 0.67893100  | -1.87989200 | 2.42007600  |
| H | 0.62321700  | -2.26301400 | 1.40772100  |
| C | 1.27290700  | -2.63674300 | 3.43064600  |
| H | 1.68083400  | -3.61711700 | 3.20170000  |
| C | 1.34986200  | -2.12918200 | 4.72834400  |
| H | 1.82215200  | -2.70984000 | 5.51525500  |
| C | 0.81220800  | -0.87162500 | 5.01119500  |
| H | 0.85888000  | -0.47472800 | 6.02127900  |
| C | 0.20937000  | -0.12016200 | 4.00225300  |
| H | -0.20888000 | 0.85019700  | 4.24171700  |
| C | -0.45818900 | 2.08359300  | 1.65510600  |
| C | -1.33302800 | 2.97700300  | 1.00770200  |
| H | -2.12209100 | 2.60643400  | 0.35735000  |
| C | -1.18705900 | 4.35526300  | 1.16773200  |
| H | -1.88170700 | 5.02526900  | 0.66842100  |
| C | -0.15848000 | 4.87321000  | 1.95833800  |
| H | -0.04834600 | 5.94678600  | 2.08113000  |
| C | 0.73215400  | 3.99748800  | 2.57902400  |
| H | 1.55042300  | 4.38180800  | 3.18126600  |
| C | 0.58489900  | 2.61771800  | 2.42709700  |
| H | 1.30028300  | 1.96157500  | 2.90509600  |
| C | -3.62485700 | -0.11224200 | -3.40919400 |
| C | -5.14310400 | -0.34237300 | -3.40404900 |
| H | -5.41884600 | -1.22941000 | -2.82914100 |
| H | -5.49495100 | -0.48134100 | -4.43301000 |
| H | -5.67218400 | 0.51722400  | -2.98401400 |
| C | -2.89407300 | -1.29727100 | -4.05893600 |
| H | -1.80970700 | -1.16637000 | -4.04707700 |
| H | -3.20424000 | -1.37708900 | -5.10748300 |
| H | -3.11965900 | -2.24926300 | -3.57644300 |
| C | -3.29787000 | 1.17610900  | -4.18986100 |
| H | -3.78117400 | 2.04712000  | -3.74070100 |
| H | -3.64787000 | 1.07686300  | -5.22349100 |
| H | -2.21814900 | 1.36328900  | -4.22053300 |
| H | -1.60707800 | 0.25261600  | -1.85925300 |
| C | 4.91620200  | -4.02098300 | -0.78048300 |
| C | 6.28513100  | -3.89657800 | -0.42919100 |
| C | 7.17799800  | -4.93039600 | -0.73980900 |
| C | 6.67793200  | -6.05320300 | -1.39240600 |
| C | 5.31397900  | -6.15850800 | -1.73558400 |
| C | 4.40756500  | -5.14416000 | -1.43715400 |
| C | 5.32005000  | -2.10707600 | 0.24415200  |
| H | 8.22716500  | -4.84665600 | -0.47423600 |
| H | 7.34964500  | -6.86806600 | -1.64578900 |

|   |             |             |             |
|---|-------------|-------------|-------------|
| H | 4.96310300  | -7.05017800 | -2.24661300 |
| H | 3.35914500  | -5.22416800 | -1.70639600 |
| H | 5.10125800  | -1.13660900 | 0.67073100  |
| N | 4.32017100  | -2.85613800 | -0.32781000 |
| N | 6.50196300  | -2.68259400 | 0.21175100  |
| C | 2.92039400  | -2.47786000 | -0.48200200 |
| H | 2.31260400  | -3.36305900 | -0.27648900 |
| H | 2.68669500  | -1.74020000 | 0.28603600  |
| C | 2.61218300  | -1.90286500 | -1.86444200 |
| H | 3.30289800  | -1.06792300 | -2.04179500 |
| H | 2.85964200  | -2.66369400 | -2.62320800 |
| C | 0.99634600  | -0.76046600 | -3.41365900 |
| H | 0.00223700  | -0.31840100 | -3.52160200 |
| H | 1.72950700  | 0.04116700  | -3.57051400 |
| H | 1.13092700  | -1.47802900 | -4.23991500 |
| C | 1.18316300  | -1.41593000 | -2.05734000 |
| C | 0.07609100  | -2.02660600 | -1.39496300 |
| H | -0.89335500 | -2.04818000 | -1.88650300 |
| H | 0.22481400  | -2.87915400 | -0.73263900 |
| C | 3.32039500  | 2.84090700  | -0.05195400 |
| C | 2.76232500  | 1.57838000  | 0.25110500  |
| C | 3.21832000  | 0.84890600  | 1.35398300  |
| C | 4.23580100  | 1.40617900  | 2.12261000  |
| C | 4.78860900  | 2.66503100  | 1.80736600  |
| C | 4.33884800  | 3.40718500  | 0.71857800  |
| C | 1.69942900  | 2.34028600  | -1.47350100 |
| H | 2.75968600  | -0.09596900 | 1.61815100  |
| H | 4.60509800  | 0.86682600  | 2.98913700  |
| H | 5.58076400  | 3.06673900  | 2.43132800  |
| H | 4.75854600  | 4.38006800  | 0.48613500  |
| H | 1.01465600  | 2.45179000  | -2.30083900 |
| N | 2.62611000  | 3.29737700  | -1.16370900 |
| N | 1.74636600  | 1.30085600  | -0.66054800 |
| C | 2.72578300  | 4.62549300  | -1.75669200 |
| H | 3.78576500  | 4.87982500  | -1.84388900 |
| H | 2.31673100  | 4.57024200  | -2.76846200 |
| C | 1.97457700  | 5.66069500  | -0.91829300 |
| H | 0.92563000  | 5.34868300  | -0.83395600 |
| H | 2.35682200  | 5.63003100  | 0.11034000  |
| C | 1.26051800  | 8.06626400  | -0.57851400 |
| H | 1.32832800  | 9.08232000  | -0.97597200 |
| H | 0.19988500  | 7.78944000  | -0.52286100 |
| H | 1.63537300  | 8.07586500  | 0.45310400  |
| C | 2.02952500  | 7.08234500  | -1.42201300 |

|   |            |            |             |
|---|------------|------------|-------------|
| C | 2.69376300 | 7.45955600 | -2.51937700 |
| H | 2.70065700 | 8.49780800 | -2.83953700 |
| H | 3.25173300 | 6.76549000 | -3.14009100 |

**c3-2**

|    |             |             |             |
|----|-------------|-------------|-------------|
| Ni | -0.31587500 | 0.12470000  | -1.12085800 |
| Fe | 5.29421200  | 0.21687300  | 0.44820800  |
| P  | 2.86804600  | -1.71034100 | -0.95190600 |
| P  | 0.54141400  | 0.91049800  | 0.78456600  |
| O  | 2.83236300  | -2.55539000 | 0.30581600  |
| C  | 3.63429500  | -0.09756700 | -0.71535700 |
| C  | 3.29639400  | 0.75735500  | 0.40172300  |
| C  | 4.11245700  | 1.92380400  | 0.30432200  |
| H  | 4.12044900  | 2.74178800  | 1.00819600  |
| C  | 4.94569800  | 1.80736800  | -0.84450300 |
| H  | 5.70163600  | 2.51464100  | -1.15625800 |
| C  | 4.65508900  | 0.56776800  | -1.47754800 |
| H  | 5.15550800  | 0.18122500  | -2.35101900 |
| C  | 2.26754800  | 0.47621100  | 1.45854300  |
| H  | 2.23901900  | -0.60785900 | 1.59882100  |
| C  | 2.58046900  | 1.16981600  | 2.78797800  |
| H  | 2.58554000  | 2.25711400  | 2.68273500  |
| H  | 3.56442900  | 0.86261500  | 3.15168200  |
| H  | 1.83921100  | 0.91796500  | 3.54843300  |
| C  | 6.98541400  | -0.97932300 | 0.36899500  |
| H  | 7.43118200  | -1.34605300 | -0.54471900 |
| C  | 5.95862000  | -1.62492200 | 1.12187400  |
| H  | 5.45100300  | -2.54392500 | 0.87074700  |
| C  | 5.62858100  | -0.78573500 | 2.22562100  |
| H  | 4.85987000  | -0.98906200 | 2.95668000  |
| C  | 6.44821700  | 0.38188500  | 2.15721900  |
| H  | 6.40857900  | 1.22859000  | 2.82860200  |
| C  | 7.28771600  | 0.26201000  | 1.00833600  |
| H  | 7.99698100  | 1.00056600  | 0.66084300  |
| C  | 0.64612300  | 2.75024800  | 0.84396600  |
| C  | 1.23346700  | 3.38488800  | -0.26412900 |
| H  | 1.55695000  | 2.78447000  | -1.10641700 |
| C  | 1.39446000  | 4.77016200  | -0.28997300 |
| H  | 1.85463000  | 5.24290000  | -1.15312500 |
| C  | 0.95613400  | 5.54595900  | 0.78553300  |
| H  | 1.06764900  | 6.62605500  | 0.76175900  |
| C  | 0.37186200  | 4.92531500  | 1.89019500  |
| H  | 0.02845200  | 5.52100400  | 2.73104300  |
| C  | 0.22560500  | 3.53758900  | 1.92433300  |

|   |             |             |             |
|---|-------------|-------------|-------------|
| H | -0.22184300 | 3.07012000  | 2.79357700  |
| C | -0.54452700 | 0.44635900  | 2.20015400  |
| C | -0.23515700 | -0.64401000 | 3.02874000  |
| H | 0.71195300  | -1.16055000 | 2.92773900  |
| C | -1.14865200 | -1.10537500 | 3.97643000  |
| H | -0.88891300 | -1.95681000 | 4.59780200  |
| C | -2.39352600 | -0.49040900 | 4.11044800  |
| H | -3.10601500 | -0.85248700 | 4.84619000  |
| C | -2.71654700 | 0.58903500  | 3.28632800  |
| H | -3.68359200 | 1.07610700  | 3.37745900  |
| C | -1.80604800 | 1.05054900  | 2.33525200  |
| H | -2.08587700 | 1.88124700  | 1.69540600  |
| C | 3.59198800  | -2.59660400 | -2.41482800 |
| C | 5.07195300  | -2.92262400 | -2.16355500 |
| H | 5.68150200  | -2.02089200 | -2.07710600 |
| H | 5.46062000  | -3.51543700 | -2.99985800 |
| H | 5.19870400  | -3.51022200 | -1.25031700 |
| C | 3.41967700  | -1.79262200 | -3.71353800 |
| H | 2.37448300  | -1.53815100 | -3.90233900 |
| H | 3.76793500  | -2.39871200 | -4.55832900 |
| H | 3.99426600  | -0.86453200 | -3.71699400 |
| C | 2.78871800  | -3.90946700 | -2.51142000 |
| H | 2.87442800  | -4.49346900 | -1.59187200 |
| H | 3.17100600  | -4.51087000 | -3.34392100 |
| H | 1.72542600  | -3.72196400 | -2.69566800 |
| H | 1.56716800  | -1.36136900 | -1.40207000 |
| C | -4.11519900 | 2.10732900  | -1.70684900 |
| C | -4.21590500 | 2.57686200  | -0.37002300 |
| C | -5.40422200 | 2.38723500  | 0.34752700  |
| C | -6.45628600 | 1.73167200  | -0.28787200 |
| C | -6.34043500 | 1.27255400  | -1.61667100 |
| C | -5.17005300 | 1.45414000  | -2.35148100 |
| C | -2.22575700 | 3.03417000  | -1.03089400 |
| H | -5.49020800 | 2.74323600  | 1.36939000  |
| H | -7.38326600 | 1.55633000  | 0.24830300  |
| H | -7.18334700 | 0.76562800  | -2.07616000 |
| H | -5.08267000 | 1.09385800  | -3.37094200 |
| H | -1.19629200 | 3.35714600  | -1.07692800 |
| N | -2.82102900 | 2.41258400  | -2.09934200 |
| N | -3.01344800 | 3.15300400  | 0.01849200  |
| C | -2.22884700 | 2.13508000  | -3.40369100 |
| H | -2.93834200 | 2.48762400  | -4.15953300 |
| H | -1.33361200 | 2.75310400  | -3.49282700 |
| C | -1.90851100 | 0.65901900  | -3.65777600 |

|   |             |             |             |
|---|-------------|-------------|-------------|
| H | -2.77164800 | 0.05535000  | -3.34759000 |
| H | -1.86171600 | 0.54792800  | -4.75497200 |
| C | -0.45171500 | -1.35939300 | -3.58331900 |
| H | 0.42163900  | -1.84725200 | -3.14820900 |
| H | -1.32134500 | -1.97995600 | -3.33209200 |
| H | -0.33920100 | -1.39099700 | -4.68095700 |
| C | -0.63102900 | 0.06166000  | -3.07358000 |
| C | 0.50403800  | 0.86756200  | -2.74855800 |
| H | 1.50943300  | 0.47762700  | -2.90440700 |
| H | 0.45424300  | 1.95045000  | -2.85827800 |
| C | -2.75937000 | -2.55521600 | 1.07249600  |
| C | -1.52981700 | -2.23472200 | 0.44809000  |
| C | -0.38374900 | -2.98974700 | 0.71228300  |
| C | -0.50888900 | -4.05786800 | 1.59537500  |
| C | -1.73907300 | -4.37346100 | 2.20666100  |
| C | -2.88827300 | -3.62704900 | 1.95668400  |
| C | -2.97633400 | -0.75784100 | -0.19871300 |
| H | 0.58033100  | -2.74109300 | 0.28516100  |
| H | 0.36867300  | -4.65433900 | 1.82492500  |
| H | -1.79252800 | -5.21518500 | 2.89067500  |
| H | -3.83319500 | -3.86367300 | 2.43463500  |
| H | -3.44730100 | 0.09388600  | -0.65999100 |
| N | -3.65831900 | -1.58934900 | 0.64102500  |
| N | -1.70697900 | -1.09490000 | -0.33648900 |
| C | -5.05517000 | -1.44046300 | 1.02585400  |
| H | -5.16260100 | -1.82579000 | 2.04253500  |
| H | -5.27614500 | -0.37185600 | 1.05033100  |
| C | -6.00055600 | -2.15458500 | 0.06068800  |
| H | -5.82455100 | -1.76477700 | -0.95099400 |
| H | -5.73782200 | -3.22044300 | 0.01552500  |
| C | -8.38564800 | -2.72595900 | -0.58849100 |
| H | -9.43738900 | -2.60260700 | -0.31700700 |
| H | -8.24776400 | -2.34392400 | -1.60837600 |
| H | -8.16408900 | -3.80023600 | -0.62606500 |
| C | -7.47133300 | -2.01836500 | 0.37752600  |
| C | -7.94677200 | -1.32078400 | 1.41493000  |
| H | -9.01563800 | -1.24980200 | 1.59728300  |
| H | -7.30612300 | -0.80013600 | 2.11922200  |

**c3-3**

|    |             |             |             |
|----|-------------|-------------|-------------|
| Ni | 0.58555200  | -0.51616500 | -1.06525600 |
| Fe | -5.11127400 | -1.30449500 | -0.29671600 |
| P  | -3.03323900 | 1.42687300  | -0.16740100 |
| P  | -0.40105600 | -1.41507300 | 0.69392200  |

|   |             |             |             |
|---|-------------|-------------|-------------|
| O | -3.22295000 | 1.57200000  | 1.32780700  |
| C | -3.44716800 | -0.21078300 | -0.80069400 |
| C | -3.05017900 | -1.42332700 | -0.11996100 |
| C | -3.52816500 | -2.52231700 | -0.89078400 |
| H | -3.42764400 | -3.56433600 | -0.62356600 |
| C | -4.21483800 | -2.01573500 | -2.03182800 |
| H | -4.72740200 | -2.60464800 | -2.77986500 |
| C | -4.16604100 | -0.59551500 | -1.98403500 |
| H | -4.62657800 | 0.06760100  | -2.69915600 |
| C | -2.24492000 | -1.48934600 | 1.14049700  |
| H | -2.42582900 | -0.55835100 | 1.67967100  |
| C | -2.60547500 | -2.65844600 | 2.05741500  |
| H | -2.43990300 | -3.62641700 | 1.57914900  |
| H | -3.65770100 | -2.59878000 | 2.34358300  |
| H | -2.00293000 | -2.62918800 | 2.96938600  |
| C | -7.06408600 | -0.60441000 | -0.29698300 |
| H | -7.49310900 | 0.00332300  | -1.08140200 |
| C | -6.36946500 | -0.12468500 | 0.85363800  |
| H | -6.15953500 | 0.90527100  | 1.09639000  |
| C | -5.92860300 | -1.25144100 | 1.60625100  |
| H | -5.34605900 | -1.20536300 | 2.51431000  |
| C | -6.34715800 | -2.43214400 | 0.92131600  |
| H | -6.13227400 | -3.44984500 | 1.21660900  |
| C | -7.04952100 | -2.03235700 | -0.25595300 |
| H | -7.46035200 | -2.69441200 | -1.00564400 |
| C | 0.07212300  | -3.19581900 | 0.62237200  |
| C | 0.19054800  | -3.75398900 | -0.66176900 |
| H | 0.01855800  | -3.11619200 | -1.52470600 |
| C | 0.53217600  | -5.09677700 | -0.82953800 |
| H | 0.61489000  | -5.51235000 | -1.82993800 |
| C | 0.77088100  | -5.90079300 | 0.28646000  |
| H | 1.04385800  | -6.94442900 | 0.15940000  |
| C | 0.65574600  | -5.35792700 | 1.56807300  |
| H | 0.83618800  | -5.97952600 | 2.44052800  |
| C | 0.30303000  | -4.01829800 | 1.73541300  |
| H | 0.20950900  | -3.61218600 | 2.73624500  |
| C | 0.30950900  | -0.76785400 | 2.26584000  |
| C | -0.26460500 | 0.37648300  | 2.84910800  |
| H | -1.19009500 | 0.79506600  | 2.46158300  |
| C | 0.35937400  | 1.01470200  | 3.92080000  |
| H | -0.09743600 | 1.90066100  | 4.35212300  |
| C | 1.56601200  | 0.53051100  | 4.42814400  |
| H | 2.05417400  | 1.03567200  | 5.25616700  |
| C | 2.14786100  | -0.59835000 | 3.85160900  |



|   |             |             |             |
|---|-------------|-------------|-------------|
| H | 3.09717800  | -0.97299600 | 4.22332800  |
| C | 1.52976500  | -1.23684300 | 2.77719500  |
| H | 2.01237900  | -2.09409400 | 2.32292500  |
| C | -3.83902500 | 2.76942800  | -1.16966200 |
| C | -5.36915400 | 2.65753700  | -1.11013400 |
| H | -5.73285700 | 1.71950700  | -1.53371300 |
| H | -5.81494100 | 3.48306800  | -1.67694100 |
| H | -5.72889200 | 2.73042700  | -0.08071800 |
| C | -3.34226500 | 2.74569600  | -2.62345300 |
| H | -2.25494300 | 2.84770400  | -2.67888600 |
| H | -3.77733100 | 3.59286200  | -3.16621700 |
| H | -3.61821800 | 1.83383700  | -3.15584100 |
| C | -3.39795800 | 4.08814100  | -0.50427300 |
| H | -3.70642000 | 4.12828900  | 0.54311700  |
| H | -3.85431400 | 4.93160000  | -1.03458800 |
| H | -2.31215200 | 4.22239500  | -0.54072600 |
| H | -1.67999600 | 1.56405200  | -0.54841900 |
| C | 1.21900700  | 4.27599600  | -0.13851900 |
| C | 2.18780400  | 5.30400000  | -0.01878800 |
| C | 2.20911400  | 6.10583500  | 1.12982500  |
| C | 1.26439000  | 5.85571600  | 2.12185700  |
| C | 0.30837600  | 4.82778300  | 1.98535200  |
| C | 0.26657100  | 4.01909200  | 0.85205100  |
| C | 2.56743000  | 4.32281800  | -1.88578500 |
| H | 2.94878000  | 6.89328800  | 1.23494900  |
| H | 1.26066900  | 6.46331400  | 3.02193800  |
| H | -0.41321900 | 4.66045300  | 2.77901700  |
| H | -0.46614300 | 3.22482400  | 0.76074500  |
| H | 2.98149000  | 4.02793400  | -2.83977100 |
| N | 1.49485400  | 3.65554900  | -1.34554200 |
| N | 3.01477000  | 5.30684800  | -1.13557500 |
| C | 0.74385700  | 2.52635900  | -1.88240700 |
| H | 0.39192500  | 1.94771100  | -1.02355800 |
| H | -0.14122400 | 2.89982000  | -2.40804700 |
| C | 1.55237200  | 1.59057800  | -2.78165200 |
| H | 1.66254400  | 2.03819100  | -3.78371600 |
| H | 2.56578000  | 1.49940400  | -2.37138900 |
| C | 1.75445500  | -0.74087100 | -3.74938200 |
| H | 1.32554500  | -1.74855800 | -3.76167500 |
| H | 1.79905400  | -0.39080800 | -4.79383100 |
| H | 2.79207100  | -0.82200800 | -3.39982000 |
| C | 0.94335000  | 0.19543000  | -2.87723200 |
| C | -0.44921300 | -0.04439900 | -2.67846600 |
| H | -0.90583700 | -0.91265800 | -3.15480600 |

|   |             |             |             |
|---|-------------|-------------|-------------|
| H | -1.14654200 | 0.77676400  | -2.53860200 |
| C | 4.44226900  | -0.17295400 | 0.67531300  |
| C | 3.11888200  | 0.26352800  | 0.44446100  |
| C | 2.65328500  | 1.45035500  | 1.01236200  |
| C | 3.53878900  | 2.19009500  | 1.78497900  |
| C | 4.86277100  | 1.75322300  | 1.99962700  |
| C | 5.33928700  | 0.56313500  | 1.45482500  |
| C | 3.34209600  | -1.63161500 | -0.58079500 |
| H | 1.62781900  | 1.76067300  | 0.87783200  |
| H | 3.20104300  | 3.11886600  | 2.23217800  |
| H | 5.52722800  | 2.35852300  | 2.60857500  |
| H | 6.35627500  | 0.22794600  | 1.62974900  |
| H | 3.15230500  | -2.52259300 | -1.16056100 |
| N | 4.55080900  | -1.39170300 | 0.01524900  |
| N | 2.46107200  | -0.67523600 | -0.34879900 |
| C | 5.75186500  | -2.20701000 | -0.10304600 |
| H | 6.22109400  | -2.26378500 | 0.88341200  |
| H | 5.44054100  | -3.21797500 | -0.37708500 |
| C | 6.72517600  | -1.63749900 | -1.13632100 |
| H | 6.21274100  | -1.57719800 | -2.10646000 |
| H | 6.96066700  | -0.59821600 | -0.87058500 |
| C | 8.95352100  | -1.81976200 | -2.33361400 |
| H | 9.87174600  | -2.40602400 | -2.42315200 |
| H | 8.47721900  | -1.77493600 | -3.32140400 |
| H | 9.22796700  | -0.78944600 | -2.07338500 |
| C | 8.01619300  | -2.40337100 | -1.30831000 |
| C | 8.32350100  | -3.50789000 | -0.62013000 |
| H | 9.26734600  | -4.02121400 | -0.78186000 |
| H | 7.66516200  | -3.94573300 | 0.12367400  |

**c3-4**

|    |             |             |             |
|----|-------------|-------------|-------------|
| Ni | 0.42495500  | 0.56416300  | -1.03859100 |
| Fe | -3.95271800 | -1.60904000 | 1.13558900  |
| P  | -4.58443300 | 1.06056400  | -0.86088600 |
| P  | -0.13368200 | 1.20497700  | 0.99257900  |
| O  | -5.27366400 | 1.70742400  | 0.31736500  |
| C  | -3.53277300 | -0.34008900 | -0.43521400 |
| C  | -2.48266100 | -0.21706700 | 0.54909900  |
| C  | -1.91433800 | -1.51274700 | 0.72347500  |
| H  | -1.13208900 | -1.76285900 | 1.42206400  |
| C  | -2.56686200 | -2.42421300 | -0.15588600 |
| H  | -2.36612800 | -3.48330100 | -0.23278700 |
| C  | -3.56739100 | -1.71004700 | -0.87213900 |
| H  | -4.25175400 | -2.14015200 | -1.58608700 |

|   |             |             |             |
|---|-------------|-------------|-------------|
| C | -2.01476600 | 1.09314000  | 1.14046700  |
| H | -2.33436000 | 1.86998500  | 0.44160100  |
| C | -2.60020400 | 1.45006700  | 2.50608900  |
| H | -2.34219300 | 0.70276500  | 3.25825200  |
| H | -3.68692300 | 1.51178800  | 2.41475800  |
| H | -2.22844800 | 2.42390400  | 2.83948100  |
| C | -5.88499000 | -2.29728200 | 1.40093100  |
| H | -6.56590400 | -2.50883300 | 0.58875200  |
| C | -5.72731700 | -1.03925100 | 2.05693700  |
| H | -6.22531800 | -0.11507600 | 1.80092300  |
| C | -4.70045800 | -1.18291500 | 3.03447200  |
| H | -4.33184300 | -0.40250900 | 3.68128500  |
| C | -4.21373900 | -2.52314700 | 2.97904300  |
| H | -3.40496000 | -2.93094600 | 3.56964500  |
| C | -4.94951500 | -3.21497700 | 1.97039200  |
| H | -4.79397500 | -4.23926400 | 1.66043100  |
| C | 0.46199500  | 0.39857100  | 2.54976900  |
| C | 1.04989300  | -0.87079900 | 2.43829300  |
| H | 1.15077400  | -1.31706600 | 1.45712300  |
| C | 1.49326300  | -1.56037100 | 3.56834900  |
| H | 1.94171000  | -2.54373700 | 3.45832700  |
| C | 1.36290200  | -0.98474700 | 4.83245400  |
| H | 1.71044200  | -1.51545300 | 5.71408900  |
| C | 0.78373300  | 0.28031300  | 4.95891400  |
| H | 0.67766900  | 0.73448100  | 5.94000500  |
| C | 0.33620000  | 0.96488600  | 3.82923800  |
| H | -0.10432400 | 1.94846300  | 3.94334100  |
| C | 0.16236900  | 2.99247100  | 1.33082300  |
| C | -0.64801000 | 3.97376200  | 0.73472900  |
| H | -1.51362300 | 3.68721600  | 0.14876700  |
| C | -0.35298500 | 5.32973900  | 0.87577700  |
| H | -1.00000400 | 6.06891400  | 0.41229700  |
| C | 0.76363000  | 5.73595300  | 1.60799800  |
| H | 0.99221100  | 6.79170000  | 1.71880000  |
| C | 1.58361700  | 4.77171200  | 2.19574400  |
| H | 2.45637800  | 5.07441200  | 2.76773000  |
| C | 1.28856500  | 3.41548000  | 2.05501700  |
| H | 1.94255100  | 2.68026600  | 2.50935800  |
| C | -5.70620500 | 0.62725400  | -2.26953500 |
| C | -6.72381600 | -0.43703100 | -1.83095700 |
| H | -6.25147300 | -1.39816000 | -1.61832300 |
| H | -7.45890600 | -0.59384500 | -2.62889800 |
| H | -7.26299300 | -0.11755500 | -0.93452000 |
| C | -4.88794000 | 0.16991600  | -3.48665200 |

|   |             |             |             |
|---|-------------|-------------|-------------|
| H | -4.13348000 | 0.91308700  | -3.76501600 |
| H | -5.55556500 | 0.04040900  | -4.34648200 |
| H | -4.37600000 | -0.77938400 | -3.31786900 |
| C | -6.44705100 | 1.93507500  | -2.61100800 |
| H | -7.01864700 | 2.30479900  | -1.75595200 |
| H | -7.13943500 | 1.75642200  | -3.44139500 |
| H | -5.75032400 | 2.72206700  | -2.92041900 |
| H | -3.67491400 | 1.93613300  | -1.50882300 |
| C | 3.92337400  | 1.87203800  | -1.58218400 |
| C | 5.08725800  | 1.06415600  | -1.48180300 |
| C | 5.89038200  | 1.12362100  | -0.33489200 |
| C | 5.50274700  | 1.98759200  | 0.68501000  |
| C | 4.33774100  | 2.77539300  | 0.57490900  |
| C | 3.52340900  | 2.73054200  | -0.55461800 |
| C | 4.16195000  | 0.57379200  | -3.35083500 |
| H | 6.77472300  | 0.50040700  | -0.24733000 |
| H | 6.10571200  | 2.05860400  | 1.58540200  |
| H | 4.06328100  | 3.43361500  | 1.39122700  |
| H | 2.61413900  | 3.31745000  | -0.61231700 |
| H | 3.93286500  | 0.14326900  | -4.31596600 |
| N | 3.34845100  | 1.53062300  | -2.79626300 |
| N | 5.19889900  | 0.25356300  | -2.60427800 |
| C | 2.23114800  | 2.20258700  | -3.46536500 |
| H | 1.84418700  | 2.94878300  | -2.77146100 |
| H | 2.64100300  | 2.74578400  | -4.32408700 |
| C | 1.11508400  | 1.26174100  | -3.93229900 |
| H | 0.66727800  | 1.72892800  | -4.82670000 |
| H | 1.56789600  | 0.32993200  | -4.29469100 |
| C | -0.97672000 | -0.06554800 | -3.55640900 |
| H | -1.77039000 | -0.33145500 | -2.85256100 |
| H | -1.45986300 | 0.34248200  | -4.46155100 |
| H | -0.47356100 | -0.99051400 | -3.86033100 |
| C | -0.00239800 | 0.93199700  | -2.95161300 |
| C | -0.52883600 | 1.91555400  | -2.05699200 |
| H | -1.60308900 | 1.92575900  | -1.87014900 |
| H | -0.07944700 | 2.90713700  | -1.98605900 |
| C | 2.66994000  | -3.03373700 | -1.21504000 |
| C | 1.46334800  | -2.31725700 | -1.40796200 |
| C | 0.34843300  | -2.94496800 | -1.97182300 |
| C | 0.47909100  | -4.27752900 | -2.34924800 |
| C | 1.69069100  | -4.97698500 | -2.17090300 |
| C | 2.80609000  | -4.36979500 | -1.60079000 |
| C | 2.86253700  | -0.96242100 | -0.46211100 |
| H | -0.57933900 | -2.40254900 | -2.09392200 |

|   |             |             |             |
|---|-------------|-------------|-------------|
| H | -0.36822000 | -4.79231600 | -2.79205700 |
| H | 1.75526100  | -6.01485100 | -2.48299500 |
| H | 3.73458100  | -4.91404300 | -1.46369600 |
| H | 3.30503800  | -0.09290900 | -0.00793300 |
| N | 3.53912700  | -2.13975400 | -0.60376500 |
| N | 1.62809100  | -1.01779700 | -0.93268300 |
| C | 4.95287000  | -2.34394300 | -0.29200200 |
| H | 5.17977300  | -3.39531300 | -0.47732600 |
| H | 5.54249200  | -1.74276800 | -0.98946000 |
| C | 5.26324700  | -1.98313300 | 1.15969800  |
| H | 4.93112000  | -0.95681000 | 1.35851300  |
| H | 4.66358600  | -2.62125400 | 1.82342200  |
| C | 6.99542500  | -1.71983500 | 2.98930300  |
| H | 8.06009900  | -1.78977600 | 3.22692400  |
| H | 6.66085100  | -0.69743100 | 3.20735200  |
| H | 6.44617800  | -2.37954300 | 3.67329400  |
| C | 6.71820000  | -2.07803600 | 1.55235500  |
| C | 7.69644600  | -2.42628100 | 0.70943500  |
| H | 8.73025900  | -2.46840800 | 1.04120500  |
| H | 7.51683500  | -2.68055200 | -0.32998900 |

#### c4

|    |             |             |             |
|----|-------------|-------------|-------------|
| Ni | -1.03339200 | -0.11996800 | 1.70344400  |
| Fe | 3.41139800  | -1.69053300 | -2.05126800 |
| P  | 0.80433800  | 0.52550700  | -1.86433700 |
| P  | -0.30721200 | -2.07235100 | 0.98286900  |
| O  | -0.01936600 | -0.31251500 | -2.81817500 |
| C  | 2.14285400  | -0.39890300 | -1.08284700 |
| C  | 1.96184000  | -1.74300100 | -0.57560800 |
| C  | 3.21610400  | -2.16684100 | -0.04044700 |
| H  | 3.42013200  | -3.13865600 | 0.38264300  |
| C  | 4.16317600  | -1.11542300 | -0.20461400 |
| H  | 5.21016400  | -1.15585400 | 0.06263200  |
| C  | 3.50928700  | -0.02573800 | -0.84435500 |
| H  | 3.97535100  | 0.90512600  | -1.12356100 |
| C  | 0.68189800  | -2.53218500 | -0.57475600 |
| H  | 0.07752600  | -2.16037100 | -1.40726200 |
| C  | 0.90598400  | -4.04054700 | -0.71519600 |
| H  | 1.52641300  | -4.43284600 | 0.09310100  |
| H  | 1.40568500  | -4.26150600 | -1.66104300 |
| H  | -0.04051500 | -4.58520900 | -0.69441000 |
| C  | 4.38297700  | -1.26113900 | -3.83191800 |
| H  | 4.85282300  | -0.31405900 | -4.05643100 |
| C  | 3.02114900  | -1.60539200 | -4.08518900 |

|   |             |             |             |
|---|-------------|-------------|-------------|
| H | 2.26060500  | -0.96677000 | -4.50697900 |
| C | 2.80218800  | -2.92656300 | -3.59882800 |
| H | 1.85918200  | -3.45238900 | -3.62244600 |
| C | 4.02648000  | -3.40233200 | -3.03886200 |
| H | 4.17608400  | -4.35527700 | -2.55027900 |
| C | 5.00472000  | -2.37226400 | -3.18412500 |
| H | 6.02472800  | -2.41052000 | -2.82719200 |
| C | 0.62497400  | -3.03713100 | 2.24373200  |
| C | 1.72056000  | -2.40195200 | 2.84909800  |
| H | 1.94408100  | -1.37313700 | 2.58864200  |
| C | 2.51433400  | -3.07593900 | 3.77614900  |
| H | 3.36082100  | -2.56976400 | 4.23135700  |
| C | 2.21255800  | -4.39356700 | 4.12722800  |
| H | 2.82226200  | -4.91700600 | 4.85789300  |
| C | 1.12004100  | -5.03252500 | 3.53862300  |
| H | 0.87935800  | -6.05742300 | 3.80663800  |
| C | 0.33581700  | -4.36192600 | 2.59810600  |
| H | -0.50321600 | -4.87364800 | 2.13925600  |
| C | -1.87700900 | -3.00883100 | 0.76403400  |
| C | -2.40353700 | -3.31366900 | -0.50162300 |
| H | -1.82028500 | -3.12957000 | -1.39698900 |
| C | -3.69452100 | -3.83324000 | -0.63246800 |
| H | -4.08098400 | -4.06291400 | -1.62145900 |
| C | -4.48167800 | -4.05688800 | 0.49728900  |
| H | -5.48462200 | -4.46027400 | 0.39484100  |
| C | -3.96807600 | -3.75916000 | 1.76299000  |
| H | -4.57139000 | -3.93086600 | 2.64985600  |
| C | -2.68408300 | -3.23491000 | 1.89460000  |
| H | -2.30170200 | -2.99193300 | 2.88052500  |
| C | 1.41079100  | 2.12736300  | -2.58215900 |
| C | 2.49781000  | 1.89629100  | -3.64076900 |
| H | 3.38839700  | 1.42179200  | -3.22510900 |
| H | 2.79578300  | 2.86099500  | -4.06771900 |
| H | 2.12696600  | 1.27220600  | -4.45802500 |
| C | 1.91818700  | 3.05194700  | -1.46508000 |
| H | 1.15343200  | 3.21622400  | -0.70269400 |
| H | 2.17005100  | 4.03124800  | -1.88742500 |
| H | 2.81074000  | 2.67055300  | -0.96859000 |
| C | 0.17298800  | 2.75517500  | -3.25361300 |
| H | -0.21765200 | 2.11000300  | -4.04427400 |
| H | 0.45243200  | 3.71879200  | -3.69520800 |
| H | -0.62886500 | 2.94068700  | -2.53464400 |
| H | 0.07976800  | 0.97373900  | -0.74084600 |
| C | 2.77999700  | 3.42027900  | 1.97495500  |

|   |             |             |             |
|---|-------------|-------------|-------------|
| C | 3.02638800  | 4.79679300  | 1.74457900  |
| C | 4.23804000  | 5.19499400  | 1.16460800  |
| C | 5.16414900  | 4.20717700  | 0.84098700  |
| C | 4.90287500  | 2.84281600  | 1.08554800  |
| C | 3.70278400  | 2.42243800  | 1.65517300  |
| C | 1.06502500  | 4.66044500  | 2.60125200  |
| H | 4.43816100  | 6.24510300  | 0.97685200  |
| H | 6.11175600  | 4.49015000  | 0.39234200  |
| H | 5.65313900  | 2.10294600  | 0.82272300  |
| H | 3.49580500  | 1.37136000  | 1.82409000  |
| H | 0.08845400  | 4.89333600  | 3.00001300  |
| N | 1.50789600  | 3.36064300  | 2.51913400  |
| N | 1.93024100  | 5.54630200  | 2.15340700  |
| C | 0.81877600  | 2.10566900  | 2.81538400  |
| H | 0.75102200  | 1.52717000  | 1.88266200  |
| H | 1.45287400  | 1.53072700  | 3.49704600  |
| C | -0.58409900 | 2.26334900  | 3.39961100  |
| H | -0.51192000 | 2.65033200  | 4.42947100  |
| H | -1.13970800 | 3.01649000  | 2.83152800  |
| C | -2.84142700 | 1.12781900  | 3.67814000  |
| H | -3.36762900 | 0.16874400  | 3.63081900  |
| H | -3.00050000 | 1.54310400  | 4.68741000  |
| H | -3.32992900 | 1.80952100  | 2.97049100  |
| C | -1.36974400 | 0.95789700  | 3.36225400  |
| C | -0.71266900 | -0.27283900 | 3.63497300  |
| H | -1.28890800 | -1.10035900 | 4.05229500  |
| H | 0.33623500  | -0.30226500 | 3.92278500  |
| C | -3.37539400 | 2.14762000  | -1.05015100 |
| C | -2.28082800 | 2.04872200  | -0.15914200 |
| C | -1.49914400 | 3.17431100  | 0.11616000  |
| C | -1.84667600 | 4.37650900  | -0.49197500 |
| C | -2.94485300 | 4.46229000  | -1.37175100 |
| C | -3.72652000 | 3.34884800  | -1.67053600 |
| C | -3.14804600 | 0.07240600  | -0.31796600 |
| H | -0.63925600 | 3.10107000  | 0.76622900  |
| H | -1.24979300 | 5.26174100  | -0.29676600 |
| H | -3.18142500 | 5.41566600  | -1.83352500 |
| H | -4.56434400 | 3.41395900  | -2.35651900 |
| H | -3.33781300 | -0.98446200 | -0.21377500 |
| N | -3.90575600 | 0.86759000  | -1.12663000 |
| N | -2.16542100 | 0.72863200  | 0.27700700  |
| C | -5.07978600 | 0.45278600  | -1.88307600 |
| H | -5.01336800 | 0.89229800  | -2.88223000 |
| H | -5.02824600 | -0.63253300 | -1.99601200 |

|   |             |             |             |
|---|-------------|-------------|-------------|
| C | -6.37750000 | 0.86536400  | -1.18707700 |
| H | -6.39441400 | 0.42039600  | -0.18260900 |
| H | -6.36611000 | 1.95101200  | -1.02106000 |
| C | -8.91343800 | 0.92507200  | -1.21301800 |
| H | -9.80579700 | 0.63071300  | -1.77151900 |
| H | -8.97696300 | 0.48655300  | -0.20886100 |
| H | -8.93599900 | 2.01420800  | -1.07892800 |
| C | -7.65020300 | 0.49318800  | -1.91152000 |
| C | -7.67726800 | -0.16585400 | -3.07458500 |
| H | -8.62038900 | -0.41099300 | -3.55516200 |
| H | -6.78008000 | -0.48666600 | -3.59435900 |

**c4-2**

|    |             |             |             |
|----|-------------|-------------|-------------|
| Ni | 0.39790800  | -0.94898100 | -1.26451300 |
| Fe | -5.22032900 | 0.51053400  | 0.68543700  |
| P  | -2.28362000 | 1.92999100  | -0.40802900 |
| P  | -1.02506700 | -1.78507500 | 0.20122300  |
| O  | -1.82902800 | 2.21218800  | 1.00741300  |
| C  | -3.55973100 | 0.65866800  | -0.51263500 |
| C  | -3.50147500 | -0.56000000 | 0.26510300  |
| C  | -4.64953000 | -1.33669700 | -0.07732900 |
| H  | -4.91240900 | -2.29028200 | 0.35521900  |
| C  | -5.41447700 | -0.62463800 | -1.04340600 |
| H  | -6.36164800 | -0.93742700 | -1.46058900 |
| C  | -4.74842500 | 0.60155100  | -1.31835000 |
| H  | -5.10515300 | 1.37022600  | -1.98586300 |
| C  | -2.41409600 | -0.96633500 | 1.21924800  |
| H  | -1.96624200 | -0.04861600 | 1.61163800  |
| C  | -2.93844300 | -1.83299600 | 2.36724900  |
| H  | -3.39272100 | -2.75529400 | 1.99945000  |
| H  | -3.70171500 | -1.28705300 | 2.92692100  |
| H  | -2.13980000 | -2.10910400 | 3.05835600  |
| C  | -6.49541000 | 2.08552500  | 1.12764600  |
| H  | -6.84271100 | 2.80991500  | 0.40467000  |
| C  | -5.30492100 | 2.18105500  | 1.90951500  |
| H  | -4.57094400 | 2.97118600  | 1.87477200  |
| C  | -5.19965000 | 0.99968800  | 2.69917700  |
| H  | -4.38786600 | 0.76758800  | 3.37279000  |
| C  | -6.32265400 | 0.16833500  | 2.40564600  |
| H  | -6.51081600 | -0.81543400 | 2.81310300  |
| C  | -7.12430700 | 0.84001300  | 1.43370800  |
| H  | -8.02592200 | 0.45412300  | 0.97830200  |
| C  | -1.89770600 | -3.30989600 | -0.34533400 |
| C  | -2.46424500 | -3.28462900 | -1.62886500 |



|   |             |             |             |
|---|-------------|-------------|-------------|
| H | -2.30955100 | -2.41218000 | -2.25566800 |
| C | -3.21550800 | -4.36102800 | -2.09912800 |
| H | -3.65030600 | -4.32225400 | -3.09366700 |
| C | -3.40004400 | -5.48805700 | -1.29565800 |
| H | -3.97749200 | -6.33151800 | -1.66284600 |
| C | -2.83382900 | -5.52917300 | -0.02022700 |
| H | -2.97144500 | -6.40402100 | 0.60891100  |
| C | -2.09235800 | -4.44562900 | 0.45451300  |
| H | -1.66344300 | -4.48855900 | 1.44975000  |
| C | 0.12928200  | -2.34956900 | 1.52096900  |
| C | 0.39993300  | -1.52623700 | 2.62892200  |
| H | -0.16447800 | -0.61068300 | 2.77629500  |
| C | 1.38526300  | -1.87135100 | 3.55558100  |
| H | 1.57479500  | -1.22173200 | 4.40520400  |
| C | 2.11983400  | -3.04844800 | 3.39599000  |
| H | 2.88772700  | -3.31602900 | 4.11496000  |
| C | 1.86289300  | -3.87328800 | 2.29901100  |
| H | 2.43103200  | -4.78878200 | 2.16198700  |
| C | 0.88287300  | -3.52567900 | 1.36874800  |
| H | 0.70037200  | -4.17282300 | 0.51794200  |
| C | -2.76118600 | 3.43881200  | -1.38110800 |
| C | -4.08987100 | 4.03354200  | -0.89408900 |
| H | -4.92660300 | 3.34217700  | -1.00740000 |
| H | -4.31604900 | 4.93804200  | -1.47103200 |
| H | -4.02849600 | 4.32083700  | 0.15893400  |
| C | -2.81714700 | 3.09085100  | -2.87767400 |
| H | -1.86412500 | 2.68144600  | -3.22601600 |
| H | -3.01602500 | 4.00002600  | -3.45684600 |
| H | -3.60186400 | 2.36866900  | -3.11555100 |
| C | -1.62945500 | 4.45532100  | -1.13308800 |
| H | -1.53737200 | 4.69139800  | -0.07028300 |
| H | -1.84761500 | 5.38091700  | -1.67854800 |
| H | -0.66558100 | 4.08139700  | -1.48432000 |
| H | -1.27695800 | 1.37949400  | -1.22609000 |
| C | 5.82658100  | -1.42595700 | -0.55178500 |
| C | 6.43290500  | -0.77713400 | 0.55613400  |
| C | 7.76985100  | -0.36653800 | 0.47974500  |
| C | 8.46434200  | -0.61963800 | -0.69885700 |
| C | 7.85001700  | -1.27122500 | -1.78827500 |
| C | 6.52214500  | -1.68642800 | -1.73555100 |
| C | 4.41335000  | -1.20708900 | 1.12997800  |
| H | 8.24067100  | 0.13080400  | 1.32183700  |
| H | 9.50212600  | -0.31171200 | -0.78529800 |
| H | 8.42632000  | -1.45339300 | -2.69041400 |

|   |            |             |             |
|---|------------|-------------|-------------|
| H | 6.05230700 | -2.18594500 | -2.57553400 |
| H | 3.48162900 | -1.30593900 | 1.67067800  |
| N | 4.52488100 | -1.68475100 | -0.15058800 |
| N | 5.51608900 | -0.65650000 | 1.59443700  |
| C | 3.43489500 | -2.25304800 | -0.93968100 |
| H | 3.67451300 | -3.29328200 | -1.18417400 |
| H | 2.56185500 | -2.26347300 | -0.28523600 |
| C | 3.12930400 | -1.44246900 | -2.20608100 |
| H | 3.37918400 | -0.39144400 | -2.01562200 |
| H | 3.80637900 | -1.76659700 | -3.01245200 |
| C | 1.51074300 | -0.89641200 | -4.05698800 |
| H | 0.45407900 | -0.81239200 | -4.33273800 |
| H | 1.95690300 | 0.10186200  | -4.10883000 |
| H | 2.00543300 | -1.50282000 | -4.83365800 |
| C | 1.68680700 | -1.52338000 | -2.68606800 |
| C | 0.79635200 | -2.56499900 | -2.29897000 |
| H | 0.00144500 | -2.85525500 | -2.98571200 |
| H | 1.12534300 | -3.38498000 | -1.66073000 |
| C | 1.94653300 | 2.96309600  | -0.66196800 |
| C | 1.30306900 | 1.99633000  | -1.47078800 |
| C | 0.99704800 | 2.28634600  | -2.80431000 |
| C | 1.37863400 | 3.52871800  | -3.30234000 |
| C | 2.03828500 | 4.47527300  | -2.49162700 |
| C | 2.32927800 | 4.21235300  | -1.15565200 |
| C | 1.48392400 | 1.14853500  | 0.51099600  |
| H | 0.47354700 | 1.56360800  | -3.41654400 |
| H | 1.15576000 | 3.78011600  | -4.33451800 |
| H | 2.31751700 | 5.43454700  | -2.91594000 |
| H | 2.82537400 | 4.94650700  | -0.52982400 |
| H | 1.43130300 | 0.48394800  | 1.35940100  |
| N | 2.04412500 | 2.38823000  | 0.59648800  |
| N | 1.03369300 | 0.86498500  | -0.70059800 |
| C | 2.70605200 | 2.95082400  | 1.76889000  |
| H | 2.47824600 | 4.01942100  | 1.79916400  |
| H | 2.25322700 | 2.49588800  | 2.65321400  |
| C | 4.21275700 | 2.69204800  | 1.74137100  |
| H | 4.38663900 | 1.61607900  | 1.62494500  |
| H | 4.64506900 | 3.15437900  | 0.84281400  |
| C | 6.39755900 | 2.66374900  | 3.01397200  |
| H | 6.93113900 | 3.05517300  | 3.88443800  |
| H | 6.41082200 | 1.56759700  | 3.05050000  |
| H | 6.95103200 | 2.95125000  | 2.11058400  |
| C | 4.97642600 | 3.16005000  | 2.95764600  |
| C | 4.44907200 | 3.92393000  | 3.92031300  |

|   |            |            |            |
|---|------------|------------|------------|
| H | 5.04049700 | 4.22792400 | 4.77978400 |
| H | 3.42194700 | 4.27516900 | 3.89957500 |

**c4-3**

|    |             |             |             |
|----|-------------|-------------|-------------|
| Ni | -0.14091800 | -2.22355200 | 0.26478300  |
| Fe | -2.57641500 | 3.26517800  | -1.01155000 |
| P  | -0.60904700 | 2.17313900  | 1.53251300  |
| P  | -2.17354500 | -1.42983200 | 0.07192200  |
| O  | -1.76043700 | 2.42448200  | 2.47947700  |
| C  | -1.08740900 | 2.10419500  | -0.20670000 |
| C  | -2.17746000 | 1.26049900  | -0.63776000 |
| C  | -2.35141300 | 1.46847600  | -2.03890700 |
| H  | -3.11313200 | 1.00830500  | -2.65031600 |
| C  | -1.38571400 | 2.41822700  | -2.48233200 |
| H  | -1.29280400 | 2.80892900  | -3.48620800 |
| C  | -0.60545300 | 2.81601200  | -1.35896900 |
| H  | 0.17613200  | 3.55906800  | -1.37276900 |
| C  | -2.93792200 | 0.31048900  | 0.23876200  |
| H  | -2.74706700 | 0.60343800  | 1.27362000  |
| C  | -4.45257900 | 0.33977600  | 0.01670600  |
| H  | -4.71815100 | 0.16156600  | -1.02713300 |
| H  | -4.84849700 | 1.31529300  | 0.30438400  |
| H  | -4.94896700 | -0.41841900 | 0.62768800  |
| C  | -2.80835000 | 5.32896900  | -1.03777200 |
| H  | -2.04069100 | 6.02285200  | -1.35190300 |
| C  | -2.99761800 | 4.82603500  | 0.28356400  |
| H  | -2.40075000 | 5.05694800  | 1.15193100  |
| C  | -4.08252200 | 3.90210000  | 0.25555200  |
| H  | -4.41970800 | 3.31985500  | 1.09940900  |
| C  | -4.56630700 | 3.83054800  | -1.08535400 |
| H  | -5.35509500 | 3.18467200  | -1.44480900 |
| C  | -3.77669400 | 4.71058400  | -1.88649200 |
| H  | -3.86995700 | 4.85311700  | -2.95436900 |
| C  | -2.94026300 | -1.94328200 | -1.52630300 |
| C  | -2.14258000 | -1.82205800 | -2.67546300 |
| H  | -1.11622400 | -1.48547800 | -2.57377700 |
| C  | -2.64810400 | -2.12528900 | -3.93899100 |
| H  | -2.01368000 | -2.01764200 | -4.81419900 |
| C  | -3.96333600 | -2.57414700 | -4.07492700 |
| H  | -4.35837600 | -2.82072300 | -5.05607300 |
| C  | -4.76574100 | -2.70834800 | -2.94093200 |
| H  | -5.78975800 | -3.05804800 | -3.03658100 |
| C  | -4.26113600 | -2.38935900 | -1.67870200 |
| H  | -4.90327800 | -2.49002000 | -0.81146200 |

|   |             |             |             |
|---|-------------|-------------|-------------|
| C | -3.11077900 | -2.31495500 | 1.38957700  |
| C | -3.22654500 | -1.72533600 | 2.66090400  |
| H | -2.86470100 | -0.71665300 | 2.83374400  |
| C | -3.80262100 | -2.42175900 | 3.72336400  |
| H | -3.88426700 | -1.94272800 | 4.69485200  |
| C | -4.27322300 | -3.72289300 | 3.53993500  |
| H | -4.72308100 | -4.26449000 | 4.36666200  |
| C | -4.16042400 | -4.32107600 | 2.28403900  |
| H | -4.52219500 | -5.33348000 | 2.12786200  |
| C | -3.58197500 | -3.62672600 | 1.22119100  |
| H | -3.49783600 | -4.11041200 | 0.25530300  |
| C | 0.84036300  | 3.30015600  | 1.76675700  |
| C | 0.46253400  | 4.75574900  | 1.46057500  |
| H | 0.15319700  | 4.89567200  | 0.42210300  |
| H | 1.32579800  | 5.40540100  | 1.64743000  |
| H | -0.35300900 | 5.09220900  | 2.10663000  |
| C | 2.01432700  | 2.82615200  | 0.90090800  |
| H | 2.24990800  | 1.77844200  | 1.09825800  |
| H | 2.90591900  | 3.41744200  | 1.13814600  |
| H | 1.82431200  | 2.92665300  | -0.16858400 |
| C | 1.21660800  | 3.16489900  | 3.25543600  |
| H | 0.38430100  | 3.45463100  | 3.90179300  |
| H | 2.07102000  | 3.81520600  | 3.47696200  |
| H | 1.50121900  | 2.13897400  | 3.50902300  |
| H | -0.00409100 | 0.91345800  | 1.71286900  |
| C | 2.93274800  | -0.94957400 | -2.85471700 |
| C | 4.27884400  | -0.71648100 | -3.24145500 |
| C | 4.74388000  | 0.59677600  | -3.39468900 |
| C | 3.85013900  | 1.63803000  | -3.16181700 |
| C | 2.51411200  | 1.38851000  | -2.78119100 |
| C | 2.02926700  | 0.09320400  | -2.61929100 |
| C | 4.04987100  | -2.84105700 | -3.09339300 |
| H | 5.77340300  | 0.78240700  | -3.68310100 |
| H | 4.18201700  | 2.66512400  | -3.28138400 |
| H | 1.84091300  | 2.22190600  | -2.61330900 |
| H | 1.00623700  | -0.08445900 | -2.30390800 |
| H | 4.22314100  | -3.90895800 | -3.09224300 |
| N | 2.81886200  | -2.32998000 | -2.75991200 |
| N | 4.94674700  | -1.92509800 | -3.38803700 |
| C | 1.66052400  | -3.06637600 | -2.25394900 |
| H | 0.89653200  | -2.32118700 | -2.02301400 |
| H | 1.26297600  | -3.70801700 | -3.04569400 |
| C | 1.97311800  | -3.86374400 | -0.97522700 |
| H | 2.34525700  | -4.86500600 | -1.24754100 |

|   |             |             |             |
|---|-------------|-------------|-------------|
| H | 2.80798000  | -3.37392700 | -0.46013600 |
| C | 1.17806400  | -4.62868500 | 1.30563300  |
| H | 0.32163000  | -4.66405100 | 1.98614900  |
| H | 1.53064700  | -5.66315900 | 1.16103100  |
| H | 1.98383800  | -4.08499700 | 1.81481400  |
| C | 0.80619900  | -3.97496700 | -0.00974800 |
| C | -0.53609000 | -4.02469900 | -0.46488000 |
| H | -1.27010900 | -4.55447100 | 0.13963000  |
| H | -0.77245500 | -4.01046600 | -1.52738500 |
| C | 2.79220500  | -0.54139400 | 2.78122300  |
| C | 1.46864800  | -0.96602800 | 2.50696900  |
| C | 0.52062900  | -1.05022100 | 3.53151300  |
| C | 0.92537800  | -0.69016300 | 4.81248800  |
| C | 2.24425800  | -0.26383200 | 5.07559400  |
| C | 3.20181600  | -0.18208400 | 4.06741400  |
| C | 2.53822700  | -0.97736000 | 0.62680700  |
| H | -0.48995000 | -1.38096400 | 3.31902700  |
| H | 0.21151800  | -0.73382900 | 5.62876700  |
| H | 2.51917700  | 0.01097400  | 6.08910800  |
| H | 4.21366400  | 0.15011800  | 4.27408600  |
| H | 2.79908900  | -1.06067600 | -0.41386400 |
| N | 3.45126700  | -0.57170700 | 1.55831100  |
| N | 1.34632800  | -1.22822900 | 1.14160900  |
| C | 4.85674100  | -0.28531600 | 1.27631400  |
| H | 5.42149700  | -0.46882100 | 2.19308000  |
| H | 5.19735500  | -1.00835100 | 0.53034800  |
| C | 5.06973100  | 1.13799100  | 0.76455500  |
| H | 4.40651100  | 1.30497500  | -0.09368200 |
| H | 4.74132700  | 1.85038900  | 1.53220900  |
| C | 6.63058400  | 2.84891600  | -0.25388100 |
| H | 7.66845600  | 3.06558100  | -0.51995100 |
| H | 6.01588700  | 2.94034400  | -1.15820000 |
| H | 6.28466900  | 3.62537900  | 0.44085000  |
| C | 6.48137000  | 1.47630000  | 0.34859000  |
| C | 7.51906300  | 0.64438900  | 0.48133400  |
| H | 8.51450100  | 0.93724700  | 0.15923100  |
| H | 7.42830300  | -0.35130800 | 0.90368200  |

**c4-4**

|    |             |             |             |
|----|-------------|-------------|-------------|
| Ni | -1.00073200 | -0.20073900 | 1.36253200  |
| Fe | 4.70669000  | -1.71481700 | -0.68612900 |
| P  | 2.58913400  | 0.91304200  | -0.90162600 |
| P  | 0.01419700  | -1.95248900 | 0.46390300  |
| O  | 2.38492700  | 0.58324600  | -2.36230400 |

|   |             |             |             |
|---|-------------|-------------|-------------|
| C | 3.29529000  | -0.43405600 | 0.06772400  |
| C | 2.74842900  | -1.77045900 | 0.00591200  |
| C | 3.57216500  | -2.60474100 | 0.81963400  |
| H | 3.44324000  | -3.66750100 | 0.95950100  |
| C | 4.60947600  | -1.81164600 | 1.38651700  |
| H | 5.41184200  | -2.17066600 | 2.01617500  |
| C | 4.44480700  | -0.47402600 | 0.93065800  |
| H | 5.09809900  | 0.35069400  | 1.16768100  |
| C | 1.50314000  | -2.18417000 | -0.72146400 |
| H | 1.33283200  | -1.46367300 | -1.52712900 |
| C | 1.60526800  | -3.58826700 | -1.32388800 |
| H | 1.81553000  | -4.34161000 | -0.56241900 |
| H | 2.41762600  | -3.62087000 | -2.05305000 |
| H | 0.67981300  | -3.87029600 | -1.83016900 |
| C | 6.43418800  | -1.11775900 | -1.65962500 |
| H | 7.07458900  | -0.31635200 | -1.31819600 |
| C | 5.30957500  | -0.98226800 | -2.52774200 |
| H | 4.91035800  | -0.06711900 | -2.93717700 |
| C | 4.71576300  | -2.26835000 | -2.68253800 |
| H | 3.82621600  | -2.47774400 | -3.25766200 |
| C | 5.46927900  | -3.20252000 | -1.90923900 |
| H | 5.24951200  | -4.25425600 | -1.78865200 |
| C | 6.53302000  | -2.49074400 | -1.27576600 |
| H | 7.26049800  | -2.90994600 | -0.59424500 |
| C | 0.42608400  | -3.22202100 | 1.73218600  |
| C | 0.94480800  | -2.74490700 | 2.94586000  |
| H | 1.01153300  | -1.67209000 | 3.10137000  |
| C | 1.36328300  | -3.62646500 | 3.94153500  |
| H | 1.76742700  | -3.23838400 | 4.87207200  |
| C | 1.25414500  | -5.00477700 | 3.74481600  |
| H | 1.57200500  | -5.69401800 | 4.52171600  |
| C | 0.72592300  | -5.49269000 | 2.54853700  |
| H | 0.63066400  | -6.56336200 | 2.39144600  |
| C | 0.31893800  | -4.60836800 | 1.54734900  |
| H | -0.08935200 | -5.00354700 | 0.62432900  |
| C | -1.33906200 | -2.67559200 | -0.55890000 |
| C | -1.51721400 | -2.19791600 | -1.86934800 |
| H | -0.76711100 | -1.55413400 | -2.31838000 |
| C | -2.65013300 | -2.53461100 | -2.60942500 |
| H | -2.77183700 | -2.14131400 | -3.61441300 |
| C | -3.62514400 | -3.36977700 | -2.06045100 |
| H | -4.51486900 | -3.62055400 | -2.62938300 |
| C | -3.44369000 | -3.88005900 | -0.77454300 |
| H | -4.19007700 | -4.53966800 | -0.34117600 |

|   |             |             |             |
|---|-------------|-------------|-------------|
| C | -2.31372600 | -3.53569000 | -0.03002700 |
| H | -2.20092800 | -3.92712600 | 0.97385700  |
| C | 3.51847600  | 2.48917500  | -0.59582900 |
| C | 4.97003300  | 2.38962200  | -1.08605600 |
| H | 5.54496700  | 1.63953100  | -0.53945700 |
| H | 5.46809000  | 3.35772200  | -0.95517000 |
| H | 5.00819100  | 2.13727800  | -2.14915000 |
| C | 3.45252900  | 2.85528300  | 0.89486000  |
| H | 2.41931600  | 2.86688100  | 1.25683200  |
| H | 3.87213500  | 3.85683500  | 1.04710100  |
| H | 4.01613300  | 2.16259600  | 1.52341100  |
| C | 2.77302200  | 3.55129500  | -1.42717100 |
| H | 2.78527100  | 3.29945600  | -2.49029200 |
| H | 3.25440200  | 4.52730100  | -1.29446200 |
| H | 1.72724700  | 3.64308200  | -1.12175800 |
| H | 1.38846900  | 1.16786000  | -0.21210400 |
| C | -6.26125300 | -0.46118900 | -0.56517800 |
| C | -6.95652600 | 0.21270500  | -1.60232600 |
| C | -8.30422300 | -0.08615300 | -1.84136400 |
| C | -8.91367200 | -1.04740100 | -1.04035200 |
| C | -8.20496400 | -1.70930400 | -0.01588300 |
| C | -6.86560800 | -1.42800100 | 0.24163300  |
| C | -4.95252000 | 0.96926600  | -1.61965200 |
| H | -8.84675800 | 0.42234500  | -2.63225600 |
| H | -9.95778000 | -1.29686500 | -1.20503900 |
| H | -8.71656000 | -2.45390600 | 0.58688600  |
| H | -6.32009400 | -1.93524200 | 1.03098000  |
| H | -4.03992200 | 1.50086100  | -1.85633900 |
| N | -4.97532900 | 0.04820800  | -0.60164700 |
| N | -6.10343600 | 1.10339200  | -2.24325400 |
| C | -3.86722100 | -0.32920600 | 0.26711800  |
| H | -3.94560900 | -1.40174900 | 0.44461100  |
| H | -2.93901800 | -0.17173200 | -0.28429200 |
| C | -3.82904700 | 0.45101000  | 1.58410500  |
| H | -3.78943800 | 1.52246400  | 1.34696300  |
| H | -4.77958500 | 0.29519900  | 2.12013900  |
| C | -2.49240900 | 1.02182300  | 3.66240000  |
| H | -1.60673000 | 0.77363900  | 4.25736000  |
| H | -2.41483400 | 2.07266800  | 3.35695800  |
| H | -3.36500200 | 0.96020800  | 4.33247700  |
| C | -2.64591600 | 0.09292200  | 2.47543800  |
| C | -2.17497800 | -1.24260100 | 2.56897900  |
| H | -1.65111600 | -1.55131900 | 3.47367900  |
| H | -2.69627400 | -2.05630000 | 2.07237000  |

|   |             |            |             |
|---|-------------|------------|-------------|
| C | -0.89630400 | 3.59395200 | -0.48931000 |
| C | -0.95698300 | 2.18237700 | -0.53280500 |
| C | -1.20382300 | 1.52216700 | -1.73956600 |
| C | -1.39505400 | 2.30166500 | -2.87560400 |
| C | -1.34590500 | 3.70982400 | -2.81788100 |
| C | -1.09301100 | 4.38278200 | -1.62591000 |
| C | -0.51428700 | 2.73129300 | 1.51481400  |
| H | -1.23784400 | 0.44121500 | -1.77503500 |
| H | -1.58249700 | 1.81738800 | -3.82837300 |
| H | -1.50408400 | 4.28230100 | -3.72618600 |
| H | -1.04907500 | 5.46576800 | -1.58620100 |
| H | -0.31706700 | 2.70033600 | 2.57518900  |
| N | -0.60914800 | 3.91296800 | 0.83150800  |
| N | -0.71975500 | 1.67403700 | 0.74517400  |
| C | -0.42883800 | 5.25403500 | 1.37642200  |
| H | -1.23756500 | 5.88366400 | 0.99463900  |
| H | -0.54699600 | 5.18960900 | 2.46065200  |
| C | 0.93681700  | 5.83696600 | 1.01196900  |
| H | 1.71745300  | 5.16851400 | 1.39631500  |
| H | 1.05625100  | 5.81753900 | -0.07896400 |
| C | 2.56449100  | 7.77322900 | 1.13721100  |
| H | 2.71742300  | 8.78754000 | 1.51454200  |
| H | 3.36103300  | 7.13424800 | 1.54022100  |
| H | 2.69818400  | 7.78846600 | 0.04782000  |
| C | 1.20532000  | 7.23816100 | 1.50682300  |
| C | 0.32943600  | 7.95876400 | 2.21425600  |
| H | 0.57297500  | 8.96390100 | 2.54704300  |
| H | -0.65360600 | 7.59015400 | 2.48959600  |

**c5**

|    |             |             |             |
|----|-------------|-------------|-------------|
| Ni | 1.32647200  | 1.06626300  | -0.34576500 |
| Fe | -3.75184800 | -2.09733400 | -0.37592000 |
| P  | -2.52064300 | -1.32549000 | 2.67504700  |
| P  | 0.90603700  | -1.09097500 | -0.71472300 |
| O  | -2.36641700 | -2.80750300 | 2.91876800  |
| C  | -2.73851900 | -0.87699700 | 0.93988700  |
| C  | -1.81312100 | -1.32952800 | -0.07777800 |
| C  | -2.33987500 | -0.91303300 | -1.33823900 |
| H  | -1.90990500 | -1.13606300 | -2.30136900 |
| C  | -3.54313000 | -0.18141700 | -1.11720300 |
| H  | -4.17857900 | 0.24612500  | -1.87996100 |
| C  | -3.79708500 | -0.15713000 | 0.28175200  |
| H  | -4.65435600 | 0.29989100  | 0.74855200  |
| C  | -0.47893400 | -1.98666300 | 0.20749100  |



|   |             |             |             |
|---|-------------|-------------|-------------|
| H | -0.23520400 | -1.75730600 | 1.24909600  |
| C | -0.46509400 | -3.51060900 | 0.07337200  |
| H | -0.76782200 | -3.82431100 | -0.92675500 |
| H | -1.16091500 | -3.92593300 | 0.80530100  |
| H | 0.53170500  | -3.90971200 | 0.28229400  |
| C | -5.55475800 | -2.93694200 | 0.18708000  |
| H | -6.27648000 | -2.43901500 | 0.81923100  |
| C | -4.47843800 | -3.76304700 | 0.63183900  |
| H | -4.20255600 | -3.96335500 | 1.65685400  |
| C | -3.74311800 | -4.17680400 | -0.51656000 |
| H | -2.85618600 | -4.79055200 | -0.51001600 |
| C | -4.35467600 | -3.60210500 | -1.67058600 |
| H | -4.00543700 | -3.69624500 | -2.68954100 |
| C | -5.47866500 | -2.83734700 | -1.23606500 |
| H | -6.12801700 | -2.24675300 | -1.86754200 |
| C | 0.77387600  | -1.73030200 | -2.43385400 |
| C | 0.31566700  | -0.85589900 | -3.43084700 |
| H | 0.09645100  | 0.17404100  | -3.17168500 |
| C | 0.12803800  | -1.29769600 | -4.74052400 |
| H | -0.23167600 | -0.60712200 | -5.49745000 |
| C | 0.40855300  | -2.62337700 | -5.07536000 |
| H | 0.26776500  | -2.96976000 | -6.09481800 |
| C | 0.87867000  | -3.50106800 | -4.09639100 |
| H | 1.10497600  | -4.53195400 | -4.35217500 |
| C | 1.05915100  | -3.05975700 | -2.78547500 |
| H | 1.43275600  | -3.75029600 | -2.03839700 |
| C | 2.41846300  | -1.89079100 | -0.04350500 |
| C | 2.58439000  | -1.98663200 | 1.34875900  |
| H | 1.76377700  | -1.74382800 | 2.01620900  |
| C | 3.80727400  | -2.37134500 | 1.89670800  |
| H | 3.91616100  | -2.43511300 | 2.97528100  |
| C | 4.89187600  | -2.65987600 | 1.06619200  |
| H | 5.85012300  | -2.93693800 | 1.49352800  |
| C | 4.73696000  | -2.57887500 | -0.31770500 |
| H | 5.57568200  | -2.79782600 | -0.97114800 |
| C | 3.51235500  | -2.19763300 | -0.86908200 |
| H | 3.41472000  | -2.12449600 | -1.94643200 |
| C | -3.79361900 | -0.49134700 | 3.72952100  |
| C | -5.18942900 | -1.05816600 | 3.42950500  |
| H | -5.51612100 | -0.82908800 | 2.41301500  |
| H | -5.91859300 | -0.62476100 | 4.12353900  |
| H | -5.20761400 | -2.14429500 | 3.55686400  |
| C | -3.74476200 | 1.03010700  | 3.52392700  |
| H | -2.72427800 | 1.41900600  | 3.61884400  |

|   |             |             |             |
|---|-------------|-------------|-------------|
| H | -4.35658600 | 1.52316500  | 4.28781400  |
| H | -4.13284400 | 1.32651500  | 2.54866000  |
| C | -3.39754100 | -0.83177500 | 5.17952100  |
| H | -3.37910100 | -1.91206600 | 5.34431000  |
| H | -4.12372400 | -0.38781700 | 5.86948700  |
| H | -2.40908000 | -0.43161300 | 5.43125700  |
| H | -1.36253900 | -0.59010800 | 3.03831800  |
| C | 6.75181700  | 0.61244900  | 0.61684000  |
| C | 7.71068300  | 0.70068500  | 1.65769600  |
| C | 9.04236300  | 0.34515200  | 1.40581200  |
| C | 9.37235600  | -0.08856100 | 0.12535000  |
| C | 8.40373800  | -0.17225100 | -0.89679800 |
| C | 7.07494200  | 0.17781800  | -0.67073500 |
| C | 5.83923500  | 1.31001400  | 2.50097800  |
| H | 9.78540600  | 0.40784900  | 2.19452900  |
| H | 10.39747300 | -0.37032300 | -0.09595500 |
| H | 8.70213400  | -0.51527700 | -1.88302600 |
| H | 6.32927900  | 0.11249200  | -1.45607300 |
| H | 5.05623900  | 1.64263600  | 3.17013700  |
| N | 5.55662500  | 1.01110900  | 1.19101500  |
| N | 7.10177200  | 1.14330800  | 2.82653900  |
| C | 4.26187600  | 1.05586600  | 0.52441900  |
| H | 4.21559900  | 0.18830600  | -0.13163800 |
| H | 3.48457800  | 0.92036700  | 1.27827800  |
| C | 4.02429200  | 2.35258400  | -0.25509900 |
| H | 3.97088700  | 3.18454700  | 0.45354700  |
| H | 4.90239800  | 2.54981000  | -0.88815800 |
| C | 2.32384000  | 3.70528500  | -1.58575200 |
| H | 1.42110100  | 3.64982400  | -2.20133200 |
| H | 2.12517800  | 4.38029600  | -0.74903800 |
| H | 3.10719000  | 4.18140300  | -2.19467500 |
| C | 2.77950300  | 2.33442800  | -1.13481300 |
| C | 2.51322500  | 1.22711600  | -1.95266900 |
| H | 1.91966100  | 1.36872300  | -2.85214200 |
| H | 3.19141500  | 0.37877200  | -1.99944600 |
| C | -3.54777000 | 3.71991600  | -0.70852500 |
| C | -4.24645200 | 4.38127100  | -1.75021300 |
| C | -5.51233200 | 4.92664000  | -1.49886400 |
| C | -6.04054500 | 4.79201500  | -0.21829800 |
| C | -5.32989100 | 4.13219900  | 0.80617400  |
| C | -4.06875200 | 3.58616200  | 0.58050900  |
| C | -2.40092900 | 3.69918300  | -2.59374400 |
| H | -6.05687500 | 5.43500400  | -2.28817300 |
| H | -7.01995700 | 5.20589300  | 0.00192000  |

|   |             |            |             |
|---|-------------|------------|-------------|
| H | -5.77311400 | 4.05328000 | 1.79445000  |
| H | -3.51697700 | 3.08903500 | 1.37000000  |
| H | -1.58031100 | 3.47301700 | -3.26251400 |
| N | -2.36239700 | 3.29200800 | -1.28210500 |
| N | -3.49468900 | 4.35057500 | -2.91915800 |
| C | -1.33065000 | 2.49235100 | -0.63735500 |
| H | -1.82627900 | 1.64884100 | -0.15701200 |
| H | -0.68703500 | 2.07952600 | -1.42000000 |
| C | -0.48307400 | 3.27943600 | 0.36486400  |
| H | -0.01345300 | 4.11967400 | -0.15618800 |
| H | -1.13972000 | 3.72734600 | 1.12577400  |
| C | 1.55732200  | 3.23184300 | 1.88657400  |
| H | 2.31530500  | 2.59097400 | 2.34499700  |
| H | 2.06632900  | 4.00893100 | 1.31110500  |
| H | 1.02388800  | 3.74193500 | 2.70276000  |
| C | 0.57850700  | 2.43417600 | 1.05612700  |
| C | 0.30678400  | 1.10259300 | 1.38895100  |
| H | 0.89725800  | 0.62042800 | 2.16665700  |
| H | -0.67355100 | 0.67369600 | 1.22949200  |

**c6**

|    |             |             |             |
|----|-------------|-------------|-------------|
| Ni | 0.32794400  | 0.92063400  | 0.22475200  |
| Fe | -0.32107900 | -4.50497100 | -0.51774900 |
| P  | -0.02726800 | -1.34970200 | -1.81520500 |
| P  | -0.42520300 | -0.28923700 | 1.73554800  |
| O  | -1.51285500 | -1.36998500 | -2.14024200 |
| C  | 0.49081800  | -2.62638200 | -0.65168600 |
| C  | -0.13113400 | -2.80288600 | 0.64297700  |
| C  | 0.52506100  | -3.89628400 | 1.28367100  |
| H  | 0.26922500  | -4.29761900 | 2.25269100  |
| C  | 1.53288000  | -4.40255000 | 0.41491300  |
| H  | 2.16753200  | -5.25695600 | 0.60589700  |
| C  | 1.51959500  | -3.62491100 | -0.77573500 |
| H  | 2.14885600  | -3.79334400 | -1.63478200 |
| C  | -1.22058500 | -1.95824300 | 1.23162600  |
| H  | -1.89759400 | -1.68024400 | 0.41848900  |
| C  | -1.99563200 | -2.67605000 | 2.33657000  |
| H  | -1.35410500 | -2.90792500 | 3.19014700  |
| H  | -2.41176500 | -3.61769400 | 1.96256600  |
| H  | -2.81933000 | -2.06000500 | 2.70319100  |
| C  | -0.73040300 | -5.66721400 | -2.18131300 |
| H  | -0.06253900 | -5.76928600 | -3.02536700 |
| C  | -1.73050100 | -4.66076700 | -2.02088400 |
| H  | -1.93161500 | -3.83594800 | -2.68871300 |

|   |             |             |             |
|---|-------------|-------------|-------------|
| C | -2.34239000 | -4.84908500 | -0.74561300 |
| H | -3.10661900 | -4.21741100 | -0.31567200 |
| C | -1.72321200 | -5.97259300 | -0.11687100 |
| H | -1.93959400 | -6.34670000 | 0.87431300  |
| C | -0.72555900 | -6.47864100 | -1.00454900 |
| H | -0.05698700 | -7.30464200 | -0.80401900 |
| C | 0.53913700  | -0.88138400 | 3.21187200  |
| C | 1.86899300  | -1.26325000 | 2.97441600  |
| H | 2.26573900  | -1.16276900 | 1.96742800  |
| C | 2.66809500  | -1.76867500 | 3.99986300  |
| H | 3.69142700  | -2.06997700 | 3.79172000  |
| C | 2.15453600  | -1.88001800 | 5.29423600  |
| H | 2.77724600  | -2.26013100 | 6.09917900  |
| C | 0.83618600  | -1.49678600 | 5.54776500  |
| H | 0.42930800  | -1.58160700 | 6.55195700  |
| C | 0.03235800  | -1.01161000 | 4.51363300  |
| H | -0.99396900 | -0.72862100 | 4.72200000  |
| C | -1.83999400 | 0.61026500  | 2.50473600  |
| C | -3.14337000 | 0.49361700  | 1.99314400  |
| H | -3.36253800 | -0.24779400 | 1.23199500  |
| C | -4.16766500 | 1.32967900  | 2.43844100  |
| H | -5.16901800 | 1.21215500  | 2.03439700  |
| C | -3.91159900 | 2.31308600  | 3.39470500  |
| H | -4.70745000 | 2.96924500  | 3.73433600  |
| C | -2.61825900 | 2.44994800  | 3.90304900  |
| H | -2.40184300 | 3.21833900  | 4.64021400  |
| C | -1.59646600 | 1.61156100  | 3.46129900  |
| H | -0.59289200 | 1.74011600  | 3.85620700  |
| C | 1.05102500  | -1.37515700 | -3.32850200 |
| C | 0.88792500  | -2.69159800 | -4.10213100 |
| H | 1.24237500  | -3.55515900 | -3.53584700 |
| H | 1.45830200  | -2.64538700 | -5.03794200 |
| H | -0.16133000 | -2.86562400 | -4.35838900 |
| C | 2.51248400  | -1.10681200 | -2.93687000 |
| H | 2.59984200  | -0.17793000 | -2.36464000 |
| H | 3.12146100  | -0.99819300 | -3.84234600 |
| H | 2.94403400  | -1.91196900 | -2.33873900 |
| C | 0.54213500  | -0.20682300 | -4.19553100 |
| H | -0.50921500 | -0.33916000 | -4.46348500 |
| H | 1.13210700  | -0.15174900 | -5.11772800 |
| H | 0.64774500  | 0.75037200  | -3.67492700 |
| H | 0.40209100  | -0.12162600 | -1.17016200 |
| C | 3.81026500  | 2.92969600  | -1.09044500 |
| C | 2.44079200  | 2.59251900  | -1.19330100 |

|   |             |             |             |
|---|-------------|-------------|-------------|
| C | 1.67140500  | 3.06236100  | -2.26187600 |
| C | 2.30636000  | 3.85596700  | -3.21222500 |
| C | 3.67478400  | 4.18070400  | -3.10457000 |
| C | 4.45242700  | 3.72610300  | -2.04224900 |
| C | 3.18310300  | 1.65102000  | 0.60674800  |
| H | 0.61906300  | 2.81067000  | -2.31954100 |
| H | 1.73837100  | 4.23755900  | -4.05511900 |
| H | 4.13327900  | 4.80259900  | -3.86739500 |
| H | 5.50385200  | 3.98162600  | -1.96119500 |
| H | 3.25475600  | 1.07825800  | 1.51942900  |
| N | 4.25385000  | 2.32058100  | 0.07608800  |
| N | 2.08427600  | 1.78176100  | -0.11489500 |
| C | 5.62114600  | 2.30750800  | 0.57785600  |
| H | 6.01515000  | 3.32647000  | 0.52123800  |
| H | 5.58333400  | 2.02752500  | 1.63333400  |
| C | 6.50516400  | 1.33844400  | -0.20989900 |
| H | 6.06914300  | 0.33187900  | -0.14486700 |
| H | 6.46298500  | 1.60154200  | -1.27535000 |
| C | 8.80220600  | 0.32509100  | -0.57607400 |
| H | 9.83812100  | 0.31685100  | -0.22727500 |
| H | 8.41073800  | -0.69837700 | -0.51269800 |
| H | 8.80037100  | 0.59394600  | -1.64024700 |
| C | 7.95162400  | 1.27807700  | 0.22292000  |
| C | 8.45542400  | 2.00002600  | 1.22919700  |
| H | 9.50377400  | 1.92056300  | 1.50337400  |
| H | 7.85942300  | 2.69072800  | 1.81694800  |
| C | -2.92448000 | 3.50613300  | -0.51669700 |
| C | -1.61794300 | 3.20938700  | -0.06258100 |
| C | -0.95925300 | 4.07219100  | 0.81739800  |
| C | -1.63230800 | 5.22247700  | 1.21791900  |
| C | -2.93390800 | 5.51025200  | 0.75794000  |
| C | -3.60516600 | 4.65818900  | -0.11616700 |
| C | -2.21360500 | 1.57805700  | -1.35711000 |
| H | 0.03513700  | 3.82537200  | 1.17330400  |
| H | -1.15127000 | 5.91190600  | 1.90519000  |
| H | -3.42770700 | 6.41594300  | 1.09734600  |
| H | -4.61005600 | 4.88032300  | -0.46040400 |
| H | -2.22797700 | 0.63106300  | -1.88702400 |
| N | -3.27275900 | 2.45132200  | -1.34843600 |
| N | -1.20553500 | 1.99575400  | -0.60890200 |
| C | -4.56676700 | 2.24070200  | -1.97970700 |
| H | -4.89599400 | 3.19096400  | -2.41055900 |
| H | -4.42405300 | 1.53656300  | -2.80292200 |
| C | -5.60056000 | 1.70845300  | -0.98571900 |

|   |             |            |             |
|---|-------------|------------|-------------|
| H | -5.23429300 | 0.75670400 | -0.57806100 |
| H | -5.64837000 | 2.38927800 | -0.12580400 |
| C | -7.98368400 | 0.97701500 | -0.52603000 |
| H | -8.97690500 | 0.84543300 | -0.96354900 |
| H | -7.65547500 | 0.00983800 | -0.12388700 |
| H | -8.07369800 | 1.65709300 | 0.33105800  |
| C | -6.99360700 | 1.50524900 | -1.53169600 |
| C | -7.34172200 | 1.76286900 | -2.79656000 |
| H | -8.35883900 | 1.59810000 | -3.14164300 |
| H | -6.64199700 | 2.14080000 | -3.53523300 |

**c6-2**

|    |             |             |             |
|----|-------------|-------------|-------------|
| Ni | 0.42092400  | -0.26751000 | 0.16696200  |
| Fe | -5.13540100 | -0.26627800 | -0.77469300 |
| P  | -1.97968900 | -0.94707200 | -1.89882600 |
| P  | -0.95447800 | 0.79683500  | 1.29761000  |
| O  | -2.25365000 | 0.03651600  | -3.02343700 |
| C  | -3.22644800 | -1.00631900 | -0.59333800 |
| C  | -3.43107800 | 0.07093400  | 0.34913400  |
| C  | -4.50744000 | -0.31370600 | 1.20438400  |
| H  | -4.91732900 | 0.28497500  | 2.00374400  |
| C  | -4.97443600 | -1.59844400 | 0.80917100  |
| H  | -5.80727400 | -2.13364300 | 1.24393000  |
| C  | -4.19233000 | -2.03000800 | -0.29736200 |
| H  | -4.33050400 | -2.95278900 | -0.83833600 |
| C  | -2.60967700 | 1.32160700  | 0.47630700  |
| H  | -2.31126500 | 1.64732100  | -0.52542400 |
| C  | -3.37496000 | 2.44706900  | 1.17338900  |
| H  | -3.63631700 | 2.17635300  | 2.19928600  |
| H  | -4.30537400 | 2.65949000  | 0.63595400  |
| H  | -2.78591400 | 3.36454800  | 1.21472200  |
| C  | -6.36560400 | -0.61160500 | -2.40490600 |
| H  | -6.49461100 | -1.57854500 | -2.87162000 |
| C  | -5.36577100 | 0.35127500  | -2.73636500 |
| H  | -4.55842200 | 0.23030500  | -3.44384400 |
| C  | -5.50859200 | 1.45662400  | -1.84563800 |
| H  | -4.86594400 | 2.32522700  | -1.81463700 |
| C  | -6.59974200 | 1.18081000  | -0.96524100 |
| H  | -6.93734200 | 1.80866000  | -0.15226300 |
| C  | -7.12925300 | -0.10021900 | -1.30970200 |
| H  | -7.93882200 | -0.60906800 | -0.80455000 |
| C  | -1.64712300 | 0.20112000  | 2.91655400  |
| C  | -1.87483300 | -1.17912900 | 3.02392700  |
| H  | -1.58686100 | -1.81637800 | 2.19187200  |

|   |             |             |             |
|---|-------------|-------------|-------------|
| C | -2.45628700 | -1.72552400 | 4.16786400  |
| H | -2.62893500 | -2.79659900 | 4.22770500  |
| C | -2.80828000 | -0.89651900 | 5.23519800  |
| H | -3.25228300 | -1.31879200 | 6.13233400  |
| C | -2.58193200 | 0.47872800  | 5.14559000  |
| H | -2.85247100 | 1.12935000  | 5.97301500  |
| C | -2.01200100 | 1.02386800  | 3.99308300  |
| H | -1.84500000 | 2.09422700  | 3.93441300  |
| C | -0.16798800 | 2.40006900  | 1.76862800  |
| C | -0.19900500 | 3.50512500  | 0.90251100  |
| H | -0.79000400 | 3.46847500  | -0.00610200 |
| C | 0.54821100  | 4.65163300  | 1.17513200  |
| H | 0.50270900  | 5.49090200  | 0.48782300  |
| C | 1.35857300  | 4.71386800  | 2.30999400  |
| H | 1.93846900  | 5.60769600  | 2.52247600  |
| C | 1.41560500  | 3.61408000  | 3.17092000  |
| H | 2.04463500  | 3.64703300  | 4.05670600  |
| C | 0.66272700  | 2.47200500  | 2.90204500  |
| H | 0.71735400  | 1.62506300  | 3.57911500  |
| C | -1.62525500 | -2.66333900 | -2.50481700 |
| C | -2.78757300 | -3.18507100 | -3.36254700 |
| H | -3.70653300 | -3.31168400 | -2.78511700 |
| H | -2.52586000 | -4.15945000 | -3.79268900 |
| H | -3.00175000 | -2.49692100 | -4.18541100 |
| C | -1.31456300 | -3.58858200 | -1.31865000 |
| H | -0.58473300 | -3.13304700 | -0.64162300 |
| H | -0.89653900 | -4.53383500 | -1.68617500 |
| H | -2.20720000 | -3.82264700 | -0.73482300 |
| C | -0.37288600 | -2.50757600 | -3.38993800 |
| H | -0.56599600 | -1.84209500 | -4.23562000 |
| H | -0.06922600 | -3.48608200 | -3.78045800 |
| H | 0.46268500  | -2.09035400 | -2.81991800 |
| H | -0.78101800 | -0.63933100 | -1.13788600 |
| C | 2.84470600  | -3.57844500 | 1.22481400  |
| C | 1.91004200  | -2.55641700 | 1.51244000  |
| C | 1.43276700  | -2.38061100 | 2.81420000  |
| C | 1.90335900  | -3.24610400 | 3.79671200  |
| C | 2.83182300  | -4.26496300 | 3.49825600  |
| C | 3.32208400  | -4.44960600 | 2.20795500  |
| C | 2.35865100  | -2.42039400 | -0.59900600 |
| H | 0.71600100  | -1.59709300 | 3.02714000  |
| H | 1.54706200  | -3.13677200 | 4.81643700  |
| H | 3.17453600  | -4.92023900 | 4.29334000  |
| H | 4.03864600  | -5.23224100 | 1.98137000  |

|   |             |             |             |
|---|-------------|-------------|-------------|
| H | 2.37839300  | -2.11544500 | -1.63467500 |
| N | 3.10615700  | -3.47016200 | -0.13485800 |
| N | 1.62015400  | -1.85406200 | 0.34083600  |
| C | 4.05438500  | -4.26714700 | -0.90097300 |
| H | 3.90995400  | -5.31805700 | -0.63316300 |
| H | 3.79894500  | -4.15974100 | -1.95800100 |
| C | 5.49997200  | -3.83559700 | -0.64607300 |
| H | 5.60328200  | -2.77486900 | -0.91408700 |
| H | 5.70184500  | -3.88147100 | 0.43254800  |
| C | 7.97073700  | -4.19152700 | -1.10039300 |
| H | 8.69745300  | -4.79619900 | -1.64909200 |
| H | 8.11663200  | -3.14076600 | -1.38215000 |
| H | 8.20362400  | -4.26247800 | -0.03009900 |
| C | 6.55649200  | -4.63274500 | -1.37535200 |
| C | 6.28242900  | -5.64844100 | -2.20044400 |
| H | 7.07910400  | -6.19092800 | -2.70188500 |
| H | 5.27156500  | -5.98172600 | -2.41226800 |
| C | 2.05651800  | 3.16133200  | -1.52628100 |
| C | 1.18403000  | 2.07090500  | -1.75600100 |
| C | 0.07246300  | 2.21837800  | -2.59280700 |
| C | -0.12770200 | 3.46745400  | -3.17655400 |
| C | 0.74742200  | 4.54779700  | -2.94007100 |
| C | 1.85823400  | 4.41418000  | -2.11032900 |
| C | 2.68087100  | 1.39555300  | -0.34775500 |
| H | -0.62173200 | 1.40169400  | -2.77292700 |
| H | -0.98349800 | 3.61273300  | -3.82904600 |
| H | 0.55094900  | 5.50528000  | -3.41342700 |
| H | 2.52346200  | 5.24875600  | -1.91479900 |
| H | 3.24584300  | 0.80403500  | 0.35771800  |
| N | 2.99791900  | 2.70015600  | -0.61734400 |
| N | 1.60186600  | 0.97902300  | -0.99094200 |
| C | 4.07573000  | 3.47730700  | -0.02496800 |
| H | 3.65664800  | 4.43178400  | 0.30556800  |
| H | 4.41269600  | 2.94657200  | 0.86866400  |
| C | 5.23303000  | 3.69440500  | -1.00038900 |
| H | 5.62157600  | 2.71516100  | -1.31326000 |
| H | 4.84598400  | 4.15535700  | -1.91911200 |
| C | 7.49439500  | 4.74825900  | -1.46431600 |
| H | 8.29752300  | 5.35727600  | -1.04103100 |
| H | 7.92342200  | 3.79067100  | -1.78654600 |
| H | 7.12828100  | 5.24605600  | -2.37151100 |
| C | 6.37548900  | 4.53412900  | -0.47792900 |
| C | 6.41263700  | 5.05548200  | 0.75286300  |
| H | 7.25882300  | 5.65360700  | 1.07989300  |



|   |            |            |            |
|---|------------|------------|------------|
| H | 5.61852800 | 4.91516400 | 1.47921500 |
|---|------------|------------|------------|

**c6-3**

|    |             |             |             |
|----|-------------|-------------|-------------|
| Ni | -0.62405700 | 0.53284300  | 0.31336100  |
| Fe | 3.65157800  | -2.78397200 | -0.74661100 |
| P  | 1.42308800  | -0.46157600 | -1.87677100 |
| P  | -0.38850100 | -1.27639900 | 1.30413300  |
| O  | 0.80333400  | -1.55310200 | -2.73002500 |
| C  | 2.50296900  | -1.08751800 | -0.57446300 |
| C  | 2.06753200  | -2.08095300 | 0.38280900  |
| C  | 3.17811300  | -2.36756000 | 1.23218300  |
| H  | 3.18130000  | -3.09050300 | 2.03384100  |
| C  | 4.29064200  | -1.58068600 | 0.81760400  |
| H  | 5.28548500  | -1.61293000 | 1.24012000  |
| C  | 3.88169500  | -0.79034100 | -0.29270400 |
| H  | 4.51842500  | -0.12112100 | -0.84908900 |
| C  | 0.68346700  | -2.64593100 | 0.50671100  |
| H  | 0.27209200  | -2.74392800 | -0.50271400 |
| C  | 0.65430600  | -3.99826600 | 1.21928800  |
| H  | 1.03535200  | -3.92213300 | 2.24040500  |
| H  | 1.27119100  | -4.72660600 | 0.68258200  |
| H  | -0.36252300 | -4.39123600 | 1.27866100  |
| C  | 4.77695900  | -3.21898800 | -2.43183600 |
| H  | 5.37559600  | -2.49496200 | -2.96665500 |
| C  | 3.39846800  | -3.50604600 | -2.66801300 |
| H  | 2.74358200  | -3.01249100 | -3.37074200 |
| C  | 2.98330900  | -4.47961700 | -1.71176500 |
| H  | 1.98030100  | -4.86777100 | -1.60606600 |
| C  | 4.10374200  | -4.79739200 | -0.88447400 |
| H  | 4.10083700  | -5.47345300 | -0.04054100 |
| C  | 5.21338600  | -4.01615800 | -1.32885800 |
| H  | 6.19903300  | -4.00253700 | -0.88402300 |
| C  | 0.27540500  | -1.38706500 | 3.04000900  |
| C  | 1.36688700  | -0.56215900 | 3.35224300  |
| H  | 1.74269700  | 0.11017600  | 2.58668300  |
| C  | 1.97266800  | -0.60956200 | 4.60757900  |
| H  | 2.82425500  | 0.03038900  | 4.82354600  |
| C  | 1.48089300  | -1.47518400 | 5.58742900  |
| H  | 1.94082800  | -1.50671000 | 6.57110900  |
| C  | 0.39326700  | -2.29959600 | 5.29375500  |
| H  | 0.00677000  | -2.97909100 | 6.04877300  |
| C  | -0.19729000 | -2.26306700 | 4.02862200  |
| H  | -1.03267500 | -2.91955600 | 3.81062000  |
| C  | -2.04044500 | -2.08909200 | 1.47704200  |

|   |             |             |             |
|---|-------------|-------------|-------------|
| C | -2.51471300 | -3.02681600 | 0.54530400  |
| H | -1.85870300 | -3.40107500 | -0.23240200 |
| C | -3.83665600 | -3.47099100 | 0.58059900  |
| H | -4.17744800 | -4.19117300 | -0.15684400 |
| C | -4.72159800 | -2.97813200 | 1.54076400  |
| H | -5.75132200 | -3.32326500 | 1.56630700  |
| C | -4.27034000 | -2.03208900 | 2.46494700  |
| H | -4.94930600 | -1.63758100 | 3.21678600  |
| C | -2.94827700 | -1.59088200 | 2.42962700  |
| H | -2.61257000 | -0.84984200 | 3.14959100  |
| C | 2.30681900  | 0.82511500  | -2.88467000 |
| C | 3.46699200  | 0.18616700  | -3.66279300 |
| H | 4.24856100  | -0.19737400 | -3.00324800 |
| H | 3.92047500  | 0.93173900  | -4.32734300 |
| H | 3.11167300  | -0.64302400 | -4.28107800 |
| C | 2.78130600  | 1.98912800  | -2.00177300 |
| H | 1.95194600  | 2.40662100  | -1.42807300 |
| H | 3.17990300  | 2.79057500  | -2.63544900 |
| H | 3.56643500  | 1.69557400  | -1.30235100 |
| C | 1.24662200  | 1.34338100  | -3.87639300 |
| H | 0.85958800  | 0.53439100  | -4.50106900 |
| H | 1.69406200  | 2.10362400  | -4.52705900 |
| H | 0.40455300  | 1.80610500  | -3.35223800 |
| H | 0.43561800  | 0.31460900  | -1.14973200 |
| C | 0.73777000  | 4.50061200  | -0.05881800 |
| C | -0.13955600 | 3.44213100  | -0.39218000 |
| C | -0.93678900 | 3.51609300  | -1.53921200 |
| C | -0.83252100 | 4.66191800  | -2.32216200 |
| C | 0.04615600  | 5.71124600  | -1.98057800 |
| C | 0.85018900  | 5.64993800  | -0.84525900 |
| C | 0.90841600  | 2.84536500  | 1.40382100  |
| H | -1.59333200 | 2.69170200  | -1.79294500 |
| H | -1.43407500 | 4.74958000  | -3.22163900 |
| H | 0.10168600  | 6.58574600  | -2.62165500 |
| H | 1.53280800  | 6.45415700  | -0.59096800 |
| H | 1.25792100  | 2.29013500  | 2.26075300  |
| N | 1.38539000  | 4.09268100  | 1.09992600  |
| N | 0.00534800  | 2.41379000  | 0.54174800  |
| C | 2.49726300  | 4.77203100  | 1.75090900  |
| H | 2.27430400  | 5.84220000  | 1.77550400  |
| H | 2.54437200  | 4.42163100  | 2.78487900  |
| C | 3.81772600  | 4.50363500  | 1.02502100  |
| H | 3.99229500  | 3.41902400  | 1.00625300  |
| H | 3.71089400  | 4.79561600  | -0.02853900 |

|   |              |             |             |
|---|--------------|-------------|-------------|
| C | 6.31953700   | 4.88578100  | 0.87569500  |
| H | 7.17074600   | 5.40328100  | 1.32560300  |
| H | 6.53071700   | 3.80865100  | 0.88147400  |
| H | 6.25377000   | 5.18470800  | -0.17836800 |
| C | 5.03475200   | 5.18648000  | 1.60312900  |
| C | 4.99967000   | 5.99238900  | 2.66939500  |
| H | 5.90558800   | 6.45928700  | 3.04601000  |
| H | 4.08619900   | 6.22133200  | 3.20907300  |
| C | -4.38972600  | -0.47640000 | -1.21608100 |
| C | -2.99897000  | -0.36712200 | -1.44870800 |
| C | -2.36562600  | -1.20562700 | -2.37061900 |
| C | -3.16139000  | -2.12534600 | -3.04937700 |
| C | -4.54857000  | -2.22119300 | -2.81681700 |
| C | -5.18936600  | -1.39942500 | -1.89267700 |
| C | -3.48995600  | 1.05685600  | 0.10417400  |
| H | -1.29159200  | -1.16801800 | -2.53070400 |
| H | -2.69807900  | -2.79277600 | -3.76998900 |
| H | -5.13056000  | -2.95623600 | -3.36518400 |
| H | -6.25299100  | -1.48775000 | -1.69717300 |
| H | -3.42924200  | 1.81375200  | 0.87230400  |
| N | -4.67214500  | 0.44043600  | -0.21336800 |
| N | -2.46445700  | 0.60225800  | -0.59659400 |
| C | -5.96990400  | 0.66936500  | 0.40106100  |
| H | -6.40999800  | -0.30683300 | 0.62481900  |
| H | -5.80024400  | 1.17625200  | 1.35406400  |
| C | -6.89479200  | 1.49434500  | -0.49536900 |
| H | -6.41537200  | 2.46087500  | -0.70389800 |
| H | -6.98030400  | 1.00037300  | -1.47255000 |
| C | -9.17199200  | 2.55721900  | -0.84940800 |
| H | -10.16491700 | 2.70203200  | -0.41546700 |
| H | -8.73434100  | 3.54525900  | -1.04186600 |
| H | -9.29206700  | 2.07420400  | -1.82769700 |
| C | -8.28226000  | 1.73914400  | 0.05048100  |
| C | -8.70795200  | 1.27798900  | 1.23116300  |
| H | -9.71712500  | 1.48099500  | 1.57910000  |
| H | -8.08436000  | 0.68659100  | 1.89390800  |

**c7**

|    |             |             |             |
|----|-------------|-------------|-------------|
| Ni | 1.53464200  | -0.00552600 | 1.50784300  |
| Fe | -3.92317900 | -0.14125200 | -1.08117200 |
| P  | -1.78894800 | -2.14616500 | 0.68041600  |
| P  | 0.54690800  | 1.22831600  | 0.01602400  |
| O  | -2.44814300 | -3.34735700 | 0.04243500  |
| C  | -2.57956800 | -0.54344400 | 0.42109900  |

|   |             |             |             |
|---|-------------|-------------|-------------|
| C | -2.10409100 | 0.55438700  | -0.39448400 |
| C | -3.08075700 | 1.59532000  | -0.30885000 |
| H | -3.03096100 | 2.54437500  | -0.82004800 |
| C | -4.14906100 | 1.16034800  | 0.52293300  |
| H | -5.05258500 | 1.71428800  | 0.73662500  |
| C | -3.85135400 | -0.15595600 | 0.96915600  |
| H | -4.49373000 | -0.77959900 | 1.57227300  |
| C | -0.81838700 | 0.64912200  | -1.17425900 |
| H | -0.50304900 | -0.35704900 | -1.46909800 |
| C | -0.97460100 | 1.52103000  | -2.42521700 |
| H | -1.22780600 | 2.55162600  | -2.16772500 |
| H | -1.78119200 | 1.12714500  | -3.04799800 |
| H | -0.06017600 | 1.54392400  | -3.01798700 |
| C | -5.50671200 | -1.35609100 | -1.62681600 |
| H | -6.18242700 | -1.81022600 | -0.91520900 |
| C | -4.27932600 | -1.91782900 | -2.08645100 |
| H | -3.83057100 | -2.83513500 | -1.73189200 |
| C | -3.66446200 | -0.96991300 | -2.95859800 |
| H | -2.70529500 | -1.08922900 | -3.44279500 |
| C | -4.51317200 | 0.17683400  | -3.04029900 |
| H | -4.31137200 | 1.08282800  | -3.59489900 |
| C | -5.65309300 | -0.06177300 | -2.21444200 |
| H | -6.46174000 | 0.63285800  | -2.03323000 |
| C | -0.16815200 | 2.79029900  | 0.66367800  |
| C | -0.72884000 | 2.75546900  | 1.94829500  |
| H | -0.65263100 | 1.84355200  | 2.53142900  |
| C | -1.38034800 | 3.87280000  | 2.47028400  |
| H | -1.81606200 | 3.82930800  | 3.46418600  |
| C | -1.46659200 | 5.04508200  | 1.71732400  |
| H | -1.96987600 | 5.91773300  | 2.12317600  |
| C | -0.89543100 | 5.09663600  | 0.44373200  |
| H | -0.95115600 | 6.01014800  | -0.14131300 |
| C | -0.25136500 | 3.97612000  | -0.08185100 |
| H | 0.19697400  | 4.02806600  | -1.06806200 |
| C | 1.92661400  | 1.77102900  | -1.06810600 |
| C | 2.28036300  | 1.02084900  | -2.19905300 |
| H | 1.68343800  | 0.16665900  | -2.49456500 |
| C | 3.41421400  | 1.34468200  | -2.94316800 |
| H | 3.67003900  | 0.74519400  | -3.81019000 |
| C | 4.22210300  | 2.41590900  | -2.56037600 |
| H | 5.10640600  | 2.66724900  | -3.13849200 |
| C | 3.88934200  | 3.15997800  | -1.42610100 |
| H | 4.51345800  | 3.99445000  | -1.11880500 |
| C | 2.75306900  | 2.83977600  | -0.68314900 |

|   |             |             |             |
|---|-------------|-------------|-------------|
| H | 2.50537200  | 3.42350400  | 0.19719500  |
| C | -1.57101200 | -2.34377400 | 2.51877300  |
| C | -2.89816500 | -2.80095900 | 3.14423600  |
| H | -3.65522700 | -2.01294600 | 3.11546000  |
| H | -2.73656700 | -3.06133600 | 4.19691900  |
| H | -3.29473000 | -3.68021100 | 2.62961500  |
| C | -1.09878600 | -1.02969600 | 3.14866500  |
| H | -0.18295600 | -0.64711300 | 2.66567100  |
| H | -0.86997700 | -1.18428200 | 4.20892500  |
| H | -1.86051300 | -0.24996900 | 3.07107800  |
| C | -0.51455000 | -3.44648100 | 2.71372500  |
| H | -0.82827700 | -4.38426300 | 2.24652200  |
| H | -0.36232600 | -3.63070300 | 3.78342100  |
| H | 0.44996900  | -3.16389600 | 2.28159200  |
| H | -0.47506200 | -1.89656000 | 0.23335200  |
| C | 3.94082900  | -1.71205800 | -1.10257700 |
| C | 2.73429500  | -2.20577300 | -1.66486500 |
| C | 2.68504600  | -2.54833200 | -3.02355300 |
| C | 3.84180800  | -2.38602100 | -3.77921700 |
| C | 5.03210700  | -1.89046700 | -3.20518000 |
| C | 5.10193700  | -1.53897400 | -1.85990400 |
| C | 2.31795200  | -1.77004300 | 0.39590900  |
| H | 1.76658500  | -2.92884600 | -3.45923000 |
| H | 3.83366600  | -2.64787200 | -4.83296000 |
| H | 5.91307000  | -1.77593700 | -3.82949400 |
| H | 6.01437800  | -1.14273600 | -1.42725700 |
| H | 1.88728200  | -1.89672600 | 1.40171800  |
| N | 3.65713500  | -1.46329800 | 0.22552800  |
| N | 1.74387900  | -2.24145000 | -0.70166100 |
| C | 4.55132400  | -0.77914100 | 1.15880300  |
| H | 5.54520000  | -1.21852900 | 1.03043600  |
| H | 4.61500700  | 0.27562800  | 0.86811100  |
| C | 4.11940800  | -0.91640400 | 2.61674800  |
| H | 3.98913300  | -1.98385700 | 2.83738300  |
| H | 4.96965900  | -0.58782500 | 3.23321000  |
| C | 2.25600200  | -0.69304800 | 4.32257200  |
| H | 1.39460700  | -0.09790200 | 4.63611100  |
| H | 1.92858600  | -1.73520700 | 4.22402500  |
| H | 2.99214200  | -0.66904500 | 5.14117900  |
| C | 2.86208200  | -0.16134300 | 3.03839400  |
| C | 2.62633800  | 1.17387000  | 2.65752900  |
| H | 1.99398600  | 1.80926200  | 3.27524600  |
| H | 3.32656400  | 1.71417200  | 2.02207500  |

## c7-2

|    |             |             |             |
|----|-------------|-------------|-------------|
| Fe | -4.17204600 | -0.91061200 | 0.07113700  |
| P  | -2.44376300 | 2.02830700  | 0.06396900  |
| P  | 0.59014000  | -0.65368700 | 0.50106700  |
| O  | -3.63720200 | 2.65944700  | 0.74116800  |
| C  | -2.66512200 | 0.35028700  | -0.56268100 |
| C  | -2.11447500 | -0.87544200 | -0.02108300 |
| C  | -2.61355800 | -1.95012800 | -0.82041600 |
| H  | -2.39799500 | -2.99637800 | -0.66794500 |
| C  | -3.47850200 | -1.42199100 | -1.81783300 |
| H  | -4.04165200 | -1.99761300 | -2.53905400 |
| C  | -3.52619500 | -0.01102100 | -1.65786600 |
| H  | -4.13871300 | 0.66935900  | -2.22859800 |
| C  | -1.16413900 | -1.03774600 | 1.13439200  |
| H  | -1.36365600 | -0.25231800 | 1.87038000  |
| C  | -1.31180300 | -2.40845700 | 1.80254900  |
| H  | -1.03944900 | -3.21700600 | 1.12068200  |
| H  | -2.35138500 | -2.56148800 | 2.10379600  |
| H  | -0.67912800 | -2.49625300 | 2.68575700  |
| C  | -6.15521100 | -0.37504400 | 0.33154200  |
| H  | -6.71137500 | 0.22119200  | -0.37849000 |
| C  | -5.36913500 | 0.12980200  | 1.40855000  |
| H  | -5.17418100 | 1.17297800  | 1.61190600  |
| C  | -4.75005300 | -0.98063000 | 2.05696100  |
| H  | -4.06338000 | -0.92393400 | 2.89025100  |
| C  | -5.15671000 | -2.17315800 | 1.38291000  |
| H  | -4.83379200 | -3.17894800 | 1.61390600  |
| C  | -6.02556400 | -1.79793000 | 0.31398400  |
| H  | -6.47064100 | -2.46949500 | -0.40723900 |
| C  | 0.70832100  | -1.87312900 | -0.87204000 |
| C  | 0.43391200  | -1.42322400 | -2.17004500 |
| H  | 0.27157300  | -0.36830700 | -2.34681600 |
| C  | 0.39813400  | -2.31468500 | -3.24169000 |
| H  | 0.18720800  | -1.94539000 | -4.24081400 |
| C  | 0.64735800  | -3.67155100 | -3.03101500 |
| H  | 0.62643600  | -4.36654400 | -3.86550400 |
| C  | 0.93091800  | -4.13125500 | -1.74303400 |
| H  | 1.13192400  | -5.18489500 | -1.57170300 |
| C  | 0.95620600  | -3.23986800 | -0.67051200 |
| H  | 1.18218500  | -3.60850100 | 0.32344700  |
| C  | 1.69362500  | -1.33787600 | 1.80162400  |
| C  | 1.40554600  | -1.12257100 | 3.15930300  |
| H  | 0.47667800  | -0.64117700 | 3.44880100  |
| C  | 2.30861000  | -1.50631900 | 4.14939500  |

|    |             |             |             |
|----|-------------|-------------|-------------|
| H  | 2.06411700  | -1.33823900 | 5.19430900  |
| C  | 3.52431900  | -2.09831800 | 3.79937700  |
| H  | 4.22848400  | -2.39700600 | 4.57030700  |
| C  | 3.82997300  | -2.29377700 | 2.45216400  |
| H  | 4.77766000  | -2.73796800 | 2.16338300  |
| C  | 2.92535100  | -1.91387800 | 1.46008700  |
| H  | 3.18671400  | -2.06055900 | 0.41922100  |
| C  | -1.76394000 | 3.07916400  | -1.31549500 |
| C  | -2.63852700 | 2.99837800  | -2.57620000 |
| H  | -2.54732200 | 2.03010700  | -3.07266800 |
| H  | -2.31521400 | 3.76701400  | -3.28766200 |
| H  | -3.69361200 | 3.18227600  | -2.34915600 |
| C  | -0.33564700 | 2.62997200  | -1.64187200 |
| H  | 0.32748300  | 2.79475100  | -0.76638700 |
| H  | 0.08184700  | 3.24368500  | -2.44886600 |
| H  | -0.29268800 | 1.58878700  | -1.96512300 |
| C  | -1.77271700 | 4.52460700  | -0.78737100 |
| H  | -2.79386200 | 4.86779600  | -0.60738000 |
| H  | -1.30543300 | 5.18753100  | -1.52534100 |
| H  | -1.21916400 | 4.61945900  | 0.14957100  |
| H  | -1.29251300 | 1.87656400  | 0.88699400  |
| Ni | 1.12486400  | 1.47628300  | 0.37012500  |
| C  | 4.48904700  | 0.31356300  | -0.88426600 |
| C  | 3.74022000  | -0.27994400 | -1.93434700 |
| C  | 3.99148000  | -1.60655200 | -2.30641300 |
| C  | 5.00509400  | -2.28990900 | -1.64016700 |
| C  | 5.75865300  | -1.67589300 | -0.61782400 |
| C  | 5.50970700  | -0.36574100 | -0.21559300 |
| C  | 2.97675900  | 1.70992900  | -1.68504000 |
| H  | 3.40116300  | -2.07926000 | -3.08337700 |
| H  | 5.22154600  | -3.31908500 | -1.91012200 |
| H  | 6.54586400  | -2.24049400 | -0.12722100 |
| H  | 6.08073200  | 0.09778500  | 0.58211000  |
| N  | 3.97170800  | 1.58930400  | -0.74272900 |
| N  | 2.80882400  | 0.62859800  | -2.42051800 |
| C  | 4.38652200  | 2.58279600  | 0.24291600  |
| H  | 4.69408200  | 2.03702300  | 1.13877500  |
| H  | 5.26840400  | 3.11440000  | -0.13371800 |
| C  | 3.29361600  | 3.59140300  | 0.59146500  |
| H  | 3.76874000  | 4.32665300  | 1.26042800  |
| H  | 3.02544500  | 4.16576800  | -0.30578900 |
| C  | 1.08387700  | 4.18707400  | 1.64157700  |
| H  | 0.14930700  | 3.80807600  | 2.06511700  |
| H  | 1.54002900  | 4.85355800  | 2.39107200  |

|   |            |            |             |
|---|------------|------------|-------------|
| H | 0.83429600 | 4.81497500 | 0.77897300  |
| C | 2.03094500 | 3.06274300 | 1.26325800  |
| C | 2.04011500 | 1.88094000 | 2.03613900  |
| H | 1.34509200 | 1.78020200 | 2.86965000  |
| H | 2.92853600 | 1.26025700 | 2.13280300  |
| H | 2.43277600 | 2.63277800 | -1.81023500 |
